# Supplementary material for: Impact of non-communicable disease multimorbidity on health service use, catastrophic health expenditure and productivity loss in Indonesia: a population-based panel data analysis study
Source: PubMed Central journal article supplement — BMJ Open. 2021 Feb 17;11(2):e041870. doi: 10.1136/bmjopen-2020-041870 (PMC7893673; doi:10.1136/bmjopen-2020-041870), 2021-02-17
Supplement: bmjopen-2020-041870.draft_revisions.pdf [file bmjopen-2020-041870.draft_revisions.pdf]

# BMJ Open

BMJ Open is committed to open peer review. As part of this commitment we make the peer review history of every article we publish publicly available.

When an article is published we post the peer reviewers' comments and the authors' responses online. We also post the versions of the paper that were used during peer review. These are the versions that the peer review comments apply to.

The versions of the paper that follow are the versions that were submitted during the peer review process. They are not the versions of record or the final published versions. They should not be cited or distributed as the published version of this manuscript.

BMJ Open is an open access journal and the full, final, typeset and author-corrected version of record of the manuscript is available on our site with no access controls, subscription charges or pay-per-view fees (<http://bmjopen.bmj.com>).

If you have any questions on BMJ Open's open peer review process please email [info.bmjopen@bmj.com](mailto:info.bmjopen@bmj.com)

# BMJ Open

## Impact of multimorbidity on health service use, catastrophic health expenditure, and productivity loss in Indonesia: a population-based panel data analysis study

|                               |                                                                                                                                                                                                                                                                                                                                                                                                                                                                                                                                                                                                                                                                                                                                                                                                                                                                                                                                                                                                                                                                                                                                                                                                                                                                                                                       |
|-------------------------------|-----------------------------------------------------------------------------------------------------------------------------------------------------------------------------------------------------------------------------------------------------------------------------------------------------------------------------------------------------------------------------------------------------------------------------------------------------------------------------------------------------------------------------------------------------------------------------------------------------------------------------------------------------------------------------------------------------------------------------------------------------------------------------------------------------------------------------------------------------------------------------------------------------------------------------------------------------------------------------------------------------------------------------------------------------------------------------------------------------------------------------------------------------------------------------------------------------------------------------------------------------------------------------------------------------------------------|
| Journal:                      | <i>BMJ Open</i>                                                                                                                                                                                                                                                                                                                                                                                                                                                                                                                                                                                                                                                                                                                                                                                                                                                                                                                                                                                                                                                                                                                                                                                                                                                                                                       |
| Manuscript ID                 | bmjopen-2020-041870                                                                                                                                                                                                                                                                                                                                                                                                                                                                                                                                                                                                                                                                                                                                                                                                                                                                                                                                                                                                                                                                                                                                                                                                                                                                                                   |
| Article Type:                 | Original research                                                                                                                                                                                                                                                                                                                                                                                                                                                                                                                                                                                                                                                                                                                                                                                                                                                                                                                                                                                                                                                                                                                                                                                                                                                                                                     |
| Date Submitted by the Author: | 19-Jun-2020                                                                                                                                                                                                                                                                                                                                                                                                                                                                                                                                                                                                                                                                                                                                                                                                                                                                                                                                                                                                                                                                                                                                                                                                                                                                                                           |
| Complete List of Authors:     | <p>Marthias, Tiara; The University of Melbourne, Nossal Institute for Global Health; Gadjah Mada University, Department of Public Health, Faculty of Medicine, Public Health and Nursing</p> <p>Anindya, Kanya; The University of Melbourne, Nossal Institute for Global Health</p> <p>Ng, Nawi ; University of Gothenburg, Department of Public Health and Community Medicine</p> <p>McPake, B; The University of Melbourne, Nossal Institute for Global Health</p> <p>Atun, Rifat; Harvard University T H Chan School of Public Health, Department of Global Health and Population</p> <p>Arfyanto, Hafiz ; SMERU Research Institute</p> <p>Hulse, Emily ; The University of Melbourne, Nossal Institute for Global Health</p> <p>Zhao, Yang; The University of Melbourne, Nossal Institute for Global Health, The University of Melbourne</p> <p>Jusril, Hafizah; Universitas Indonesia, Center for Health Research</p> <p>Pan, Tianxin; The University of Melbourne, Center for Health Policy, School of Population and Global Health</p> <p>Ishida, Marie; The University of Melbourne, Nossal Institute for Global Health</p> <p>Lee, John; The University of Melbourne, Nossal Institute for Global Health; Imperial College London, Department of Primary Care and Public Health, School of Public Health</p> |
| Keywords:                     | PUBLIC HEALTH, Health policy < HEALTH SERVICES ADMINISTRATION & MANAGEMENT, Health economics < HEALTH SERVICES ADMINISTRATION & MANAGEMENT                                                                                                                                                                                                                                                                                                                                                                                                                                                                                                                                                                                                                                                                                                                                                                                                                                                                                                                                                                                                                                                                                                                                                                            |
|                               |                                                                                                                                                                                                                                                                                                                                                                                                                                                                                                                                                                                                                                                                                                                                                                                                                                                                                                                                                                                                                                                                                                                                                                                                                                                                                                                       |

SCHOLARONE™  
Manuscripts

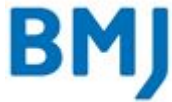

I, the Submitting Author has the right to grant and does grant on behalf of all authors of the Work (as defined in the below author licence), an exclusive licence and/or a non-exclusive licence for contributions from authors who are: i) UK Crown employees; ii) where BMJ has agreed a CC-BY licence shall apply, and/or iii) in accordance with the terms applicable for US Federal Government officers or employees acting as part of their official duties; on a worldwide, perpetual, irrevocable, royalty-free basis to BMJ Publishing Group Ltd ("BMJ") its licensees and where the relevant Journal is co-owned by BMJ to the co-owners of the Journal, to publish the Work in this journal and any other BMJ products and to exploit all rights, as set out in our [licence](#).

The Submitting Author accepts and understands that any supply made under these terms is made by BMJ to the Submitting Author unless you are acting as an employee on behalf of your employer or a postgraduate student of an affiliated institution which is paying any applicable article publishing charge ("APC") for Open Access articles. Where the Submitting Author wishes to make the Work available on an Open Access basis (and intends to pay the relevant APC), the terms of reuse of such Open Access shall be governed by a Creative Commons licence – details of these licences and which [Creative Commons](#) licence will apply to this Work are set out in our licence referred to above.

Other than as permitted in any relevant BMJ Author's Self Archiving Policies, I confirm this Work has not been accepted for publication elsewhere, is not being considered for publication elsewhere and does not duplicate material already published. I confirm all authors consent to publication of this Work and authorise the granting of this licence.

1  
2  
3 1 **Impact of multimorbidity on health service use, catastrophic health**  
4 **expenditure, and productivity loss in Indonesia: a population-based**  
5 **panel data analysis study**  
6  
7  
8  
9 4

10  
11 5 Tiara Marthias<sup>†</sup>, Kanya Anindya<sup>†\*</sup>, Nawi Ng, Barbara McPake, Rifat Atun, Hafiz  
12  
13 6 Arfyanto, Emily S G Hulse, Yang Zhao, Hafizah Jusril, Tianxin Pan, Marie Ishida,  
14  
15 7 John Tayu Lee  
16  
17  
18  
19 8

20  
21 9 <sup>†</sup> Co-first author (both contributed equally)  
22

23 10 \* Corresponding author  
24

25 11 Postal address: The Nossal Institute for Global Health, level 5, 333 Exhibition Street,  
26  
27 12 Melbourne, Victoria 3010 Australia.  
28

29  
30 13 E-mail address: kanindya@student.unimelb.edu.au  
31

32 14 Telephone number: +62 878 9966 9201  
33  
34  
35  
36  
37  
38  
39  
40  
41  
42  
43  
44  
45  
46  
47  
48  
49  
50  
51  
52  
53  
54

55 24 **Word count**  
56

57 25 Main text: 4081  
58

59 26 Abstract: 279  
60

1  
2  
3 27 **Abstract**  
4

5 28 **Objectives** To examine multimorbidity levels, and their relation to households'  
6  
7 socioeconomic characteristics, health service use, catastrophic health expenditures,  
8  
9 and productivity loss.  
10  
11

12 31  
13  
14 32 **Design** This observational study utilised a panel data of the Indonesian Family Life  
15  
16 Survey (IFLS) conducted in 2007 (Wave 4) and 2014 (Wave 5).  
17  
18  
19 34

20  
21 35 **Setting** The original sampling frame was based on 13 out of 27 provinces in 1993,  
22  
23 representing 83% of the population in Indonesia.  
24  
25

26 37  
27  
28 38 **Participants** We included respondents aged 50 years and above in 2007, excluding  
29  
30 those who did not participate in both Waves 4 and 5. Total participants in this study are  
31  
32 3,678 respondents.  
33  
34

35 41  
36  
37 42 **Primary outcome measures** This study examined three main outcomes; health service  
38  
39 use (outpatient and inpatient care), financial burden (catastrophic health expenditure),  
40  
41 and productivity loss (labour participation, days primary activity missed, days stayed  
42  
43 in bed).  
44  
45

46 46  
47  
48 47 **Results** Multimorbidity increased with sex, higher economic status, and higher  
49  
50 education attainment. Multimorbidity was associated with a substantially higher  
51  
52 number of outpatient visits (compared with those without NCDs, incidence rate ratio  
53  
54 [IRR] 4.30, 95% CI 3.37–5.47 for individuals with three or more NCDs), a higher  
55  
56 number of hospital visits (IRR 5.76, 95% CI 3.11–10.66 for individuals with three or  
57  
58  
59  
60

1  
2  
3 52 more NCDs). Multimorbidity was also associated with a greater likelihood of  
4  
5 53 experiencing catastrophic health expenditure (for three or more NCDs, adjusted odds  
6  
7 54 ratio [aOR] 1.68, 95% CI 0.13–2.52) and a lower participation in labour force (for three  
8  
9 55 or more NCDs, aOR 0.18, 95% CI 0.10–0.34) compared to those without NCDs.  
10  
11  
12  
13

14  
15  
16  
17  
18  
19  
20  
21  
22 56

23  
24 57 **Conclusions** Multimorbidity is associated with substantial direct and indirect costs to  
25  
26 58 individuals, households, and the wider society. Our study highlights the importance of  
27  
28 59 preparing health systems for addressing the burden of multimorbidity in LMICs.  
29  
30  
31  
32

33  
34  
35  
36  
37  
38  
39  
40  
41  
42  
43  
44  
45  
46  
47  
48  
49  
50  
51  
52  
53  
54  
55  
56  
57  
58  
59  
60

61 **Keywords** Multimorbidity, Indonesia, noncommunicable diseases, health service use,  
62 catastrophic health expenditure, productivity loss.

### Strengths and limitations of this study

- To our knowledge, our study provides the first comprehensive analysis using the only large longitudinal survey in Indonesia, which examined the impact of multimorbidity on health service use, catastrophic health expenditure, and productivity loss.
- This study applied multilevel mixed-effects regression models approach to examine factors associated with multimorbidity and its relation to the outcome variables, while taking into account the hierarchical (nested) nature of the dataset.
- Our findings should be interpreted with causation since the assessment of chronic diseases was mostly based on self-reporting, which may cause under-reporting of the prevalence.
- Despite the fifth waves of IFLS dataset was conducted between 2014 and 2015, the longitudinal design of the survey is extremely useful for measuring the impact of chronic diseases, accounting for within-individual variations over-time.

63

### 64 Introduction

65 Noncommunicable diseases (NCDs) continues to be the main cause of global burden  
66 of diseases, with 78% of NCD-related mortality concentrated in low-income and  
67 middle-income countries (LMICs).<sup>1</sup> Current COVID-19 global pandemic proves that  
68 the presence of NCDs can also increase fatality risk of a communicable disease.<sup>2</sup> In  
69 Indonesia, the third most populous country among LMICs (after China and India) with  
70 a population of 273 million, has seen rapid demographic and epidemiological  
71 transitions over the last few decades. The threat of NCDs is expected to rise with the  
72 aging population, or population aged 65 or above, that is projected to account for a  
73 quarter of the population by 2070.<sup>3</sup> Concurrently, the prevalence of multimorbidity,  
74 defined as the presence of two or more NCDs, is expected to rise rapidly in many  
75 LMICs as life expectancy with exposure to risk factors increase.<sup>4</sup> Indonesia has started  
76 recognizing NCDs burden for its substantial contribution to the top causes of death and  
77 disability-adjusted life years (DALYs).<sup>5</sup> NCDs are now on one of targets on 2020–2024  
78 National Medium-Term Development Plan and warrant one of key considerations on  
79 national health account.<sup>6</sup> However, current health programs remain limited to the

1  
2  
3 80 curative services focusing on single chronic disease as oppose to focusing on assessing  
4  
5 81 and mitigating the impact of multimorbidity on individual, health system and wider  
6  
7 82 society.  
8  
9

10 83  
11  
12 84 Current COVID-19 pandemic supplies hard evidence on the importance of strong  
13  
14 85 health system to better respond multimorbidity. Historically, the growing burden of  
15  
16 86 multimorbidity for health systems in LMICs were highlighted in the United Nations  
17  
18 87 High-Level Meetings on NCDs in 2011, 2014, and 2018.<sup>7</sup> LMICs typically have low  
19  
20 88 levels of government expenditure for health and inadequate health insurance coverage.  
21  
22 89 This very often results in high levels of out-of-pocket expenditure (OOPE) and risk of  
23  
24 90 impoverishing health care spending for patients with long-term health conditions.<sup>8,9</sup>  
25  
26 91 The economic burden multimorbidity is further compounded by the fact that  
27  
28 92 multimorbid patients are typically managed by multiple healthcare specialists in  
29  
30 93 LMICs.<sup>10</sup> This leads to inefficiencies with numerous different hospital visits,  
31  
32 94 polypharmacy, and suboptimal disease management.<sup>10,11</sup>  
33  
34  
35  
36  
37  
38  
39

40 96 Evidence from high-income countries (HICs) has found that apart from the negative  
41  
42 97 impact on health outcomes, multimorbidity imposes substantial economic costs on  
43  
44 98 individuals and households as patients with multimorbidity incur large medical  
45  
46 99 expenditures and are more likely to be absent from work.<sup>9,12,13</sup> To the best of our  
47  
48 100 knowledge, there is no study in Indonesia that has have examined the economic burden  
49  
50 101 of multimorbidity, as earlier studies have focused on the burden of a single NCD (such  
51  
52 102 as cardiovascular disease and diabetes).<sup>14</sup> As Indonesia constitute a vast and diverse  
53  
54 103 population and has the most diverse set of topologies and economic conditions, our  
55  
56 104 study may contribute to inform health systems reform across the region and beyond.  
57  
58  
59  
60



1  
2  
3 105 We present the first study that uses longitudinal data to examine multimorbidity levels,  
4  
5 106 and their relation to households' socioeconomic characteristics, health service use,  
6  
7 107 catastrophic health expenditures, and productivity loss. Our findings on multimorbidity  
8  
9 108 will support decision makers on the measures towards a more efficient and strengthen  
10  
11 109 health system in Indonesia.  
12  
13  
14  
15

110

## 111 **Methods**

### 112 **Sample and data**

113 The study used panel data from two waves of the Indonesian Family Life Survey (IFLS)  
114 conducted in 2007 (Wave 4) and 2014 (Wave 5). IFLS is an ongoing longitudinal  
115 survey that started in 1993 with four subsequent rounds of data collection (1997/1998,  
116 2000, 2007/2008, and 2014). The original sampling frame was based on 13 out of 27  
117 provinces in 1993, representing 83% of the population. Wave 5 was conducted between  
118 September 2014–March 2015, with 76% re-contact rate from the Wave 1 main  
119 respondents. The dataset contains individuals' and their household information,  
120 including sociodemographic characteristics, healthcare utilisation, health expenditure,  
121 and employment participation. The survey objectives and methods are detailed  
122 elsewhere.<sup>15,16</sup> In our analysis, we included respondents aged 50 years and above in  
123 2007, excluding those who did not participate in both Waves 4 and 5, and those with  
124 missing values for the study variable. Our final sample is 3,678 respondents (sample  
125 flowchart is presented in Figure S1). We report this study according to the  
126 Strengthening the Reporting of Observational Studies in Epidemiology (STROBE)  
127 guidelines (Table S1)

128

1  
2  
3 129 **Variables**  
4  
5

6 130 *Multimorbidity*  
7

8 131 Our main variable of interest was multimorbidity. The number of NCDs that was  
9  
10 132 included in Wave 5 was 14, but it was only 10 NCDs in Wave 4. For consistency, our  
11  
12 133 main analysis used 10 NCDs that were available in both waves. The 10 NCDs that were  
13  
14 134 consistently measured were the following: hypertension, diabetes, asthma, heart  
15  
16 135 attack/coronary heart diseases, liver disease, stroke, cancer, arthritis/rheumatism,  
17  
18 136 hypercholesterolemia, and depression/mental illness. The four NCDs that were only  
19  
20 137 included in Wave 4 were: prostate diseases, kidney diseases (excluding malignancy),  
21  
22 138 digestive diseases, and memory-related diseases.  
23  
24  
25  
26  
27  
28

29 139

30 140 NCD status was either identified through self-reporting or physical examination. In the  
31  
32 141 self-report section, respondents who answered affirmatively to the question, “Has a  
33  
34 142 doctor/paramedic/nurse/midwife ever told you that you had any of these conditions?”,  
35  
36 143 were defined as reporting an NCD. For hypertension and hypercholesterolemia, the  
37  
38 144 diagnoses were confirmed through physical examination conducted by trained nurses,  
39  
40 145 i.e. blood pressure and total cholesterol levels. All IFLS respondents aged 15 years and  
41  
42 146 older had their blood pressure recorded three times on alternate arms using Omron self-  
43  
44 147 inflating sphygmomanometers by trained nurses.<sup>15,16</sup> In our analysis, a respondent was  
45  
46 148 categorised as having hypertension if the mean measurement of systolic blood pressure  
47  
48 149 was  $\geq 140$  mm Hg and/or mean diastolic blood pressure was  $\geq 90$  mm Hg or the  
49  
50 150 respondent self-reported having been diagnosed with hypertension.<sup>17</sup> We also included  
51  
52 151 hypercholesterolemia, defined as total blood cholesterol value  $\geq 240$  mg/dl, as  
53  
54 152 morbidity.<sup>18</sup> It is important to note that different measurements of hypercholesterolemia  
55  
56  
57  
58  
59  
60

1  
2  
3 153 were used in Wave 4 and 5. Blood test for total cholesterol was performed in Wave 4  
4  
5 154 as opposed to self-reporting of hypercholesterolemia in Wave 5.  
6  
7  
8  
9 155

10  
11 156 For our analyses, a total of 10 NCDs were used to quantify the number of NCDs (0, 1,  
12  
13 157 2, 3 or more) and respondents with two or more NCDs were categorised as having  
14  
15 158 multimorbidity (categorised as 0 or 1). Previous studies have typically considered  
16  
17 159 hypertension, obesity, and hypercholesterolemia as risk factors of NCDs and their  
18  
19 160 inclusion in the multimorbidity clustering remains inconsistent.<sup>4,13</sup> Therefore, in the  
20  
21 161 sensitivity analysis, we included obesity, defined as having BMI  $\geq 25$  kg/m<sup>2</sup>, in the  
22  
23 162 clustering of multimorbidity (Table S10–12).<sup>19</sup> All statistical analyses were conducted  
24  
25 163 using STATA 13.0.  
26  
27  
28  
29  
30 164

### 31 32 165 ***Outcome variables***

33  
34 166 This study examined three main outcomes; health service use and financial burden as  
35  
36 167 the direct cost and; productivity loss as the indirect cost of multimorbidity. Respondents  
37  
38 168 were asked about the number of outpatient visits (in the last four weeks) and inpatient  
39  
40 169 visits (in the last 12 months) and out-of-pocket expenditure (OOPE). The data on OOPE  
41  
42 170 was also collected with four weeks recall period for outpatient visits and 12 months  
43  
44 171 recall period for inpatient visits (in the past year). We calculated the total annual OOPE  
45  
46 172 by multiplying OOPE for outpatient visits with 13 (as the reference period of outpatient  
47  
48 173 expenditure in the IFLS is four weeks and a year consists of 52 weeks), and added  
49  
50 174 OOPE for inpatient visits.  
51  
52  
53  
54

55 175

56  
57 176 Catastrophic health expenditure occurs when OOP spending on health services exceed  
58  
59 177 certain proportions of a household's expenditure. The proportions, or thresholds, used

1  
2  
3 178 in this study were 10% and 25% of total household expenditure (as proposed the  
4  
5 179 Sustainable Development Goal 3 (SDGs) targets), and the WHO's recommendation at  
6  
7 180 40% of household's capacity to pay. Capacity to pay is defined as the household's  
8  
9 181 capacity to pay for other expenses, including medical costs, after having household  
10  
11 182 subsistence needs met.<sup>20</sup> Household subsistence needs are proxied by the household  
12  
13 183 non-food expenditure variable. Catastrophic health expenditure ( $cata_h$ ) occurrence is  
14  
15 184 expressed as follows:

16  
17  
18  
19  
20 185 
$$cata_h = 1 \text{ if } \frac{HS_h}{THE_h} \text{ or } \frac{HS_h}{CTP_h} > z, \text{ and otherwise is zero.}$$

21  
22  
23 186 Where  $HS_h$  is the total OOPE for health,  $THE_h$  is the total household expenditure,  $CTP_h$   
24  
25 187 is capacity to pay, and  $z$  is given thresholds. All monetary values were adjusted for  
26  
27 188 inflation and converted to 2014 International Dollars.<sup>21</sup>

28  
29 189  
30  
31  
32 190 Productivity loss was assessed based on three variables: (1) labour participation; (2) the  
33  
34 191 number of days of primary activity missed due to poor health; and (3) number of days  
35  
36 192 confined to bed. Labour participation status was defined as the respondent's  
37  
38 193 employment status at the time of the survey. The number of days of primary daily  
39  
40 194 activity missed and days confined to bed were included in the health conditions section  
41  
42 195 of the survey with four weeks recall period.

#### 43 196 **Covariates**

44  
45  
46 197 Sociodemographic factors included were: sex, age groups (50-60, 61-70, above 70  
47  
48 198 years), marital status (not currently married and currently married), education (no  
49  
50 199 education, primary, junior high school, senior high school, tertiary), ethnicity  
51  
52 200 (Javanese, Sundanese, others), coverage of health insurance (no, yes), type of work  
53  
54 201 (unemployed, casual, self-employed, government/private), and respondents' economic  
55  
56 202 status (per capita expenditure for consumption). The economic status was categorized

1  
2  
3 203 into quintiles: q1 (lowest) to q5 (highest). We also included residency (rural, urban),  
4  
5 204 region of residency (Java-Bali, Sumatra, Nusa Tenggara, Kalimantan, Sulawesi), and  
6  
7  
8 205 period (using wave 2007 as the reference group) as covariates. Detailed definitions and  
9  
10 206 categorisations are available in (Table S2). It should be noted that IFLS did not include  
11  
12 207 the eastern regions, Papua and Papua Barat, which are considered to be  
13  
14  
15 208 underdeveloped.

16  
17 209

### 18 19 210 **Statistical analysis**

20  
21  
22 211 We described the patterns of multimorbidity across different population subgroups and  
23  
24 212 presented the weighted percentages with 95% confidence interval (CI). Taking into  
25  
26 213 account the hierarchical (nested) nature of the dataset (i.e. observations nested within  
27  
28 214 individuals, and individuals nested within households, and districts),<sup>22</sup> a multilevel  
29  
30 215 level model approach was used to examine factors associated with multimorbidity and  
31  
32 216 its relation to the outcome variables. Multilevel negative binomial regression models  
33  
34 217 were performed to examine the association between multimorbidity and the numbers  
35  
36 218 of outpatient visits and days in the hospital. We used negative binomial models instead  
37  
38 219 of Poisson models due to over-dispersion of the count data variable. We applied  
39  
40 220 multilevel logistic regression models to observe binary outcome variables and  
41  
42 221 calculated the intra-class correlation coefficients (ICC). The multilevel analyses were  
43  
44 222 conducted using unweighted data as our aim was on testing the association between  
45  
46 223 multimorbidity and the outcomes and examine the mixed effects, rather than deriving  
47  
48 224 nationally representative estimates.<sup>23</sup> We also conducted a robustness check to  
49  
50 225 investigate the association between multimorbidity and costs using the 2014 cross-  
51  
52 226 sectional dataset, that contains information for four additional NCDs than the 2007  
53  
54  
55  
56  
57  
58  
59 227 Wave.  
60

## 228 Patient and public involvement

229 No patients were involved in this study. Members of the public were not directly  
230 involved in this study.

## 231 Results

### 232 Descriptive statistics

233 Our total sample size was 3,678 respondents. Table 1 presents the respondents'  
234 characteristics by multimorbidity status in 2007 and 2014. The median age in 2007 was  
235 58 years (IQR 54–65), 53.9% [95% CI were female, 74.4% were married, 16.5% had  
236 at least secondary level or above education, just 25.5% had health insurance coverage,  
237 and 77.5% live in Java-Bali region. In 2014, the median age was 65 years (IQR 60–72),  
238 and health insurance coverage increased to 42.8%.

239 << insert Table 1>>

240 Overall, the prevalence of multimorbidity increased from 21.0% (95% CI 19.6–22.6)  
241 in 2007 to 22.0% (95% CI 20.6–23.6) in 2014. The prevalence of multimorbidity  
242 increased with rising socioeconomic status. For example, in 2014, the prevalence was  
243 18.0% (CI 16.9–20.7) in respondents with no education compared to 41.2% (95% CI  
244 31.6–51.6) in those with tertiary education. Similarly, the prevalence increased from  
245 13.5% (95% CI 11.1–16.2) to 36.2% (95% CI 32.2–40.5) between the lowest and  
246 highest wealth quintiles. The trend of increasing multimorbidity was observed for all  
247 age groups, shown in Fig 1, where the fifth and fourth household expenditure quintiles  
248 had a higher prevalence of multimorbidity than lower quintiles.

249 << insert Figure 1>>

250 Table 1 presents the factors associated with multimorbidity. The regression results  
251 show that multimorbidity was more likely among those with higher socioeconomic  
252 status. Respondents in the highest household expenditure were more likely to report

1  
2  
3 253 multimorbidity, compared with those in the lowest household expenditure quintile  
4  
5 254 (aOR 2.22, 95% CI 1.72–2.86). In comparison with those with lower educational  
6  
7  
8 255 attainment, respondents with higher educational attainment were more likely to  
9  
10 256 experience multimorbidity (aOR 1.54, 95% CI 1.01–2.34 for tertiary level completed).  
11  
12 257 Additionally, the prevalence of multimorbidity was higher in females than males (aOR  
13  
14 258 1.74, 95% CI 1.46–2.08) and those living in urban areas (aOR 1.41, 95% CI 1.19–1.67).  
15  
16  
17 259 The ICC shows that above 53% (1-[0.34+0.13]) of the variance can be ascribed to  
18  
19 260 between-individual level differences (Table S4).  
20  
21  
22 261

### 262 **Multimorbidity and health service use**

263 People with multimorbidity had a higher rate of outpatient and inpatient visits (Table  
264 2). In 2014, the proportion of outpatient visits among respondents with three or more  
265 NCDs (55.9% [95% CI 49.0–62.6]) was greater than those without NCDs (15.5% [95%  
266 CI 13.3–17.9]). Similarly, for inpatient visits, only 3.3% (95% CI 2.3–4.8) of those  
267 without NCD used inpatient service within one year of the survey compared to 20.8%  
268 (95% CI 15.7–27.0) among those with three or more NCDs.

269 << insert Table 2 >>

270 Our findings (Table 3) showed the association between the number of NCDs and health  
271 service use. The probability of using outpatient care and the number of visits increased  
272 with more NCD diagnoses. For instance, respondents with a single NCD were 1.35  
273 times more likely (95% CI 1.15–1.58) to have experienced an outpatient visit in the  
274 past four weeks compared to those without an NCD. The odds of an outpatient visit  
275 increased to 4.66 times (95% CI 3.55–6.11), while the incident rate increased by 4.25  
276 times (95% CI 3.33–5.42) in those with three or more NCDs. Similarly, the existence  
277 of NCD diagnosis increased the probability and number of inpatient visits. The

1  
2  
3 278 incidence of inpatient visits was 3.68 times (95% CI 2.21–6.12) higher in those with  
4  
5 279 three or more NCDs, compared to those without an NCD.  
6  
7  
8 280

9  
10 281 We reported the results of ICC in Table S4. We found that 14% and 11% of the variance  
11  
12 282 in the outpatient visit were attributable to the differences within-individual and  
13  
14 283 households, respectively. Between-individual variation accounted for the largest  
15  
16 284 variation, where it explained 75% (1-[0.14+0.11]) and 65% (1-[0.25+0.12]) of  
17  
18 285 outpatient and inpatient visit, respectively. No influence of district-level variables was  
19  
20 286 shown (ICC=0).  
21  
22  
23

24 287 << insert Table 3 >>

### 26 288 **Multimorbidity and financial burden**

27  
28 289 The mean OOPE for outpatient care incurred by respondents during the last four weeks  
29  
30 290 increased from INT\$17 in those without any NCDs to \$60 in those with three or more  
31  
32 291 NCDs in 2014 (Table 2). Similarly, for inpatient visits, having three or more NCDs  
33  
34 292 resulted in higher mean OOPE of \$762 (SD ± \$1,421) compared to \$566 (SD ± \$1,880)  
35  
36 293 for those without any NCDs. Total annual OOPE also increased from \$295 (SD ± \$977)  
37  
38 294 among those without any NCDs to \$968 (SD ± \$4,313) among those with three or more  
39  
40 295 NCDs. Table 2 also presents the proportion of respondents with catastrophic health  
41  
42 296 expenditure using different household budget thresholds. At 10% of total household  
43  
44 297 expenditure threshold, 5.0% (95% CI 3.7–6.6) of households without any member  
45  
46 298 having any NCDs experienced catastrophic health expenditure compared to 12.5%  
47  
48 299 (95% CI 8.7–17.7) of households with a member/s diagnosed with three or more NCDs.  
49  
50  
51 300 The results using 25% of total household expenditure and 40% of non-food  
52  
53 301 consumption thresholds also suggest that households with a member/s diagnosed with  
54  
55  
56  
57  
58  
59  
60



302 more than two NCDs had a higher proportion of catastrophic health expenditure  
303 compared to households without any member having any NCDs.

304

305 Table 4 presents the logistic regression results for the proportion of respondents who  
306 experienced catastrophic health expenditure, using both total household expenditure  
307 and non-food expenditure thresholds. At 10% of total household expenditure as the  
308 threshold, having two NCDs increases the odds of catastrophic health expenditure to  
309 1.58 times (95% CI 1.06–2.35), compared to having none. These odds increased to 1.69  
310 times for those having three NCDs or more (95% CI 1.02–2.81). At 25% and 40%  
311 thresholds, we found no significant association between the number of NCD diagnoses  
312 and the incidence of catastrophic health expenditure.

313 << insert Table 4 >>

#### 314 **Multimorbidity and productivity loss**

315 More NCDs diagnoses was associated with greater productivity loss (Table 2, Table 5).  
316 For example, among those aged 50–60 years old, only 49.8% (CI 36.7–62.9) of  
317 respondents with three or more NCDs were employed, compared with 84.3% (CI 79.8–  
318 88.0) of respondents without NCDs (Table 2). The mean number of days of primary  
319 daily activity missed increased substantially from 2.7 days (SD ± 6.0), for those without  
320 any NCDs, to 10.1 days (SD ± 12.1) for those with three or more NCDs. The mean  
321 number of days confined to bed also increased from 0.80 days (SD ± 3.4), for those  
322 without any NCD, to 2.4 days (SD ± 6.3) for those with three or more NCDs.

323

324 Table 5 presents that individuals diagnosed with three or more NCDs were 0.23 times  
325 less likely (95% CI 0.16–0.33) to be employed compared to those without NCDs.  
326 Compared with those without NCD, being diagnosed with multiple NCDs (three or

327 more) were expected to have a higher incidence rate of missing days of primary activity  
328 (IRR 2.59, 95% CI 1.97–3.41) as well as days spent in bed (IRR 2.64, 95% CI 1.60–  
329 4.36). We found that 48% of the variance in the labour participation was due to within-  
330 individual variations, while between-individual variation accounted for 23% (1-  
331 [0.48+0.28+0.01]) (Table S4).

332 << insert Table 5>>

### 333 **Robustness check**

334 Our robustness analysis using cross-sectional analysis using 2014 cross-sectional  
335 dataset that consists of 14 physical NCDs (Table S5-8) showed consistent results with  
336 our original findings. Higher household expenditure (aOR 2.03, 95% CI 1.65–2.50 for  
337 the highest quintile, compared with the lowest quintile and education status) and higher  
338 education (aOR 1.77, 95% CI 1.33–2.36 for tertiary level completed, compared with  
339 those with no formal education) were associated with greater burden of multimorbidity.  
340 Also, in line with our original findings, multimorbidity was associated with higher  
341 health care use, higher incidence of catastrophic health expenditures, and lower  
342 productivity. The association between multimorbidity and catastrophic health  
343 expenditure was more pronounced in the cross-sectional analysis.

344

### 345 **Discussion**

346 Our study provides the first comprehensive analysis of multimorbidity in Indonesia  
347 using the only large panel dataset in Indonesia. Our study reveals that almost one in  
348 four Indonesian people aged 50 years or above has at least two NCDs, with 6.5% having  
349 three or more in 2014. Our findings show a higher prevalence of multimorbidity in  
350 richer population groups (as measured by household per capita expenditure in the

1  
2  
3 351 surveys). Multimorbidity was associated with higher use of healthcare services, higher  
4  
5 352 probability of catastrophic health expenditure, and a reduction in productivity.  
6  
7  
8 353

9  
10 354 Analyses of socioeconomic gradients of NCDs in HICs routinely find negative  
11  
12 355 socioeconomic gradients. However, this is not the case for LMICs, which have a more  
13  
14 356 mixed pattern of the distribution of risk factors.<sup>24,25</sup> Other studies find a similar picture  
15  
16 357 with diabetes and cardiovascular diseases in LMICs undergoing epidemiological  
17  
18 358 transition.<sup>25</sup> These conditions predominate in high-income quintiles in early stages of  
19  
20 359 transition. However, our results on socioeconomic patterning of multimorbidity can  
21  
22 360 also be explained by the fact that higher-income and higher-educational groups, who  
23  
24 361 have better access to healthcare services and better health literacy, are more likely to  
25  
26 362 have NCDs diagnosed (or even over-diagnosed) than lower socio-income groups.  
27  
28  
29  
30

31  
32 363

33  
34  
35 364 Our findings that show having more NCDs is associated with greater use of outpatient  
36  
37 365 and inpatient services is in line with earlier studies from both HICs and LMICs.<sup>4,10,26</sup>  
38  
39 366 The presence of multimorbidity was also associated with a greater financial burden, as  
40  
41 367 measured by catastrophic health expenditures, which is mainly driven by higher  
42  
43 368 healthcare use; these findings are consistent with earlier studies.<sup>4,11,26,27</sup> Based on a  
44  
45 369 previous Indonesian study, four NCDs (hypertension, diabetes, heart problems, and  
46  
47 370 stroke) are the leading causes of mortality, and were estimated to account for 12% of  
48  
49 371 Indonesia's OOPE in 2020.<sup>13</sup> Furthermore, impoverishment effect of multimorbidity  
50  
51 372 has been previously documented and is confirmed in our study.<sup>8,9,12,13</sup>  
52  
53  
54  
55

56 373

57  
58 374 This study contributes to the growing evidence that multimorbidity has a substantial  
59  
60 375 impact on disability and employment productivity.<sup>8,10,13</sup> Interventions that can help

1  
2  
3 376 effectively manage multimorbidity have the potential for generating substantial returns  
4  
5 377 on improved health, work productivity and social benefits. Therefore, strategies aimed  
6  
7 378 at addressing multimorbidity can be considered as an ‘investment’ rather than a cost,  
8  
9 379 with the costs of the interventions largely ‘offset’ by long-term cost savings achieved  
10  
11 380 from improved health and productivity.<sup>28</sup>  
12  
13  
14

15 381

16  
17 382 This study provides the first evidence to inform policies and the development of  
18  
19 383 targeted strategies for multimorbidity in Indonesia, where preventive and promotive  
20  
21 384 services against NCDs are inadequate and a large portion of government health  
22  
23 385 expenditure is still geared towards curative care.<sup>5</sup> Renewing focus on health promotion  
24  
25 386 and NCD prevention requires a strong primary health care (PHC) system.<sup>10</sup> PHC is the  
26  
27 387 entry point of a sustainable health system for the early detection of risk factors and  
28  
29 388 initiation of treatment-seeking pathway for patients with NCDs, and thus, plays a  
30  
31 389 crucial role for NCD prevention and provision of long-term integrated care. Such  
32  
33 390 policies would be in line with the current program of the Ministry of Health in Indonesia  
34  
35 391 to reorient public PHC to provide more promotive and preventive health services, such  
36  
37 392 as through the implementation of Chronic Diseases Management Program (Prolanis) in  
38  
39 393 PHC.<sup>29,30</sup> However, the participation to this program remains low due to the poor access  
40  
41 394 to PHC facilities, especially in outside Java region. There is a need to engage private  
42  
43 395 sector, which makes up 60% of health facilities in Indonesia, to expand the coverage of  
44  
45 396 NCD promotive and prevention activities.<sup>31</sup> Furthermore, the development of digital  
46  
47 397 health solution for NCDs prevention and control should be included in the national  
48  
49 398 COVID-19 plan.<sup>32</sup>  
50  
51  
52  
53  
54  
55

56 399  
57  
58  
59  
60

1  
2  
3 400 Worldwide, disease-specific clinical guidelines are inadequate for the effective  
4  
5 401 management of individuals with multimorbidity.<sup>10,33</sup> Although most countries and  
6  
7 402 international health organizations have recognized the importance of multimorbidity  
8  
9 403 (30), most health policies and programs still focus on single diseases. In Indonesia,  
10  
11 404 current clinical practices and public health intervention largely focus on a single-  
12  
13 405 disease framework. For example, Indonesia currently has no official clinical guideline  
14  
15 406 to manage multimorbidity. Furthermore, under the current national health insurance  
16  
17 407 scheme, the hospital reimbursement system that uses case-based groups has created  
18  
19 408 significant gaps between reimbursable costs and actual hospital expenses.<sup>34</sup> The  
20  
21 409 reimbursement system, which is mainly based on primary diagnosis, limits the  
22  
23 410 hospital's capacity and willingness to treat complicated cases such as those with  
24  
25 411 multimorbidity.<sup>35</sup> Thus, it is important to develop a clinical guideline for  
26  
27 412 multimorbidity in Indonesia and other LMICs, along with payment systems that would  
28  
29 413 ensure quality health services at both primary and secondary levels of care for patients  
30  
31 414 with multimorbidity.  
32  
33  
34  
35  
36  
37  
38  
39  
40  
41

416 There are several limitations to our study. First, the IFLS-5 was conducted between  
417 2014 and 2015, which may not able to capture current prevalence of multimorbidity in  
418 Indonesia. Despite this limitation, IFLS is the only longitudinal survey available in  
419 Indonesia that is useful to produce more accurate estimates compared with using cross-  
420 sectional dataset (e.g. the National Socioeconomic Survey). Second, our findings  
421 should be interpreted with causation since the assessment of chronic diseases was  
422 mostly based on self-reporting and may cause under-reporting of the prevalence. The  
423 health service use and OOP spending were also based on self-reporting and prone to  
424 recall bias.<sup>36</sup> Third, the IFLS sampling frame did not include Eastern regions of

1  
2  
3 425 Indonesia. There is a need to extend the multimorbidity assessment to the remaining  
4  
5 426 Indonesian regions. Fourth, this research intentionally focused on the older population  
6  
7 427 due to a significantly higher burden of NCDs in this population group. Future research  
8  
9 428 should use cohort data to follow patients over a longer time period to examine the  
10  
11 429 impact of multimorbidity and its effects in younger population groups in LMICs.<sup>13</sup>  
12  
13  
14  
15  
16

17 430

### 17 431 **Conclusion**

18  
19 432 Multimorbidity poses substantial costs to individuals, households, health system and  
20  
21 433 the wider society in Indonesia, which has an increasingly aging population.  
22  
23 434 Policymakers and employers in Indonesia should carefully design and invest in targeted  
24  
25 435 public health and workplace interventions at personal and population level to avert the  
26  
27 436 adverse health and economic consequences of multimorbidity.  
28  
29  
30

31 437

### 32 438 **Declarations**

### 33 439 **Abbreviation**

34  
35 440 CHE: Catastrophic health expenditure; HICs: High-income countries; IFLS: Indonesian Family Life  
36  
37 441 Survey; LMICs: Low-middle income countries; NCDs: Noncommunicable diseases; OOPE: Out-  
38  
39 442 of-pocket expenditure; PHC: Primary health care.  
40  
41

### 42 443 **Competing interests**

43  
44 444 The authors have declared that no competing interests exist.  
45

### 46 445 **Ethics approval**

47  
48 446 The IFLS has been approved by ethics review boards at RAND Corporation and Gadjah Mada  
49  
50 447 University in Indonesia. Written informed consent was sought from all respondents prior to data  
51  
52 448 collection.  
53

### 54 449 **Author's contributions**

55  
56 450 Author's contributions: The aim of the research was developed by TM, KA, JL. The methodology  
57  
58 451 development and analysis were conducted by TM, KA, HA, TP, JL. EH assisted in drafting the  
59  
60

1  
2  
3 452 discussion section and proofread all section. YZ, HJ, MI contributed to background and discussion  
4  
5 453 section. NN, BM, RA, JL provided critical input in revising the manuscript. All authors reviewed,  
6  
7 454 edited and commented on multiple versions of the manuscript.  
8

9 455 **Author details**

10 456 <sup>1</sup>Nossal Institute for Global Health, The University of Melbourne, Melbourne, Australia

11 457 <sup>2</sup>Department of Public Health, Faculty of Medicine, Public Health and Nursing, Universitas Gadjah

12 458 Mada, Yogyakarta, Indonesia <sup>3</sup>Department of Public Health and Community Medicine, University

13 459 of Gothenburg, Sweden <sup>4</sup>Department of Global Health and Population, Harvard T.H. Chan School

14 460 of Public Health, Harvard University, Boston, MA, USA <sup>5</sup>SMeRU Research Institute, Jakarta,

15 461 Indonesia <sup>6</sup>School of Population and Global Health, The University of Melbourne, Melbourne,

16 462 Australia <sup>7</sup>Center for Health Research, Faculty of Public Health, Universitas Indonesia, Depok,

17 463 Indonesia <sup>8</sup>Center for Health Policy, School of Population and Global Health, The University of

18 464 Melbourne, Melbourne, Australia <sup>9</sup>Department of Primary Care and Public Health, School of Public

19 465 Health, Imperial College London, United Kingdom

20 466 **Availability of data and materials**

21 467 The datasets are publicly accessible after registration ([https://www.rand.org/well-being/social-and-](https://www.rand.org/well-being/social-and-behavioral-policy/data/FLS/IFLS/access.html)

22 468 [behavioral-policy/data/FLS/IFLS/access.html](https://www.rand.org/well-being/social-and-behavioral-policy/data/FLS/IFLS/access.html)).

23 469 **Acknowledgements**

24 470 The authors of the paper express sincere gratitude to the RAND for providing access to the data.

25 471 We acknowledge Nur Arna Sucianti from SurveyMeter, for guiding us with data merging.

26 472 **Funding**

27 473 This research received no specific grant from any funding agency in the public, commercial or

28 474 not-for-profit sectors

475 **References**

- 476 1. WHO. *Noncommunicable diseases country profiles 2018*. Geneva: World  
477 Health Organization, [https://www.who.int/nmh/publications/ncd-profiles-](https://www.who.int/nmh/publications/ncd-profiles-2018/en/)  
478 [2018/en/](https://www.who.int/nmh/publications/ncd-profiles-2018/en/) (2018).
- 479 2. Zhou F, Yu T, Du R, et al. Clinical course and risk factors for mortality of  
480 adult inpatients with COVID-19 in Wuhan, China: a retrospective cohort study.  
481 *Lancet* 2020; 395: 1054–1062.
- 482 3. United Nations, Department of Economic and Social Affairs PD. World  
483 population prospects 2019, online edition. Rev. 1.,  
484 <https://population.un.org/wpp/Download/Standard/Population/> ( (2019,  
485 accessed 8 March 2020).
- 486 4. Hussain MA, Huxley RR, Al Mamun A. Multimorbidity prevalence and pattern  
487 in Indonesian adults: An exploratory study using national survey data. *BMJ*  
488 *Open* 2015; 5: e009810.
- 489 5. Mboi N, Murty Surbakti I, Trihandini I, et al. On the road to universal health  
490 care in Indonesia, 1990–2016: a systematic analysis for the Global Burden of  
491 Disease Study 2016. *Lancet* 2018; 392: 581–591.
- 492 6. Agustina R, Dartanto T, Sitompul R, et al. Universal health coverage in  
493 Indonesia: concept, progress, and challenges. *Lancet* 2019; 393: 75–102.
- 494 7. United Nations. Political declaration of the third high-level meeting of the  
495 General Assembly on the prevention and control of non-communicable  
496 diseases, [https://www.un.org/en/ga/search/view\\_doc.asp?symbol=A/RES/73/2](https://www.un.org/en/ga/search/view_doc.asp?symbol=A/RES/73/2)  
497 (2018, accessed 8 March 2020).
- 498 8. Sum G, Hone T, Atun R, et al. Multimorbidity and out-of-pocket expenditure  
499 on medicines: a systematic review. *BMJ Glob Heal* 2018; 3: e000505.



- 1  
2  
3 500 9. Wang L, Si L, Cocker F, et al. A systematic review of cost-of-illness studies of  
4  
5 501 multimorbidity. *Applied Health Economics and Health Policy* 2018; 16: 15–29.  
6  
7  
8 502 10. Barnett K, Mercer SW, Norbury M, et al. Epidemiology of multimorbidity and  
9  
10 503 implications for health care, research, and medical education: a cross-sectional  
11  
12 504 study. *Lancet (London, England)* 2012; 380: 37–43.  
13  
14  
15 505 11. Salisbury C. Multimorbidity: redesigning health care for people who use it.  
16  
17 506 *Lancet (London, England)* 2012; 380: 7–9.  
18  
19 507 12. Jaspers L, Colpani V, Chaker L, et al. The global impact of non-communicable  
20  
21 508 diseases on households and impoverishment: a systematic review. *European*  
22  
23 509 *Journal of Epidemiology* 2014; 30: 163–188.  
24  
25  
26 510 13. Lee JT, Hamid F, Pati S, et al. Impact of Noncommunicable Disease  
27  
28 511 Multimorbidity on Healthcare Utilisation and Out-Of-Pocket Expenditures in  
29  
30 512 Middle-Income Countries: Cross Sectional Analysis. *PLoS One* 2015; 10:  
31  
32 513 e0127199.  
33  
34  
35 514 14. Finkelstein EA, Chay J, Bajpai S. The Economic Burden of Self-Reported and  
36  
37 515 Undiagnosed Cardiovascular Diseases and Diabetes on Indonesian Households.  
38  
39 516 *PLoS One* 2014; 9: e99572.  
40  
41  
42 517 15. Strauss J, Witoelar F, Sikoki B. *The fifth wave of Indonesia Family Life Survey:*  
43  
44 518 *Overview and Field Report*. Santa Monica, California, 2016.  
45  
46  
47 519 16. Straus J, Witoelar F, Sikoki B, et al. *The fourth wave of the Indonesia Family*  
48  
49 520 *Life Survey: overview and field report*. 2019.  
50  
51  
52 521 17. Chobanian A V., Bakris GL, Black HR, et al. The Seventh Report of the Joint  
53  
54 522 National Committee on Prevention, Detection, Evaluation, and Treatment of  
55  
56 523 High Blood Pressure: The JNC 7 Report. *Journal of the American Medical*  
57  
58 524 *Association* 2003; 289: 2560–2572.  
59  
60

- 1  
2  
3 525 18. Grundy SM, Cleeman JI, Bairey Merz CN, et al. Implications of recent clinical  
4  
5 526 trials for the National Cholesterol Education Program Adult Treatment Panel  
6  
7 527 III guidelines. *Circulation* 2004; 110: 227–239.
- 8  
9 528 19. Pacific WHORO for the W. *The Asia-Pacific perspective : redefining obesity*  
10  
11 529 *and its treatment*. Sydney : Health Communications Australia,  
12  
13 530 <http://iris.wpro.who.int/handle/10665.1/5379>.
- 14  
15 531 20. Xu K, Saksena P, Jowett M, et al. Exploring the thresholds of health  
16  
17 532 expenditure for protection against financial risk. *World Heal Rep* 2010;  
18  
19 533 Background: 328–333.
- 20  
21 534 21. Organisation for Economic Co-operation and Development (OECD).  
22  
23 535 Purchasing power parities (PPP), [https://data.oecd.org/conversion/purchasing-](https://data.oecd.org/conversion/purchasing-power-parities-ppp.htm)  
24  
25 536 [power-parities-ppp.htm](https://data.oecd.org/conversion/purchasing-power-parities-ppp.htm) (2019, accessed 10 September 2019).
- 26  
27 537 22. Vaezghasemi M, Ng N, Eriksson M, et al. Households, the omitted level in  
28  
29 538 contextual analysis: Disentangling the relative influence of households and  
30  
31 539 districts on the variation of BMI about two decades in Indonesia. *International*  
32  
33 540 *Journal for Equity in Health* 2016; 15: 102.
- 34  
35 541 23. Lee ES, Forthofer RN. *Analyzing complex survey data*. Second edi. SAGE  
36  
37 542 Publications, 2006. Epub ahead of print 2006. DOI:  
38  
39 543 <https://dx.doi.org/10.4135/9781412983341>.
- 40  
41 544 24. Hosseinpoor AR, Bergen N, Kunst A, et al. Socioeconomic inequalities in risk  
42  
43 545 factors for non communicable diseases in low-income and middle-income  
44  
45 546 countries: results from the World Health Survey. *BMC Public Health* 2012; 12:  
46  
47 547 912.
- 48  
49 548 25. Manne-Goehler J, Atun R, Stokes A, et al. Diabetes diagnosis and care in sub-  
50  
51 549 Saharan Africa: pooled analysis of individual data from 12 countries. *lancet*
- 52  
53  
54  
55  
56  
57  
58  
59  
60

- 1  
2  
3 550 *Diabetes Endocrinol* 2016; 4: 903–912.
- 4  
5 551 26. Wang HHX, Wang JJ, Wong SYS, et al. Epidemiology of multimorbidity in  
6  
7 552 China and implications for the healthcare system: cross-sectional survey among  
8  
9 553 162,464 community household residents in southern China. *BMC Med* 2014;  
10  
11 554 12: 188.
- 12  
13 555 27. Mondor L, Maxwell CJ, Hogan DB, et al. Multimorbidity and healthcare  
14  
15 556 utilization among home care clients with dementia in Ontario, Canada: A  
16  
17 557 retrospective analysis of a population-based cohort. Epub ahead of print 2017.  
18  
19 558 DOI: 10.1371/journal.pmed.1002249.
- 20  
21 559 28. Cancelliere C, Cassidy JD, Ammendolia C, et al. Are workplace health  
22  
23 560 promotion programs effective at improving presenteeism in workers? A  
24  
25 561 systematic review and best evidence synthesis of the literature. *BMC Public*  
26  
27 562 *Health*; 11. Epub ahead of print 2011. DOI: 10.1186/1471-2458-11-395.
- 28  
29 563 29. Kemenkes akan memperkuat fungsi preventif dan promotif melalui akreditasi  
30  
31 564 puskesmas. *Kompas id*, 28 October 2019.
- 32  
33 565 30. Gani A, Budiharsana M. *The consolidated report on Indonesia health sector*  
34  
35 566 *review 2018*. 2018.
- 36  
37 567 31. Mahendradhata Y, Trisnantoro L, Listyadewi S, et al. The Republic of  
38  
39 568 Indonesia Health System Review. Asia Pacific Observatory on Health Systems  
40  
41 569 and Policies. *Health Syst Transit* 2017; 7: xxvi, 66.
- 42  
43 570 32. World Health Organization. *Preliminary results: Rapid assessment of service*  
44  
45 571 *delivery noncommunicable diseases (NCDs) during the COVID-19 pandemic*.  
46  
47 572 2020.
- 48  
49 573 33. Hoffmann T, Jansen J, Glasziou P. The importance and challenges of shared  
50  
51 574 decision making in older people with multimorbidity. Epub ahead of print

- 1  
2  
3 575 2018. DOI: 10.1371/journal.pmed.1002530.  
4  
5 576 34. Satibi S, Andayani TM, Endarti D, et al. Comparison of real cost versus the  
6  
7 577 indonesian case base groups (INA-CBGs) tariff rates among patients of high-  
8  
9 578 incidence cancers under the national health insurance scheme. *Asian Pac J*  
10  
11 579 *Cancer Prev* 2019; 20: 117–122.  
12  
13 580 35. Schröders J, Wall S, Hakimi M, et al. How is Indonesia coping with its  
14  
15 581 epidemic of chronic noncommunicable diseases? A systematic review with  
16  
17 582 meta-analysis. *PLoS One* 2017; 12: e0179186.  
18  
19 583 36. Vellakkal S, Subramanian S V, Millett C, et al. Socioeconomic Inequalities in  
20  
21 584 Non-Communicable Diseases Prevalence in India: Disparities between Self-  
22  
23 585 Reported Diagnoses and Standardized Measures. *PLoS One* 2013; 8: e68219.  
24  
25 586  
26  
27  
28  
29  
30  
31 587  
32  
33  
34  
35  
36  
37  
38  
39  
40  
41  
42  
43  
44  
45  
46  
47  
48  
49  
50  
51  
52  
53  
54  
55  
56  
57  
58  
59  
60

588 **Tables & Figures**

589

590 **Table 1. Sample characteristics and factors associated with multimorbidity**

| Characteristics                  | 2007         |                           | 2014         |                           | Factors associated with multimorbidity |         |
|----------------------------------|--------------|---------------------------|--------------|---------------------------|----------------------------------------|---------|
|                                  | Total n (%)  | Multimorbidity % (95% CI) | Total n (%)  | Multimorbidity % (95% CI) | aOR (95% CI)                           | p value |
| Overall                          | 3678 (100%)  | 21.0 (19.6–22.6)          | 3678 (100%)  | 22.0 (20.6–23.6)          |                                        |         |
| Sex                              |              |                           |              |                           |                                        |         |
| Male                             | 1664 (46.1%) | 14.1 (12.3–16.1)          | 1663 (46.0%) | 19.4 (17.3–21.6)          | 1                                      |         |
| Female                           | 2014 (53.9%) | 26.9 (24.8–29.2)          | 2015 (54.0%) | 24.3 (22.3–26.4)          | 1.74 (1.46–2.08)                       | <0.0001 |
| Age                              |              |                           |              |                           |                                        |         |
| 50 – 60 years                    | 2210 (59.8%) | 19.9 (18.1–21.8)          | 966 (25.6%)  | 23.5 (20.7–26.7)          | 1                                      |         |
| 61 – 70 years                    | 1069 (29.9%) | 21.9 (19.2–24.8)          | 1562 (42.9%) | 21.6 (19.4–23.9)          | 1.10 (0.93–1.31)                       | 0.257   |
| 71+ years                        | 399 (10.3%)  | 25.2 (20.6–30.4)          | 1150 (31.4%) | 21.4 (18.8–24.2)          | 1.09 (0.87–1.38)                       | 0.444   |
| Marital status                   |              |                           |              |                           |                                        |         |
| Not currently married            | 927 (25.6%)  | 26.1 (23.0–29.4)          | 1338 (36.3%) | 23.3 (20.9–25.9)          | 1                                      |         |
| Currently married                | 2751 (74.4%) | 19.3 (17.7–21.1)          | 2340 (63.7%) | 21.3 (19.5–23.2)          | 1.03 (0.86–1.24)                       | 0.742   |
| Educational level                |              |                           |              |                           |                                        |         |
| No education                     | 2049 (58.7%) | 20.4 (18.5–22.5)          | 2098 (60.6%) | 18.0 (16.2–19.8)          | 1                                      |         |
| Primary                          | 903 (24.8%)  | 19.7 (17.0–22.7)          | 862 (23.0%)  | 24.0 (20.9–27.3)          | 1.19 (0.98–1.44)                       | 0.081   |
| Junior high school               | 273 (6.4%)   | 25.9 (20.5–32.3)          | 271 (6.3%)   | 36.3 (30.2–43.0)          | 1.50 (1.12–2.02)                       | 0.007   |
| Senior high school               | 324 (7.2%)   | 20.5 (15.8–25.9)          | 307 (7.0%)   | 29.5 (24.1–35.5)          | 0.96 (0.71–1.29)                       | 0.778   |
| Tertiary                         | 129 (2.9%)   | 34.4 (25.2–44.8)          | 140 (3.1%)   | 41.2 (31.6–51.6)          | 1.54 (1.01–2.34)                       | 0.043   |
| Ethnicity                        |              |                           |              |                           |                                        |         |
| Javanese                         | 1684 (51.8%) | 19.4 (17.4–21.5)          | 1781 (55.8%) | 19.7 (17.8–21.8)          | 1                                      |         |
| Sundanese                        | 424 (15.9%)  | 29.1 (24.8–33.9)          | 438 (16.3%)  | 27.3 (23.1–31.8)          | 1.38 (1.08–1.77)                       | 0.010   |
| Others                           | 1570 (32.3%) | 19.6 (17.4–22.0)          | 1459 (27.9%) | 23.6 (21.2–26.2)          | 1.10 (0.90–1.33)                       | 0.355   |
| Insurance coverage               |              |                           |              |                           |                                        |         |
| No                               | 2652 (74.5%) | 20.3 (18.6–22.1)          | 1950 (57.2%) | 18.7 (16.9–20.7)          | 1                                      |         |
| Yes                              | 1026 (25.5%) | 23.2 (20.4–26.4)          | 1720 (42.8%) | 26.4 (24.2–28.9)          | 1.18 (1.01–1.39)                       | 0.035   |
| Type of work                     |              |                           |              |                           |                                        |         |
| Unemployed                       | 951 (24.7%)  | 31.4 (28.1–34.9)          | 1483 (38.9%) | 29.9 (27.4–32.6)          | 1                                      |         |
| Casual                           | 674 (19.1%)  | 16.9 (13.9–20.4)          | 562 (14.1%)  | 13.8 (10.7–17.6)          | 0.47 (0.37–0.60)                       | <0.0001 |
| Self-employed                    | 1630 (45.2%) | 16.8 (14.9–18.9)          | 1464 (40.1%) | 17.4 (15.4–19.7)          | 0.61 (0.51–0.73)                       | <0.0001 |
| Government/private               | 423 (10.9%)  | 22.2 (18.0–27.1)          | 269 (7.0%)   | 21.0 (15.8–27.4)          | 0.60 (0.45–0.79)                       | <0.0001 |
| Per capita Household expenditure |              |                           |              |                           |                                        |         |
| Q1 (the lowest)                  | 728 (22.9%)  | 15.8 (13.0–18.9)          | 813 (25.2%)  | 13.5 (11.1–16.2)          | 1                                      |         |
| Q2                               | 785 (22.4%)  | 17.9 (15.1–21.2)          | 746 (21.4%)  | 18.9 (15.9–22.3)          | 1.28 (1.01–1.62)                       | 0.040   |
| Q3                               | 743 (20.1%)  | 20.5 (17.4–24.0)          | 757 (20.4%)  | 22.1 (18.9–25.7)          | 1.37 (1.08–1.74)                       | 0.009   |
| Q4                               | 744 (18.4%)  | 23.6 (20.3–27.3)          | 681 (17.2%)  | 25.3 (21.9–29.0)          | 1.84 (1.44–2.33)                       | <0.0001 |
| Q5 (the highest)                 | 678 (16.1%)  | 30.4 (26.5–34.7)          | 681 (15.8%)  | 36.2 (32.2–40.5)          | 2.22 (1.72–2.86)                       | <0.0001 |
| Residency                        |              |                           |              |                           |                                        |         |
| Rural                            | 1958 (63.4%) | 18.1 (16.3–20.1)          | 1682 (52.8%) | 16.9 (15.1–19.0)          | 1                                      |         |
| Urban                            | 1720 (36.6%) | 26.1 (23.8–28.6)          | 1996 (47.1%) | 27.7 (25.5–30.0)          | 1.41 (1.19–1.67)                       | <0.0001 |
| Region                           |              |                           |              |                           |                                        |         |
| Java-Bali                        | 2413 (77.5%) | 21.6 (19.9–23.5)          | 2417 (77.6%) | 21.1 (19.3–22.9)          | 1                                      |         |
| Sumatra                          | 691 (14.5%)  | 19.6 (16.7–22.8)          | 690 (14.5%)  | 26.6 (23.3–30.2)          | 1.06 (0.85–1.33)                       | 0.602   |
| Nusa Tenggara                    | 239 (2.4%)   | 14.5 (10.6–19.5)          | 239 (2.4%)   | 14.5 (10.5–19.6)          | 0.59 (0.40–0.87)                       | 0.008   |
| Kalimantan                       | 168 (1.8%)   | 17.9 (12.7–24.5)          | 168 (1.7%)   | 34.2 (27.4–41.7)          | 1.35 (0.92–1.98)                       | 0.129   |
| Sulawesi                         | 167 (3.8%)   | 19.6 (14.1–26.6)          | 164 (3.7%)   | 23.7 (17.6–31.0)          | 0.89 (0.59–1.34)                       | 0.569   |

a) Values are unweighted counts and weighted percentages unless otherwise indicated

b) We defined multimorbidity if the respondents reported that they had 2 or more chronic conditions related to NCDs. Chronic diseases included: hypertension, diabetes, asthma, heart attack/coronary heart diseases, liver disease, stroke, cancer, arthritis/rheumatism, hypercholesterolemia, and mental illness.

c) Adjusted odds ratio (aOR) was estimated using multilevel logistic regression model of 2007 and 2014 IFLS  
NCD: non-communicable disease

591

592

593 **Table 2. Descriptive summary of health service use-financial burden and**  
 594 **productivity outcomes by number of NCDs (2014 IFLS)**  
 595

|                                                      | No NCD            | 1 NCD             | 2 NCDs            | +3 NCDs           |
|------------------------------------------------------|-------------------|-------------------|-------------------|-------------------|
|                                                      | Mean (SD)         | Mean (SD)         | Mean (SD)         | Mean (SD)         |
| Overall (n, %)                                       | 1052 (100%)       | 1751 (100%)       | 627 (100%)        | 248 (100%)        |
| <b>Health service use</b>                            |                   |                   |                   |                   |
| <i>Outpatient services</i> <sup>a)</sup>             |                   |                   |                   |                   |
| Any visit (%; 95% CI)                                | 15.5% (13.3–17.9) | 21.7% (19.5–23.9) | 35.7% (31.7–40.0) | 55.9% (49.0–62.6) |
| Number of visits (mean, SD)                          | 0.24 ± 0.72       | 0.41 ± 1.1        | 0.78 ± 1.6        | 1.4 ± 2.1         |
| <i>Inpatient services</i> <sup>b)</sup>              |                   |                   |                   |                   |
| Any visit (%; 95% CI)                                | 3.3% (2.3–4.8)    | 4.6% (3.5–6.0)    | 8.3% (6.1–11.0)   | 20.8% (15.7–27.0) |
| Number of visits (mean, SD)                          | 0.04 ± 0.30       | 0.06 ± 0.31       | 0.14 ± 0.65       | 0.35 ± 0.96       |
| <b>Financial burden</b>                              |                   |                   |                   |                   |
| OOPE for outpatient care (mean, SD) <sup>a,c)</sup>  | \$17 ± 47         | \$17 ± 58         | \$15 ± 40         | \$60 ± 321        |
| OOPE for inpatient care (mean, SD) <sup>b,c)</sup>   | \$566 ± 1,880     | \$527 ± 2,115     | \$792 ± 1,706     | \$762 ± 1,421     |
| Annual Total OOPE (mean, SD)                         | \$295 ± 977       | \$292 ± 1,239     | \$336 ± 950       | \$968 ± 4,313     |
| <i>Catastrophic health expenditure (%; 95% CI)</i>   |                   |                   |                   |                   |
| >10% of total household expenditure                  | 5.0% (3.7–6.6)    | 6.9% (5.6–8.5)    | 10.3% (7.9–13.4)  | 12.5% (8.7–17.7)  |
| >25% of total household expenditure                  | 1.5% (0.6–2.5)    | 1.5% (0.9–2.3)    | 2.8% (1.6–4.8)    | 2.8% (1.3–6.3)    |
| >40% of total non-food expenditure                   | 1.8% (1.1–2.8)    | 2.7% (1.9–3.6)    | 4.0% (2.6–6.2)    | 3.6% (1.8–6.8)    |
| <b>Productivity loss</b>                             |                   |                   |                   |                   |
| <i>Labour participation (%; 95% CI)</i>              |                   |                   |                   |                   |
| 50-60 years <sup>d)</sup>                            | 84.3% (79.8–88.0) | 74.3% (69.3–78.8) | 72.3% (64.3–79.1) | 49.8% (36.7–62.9) |
| 61-70 years <sup>d)</sup>                            | 78.3% (74.0–82.1) | 65.2% (61.1–69.1) | 54.3% (47.1–61.3) | 42.8% (32.6–53.8) |
| 71+ years <sup>d)</sup>                              | 51.4% (44.7–58.1) | 45.0% (40.5–49.5) | 28.4% (21.6–36.3) | 17.3% (8.1–33.4)  |
| Number of days of primary activity missed (mean, SD) | 2.7 ± 6.0         | 3.6 ± 6.8         | 6.5 ± 9.8         | 10.1 ± 12.1       |
| Number of days lying in bed (mean, SD)               | 0.80 ± 3.4        | 0.99 ± 3.6        | 1.9 ± 6.0         | 2.4 ± 6.3         |

<sup>a)</sup> in the last four weeks

<sup>b)</sup> in the last 12 months

<sup>c)</sup> Out-of-pocket expenditure (OOPE) were only asked to those who utilised outpatient and/or inpatient services.

<sup>d)</sup> The percentages were calculated based on the total number of respondents by aged groups. Total respondents aged 50-60 years, 61-70 years and 71+ years are 966, 1592, and 1150 respondents.

OOPE medical expenses were converted to 2014 International Dollars (INT\$).

Bootstrapping with 400 times replications was performed to estimate the standard error and 95% CI.

596

597 **Table 3. The effect of multimorbidity on health service use**

| Variables                                  | Health service use      |              |                                |              |                         |              |                                |         |
|--------------------------------------------|-------------------------|--------------|--------------------------------|--------------|-------------------------|--------------|--------------------------------|---------|
|                                            | Outpatient              |              |                                |              | Inpatient               |              |                                |         |
|                                            | Any visit <sup>a)</sup> |              | Number of visits <sup>b)</sup> |              | Any visit <sup>a)</sup> |              | Number of visits <sup>b)</sup> |         |
| aOR (95% CI)                               | P values                | IRR (95% CI) | p values                       | aOR (95% CI) | p values                | IRR (95% CI) | p values                       |         |
| Number of NCDs (ref. no NCD)               |                         |              |                                |              |                         |              |                                |         |
| Single NCD                                 | 1.35 (1.15–1.58)        | <0.0001      | 1.45 (1.24–1.69)               | <0.0001      | 1.07 (0.78–1.48)        | 0.671        | 1.06 (0.75–1.50)               | 0.755   |
| Two NCDs                                   | 2.43 (2.00–2.95)        | <0.0001      | 2.45 (2.04–2.93)               | <0.0001      | 1.78 (1.23–2.57)        | 0.002        | 2.07 (1.39–3.08)               | <0.0001 |
| Three or more NCDs                         | 4.66 (3.55–6.11)        | <0.0001      | 4.25 (3.33–5.42)               | <0.0001      | 3.69 (2.35–5.79)        | <0.0001      | 3.68 (2.21–6.12)               | <0.0001 |
| Period (ref. 2007)                         |                         |              |                                |              |                         |              |                                |         |
| 2014                                       | 1.40 (1.22–1.61)        | <0.0001      | 1.46 (1.29–1.65)               | <0.0001      | 1.79 (1.36–2.36)        | <0.0001      | 2.20 (1.63–2.98)               | <0.0001 |
| Sex (ref. Male)                            |                         |              |                                |              |                         |              |                                |         |
| Female                                     | 1.26 (1.08–1.47)        | 0.003        | 1.20 (1.04–1.39)               | 0.013        | 0.93 (0.70–1.24)        | 0.626        | 0.85 (0.62–1.16)               | 0.300   |
| Age (ref. 50 – 60 years)                   |                         |              |                                |              |                         |              |                                |         |
| 61 – 70 years                              | 1.01 (0.86–1.18)        | 0.905        | 1.00 (0.87–1.16)               | 0.969        | 1.07 (0.78–1.45)        | 0.677        | 1.17 (0.84–1.65)               | 0.351   |
| 71+ years                                  | 1.10 (0.90–1.34)        | 0.351        | 1.06 (0.88–1.27)               | 0.567        | 1.49 (1.03–2.15)        | 0.034        | 1.66 (1.11–2.49)               | 0.014   |
| Marital status (ref. Not married)          |                         |              |                                |              |                         |              |                                |         |
| Currently married                          | 1.14 (0.97–1.34)        | 0.105        | 1.15 (0.99–1.34)               | 0.069        | 1.04 (0.77–1.40)        | 0.815        | 0.98 (0.71–1.37)               | 0.914   |
| Educational level (ref. No education)      |                         |              |                                |              |                         |              |                                |         |
| Primary                                    | 1.06 (0.90–1.25)        | 0.496        | 0.96 (0.82–1.13)               | 0.629        | 1.09 (0.80–1.50)        | 0.578        | 0.97 (0.69–1.38)               | 0.882   |
| Junior high school                         | 1.04 (0.80–1.35)        | 0.786        | 1.00 (0.78–1.28)               | 0.993        | 1.23 (0.78–1.95)        | 0.368        | 1.48 (0.90–2.42)               | 0.120   |
| Senior high school                         | 1.05 (0.81–1.36)        | 0.706        | 0.91 (0.71–1.17)               | 0.473        | 0.91 (0.57–1.46)        | 0.699        | 0.82 (0.49–1.37)               | 0.448   |
| Tertiary                                   | 1.29 (0.90–1.84)        | 0.167        | 0.93 (0.66–1.32)               | 0.697        | 0.98 (0.53–1.80)        | 0.937        | 0.85 (0.42–1.69)               | 0.640   |
| Ethnicity (ref. Javanese)                  |                         |              |                                |              |                         |              |                                |         |
| Sundanese                                  | 0.92 (0.74–1.14)        | 0.464        | 0.95 (0.77–1.16)               | 0.617        | 0.90 (0.61–1.34)        | 0.609        | 1.14 (0.75–1.76)               | 0.536   |
| Others                                     | 1.06 (0.89–1.25)        | 0.525        | 0.99 (0.84–1.16)               | 0.877        | 0.90 (0.65–1.23)        | 0.495        | 1.08 (0.76–1.52)               | 0.676   |
| Insurance coverage (ref. No)               |                         |              |                                |              |                         |              |                                |         |
| Yes                                        | 1.48 (1.28–1.70)        | <0.0001      | 1.51 (1.32–1.72)               | <0.0001      | 1.90 (1.45–2.50)        | <0.0001      | 1.65 (1.23–2.21)               | 0.001   |
| Type of work (ref. Unemployed)             |                         |              |                                |              |                         |              |                                |         |
| Casual                                     | 0.76 (0.62–0.95)        | 0.014        | 0.69 (0.57–0.85)               | <0.0001      | 0.49 (0.31–0.78)        | 0.003        | 0.44 (0.27–0.73)               | 0.001   |
| Self-employed                              | 0.85 (0.73–1.00)        | 0.056        | 0.82 (0.70–0.95)               | 0.008        | 0.60 (0.44–0.82)        | 0.001        | 0.60 (0.43–0.83)               | 0.002   |
| Government/private                         | 0.75 (0.58–0.96)        | 0.025        | 0.72 (0.57–0.92)               | 0.008        | 0.63 (0.39–1.04)        | 0.071        | 0.77 (0.46–1.31)               | 0.335   |
| Per capita household expenditure (ref. Q1) |                         |              |                                |              |                         |              |                                |         |
| Q2                                         | 1.50 (1.21–1.86)        | <0.0001      | 1.50 (1.23–1.84)               | <0.0001      | 1.25 (0.81–1.92)        | 0.307        | 1.07 (0.67–1.70)               | 0.777   |
| Q3                                         | 1.76 (1.42–2.18)        | <0.0001      | 1.74 (1.42–2.13)               | <0.0001      | 1.64 (1.08–2.49)        | 0.020        | 1.71 (1.10–2.66)               | 0.018   |
| Q4                                         | 1.73 (1.38–2.15)        | <0.0001      | 1.80 (1.46–2.21)               | <0.0001      | 1.42 (0.91–2.20)        | 0.121        | 1.36 (0.86–2.18)               | 0.192   |
| Q5                                         | 1.90 (1.51–2.40)        | <0.0001      | 2.09 (1.68–2.59)               | <0.0001      | 2.48 (1.60–3.85)        | <0.0001      | 2.52 (1.59–4.00)               | <0.0001 |
| Residency (ref. Rural)                     |                         |              |                                |              |                         |              |                                |         |
| Urban                                      | 0.92 (0.80–1.07)        | 0.283        | 0.95 (0.83–1.10)               | 0.500        | 0.96 (0.72–1.26)        | 0.744        | 1.05 (0.78–1.42)               | 0.726   |
| Region (ref. Java-Bali)                    |                         |              |                                |              |                         |              |                                |         |
| Sumatra                                    | 0.83 (0.68–1.00)        | 0.052        | 0.98 (0.81–1.17)               | 0.798        | 1.23 (0.87–1.74)        | 0.236        | 1.25 (0.86–1.82)               | 0.250   |
| Nusa Tenggara                              | 0.64 (0.46–0.89)        | 0.007        | 0.60 (0.43–0.82)               | 0.002        | 1.25 (0.71–2.18)        | 0.437        | 1.11 (0.60–2.03)               | 0.745   |
| Kalimantan                                 | 1.03 (0.74–1.43)        | 0.873        | 1.21 (0.89–1.65)               | 0.228        | 1.09 (0.58–2.05)        | 0.799        | 0.94 (0.47–1.89)               | 0.865   |
| Sulawesi                                   | 0.64 (0.45–0.93)        | 0.019        | 0.63 (0.44–0.90)               | 0.011        | 0.63 (0.30–1.35)        | 0.235        | 0.63 (0.29–1.38)               | 0.249   |

a) Multilevel logistic regression model

b) Multilevel negative binomial regression model

aOR: adjusted odds ratio, IRR: Incidence rate ratio, NCD: non-communicable disease

598



599 **Table 4. The effect of multimorbidity on catastrophic expenditure**

| Variables                                  | Catastrophic health expenditure                  |          |                                                  |          |                                           |          |
|--------------------------------------------|--------------------------------------------------|----------|--------------------------------------------------|----------|-------------------------------------------|----------|
|                                            | 10% of total household expenditure <sup>a)</sup> |          | 25% of total household expenditure <sup>a)</sup> |          | 40% of non-food expenditure <sup>a)</sup> |          |
|                                            | aOR (95% CI)                                     | p values | aOR (95% CI)                                     | p values | aOR (95% CI)                              | p values |
| Number of NCDs (ref. no NCD)               |                                                  |          |                                                  |          |                                           |          |
| Single NCD                                 | 1.11 (0.76–1.62)                                 | 0.591    | 0.81 (0.49–1.34)                                 | 0.417    | 0.86 (0.52–1.43)                          | 0.561    |
| Two NCDs                                   | 1.58 (1.06–2.35)                                 | 0.026    | 1.39 (0.79–2.45)                                 | 0.250    | 1.27 (0.69–2.35)                          | 0.437    |
| Three or more NCDs                         | 1.69 (1.02–2.81)                                 | 0.042    | 0.96 (0.40–2.34)                                 | 0.937    | 0.72 (0.27–1.89)                          | 0.503    |
| Period (ref. 2007)                         |                                                  |          |                                                  |          |                                           |          |
| 2014                                       | 1.42 (1.12–1.80)                                 | 0.003    | 1.27 (0.83–1.95)                                 | 0.271    | 1.18 (0.77–1.80)                          | 0.442    |
| Sex (ref. Male)                            |                                                  |          |                                                  |          |                                           |          |
| Female                                     | 0.89 (0.64–1.23)                                 | 0.480    | 0.90 (0.57–1.42)                                 | 0.645    | 0.83 (0.52–1.33)                          | 0.432    |
| Age (ref. 50 – 60 years)                   |                                                  |          |                                                  |          |                                           |          |
| 61 – 70 years                              | 1.15 (0.79–1.69)                                 | 0.461    | 1.46 (0.90–2.36)                                 | 0.125    | 1.43 (0.85–2.38)                          | 0.175    |
| 71+ years                                  | 1.13 (0.66–1.92)                                 | 0.663    | 1.01 (0.51–2.01)                                 | 0.975    | 1.24 (0.60–2.55)                          | 0.563    |
| Marital status (ref. Not married)          |                                                  |          |                                                  |          |                                           |          |
| Currently married                          | 1.59 (1.22 – 2.09)                               | 0.001    | 1.68 (0.98–2.87)                                 | 0.060    | 1.83 (1.01–3.33)                          | 0.047    |
| Educational level (ref. No education)      |                                                  |          |                                                  |          |                                           |          |
| Primary                                    | 0.96 (0.67–1.38)                                 | 0.841    | 0.90 (0.52–1.55)                                 | 0.708    | 0.85 (0.48–1.52)                          | 0.589    |
| Junior high school                         | 0.97 (0.64–1.47)                                 | 0.902    | 1.21 (0.58–2.55)                                 | 0.610    | 0.60 (0.25–1.48)                          | 0.271    |
| Senior high school                         | 0.93 (0.61–1.42)                                 | 0.735    | 1.22 (0.59–2.52)                                 | 0.595    | 0.81 (0.34–1.92)                          | 0.627    |
| Tertiary                                   | 0.45 (0.22–0.90)                                 | 0.023    | 0.11 (0.01–0.94)                                 | 0.043    | 0.12 (0.02–0.84)                          | 0.032    |
| Ethnicity (ref. Javanese)                  |                                                  |          |                                                  |          |                                           |          |
| Sundanese                                  | 0.87 (0.62–1.23)                                 | 0.433    | 1.80 (0.98–3.33)                                 | 0.060    | 1.14 (0.52–2.48)                          | 0.748    |
| Others                                     | 0.76 (0.56–1.02)                                 | 0.065    | 1.01 (0.58–1.78)                                 | 0.959    | 0.56 (0.28–1.09)                          | 0.088    |
| Insurance coverage (ref. No)               |                                                  |          |                                                  |          |                                           |          |
| Yes                                        | 0.89 (0.67–1.20)                                 | 0.451    | 0.83 (0.53–1.31)                                 | 0.425    | 0.80 (0.49–1.32)                          | 0.390    |
| Type of work (ref. Unemployed)             |                                                  |          |                                                  |          |                                           |          |
| Casual                                     | 0.59 (0.33–1.07)                                 | 0.082    | 0.58 (0.29–1.17)                                 | 0.128    | 0.41 (0.20–0.84)                          | 0.015    |
| Self-employed                              | 0.60 (0.36–1.01)                                 | 0.056    | 0.58 (0.35–0.96)                                 | 0.033    | 0.45 (0.27–0.76)                          | 0.003    |
| Government/private                         | 0.58 (0.34–1.02)                                 | 0.058    | 0.78 (0.35–1.70)                                 | 0.527    | 0.39 (0.16–0.95)                          | 0.038    |
| Per capita household expenditure (ref. Q1) |                                                  |          |                                                  |          |                                           |          |
| Q2                                         | 1.04 (0.071– 1.52)                               | 0.834    | 1.60 (0.71–3.57)                                 | 0.257    | 1.34 (0.62–2.90)                          | 0.459    |
| Q3                                         | 1.37 (0.97–1.95)                                 | 0.076    | 1.71 (0.77–3.80)                                 | 0.188    | 1.19 (0.54–2.61)                          | 0.669    |
| Q4                                         | 1.98 (1.40–2.81)                                 | <0.0001  | 3.11 (1.43–6.76)                                 | 0.004    | 2.73 (1.23–6.03)                          | 0.013    |
| Q5                                         | 3.13 (2.28–4.31)                                 | <0.0001  | 5.91 (2.72–12.85)                                | <0.0001  | 8.45 (3.70–19.32)                         | <0.0001  |
| Residency (ref. Rural)                     |                                                  |          |                                                  |          |                                           |          |
| Urban                                      | 0.94 (0.61–1.45)                                 | 0.785    | 0.76 (0.46–1.24)                                 | 0.273    | 0.75 (0.43–1.31)                          | 0.309    |
| Region (ref. Java-Bali)                    |                                                  |          |                                                  |          |                                           |          |
| Sumatra                                    | 0.78 (0.56–1.09)                                 | 0.146    | 0.73 (0.38–1.38)                                 | 0.328    | 1.08 (0.52–2.24)                          | 0.846    |
| Nusa Tenggara                              | 0.64 (0.34 – 1.21)                               | 0.175    | 0.98 (0.32–2.99)                                 | 0.968    | 0.93 (0.22–3.83)                          | 0.917    |
| Kalimantan                                 | 0.78 (0.39–1.52)                                 | 0.460    | 0.64 (0.19–2.24)                                 | 0.488    | 0.64 (0.15–2.77)                          | 0.548    |
| Sulawesi                                   | 0.80 (0.43–1.48)                                 | 0.478    | 1.21 (0.41–3.57)                                 | 0.724    | 1.31 (0.33–5.17)                          | 0.701    |

<sup>a)</sup> Multilevel logistic regression model

aOR: adjusted odds ratio, NCD: non-communicable disease



601 **Table 5. The effect of multimorbidity on productivity loss**

| Variables                                  | Productivity loss                  |          |                                            |          |                                  |          |
|--------------------------------------------|------------------------------------|----------|--------------------------------------------|----------|----------------------------------|----------|
|                                            | Labour participation <sup>a)</sup> |          | Days primary activity missed <sup>b)</sup> |          | Days stayed in bed <sup>b)</sup> |          |
|                                            | aOR (95% CI)                       | p values | IRR (95% CI)                               | p values | IRR (95% CI)                     | p values |
| Number of NCDs (ref. no NCD)               |                                    |          |                                            |          |                                  |          |
| Single NCD                                 | 0.65 (0.54–0.79)                   | <0.0001  | 1.25 (1.08–1.43)                           | 0.002    | 1.09 (0.84–1.43)                 | 0.509    |
| Two NCDs                                   | 0.45 (0.35–0.57)                   | <0.0001  | 1.90 (1.58–2.29)                           | <0.0001  | 1.87 (1.33–2.61)                 | <0.0001  |
| Three or more NCDs                         | 0.23 (0.16–0.33)                   | <0.0001  | 2.59 (1.97–3.41)                           | <0.0001  | 2.64 (1.60–4.36)                 | <0.0001  |
| Period (ref. 2007)                         |                                    |          |                                            |          |                                  |          |
| 2014                                       | 0.69 (0.59–0.81)                   | <0.0001  | 1.66 (1.46–1.88)                           | <0.0001  | 1.79 (1.40–2.29)                 | <0.0001  |
| Sex (ref. Male)                            |                                    |          |                                            |          |                                  |          |
| Female                                     | 0.21 (0.17–0.26)                   | <0.0001  | 0.99 (0.86–1.14)                           | 0.912    | 0.92 (0.70–1.21)                 | 0.567    |
| Age (ref. 50 – 60 years)                   |                                    |          |                                            |          |                                  |          |
| 61 – 70 years                              | 0.37 (0.31–0.45)                   | <0.0001  | 0.99 (0.86–1.14)                           | 0.859    | 1.07 (0.81–1.41)                 | 0.617    |
| 71+ years                                  | 0.10 (0.07–0.13)                   | <0.0001  | 1.20 (1.00–1.44)                           | 0.047    | 1.93 (1.37–2.72)                 | <0.0001  |
| Marital status (ref. Not married)          |                                    |          |                                            |          |                                  |          |
| Currently married                          | 1.51 (1.23–1.84)                   | <0.0001  | 1.13 (0.98–1.31)                           | 0.089    | 0.88 (0.67–1.17)                 | 0.395    |
| Educational level (ref. No education)      |                                    |          |                                            |          |                                  |          |
| Primary                                    | 0.89 (0.71–1.11)                   | 0.305    | 0.92 (0.79–1.07)                           | 0.263    | 1.00 (0.75–1.33)                 | 0.999    |
| Junior high school                         | 0.41 (0.29–0.57)                   | <0.0001  | 0.94 (0.74–1.20)                           | 0.631    | 0.87 (0.54–1.40)                 | 0.570    |
| Senior high school                         | 0.41 (0.29–0.58)                   | <0.0001  | 0.68 (0.53–0.87)                           | 0.002    | 0.81 (0.51–1.28)                 | 0.362    |
| Tertiary                                   | 0.51 (0.31–0.82)                   | 0.006    | 0.54 (0.38–0.78)                           | 0.001    | 0.37 (0.18–0.78)                 | 0.009    |
| Ethnicity (ref. Javanese)                  |                                    |          |                                            |          |                                  |          |
| Sundanese                                  | 0.50 (0.37–0.67)                   | <0.0001  | 1.35 (1.11–1.65)                           | 0.003    | 1.28 (0.89–1.85)                 | 0.179    |
| Others                                     | 0.77 (0.61–0.98)                   | 0.033    | 1.11 (0.95–1.30)                           | 0.188    | 1.12 (0.84–1.49)                 | 0.436    |
| Insurance coverage (ref. No)               |                                    |          |                                            |          |                                  |          |
| Yes                                        | 0.85 (0.72–1.01)                   | 0.071    | 1.08 (0.95–1.22)                           | 0.258    | 1.05 (0.82–1.34)                 | 0.704    |
| Type of work (ref. Unemployed)             |                                    |          |                                            |          |                                  |          |
| Casual                                     | N/A                                | N/A      | 0.62 (0.51–0.75)                           | <0.0001  | 0.32 (0.22–0.47)                 | <0.0001  |
| Self-employed                              | N/A                                | N/A      | 0.62 (0.53–0.71)                           | <0.0001  | 0.42 (0.32–0.56)                 | <0.0001  |
| Government/private                         | N/A                                | N/A      | 0.57 (0.45–0.72)                           | <0.0001  | 0.45 (0.28–0.73)                 | 0.001    |
| Per capita household expenditure (ref. Q1) |                                    |          |                                            |          |                                  |          |
| Q2                                         | 1.37 (1.08–1.75)                   | 0.011    | 1.03 (0.86–1.23)                           | 0.744    | 1.05 (0.74–1.49)                 | 0.769    |
| Q3                                         | 1.33 (1.03–1.71)                   | 0.028    | 1.15 (0.96–1.38)                           | 0.130    | 1.06 (0.75–1.50)                 | 0.737    |
| Q4                                         | 1.12 (0.87–1.46)                   | 0.379    | 1.05 (0.87–1.27)                           | 0.627    | 1.02 (0.71–1.46)                 | 0.914    |
| Q5                                         | 1.34 (1.01–1.77)                   | 0.043    | 1.29 (1.05–1.58)                           | 0.015    | 0.92 (0.63–1.35)                 | 0.668    |
| Residency (ref. Rural)                     |                                    |          |                                            |          |                                  |          |
| Urban                                      | 0.44 (0.35–0.54)                   | <0.0001  | 0.93 (0.81–1.07)                           | 0.296    | 0.70 (0.54–0.89)                 | 0.004    |
| Region (ref. Java-Bali)                    |                                    |          |                                            |          |                                  |          |
| Sumatra                                    | 0.95 (0.73–1.25)                   | 0.735    | 1.13 (0.94–1.36)                           | 0.194    | 1.01 (0.73–1.40)                 | 0.956    |
| Nusa Tenggara                              | 0.74 (0.48–1.14)                   | 0.177    | 0.90 (0.68–1.20)                           | 0.472    | 1.14 (0.67–1.93)                 | 0.638    |
| Kalimantan                                 | 1.21 (0.75–1.94)                   | 0.440    | 0.90 (0.67–1.22)                           | 0.511    | 0.89 (0.51–1.57)                 | 0.688    |
| Sulawesi                                   | 0.39 (0.24–0.62)                   | <0.0001  | 0.99 (0.72–1.36)                           | 0.948    | 0.94 (0.53–1.69)                 | 0.845    |

a) Multilevel logistic regression model

b) Multilevel negative binomial regression model

aOR: adjusted odds ratio, IRR: incidence rate ratio, NCD: non-communicable disease

602

603 **Figure 1. Prevalence of multimorbidity by age group and per capita household**  
 604 **expenditure**

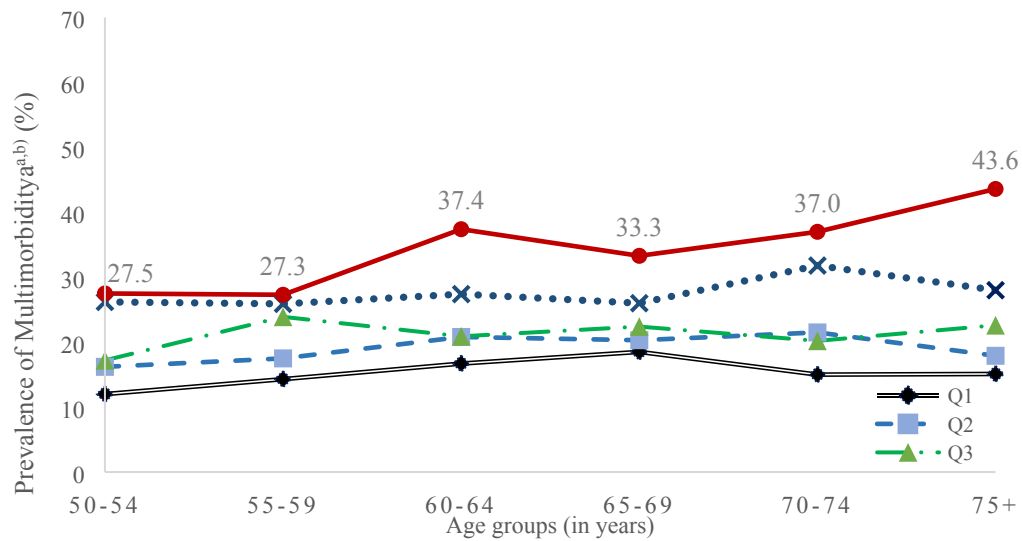

605  
 606  
 607 a) respondents who reported that they had 2 or more chronic conditions related to non-communicable  
 608 diseases (NCDs). b) Pooled sample of Wave 4 and Wave 5. Q1-Q5 refer to household expenditure  
 609 quintiles, where Q1 is the lowest and Q5 the highest household expenditure quintile.  
 610

611 **Figure S1. Sample flowchart**

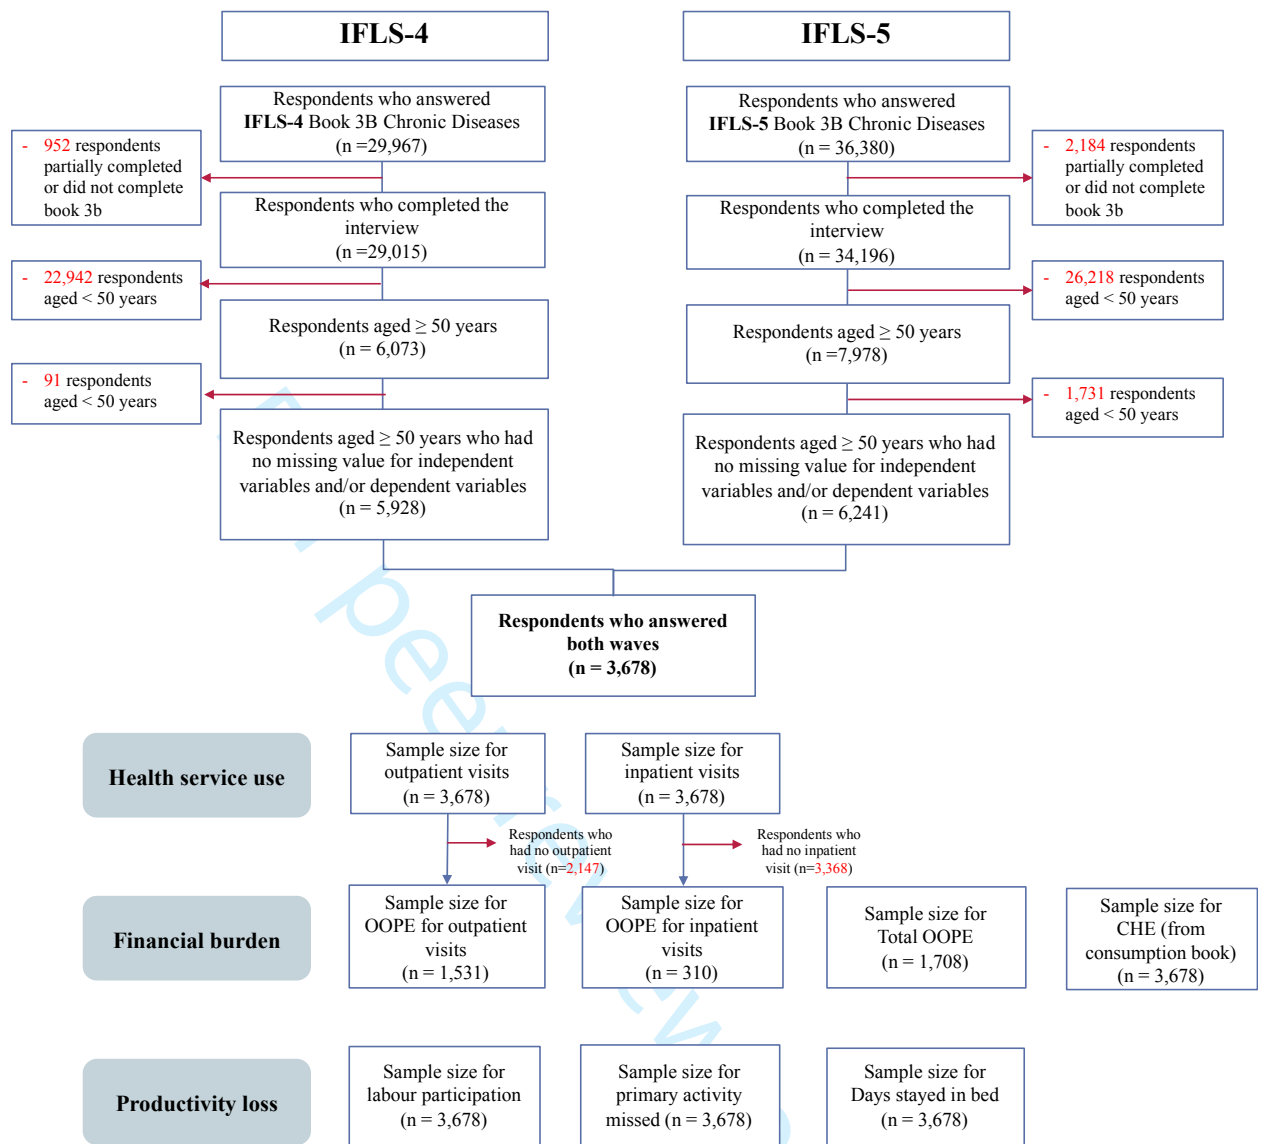

612

613 **Table S1. STROBE Statement**

|                           | Item | Recommendation                                                                                                                                                                                                                                                                                                                                                                                                                                                         | Reported on page | Relevant text from manuscript                                                                                                                                                     |
|---------------------------|------|------------------------------------------------------------------------------------------------------------------------------------------------------------------------------------------------------------------------------------------------------------------------------------------------------------------------------------------------------------------------------------------------------------------------------------------------------------------------|------------------|-----------------------------------------------------------------------------------------------------------------------------------------------------------------------------------|
| <b>Title and abstract</b> | 1    | (a) Indicate the study's design with a commonly used term in the title or the abstract                                                                                                                                                                                                                                                                                                                                                                                 | 2                | "Panel Data Analysis"                                                                                                                                                             |
|                           |      | (b) Provide in the abstract an informative and balanced summary of what was done and what was found                                                                                                                                                                                                                                                                                                                                                                    | 3                | "Multimorbidity is associated with substantial direct and indirect costs to individuals, households, and the wider society."                                                      |
| <b>Introduction</b>       |      |                                                                                                                                                                                                                                                                                                                                                                                                                                                                        |                  |                                                                                                                                                                                   |
| Background/rationale      | 2    | Explain the scientific background and rationale for the investigation being reported                                                                                                                                                                                                                                                                                                                                                                                   | 4, 5             | "Evidence from high-income countries (HICs) has found that..."                                                                                                                    |
| Objectives                | 3    | State specific objectives, including any prespecified hypotheses                                                                                                                                                                                                                                                                                                                                                                                                       | 5,6              | "to examine multimorbidity levels, and their relation to households' socioeconomic characteristics, health service use, catastrophic health expenditures, and productivity loss." |
| <b>Methods</b>            |      |                                                                                                                                                                                                                                                                                                                                                                                                                                                                        |                  |                                                                                                                                                                                   |
| Study design              | 4    | Present key elements of study design early in the paper                                                                                                                                                                                                                                                                                                                                                                                                                | 6                | "The study used panel data from two waves of the Indonesian Family Life Survey (IFLS)."                                                                                           |
| Setting                   | 5    | Describe the setting, locations, and relevant dates, including periods of recruitment, exposure, follow-up, and data collection                                                                                                                                                                                                                                                                                                                                        | 6                | "Waves 5 was conducted between September 2014–March 2015."                                                                                                                        |
| Participants              | 6    | (a) <i>Cohort study</i> —Give the eligibility criteria, and the sources and methods of selection of participants. Describe methods of follow-up<br><i>Case-control study</i> —Give the eligibility criteria, and the sources and methods of case ascertainment and control selection. Give the rationale for the choice of cases and controls<br><i>Cross-sectional study</i> —Give the eligibility criteria, and the sources and methods of selection of participants | 6                | "We included respondents aged 50 years and above in 2014, excluded those who did not participate in both Waves 4 and 5, and those with missing values for the study variable."    |
|                           |      | (b) <i>Cohort study</i> —For matched studies, give matching criteria and number of exposed and unexposed<br><i>Case-control study</i> —For matched studies, give matching criteria and the number of controls per case                                                                                                                                                                                                                                                 |                  | N/A                                                                                                                                                                               |
| Variables                 | 7    | Clearly define all outcomes, exposures, predictors, potential confounders, and effect modifiers. Give diagnostic criteria, if applicable                                                                                                                                                                                                                                                                                                                               | 7–9              | In "variables" subsection.                                                                                                                                                        |
| Data sources/             | 8*   | For each variable of interest, give sources of data and details of methods of assessment (measurement). Describe comparability of                                                                                                                                                                                                                                                                                                                                      | 7–9              | In "variables" subsection. Details of the                                                                                                                                         |

|                                                                                                                      | <b>Item</b>            | <b>Recommendation</b>                                                                                                                                                                                                                                                                                     | <b>Reported on page</b> | <b>Relevant text from manuscript</b>                                                                                                                                                                                       |
|----------------------------------------------------------------------------------------------------------------------|------------------------|-----------------------------------------------------------------------------------------------------------------------------------------------------------------------------------------------------------------------------------------------------------------------------------------------------------|-------------------------|----------------------------------------------------------------------------------------------------------------------------------------------------------------------------------------------------------------------------|
| 1<br>2<br>3<br>4<br>5<br>6<br>7<br>8<br>9<br>10<br>11<br>12<br>13<br>14<br>15<br>16<br>17                            | measurement            | assessment methods if there is more than one group                                                                                                                                                                                                                                                        |                         | measurements are available in Table S2                                                                                                                                                                                     |
| 18<br>19<br>20<br>21<br>22<br>23<br>24<br>25<br>26<br>27<br>28<br>29<br>30<br>31                                     | Bias                   | 9 Describe any efforts to address potential sources of bias                                                                                                                                                                                                                                               | 10                      | “Taking into account the hierarchical (nested) nature of the dataset (i.e. observations nested within individuals, and individuals nested within households, and districts), a multilevel level model approach was used.”  |
| 32<br>33<br>34<br>35<br>36<br>37<br>38<br>39<br>40<br>41<br>42<br>43<br>44<br>45<br>46<br>47<br>48<br>49<br>50<br>51 | Study size             | 10 Explain how the study size was arrived at                                                                                                                                                                                                                                                              | 10                      | Our final sample is 3,678 respondents (the sample flowchart is presented in Figure S1).                                                                                                                                    |
| 52<br>53<br>54<br>55<br>56<br>57<br>58<br>59<br>60                                                                   | Quantitative variables | 11 Explain how quantitative variables were handled in the analyses. If applicable, describe which groupings were chosen and why                                                                                                                                                                           | 7                       | In “variables” subsection, i.e. “A total of 10 NCDs were used to quantify the number of NCDs (0, 1, 2, 3 or more) and respondents with two or more NCDs were categorized as having multimorbidity (categorized as 0 or 1)” |
|                                                                                                                      | Statistical methods    | 12 (a) Describe all statistical methods, including those used to control for confounding                                                                                                                                                                                                                  | 10                      | In “statistical analysis” subsection. For example “..., adjusting for covariates”                                                                                                                                          |
|                                                                                                                      |                        | (b) Describe any methods used to examine subgroups and interactions                                                                                                                                                                                                                                       | 10                      | “We described the patterns of multimorbidity across different population subgroups...”                                                                                                                                     |
|                                                                                                                      |                        | (c) Explain how missing data were addressed                                                                                                                                                                                                                                                               | 7                       | “...excluded those who did not participate in both Waves 4 and 5, and those with missing values for the study”                                                                                                             |
|                                                                                                                      |                        | (d) <i>Cohort study</i> —If applicable, explain how loss to follow-up was addressed<br><i>Case-control study</i> —If applicable, explain how matching of cases and controls was addressed<br><i>Cross-sectional study</i> —If applicable, describe analytical methods taking account of sampling strategy | 7                       | “...excluded those who did not participate in both Waves 4 and 5, and those with missing values for the study”                                                                                                             |
|                                                                                                                      |                        | (e) Describe any sensitivity analyses                                                                                                                                                                                                                                                                     | 10                      | “We conducted two robustness analyses.”                                                                                                                                                                                    |
|                                                                                                                      | <b>Results</b>         |                                                                                                                                                                                                                                                                                                           |                         |                                                                                                                                                                                                                            |
|                                                                                                                      | Participants           | 13* (a) Report numbers of individuals at each stage of study—eg numbers potentially eligible, examined for eligibility, confirmed eligible, included in the study, completing follow-up, and analysed                                                                                                     | 32                      | Figure S1: Sampling flow chart                                                                                                                                                                                             |

|                   | <b>Item</b> | <b>Recommendation</b>                                                                                                                                                                                        | <b>Reported on page</b> | <b>Relevant text from manuscript</b>                                                                                                                                                                            |
|-------------------|-------------|--------------------------------------------------------------------------------------------------------------------------------------------------------------------------------------------------------------|-------------------------|-----------------------------------------------------------------------------------------------------------------------------------------------------------------------------------------------------------------|
|                   |             | (b) Give reasons for non-participation at each stage                                                                                                                                                         | 32                      | Figure S1: Sampling flow chart                                                                                                                                                                                  |
|                   |             | (c) Consider use of a flow diagram                                                                                                                                                                           | 32                      | Figure S1: Sampling flow chart                                                                                                                                                                                  |
| Descriptive data  | 14*         | (a) Give characteristics of study participants (eg demographic, clinical, social) and information on exposures and potential confounders                                                                     | 32                      | Figure S1: Sampling flow chart                                                                                                                                                                                  |
|                   |             | (b) Indicate number of participants with missing data for each variable of interest                                                                                                                          | 32                      | Figure S1: Sampling flow chart                                                                                                                                                                                  |
|                   |             | (c) <i>Cohort study</i> —Summarise follow-up time (eg, average and total amount)                                                                                                                             | 32                      | Figure S1: Sampling flow chart                                                                                                                                                                                  |
| Outcome data      | 15*         | <i>Cohort study</i> —Report numbers of outcome events or summary measures over time                                                                                                                          | 26                      | Table 1 and Table 2                                                                                                                                                                                             |
|                   |             | <i>Case-control study</i> —Report numbers in each exposure category, or summary measures of exposure                                                                                                         |                         | N/A                                                                                                                                                                                                             |
|                   |             | <i>Cross-sectional study</i> —Report numbers of outcome events or summary measures                                                                                                                           |                         |                                                                                                                                                                                                                 |
| Main results      | 16          | (a) Give unadjusted estimates and, if applicable, confounder-adjusted estimates and their precision (eg, 95% confidence interval). Make clear which confounders were adjusted for and why they were included | 27–30                   | Table 2 – Table 5. For example, “Respondents with a single NCD were 1.61 times more likely (95% CI 1.21–2.14) to have experienced an outpatient visit in the past four weeks compared to those without an NCD.” |
|                   |             | (b) Report category boundaries when continuous variables were categorized                                                                                                                                    | 37–38                   | Table S2: List of variables for 2007 and 2014 IFLS analyses                                                                                                                                                     |
|                   |             | (c) If relevant, consider translating estimates of relative risk into absolute risk for a meaningful time period                                                                                             |                         | N/A                                                                                                                                                                                                             |
| Other analyses    | 17          | Report other analyses done—eg analyses of subgroups and interactions, and sensitivity analyses                                                                                                               | 42–47                   | Tables S6–11. For example, “Our robustness analysis using cross-sectional analysis using 2014 cross-sectional dataset that consists of 14 physical NCDs (Tables S6–8) showed consistent results”                |
| <b>Discussion</b> |             |                                                                                                                                                                                                              |                         |                                                                                                                                                                                                                 |

|  | <b>Item</b>              | <b>Recommendation</b>                                                                                                                                                         | <b>Reported on page</b> | <b>Relevant text from manuscript</b>                                                                                                                                                     |
|--|--------------------------|-------------------------------------------------------------------------------------------------------------------------------------------------------------------------------|-------------------------|------------------------------------------------------------------------------------------------------------------------------------------------------------------------------------------|
|  | Key results              | 18 Summarise key results with reference to study objectives                                                                                                                   | 16                      | “Multimorbidity was associated with higher use of healthcare services, higher probability of catastrophic health expenditure, and a reduction in productivity.”                          |
|  | Limitations              | 19 Discuss limitations of the study, taking into account sources of potential bias or imprecision. Discuss both direction and magnitude of any potential bias                 | 18–19                   | “There are several limitations to our study.”                                                                                                                                            |
|  | Interpretation           | 20 Give a cautious overall interpretation of results considering objectives, limitations, multiplicity of analyses, results from similar studies, and other relevant evidence | 18–19                   | “Our findings should be interpreted with causation since the assessment of chronic diseases was mostly based on self-reporting and may cause under- or over-reporting of the prevalence” |
|  | Generalisability         | 21 Discuss the generalisability (external validity) of the study results                                                                                                      | 19                      | “This research intentionally focused on the older population due to a significantly higher burden of NCDs in this population group.”                                                     |
|  | <b>Other information</b> |                                                                                                                                                                               |                         |                                                                                                                                                                                          |
|  | Funding                  | 22 Give the source of funding and the role of the funders for the present study and, if applicable, for the original study on which the present article is based              | 20                      | Funding<br>“This research received no specific grant from any funding agency in the public, commercial or not-for-profit sectors”                                                        |

614

615

616 **Table S2. List of variables for 2007 & 2014 IFLS analysis**

| Variables                          | Type                | Measurement                                        | Source of measurement                                                                                                                                                                    |
|------------------------------------|---------------------|----------------------------------------------------|------------------------------------------------------------------------------------------------------------------------------------------------------------------------------------------|
| <b>Dependent variables:</b>        |                     |                                                    |                                                                                                                                                                                          |
| 1) Health service use              |                     |                                                    |                                                                                                                                                                                          |
| Outpatient care                    | Binary              | 0. No<br>1. Yes                                    | RJ00: In the last 4 weeks have you visited a public hospital- <i>puskesmas</i> -private hospital-clinic-health worker or doctor's practice or been visited by a health worker or doctor? |
|                                    | Numerical           | Number of days                                     | RJ02: How many times did you visit / been visited by [...] during the last 4 weeks?                                                                                                      |
| Inpatient care                     | Binary              | 0. No<br>1. Yes                                    | RN00: During the past 12 months have you ever received patient care at a hospital- <i>puskesmas</i> -clinic-or other?                                                                    |
|                                    | Numerical           | Number of days                                     | RN02: How many times have you received inpatient care at [...] during the past 12 months?                                                                                                |
| 2) Productivity loss               |                     |                                                    |                                                                                                                                                                                          |
| Labour participation               | Binary              | 0. No<br>1. Yes                                    | TK06a: Did you work/try to work/help to earn income for pay for at least 1 hour during the past week?                                                                                    |
|                                    | Numerical           | Number of days                                     |                                                                                                                                                                                          |
| Activity missed due to poor health | Numerical           | Number of days                                     | KK02a: During the last 4 weeks-how many days of your primary daily activities did you miss due to poor health?                                                                           |
| Stayed in bed                      | Numerical           | Number of days                                     | KK02b: In the last 4 weeks-how many days have you stayed in bed due to poor health?                                                                                                      |
| 3) Financial burden                |                     |                                                    |                                                                                                                                                                                          |
| OOPE of outpatient care            | Numerical           | International Dollars                              | RJ02b: How much did you pay out of pocket for outpatient care at [...] during the past 4 weeks?                                                                                          |
| OOPE of inpatient care             | Numerical           | International Dollars                              | RN02b: How much did you pay out of pocket for inpatient care at [...] during the past 12 months?                                                                                         |
| Annual Total OOPE                  | Numerical           | International Dollars                              | Annual total OOPE for outpatient and inpatient visits                                                                                                                                    |
| Catastrophic health expenditure    | Binary              | 0. No<br>1. Yes                                    | Book KS:<br>"How much money spent by all household members for medical costs during the past year?"                                                                                      |
| <b>Main independent variable</b>   |                     |                                                    |                                                                                                                                                                                          |
| Number of NCDs                     | Numerical           | Total number of chronic conditions related to NCDs | Book IIIB:<br>CD06a – CD06r: Have a doctor/paramedic/nurse/ midwife ever told you that you had [list of chronic diseases]                                                                |
|                                    | Categorical ordinal | 2. No<br>3. 1 NCD                                  |                                                                                                                                                                                          |



| Variables                                                                                                                                                                                                                                                                                                                    | Type                | Measurement                                               | Source of measurement                                                                                                                                                                         |
|------------------------------------------------------------------------------------------------------------------------------------------------------------------------------------------------------------------------------------------------------------------------------------------------------------------------------|---------------------|-----------------------------------------------------------|-----------------------------------------------------------------------------------------------------------------------------------------------------------------------------------------------|
| Multimorbidity                                                                                                                                                                                                                                                                                                               | Binary              | 4. 2 NCDs                                                 | Book IIIB:<br>CD06a – CD06r: Have a doctor/paramedic/nurse/ midwife ever told you that you had [list of chronic diseases]                                                                     |
|                                                                                                                                                                                                                                                                                                                              |                     | 5. 3+ NCDs                                                |                                                                                                                                                                                               |
|                                                                                                                                                                                                                                                                                                                              |                     | 0. No                                                     |                                                                                                                                                                                               |
|                                                                                                                                                                                                                                                                                                                              |                     | 1. Yes (had 2 or more chronic conditions related to NCDs) |                                                                                                                                                                                               |
| List of chronic diseases included in the main analysis:<br>Hypertension, diabetes, asthma, heart attack/coronary heart diseases, liver disease, stroke, cancer, arthritis/rheumatism, hypercholesterolemia, and depression/mental illness.                                                                                   |                     |                                                           |                                                                                                                                                                                               |
| List of chronic diseases in 2007 IFLS (Wave 4): Hypertension, diabetes, asthma, heart attack/coronary heart diseases, liver disease, stroke, cancer, arthritis/rheumatism, hypercholesterolemia, and depression/mental illness.                                                                                              |                     |                                                           |                                                                                                                                                                                               |
| List of chronic diseases in 2014 IFLS (Wave 5): Hypertension, diabetes, asthma, heart attack/coronary heart diseases, liver disease, stroke, cancer, arthritis/rheumatism, hypercholesterolemia, mental illness, prostate diseases, kidney diseases (excluding malignancy), digestive diseases, and memory-related diseases. |                     |                                                           |                                                                                                                                                                                               |
| <b>Covariates</b>                                                                                                                                                                                                                                                                                                            |                     |                                                           |                                                                                                                                                                                               |
| Age (in years)                                                                                                                                                                                                                                                                                                               | Categorical ordinal | 0. 40-49 years                                            | Book IIIA:<br>Age: How old are you?                                                                                                                                                           |
|                                                                                                                                                                                                                                                                                                                              |                     | 1. 50-59 years                                            |                                                                                                                                                                                               |
|                                                                                                                                                                                                                                                                                                                              |                     | 2. 60-69 years                                            |                                                                                                                                                                                               |
|                                                                                                                                                                                                                                                                                                                              |                     | 3. 70-79 years                                            |                                                                                                                                                                                               |
| Sex                                                                                                                                                                                                                                                                                                                          | Binary              | 4. 80+                                                    | Book IIIA:<br>Sex: (identified by interviewers)                                                                                                                                               |
|                                                                                                                                                                                                                                                                                                                              |                     | 0. Male                                                   |                                                                                                                                                                                               |
|                                                                                                                                                                                                                                                                                                                              |                     | 1. Female                                                 |                                                                                                                                                                                               |
|                                                                                                                                                                                                                                                                                                                              |                     | 0. Javanese                                               |                                                                                                                                                                                               |
| Ethnicity                                                                                                                                                                                                                                                                                                                    | Categorical nominal | 1. Sundanese                                              |                                                                                                                                                                                               |
|                                                                                                                                                                                                                                                                                                                              |                     | 2. Others                                                 |                                                                                                                                                                                               |
|                                                                                                                                                                                                                                                                                                                              |                     | 0. Unmarried/Divorce                                      |                                                                                                                                                                                               |
| Marital status                                                                                                                                                                                                                                                                                                               | Binary              | 1. Married or living together                             | Book IIIA<br>HR00b: Are you currently married?                                                                                                                                                |
|                                                                                                                                                                                                                                                                                                                              |                     | 0. None                                                   | Book IIIA:<br>DL06: What is the highest education level attended?<br>DL07: What is the highest grade completed at school.                                                                     |
| Education                                                                                                                                                                                                                                                                                                                    | Categorical ordinal | 1. Elementary school                                      |                                                                                                                                                                                               |
|                                                                                                                                                                                                                                                                                                                              |                     | 2. Junior high school                                     |                                                                                                                                                                                               |
|                                                                                                                                                                                                                                                                                                                              |                     | 3. High school                                            |                                                                                                                                                                                               |
|                                                                                                                                                                                                                                                                                                                              |                     | 4. Tertiary                                               |                                                                                                                                                                                               |
| Occupation                                                                                                                                                                                                                                                                                                                   | Categorical nominal | 0. None                                                   | Book IIIA:<br>TK06a: Did you work/try to work/help to earn income for pay for at least 1 hour during the past week?<br>TK15: Which category best describes the work you did in your last job? |
|                                                                                                                                                                                                                                                                                                                              |                     | 1. Casual worker                                          |                                                                                                                                                                                               |
|                                                                                                                                                                                                                                                                                                                              |                     | 2. Self-employed                                          |                                                                                                                                                                                               |
|                                                                                                                                                                                                                                                                                                                              |                     | 3. Government/private worker                              |                                                                                                                                                                                               |
| Health insurance status                                                                                                                                                                                                                                                                                                      | Binary              | 0. Uninsured (Not covered by any insurance)               | Book IIIB:<br>AK01: Are you the policy holder/primary beneficiary of health benefits-health insurance?                                                                                        |
|                                                                                                                                                                                                                                                                                                                              |                     | 1. Insured                                                |                                                                                                                                                                                               |
| Per capita expenditure                                                                                                                                                                                                                                                                                                       | Categorical ordinal | 0. Q1 (lowest)                                            | Book KS                                                                                                                                                                                       |
|                                                                                                                                                                                                                                                                                                                              |                     | 1. Q2                                                     |                                                                                                                                                                                               |
|                                                                                                                                                                                                                                                                                                                              |                     | 2. Q3                                                     |                                                                                                                                                                                               |
|                                                                                                                                                                                                                                                                                                                              |                     | 3. Q4                                                     |                                                                                                                                                                                               |
|                                                                                                                                                                                                                                                                                                                              |                     | 4. Q5 (highest)                                           |                                                                                                                                                                                               |
| Residency                                                                                                                                                                                                                                                                                                                    | Binary              | 0. Rural                                                  | Book T-2:<br>SC06: (identified by interviewers)                                                                                                                                               |
|                                                                                                                                                                                                                                                                                                                              |                     | 1. Urban                                                  |                                                                                                                                                                                               |
| Region                                                                                                                                                                                                                                                                                                                       | Categorical nominal | 0. Java-Bali                                              | Book T-2:<br>SC01: province (identified by interviewers)                                                                                                                                      |
|                                                                                                                                                                                                                                                                                                                              |                     | 1. Sumatra                                                |                                                                                                                                                                                               |
|                                                                                                                                                                                                                                                                                                                              |                     | 2. Nusa Tenggara                                          |                                                                                                                                                                                               |
|                                                                                                                                                                                                                                                                                                                              |                     | 3. Kalimantan                                             |                                                                                                                                                                                               |
|                                                                                                                                                                                                                                                                                                                              |                     | 4. Sulawesi                                               |                                                                                                                                                                                               |

617 Table S3. Sample characteristics by number of NCDs

| Characteristics       | 2007 (n=3,678)        |                      |                           | 2014 (n=3,678)        |                      |                           |
|-----------------------|-----------------------|----------------------|---------------------------|-----------------------|----------------------|---------------------------|
|                       | Zero NCD<br>(n=1,272) | One NCD<br>(n=1,605) | Multimorbidity<br>(n=801) | Zero NCD<br>(n=1,052) | One NCD<br>(n=1,751) | Multimorbidity<br>(n=875) |
| Sex                   |                       |                      |                           |                       |                      |                           |
| Male                  | 44.2 (41.5–46.9)      | 41.7 (39.1–44.5)     | 14.1 (12.3–16.1)          | 34.7 (32.1–37.3)      | 45.9 (43.2–48.7)     | 19.3 (17.3–21.6)          |
| Female                | 28.9 (26.7–31.3)      | 44.2 (41.7–46.7)     | 26.9 (24.8–29.2)          | 24.6 (22.5–26.8)      | 51.1 (48.6–53.6)     | 24.3 (22.3–26.4)          |
| Age                   |                       |                      |                           |                       |                      |                           |
| 50 – 60 years         | 39.9 (37.55–42.2)     | 40.3 (38.0–42.6)     | 19.9 (18.1–21.8)          | 36.4 (33.0–39.9)      | 40.1 (36.6–43.7)     | 23.5 (20.7–26.7)          |
| 61 – 70 years         | 32.3 (29.1–35.6)      | 45.9 (42.5–49.3)     | 21.9 (19.2–24.8)          | 30.2 (27.7–32.9)      | 48.2 (45.4–51.0)     | 21.6 (19.4–23.9)          |
| 71+ years             | 23.9 (19.2–29.3)      | 50.9 (45.2–56.6)     | 25.2 (20.6–30.4)          | 22.0 (19.4–25.0)      | 56.6 (53.2–59.8)     | 21.4 (18.8–24.2)          |
| Marital status        |                       |                      |                           |                       |                      |                           |
| Not currently married | 25.6 (22.5–29.0)      | 48.3 (44.6–52.0)     | 26.1 (23.0–29.4)          | 23.8 (21.2–26.5)      | 52.9 (49.9–56.0)     | 23.3 (20.9–25.9)          |
| Currently married     | 39.5 (37.4–41.6)      | 41.2 (39.1–43.4)     | 19.3 (17.7–21.1)          | 32.4 (30.2–34.6)      | 46.3 (44.0–48.7)     | 21.3 (19.5–23.2)          |
| Educational level     |                       |                      |                           |                       |                      |                           |
| No education          | 24.8 (32.5–37.2)      | 44.8 (42.3–47.2)     | 20.4 (18.5–22.5)          | 29.6 (27.4–31.9)      | 52.4 (50.0–54.8)     | 18.0 (16.2–19.8)          |
| Primary               | 40.5 (36.9–44.2)      | 39.8 (36.2–46.3)     | 19.7 (17.0–22.7)          | 28.6 (25.3–32.1)      | 47.5 (43.7–51.3)     | 24.0 (20.9–27.3)          |
| Junior high school    | 34.4 (28.3–41.1)      | 39.6 (33.4–46.3)     | 25.9 (20.5–32.3)          | 31.6 (25.6–38.3)      | 32.1 (26.1–38.7)     | 36.3 (30.2–43.0)          |
| Senior high school    | 35.9 (30.2–42.1)      | 43.6 (37.5–49.8)     | 20.5 (15.8–25.9)          | 28.9 (23.4–35.0)      | 41.6 (35.6–48.0)     | 29.5 (24.1–35.5)          |
| Tertiary              | 23.7 (16.2–33.2)      | 41.9 (32.1–52.4)     | 34.4 (25.2–44.8)          | 23.0 (15.8–32.2)      | 35.7 (27.0–45.5)     | 41.2 (31.6–51.6)          |
| Ethnicity             |                       |                      |                           |                       |                      |                           |
| Javanese              | 37.0 (34.5–39.6)      | 43.6 (41.0–46.2)     | 19.4 (17.4–21.5)          | 29.7 (27.4–32.1)      | 50.6 (48.1–53.2)     | 19.7 (17.8–21.8)          |
| Sundanese             | 30.4 (25.9–35.2)      | 40.5 (35.7–45.5)     | 29.1 (24.8–33.9)          | 23.5 (19.6–27.9)      | 49.3 (44.3–54.2)     | 27.3 (23.1–31.8)          |
| Others                | 37.0 (34.2–39.9)      | 43.4 (40.5–46.3)     | 19.6 (17.4–22.0)          | 31.7 (29.0–34.7)      | 44.6 (41.6–47.7)     | 23.6 (21.2–26.2)          |
| Insurance coverage    |                       |                      |                           |                       |                      |                           |
| No                    | 36.5 (34.4–38.6)      | 43.2 (41.1–45.4)     | 20.3 (18.6–22.1)          | 31.1 (28.9–33.5)      | 50.2 (47.7–52.7)     | 18.7 (16.9–20.7)          |
| Yes                   | 34.2 (30.9–37.7)      | 42.5 (39.1–46.0)     | 23.2 (20.4–26.4)          | 26.7 (24.3–29.2)      | 46.8 (44.1–49.6)     | 26.4 (24.2–28.9)          |
| Type of work          |                       |                      |                           |                       |                      |                           |
| Unemployed            | 22.5 (19.6–25.6)      | 46.2 (42.6–49.8)     | 31.4 (28.1–34.9)          | 19.6 (17.4–22.1)      | 50.4 (47.5–53.3)     | 29.9 (27.4–32.6)          |
| Casual                | 41.8 (37.6–46.1)      | 41.3 (37.2–45.6)     | 16.9 (13.9–20.4)          | 36.5 (31.6–41.6)      | 49.7 (44.6–54.8)     | 13.8 (10.7–17.6)          |
| Self-employed         | 41.1 (38.4–43.9)      | 42.1 (39.4–44.8)     | 16.8 (14.9–18.9)          | 34.2 (31.5–37.0)      | 48.4 (45.4–51.3)     | 17.4 (15.4–19.7)          |
| Government/private    | 34.8 (29.8–40.2)      | 43.0 (37.7–48.4)     | 22.2 (18.0–27.1)          | 39.6 (33.0–46.5)      | 39.4 (32.9–46.3)     | 21.0 (15.8–27.4)          |
| Household expenditure |                       |                      |                           |                       |                      |                           |
| Q1 (the lowest)       | 39.9 (36.0–43.9)      | 44.1 (40.1–48.1)     | 15.8 (13.0–18.9)          | 30.9 (27.5–34.6)      | 55.6 (51.8–59.3)     | 13.5 (11.1–16.2)          |
| Q2                    | 39.6 (35.7–43.6)      | 42.4 (38.6–46.4)     | 17.9 (15.1–21.2)          | 31.6 (27.9–35.5)      | 49.5 (45.4–53.6)     | 18.9 (15.9–22.3)          |
| Q3                    | 36.4 (32.5–40.5)      | 43.1 (39.1–47.2)     | 20.5 (17.4–24.0)          | 31.4 (27.7–35.3)      | 46.5 (42.5–50.6)     | 22.1 (18.9–25.7)          |
| Q4                    | 31.7 (27.9–35.7)      | 44.6 (40.5–48.7)     | 23.6 (20.3–27.3)          | 27.0 (23.3–31.1)      | 47.8 (43.4–52.1)     | 25.3 (21.9–29.0)          |
| Q5 (the highest)      | 28.8 (24.9–33.0)      | 40.5 (36.3–44.9)     | 30.4 (26.5–34.7)          | 23.1 (19.6–27.0)      | 40.7 (36.5–45.0)     | 36.2 (32.2–40.5)          |
| Residency             |                       |                      |                           |                       |                      |                           |
| Rural                 | 38.7 (36.3–41.1)      | 43.2 (40.8–45.7)     | 18.1 (16.3–20.1)          | 31.0 (28.6–33.5)      | 52.1 (49.4–54.7)     | 16.9 (15.1–19.0)          |
| Urban                 | 31.2 (28.7–33.7)      | 42.7 (40.1–45.4)     | 26.1 (23.8–28.6)          | 27.3 (25.1–29.6)      | 45.0 (42.5–47.5)     | 27.7 (25.5–30.0)          |
| Island                |                       |                      |                           |                       |                      |                           |
| Java-Bali             | 36.5 (34.4–38.7)      | 41.9 (39.7–44.1)     | 21.6 (19.9–23.5)          | 29.7 (27.7–31.7)      | 49.3 (47.1–51.5)     | 21.1 (19.3–22.9)          |
| Sumatra               | 34.6 (31.0–38.4)      | 45.9 (42.0–49.8)     | 19.6 (16.7–22.8)          | 27.9 (24.6–31.6)      | 45.4 (41.6–49.4)     | 26.6 (23.3–30.2)          |
| Nusa Tenggara         | 44.0 (37.7–50.5)      | 41.6 (35.3–48.1)     | 14.5 (10.6–19.5)          | 31.4 (25.7–37.7)      | 54.1 (47.6–60.5)     | 14.5 (10.5–19.6)          |
| Kalimantan            | 25.2 (19.2–32.4)      | 56.9 (49.0–64.4)     | 17.9 (12.7–24.5)          | 23.4 (17.6–30.6)      | 42.4 (35.0–50.1)     | 34.2 (27.4–41.7)          |
| Sulawesi              | 30.0 (23.3–37.6)      | 50.4 (42.6–58.2)     | 19.6 (14.1–26.6)          | 26.7 (20.3–34.2)      | 49.7 (41.8–57.5)     | 23.7 (17.6–31.0)          |
| Overall (N, %)        | 1,272 (35.9)          | 1,605 (43.0)         | 801 (21.0)                | 1,052 (29.2)          | 1,751 (48.7)         | 875 (22.0)                |

618

619 **Figure S2. Prevalence of multimorbidity by age group and level of education**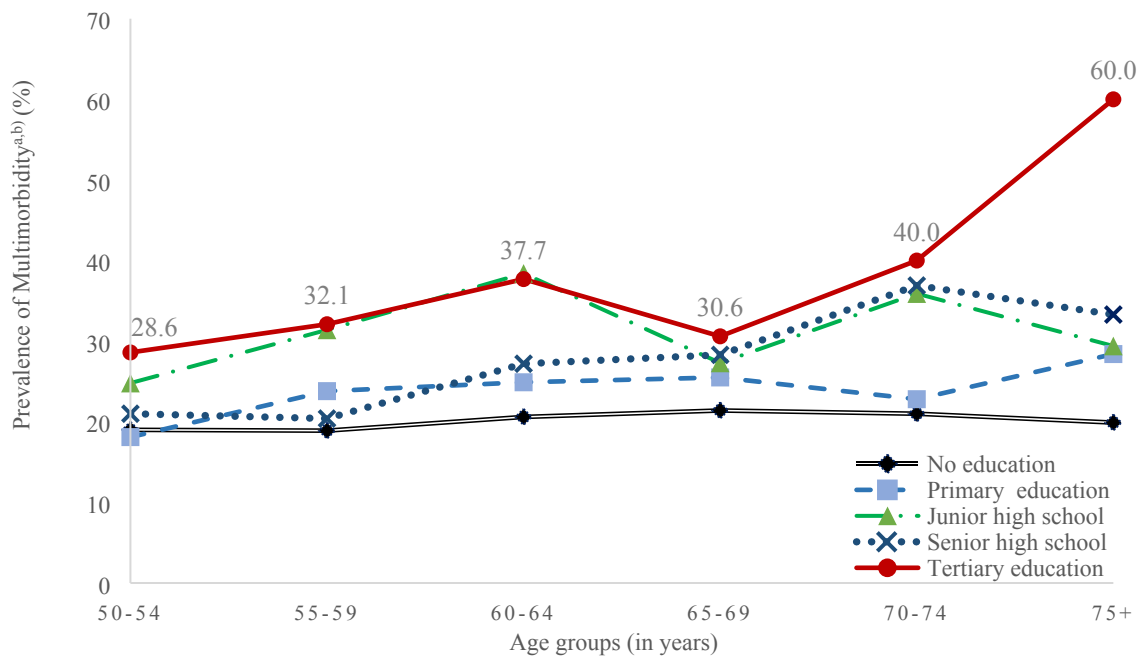

620

621

a) respondents who reported that they had 2 or more chronic conditions related to non-communicable diseases (NCDs). b) Pooled sample of Wave 4 and Wave 5.

622

623

624

625

**Table S4. Intraclass correlation coefficients (ICC) on multimorbidity, health service use and labour participation**

|                   | Multimorbidity | Any outpatient visit | Any inpatient visit | 10% of total household expenditure | 25% of total household expenditure | 40% of non-food expenditure | Labour participation |
|-------------------|----------------|----------------------|---------------------|------------------------------------|------------------------------------|-----------------------------|----------------------|
| <b>Individual</b> |                |                      |                     |                                    |                                    |                             |                      |
| Variance (SE)     | 1.09 (0.25)    | 0.10 (0.18)          | 0.57 (0.74)         | 0 (0)                              | 0 (0)                              | 0 (0)                       | 1.22 (0.30)          |
| ICC (SE)          | 0.34 (0.03)    | 0.14 (0.03)          | 0.25 (0.12)         | 0.25 (0.03)                        | 0.48 (0.04)                        | 0.69 (0.04)                 | 0.48 (0.03)          |
| <b>Household</b>  |                |                      |                     |                                    |                                    |                             |                      |
| Variance (SE)     | 0.64 (0.20)    | 0.43 (0.14)          | 0.54 (0.57)         | 1.13 (0.20)                        | 3.08 (0.55)                        | 7.29 (1.3)                  | 1.70 (0.28)          |
| ICC (SE)          | 0.13 (0.40)    | 0.11 (0.04)          | 0.12 (0.12)         | 0.25 (0.03)                        | 0.48 (0.04)                        | 0.69 (0.04)                 | 0.28 (0.04)          |
| <b>District</b>   |                |                      |                     |                                    |                                    |                             |                      |
| Variance (SE)     | 0 (0)          | 0 (0)                | 0 (0)               | 0 (0)                              | 0 (0)                              | 0 (0)                       | 0.07 (0.04)          |
| ICC (SE)          | 0 (0)          | 0 (0)                | 0 (0)               | 0 (0)                              | 0 (0)                              | 0 (0)                       | 0.01 (0.01)          |

626

627

Note:

628

All models are controlled for study variables, including sex, age, marital status, education, ethnicity, insurance coverage, type of work, per capita expenditure (PCE), residency, and region. SE: standard error. ICC: intraclass correlation

629

630

**631 Table S5. Robustness check: descriptive summary and factors associated with**  
**632 multimorbidity (cross-sectional analysis of 2014 IFLS)**

| Characteristics          | Weighted %<br>Of sample | Zero NCD<br>(%, 95% CI) | One NCD<br>(%, 95% CI) | Two NCDs<br>(%, 95% CI) | Three or more<br>NCDs<br>(%, 95% CI) | Multimorbidity <sup>b</sup><br>(%, 95% CI) | aOR (95% CI)        |
|--------------------------|-------------------------|-------------------------|------------------------|-------------------------|--------------------------------------|--------------------------------------------|---------------------|
| Sex                      |                         |                         |                        |                         |                                      |                                            |                     |
| Female                   | 51.9                    | 24.8 (22.3, 26.3)       | 46.1 (44.4, 47.8)      | 18.8 (17.5, 20.1)       | 10.3 (9.3, 11.4)                     | 29.1 (27.6, 30.6)                          | 1                   |
| Male                     | 48.1                    | 36.5 (34.7, 38.3)       | 42.0 (40.2, 43.9)      | 14.0 (12.8, 15.4)       | 7.4 (6.5, 8.4)                       | 21.5 (20.0, 23.0)                          | 0.68*** (0.59–0.78) |
| Age                      |                         |                         |                        |                         |                                      |                                            |                     |
| 50 – 60 years            | 56.2                    | 35.3 (33.7, 37.1)       | 41.0 (39.3, 42.7)      | 15.2 (14.0, 16.5)       | 8.5 (7.6, 9.5)                       | 23.7 (22.8, 25.2)                          | 1                   |
| 61 – 70 years            | 25.6                    | 26.5 (24.4, 28.8)       | 45.4 (42.9, 47.9)      | 17.7 (15.9, 19.6)       | 10.4 (9.0, 11.9)                     | 28.1 (25.6, 30.3)                          | 1.23*** (1.10–1.42) |
| 71+ years                | 18.2                    | 20.8 (18.6, 23.3)       | 52.2 (49.4, 55.1)      | 18.8 (16.7, 21.0)       | 8.2 (6.8, 9.8)                       | 26.9 (24.6, 29.5)                          | 1.85 (0.99–1.42)    |
| Marital status           |                         |                         |                        |                         |                                      |                                            |                     |
| Not currently married    | 28.2                    | 24.7 (22.7, 26.8)       | 46.9 (44.6, 49.2)      | 19.3 (17.5, 21.2)       | 9.1 (8.0, 10.5)                      | 28.4 (26.4, 30.5)                          | 1                   |
| Currently married        | 71.8                    | 32.7 (31.3, 34.1)       | 43.1 (41.6, 44.6)      | 15.4 (14.4, 16.5)       | 8.8 (8.0, 9.7)                       | 24.2 (23.0, 25.5)                          | 1.05 (0.89–1.21)    |
| Educational level        |                         |                         |                        |                         |                                      |                                            |                     |
| No education             | 53.3                    | 31.3 (29.7, 33.0)       | 47.7 (45.9, 49.4)      | 14.1 (13.0, 15.4)       | 6.9 (6.1, 7.8)                       | 21.0 (19.7, 22.4)                          | 1                   |
| Primary                  | 23.8                    | 30.0 (27.6, 32.4)       | 42.8 (40.2, 45.4)      | 18.2 (16.3, 20.3)       | 9.0 (7.7, 10.6)                      | 27.2 (25.0, 29.6)                          | 1.35*** (1.16–1.57) |
| Junior high school       | 7.8                     | 30.9 (27.0, 35.1)       | 34.8 (30.7, 39.1)      | 20.2 (16.9, 23.9)       | 14.2 (11.4, 17.5)                    | 34.4 (30.3, 38.6)                          | 1.66*** (1.33–2.06) |
| Senior high school       | 10.0                    | 30.4 (26.9, 34.1)       | 38.7 (35.0, 42.6)      | 18.0 (15.3, 21.1)       | 12.8 (10.4, 15.7)                    | 30.9 (27.4, 34.5)                          | 1.23 (0.99–1.53)    |
| Tertiary                 | 5.1                     | 22.8 (18.5, 27.8)       | 38.7 (33.5, 44.2)      | 24.4 (20.0, 29.4)       | 14.1 (10.6, 18.4)                    | 38.4 (33.3, 43.9)                          | 1.77*** (1.33–2.36) |
| Ethnicity                |                         |                         |                        |                         |                                      |                                            |                     |
| Javanese                 | 56.3                    | 31.3 (29.7, 33.0)       | 45.7 (44.0, 47.5)      | 15.2 (14.0, 16.5)       | 7.7 (6.8, 8.6)                       | 22.9 (21.5, 24.4)                          | 1                   |
| Sundanese                | 15.5                    | 22.9 (20.1, 25.9)       | 43.4 (40.0, 46.8)      | 21.1 (18.4, 24.0)       | 12. (10.6, 15.1)                     | 33.7 (30.6, 37.0)                          | 1.53*** (1.28–1.83) |
| Others                   | 28.2                    | 32.7 (30.8, 34.7)       | 41.5 (39.4, 43.5)      | 16.5 (15.1, 18.0)       | 9.3 (8.2, 10.6)                      | 25.8 (24.1, 27.6)                          | 1.04 (0.89–1.22)    |
| Had any health insurance |                         |                         |                        |                         |                                      |                                            |                     |
| No                       | 53.9                    | 32.4 (30.8, 34.1)       | 46.2 (44.4, 47.9)      | 14.3 (13.1, 15.5)       | 7.1 (6.3, 8.1)                       | 21.4 (20.1, 22.9)                          | 1                   |
| Yes                      | 46.1                    | 28.1 (26.5, 29.8)       | 41.8 (40.0, 43.6)      | 19.0 (17.7, 20.5)       | 11.0 (9.9, 12.2)                     | 30.0 (28.4, 31.7)                          | 1.22*** (1.23–1.57) |
| Type of work             |                         |                         |                        |                         |                                      |                                            |                     |
| Unemployed               | 30.6                    | 19.8 (18.1, 21.7)       | 44.2 (42.0, 46.4)      | 21.3 (19.6, 23.2)       | 14.6 (13.2, 16.3)                    | 36.0 (33.9, 38.1)                          | 1                   |
| Casual                   | 15.6                    | 36.1 (33.0, 39.4)       | 45.5 (42.2, 48.7)      | 13.3 (11.3, 15.7)       | 5.0 (3.8, 6.6)                       | 18.4 (16.0, 21.0)                          | 0.50*** (0.41–0.62) |
| Self-employed            | 39.8                    | 34.6 (32.7, 36.6)       | 44.4 (42.4, 46.4)      | 14.5 (13.2, 16.0)       | 6.4 (5.5, 7.5)                       | 21.0 (19.4, 22.7)                          | 0.57*** (0.49–0.66) |
| Government/private       | 14.0                    | 35.2 (32.0, 38.6)       | 41.9 (38.6, 45.4)      | 15.0 (12.8, 17.5)       | 7.8 (6.2, 9.9)                       | 22.8 (20.1, 25.8)                          | 0.50*** (0.40–0.62) |
| Household expenditure    |                         |                         |                        |                         |                                      |                                            |                     |
| Q1 (the lowest)          | 21.3                    | 33.2 (30.7, 35.9)       | 49.3 (46.5, 52.1)      | 12.7 (11.0, 14.6)       | 4.8 (3.7, 6.1)                       | 17.5 (15.5, 19.6)                          | 1                   |
| Q2                       | 20.9                    | 33.5 (30.8, 36.2)       | 45.0 (42.3, 47.9)      | 15.6 (13.7, 17.7)       | 5.8 (4.6, 7.3)                       | 21.5 (19.2, 23.8)                          | 1.28** (1.05–1.58)  |
| Q3                       | 19.8                    | 31.7 (29.1, 34.4)       | 43.7 (41.0, 46.5)      | 6.0 (4.0, 18.1)         | 8.6 (7.2, 10.3)                      | 24.6 (22.2, 17.1)                          | 1.46*** (1.19–1.78) |
| Q4                       | 19.5                    | 28.8 (26.3, 31.5)       | 41.5 (38.7, 44.3)      | 18.8 (16.7, 21.1)       | 10.9 (9.3, 12.7)                     | 19.7 (27.2, 32.3)                          | 1.80*** (1.47–2.20) |
| Q5 (the highest)         | 18.5                    | 24.0 (21.7, 26.5)       | 40.5 (37.8, 43.3)      | 19.9 (17.8, 22.2)       | 15.5 (13.5, 17.6)                    | 35.4 (32.8, 38.1)                          | 2.03*** (1.65–2.50) |
| Residency                |                         |                         |                        |                         |                                      |                                            |                     |
| Rural                    | 48.9                    | 33.3 (31.5, 35.1)       | 46.4(44.5, 48.3)       | 14.2 (12.9, 15.5)       | 6.1 (5.2, 7.0)                       | 20.3 (18.8, 21.8)                          | 1                   |
| Urban                    | 51.3                    | 27.7 (26.2, 29.2)       | 42.0 (40.3, 43.7)      | 19.0 (17.4, 20.0)       | 11.6 (10.6, 12.7)                    | 30.3 (28.8, 31.9)                          | 1.37*** (1.19–1.56) |
| Island                   |                         |                         |                        |                         |                                      |                                            |                     |
| Java-Bali                | 78.6                    | 30.3 (28.9, 31.7)       | 44.7 (43.2, 16.2)      | 16.0 (15.0, 17.1)       | 9.0 (8.2, 9.9)                       | 25.1 (23.8, 26.4)                          | 1                   |
| Sumatra                  | 14.0                    | 30.6 (28.2, 33.1)       | 41.1 (38.5, 43.7)      | 19.1 (17.1, 21.2)       | 9.2 (7.8, 10.8)                      | 28.3 (26.0, 30.7)                          | 1.34*** (1.14–1.58) |
| Nusa Tenggara            | 2.4                     | 37.2 (32.9, 41.7)       | 47.2 (42.7, 51.7)      | 13.3 (10.5, 16.6)       | 2.3 (12.8, 4.1)                      | 15.6 (12.6, 19.1)                          | 0.62*** (0.46–0.83) |
| Kalimantan               | 2.4                     | 24.3 (19.7, 29.5)       | 41.5 (36.1, 47.2)      | 22.9 (18.6, 27.9)       | 11.3 (8.2, 15.3)                     | 34.2 (29.1, 39.7)                          | 2.02*** (1.53–2.67) |
| Sulawesi                 | 2.6                     | 33.6 (28.7, 38.9)       | 44.7 (39.4, 50.0)      | 14.2 (10.9, 18.4)       | 7.5 (5.2, 10.6)                      | 21.7 (17.7, 26.4)                          | 0.87 (0.64–1.18)    |
| Overall Sample           | 100                     | 30.4 (29.3, 31.6)       | 44.1 (42.9, 45.4)      | 16.5 (15.6, 17.4)       | 8.9 (8.2, 9.6)                       | 25.4 (24.3, 26.5)                          |                     |

<sup>a</sup> Weighted sample size  
<sup>b</sup> We defined multimorbidity if the respondents reported that they had 2 or more chronic conditions related to NCDs. Chronic diseases in IFLS5 included hypertension, diabetes mellitus, asthma, chronic heart diseases, mental health issue, stroke, liver diseases, cancer/malignancies, liver, arthritis, high cholesterol, prostate illness kidney diseases, digestive system diseases.  
aOR: adjusted odds ratio  
\*\*\* p<0.01, \*\* p<0.05

633

635 **Table S6. Robustness check: The effect of multimorbidity on health service use (cross-**  
 636 **sectional analysis of 2014 IFLS)**

| Variables                             | Health service use        |                                  |                           |                                  |
|---------------------------------------|---------------------------|----------------------------------|---------------------------|----------------------------------|
|                                       | Outpatient                |                                  | Inpatient                 |                                  |
|                                       | Any visit<br>aOR (95% CI) | Number of visits<br>IRR (95% CI) | Any visit<br>aOR (95% CI) | Number of visits<br>IRR (95% CI) |
| Number of NCDs (ref. no NCD)          |                           |                                  |                           |                                  |
| Single NCD                            | 1.54*** (1.30–1.82)       | 1.50*** (1.24–1.81)              | 1.73** (1.17–2.56)        | 2.03*** (1.36–3.03)              |
| Two NCDs                              | 2.77*** (2.29–3.36)       | 2.68*** (2.15–3.34)              | 3.47*** (2.31–5.21)       | 4.03*** (2.66–6.08)              |
| Three or more NCDs                    | 4.51*** (3.61–5.63)       | 3.85*** (3.06–4.84)              | 6.85*** (4.45–10.52)      | 8.78*** (5.73–13.45)             |
| Sex (ref. Male)                       |                           |                                  |                           |                                  |
| Female                                | 1.26*** (1.09–1.45)       | 1.18** (1.02–1.35)               | 0.93 (0.72–1.22)          | 0.81 (0.62–1.07)                 |
| Age (ref. 50 – 60 years)              |                           |                                  |                           |                                  |
| 61 – 70 years                         | 1.01 (0.87–1.18)          | 0.93 (0.80–1.08)                 | 1.23 (0.91–1.65)          | 1.23 (0.88–1.72)                 |
| 71+ years                             | 1.03 (0.85–1.25)          | 1.01 (0.84–1.21)                 | 1.42 (1.02–2.00)          | 1.53** (1.01–2.32)               |
| Marital status (ref. Not married)     |                           |                                  |                           |                                  |
| Currently married                     | 1.09 (0.93–1.27)          | 1.04 (0.90–1.21)                 | 1.07 (0.80–1.41)          | 0.93 (0.70–1.25)                 |
| Educational level (ref. No education) |                           |                                  |                           |                                  |
| Primary                               | 0.94 (0.80–1.10)          | 0.87* (0.74–1.01)                | 1.02 (0.75–1.39)          | 0.96 (0.69–1.35)                 |
| Junior high school                    | 1.02 (0.80–1.31)          | 1.07 (0.76–1.52)                 | 0.72 (0.45–1.14)          | 0.82 (0.47–1.44)                 |
| Senior high school                    | 0.87 (0.68–1.10)          | 0.80* (0.64–1.00)                | 0.69 (0.44–1.08)          | 0.63* (0.39–1.00)                |
| Tertiary                              | 0.99 (0.73–1.33)          | 0.79 (0.55–1.13)                 | 0.58* (0.33–1.02)         | 0.55* (0.30–1.00)                |
| Ethnicity (ref. Javanese)             |                           |                                  |                           |                                  |
| Sundanese                             | 0.93 (0.77–1.13)          | 0.97 (0.81–1.17)                 | 1.17 (0.84–1.63)          | 1.21 (0.82–1.79)                 |
| Others                                | 1.06 (0.89–1.25)          | 0.99 (0.84–1.17)                 | 0.78 (0.56–1.08)          | 0.87 (0.62–1.22)                 |
| Insurance coverage (ref. No)          |                           |                                  |                           |                                  |
| Yes                                   | 1.20*** (1.06–1.37)       | 1.25*** (1.10–1.44)              | 2.28*** (1.77–2.95)       | 2.19*** (1.66–2.89)              |
| Type of work (ref. Unemployed)        |                           |                                  |                           |                                  |
| Casual                                | 0.73*** (0.59–0.90)       | 0.73*** (0.60–0.89)              | 0.41*** (0.25–0.67)       | 0.35*** (0.22–0.55)              |
| Self-employed                         | 0.77*** (0.66–0.90)       | 0.77*** (0.66–0.90)              | 0.64*** (0.47–0.87)       | 0.64*** (0.46–0.90)              |
| Government/private                    | 0.70*** (0.56–0.88)       | 0.75*** (0.60–0.93)              | 0.43*** (0.28–0.66)       | 0.53** (0.30–0.94)               |
| Per capita expenditure (ref. Q1)      |                           |                                  |                           |                                  |
| Q2                                    | 1.36*** (1.10–1.68)       | 1.40*** (1.14–1.73)              | 0.86 (0.57–1.31)          | 0.76 (0.48–1.18)                 |
| Q3                                    | 1.50*** (1.21–1.85)       | 1.71*** (1.35–2.17)              | 1.16 (0.78–1.72)          | 1.29 (0.80–2.05)                 |
| Q4                                    | 1.93*** (1.56–2.38)       | 1.75*** (1.44–2.14)              | 1.24 (0.83–1.85)          | 1.35 (0.87–2.08)                 |
| Q5                                    | 1.87*** (1.50–2.33)       | 2.02*** (1.63–2.51)              | 2.06*** (1.38–3.06)       | 1.98*** (1.32–2.96)              |
| Residency (ref. Rural)                |                           |                                  |                           |                                  |
| Urban                                 | 0.94 (0.82–1.08)          | 0.98 (0.86–1.13)                 | 0.93 (0.71–1.21)          | 1.03 (0.79–1.34)                 |
| Region (ref. Java-Bali)               |                           |                                  |                           |                                  |
| Sumatra                               | 0.72*** (0.60–0.86)       | 0.86 (0.72–1.03)                 | 1.32 (0.96–1.82)          | 1.46** (1.04–2.06)               |
| Nusa Tenggara                         | 0.84 (0.63–1.12)          | 0.84 (0.63–1.12)                 | 1.83** (1.09–3.06)        | 1.87** (1.08–3.25)               |
| Kalimantan                            | 0.81 (0.59–1.11)          | 0.85 (0.62–1.14)                 | 1.46 (0.82–2.58)          | 1.4 (0.81–2.42)                  |
| Sulawesi                              | 0.54*** (0.39–0.75)       | 0.53*** (0.39–0.71)              | 1.45 (0.81–2.60)          | 1.59 (0.85–2.98)                 |

Chronic diseases in IFLS5 included hypertension-diabetes mellitus-asthma-chronic heart diseases-mental health issue-stroke-liver diseases-cancer/malignancies-liver-arthritis-high cholesterol-prostate illness kidney diseases-digestive system diseases.

aOR: adjusted odds ratio, IRR: incidence rate ratio, NCD: non-communicable disease

\*\*\* p<0.01, \*\* p<0.05

637

638 **Table S7. Robustness check: The effect of multimorbidity on catastrophic health**  
 639 **expenditure (cross-sectional analysis of 2014 IFLS)**

| Variables                             | Catastrophic health expenditure    |                                    |                             |
|---------------------------------------|------------------------------------|------------------------------------|-----------------------------|
|                                       | 10% of total household expenditure | 25% of total household expenditure | 40% of non-food expenditure |
|                                       | aOR (95% CI)                       | aOR (95% CI)                       | aOR (95% CI)                |
| Number of NCDs (ref. no NCD)          |                                    |                                    |                             |
| Single NCD                            | 1.25 (0.94–1.66)                   | 1.18 (0.67–2.09)                   | 1.58 (0.98–2.57)            |
| Two NCDs                              | 2.03*** (1.48–2.79)                | 2.10** (1.12–3.93)                 | 2.39*** (1.38–4.14)         |
| Three or more NCDs                    | 2.24*** (1.57–3.20)                | 2.09** (1.06–4.12)                 | 2.17** (1.18–4.01)          |
| Sex (ref. Male)                       |                                    |                                    |                             |
| Female                                | 0.87 (0.68–1.12)                   | 0.74 (0.43–1.27)                   | 0.90 (0.59–1.37)            |
| Age (ref. 50 – 60 years)              |                                    |                                    |                             |
| 61 – 70 years                         | 1.24 (0.96–1.60)                   | 1.34 (0.82–2.20)                   | 1.42 (0.94–2.14)            |
| 71+ years                             | 1.32 (0.96–1.81)                   | 1.06 (0.53–2.13)                   | 1.48 (0.88–2.51)            |
| Marital status (ref. Not married)     |                                    |                                    |                             |
| Currently married                     | 1.44** (1.08–1.91)                 | 1.69* (0.91–3.17)                  | 1.94*** (1.20–3.14)         |
| Educational level (ref. No education) |                                    |                                    |                             |
| Primary                               | 1.14 (0.88–1.48)                   | 1.31 (0.79–2.17)                   | 1.46 (0.98–2.18)            |
| Junior high school                    | 1.11 (0.76–1.63)                   | 1.28 (0.67–2.46)                   | 1.12 (0.63–1.98)            |
| Senior high school                    | 0.73 (0.49–1.08)                   | 0.52 (0.22–1.23)                   | 0.45** (0.21–0.97)          |
| Tertiary                              | 0.74 (0.43–1.27)                   | 0.22 (0.05–1.01)                   | 0.12** (0.02–0.66)          |
| Ethnicity (ref. Javanese)             |                                    |                                    |                             |
| Sundanese                             | 0.87 (0.64–1.18)                   | 1.09 (0.62–1.89)                   | 0.83 (0.51–1.35)            |
| Others                                | 0.79 (0.60–1.04)                   | 0.65 (0.36–1.18)                   | 0.47*** (0.28–0.78)         |
| Insurance coverage (ref. No)          |                                    |                                    |                             |
| Yes                                   | 1 (0.81–1.25)                      | 1.07 (0.71–1.61)                   | 1.02 (0.72–1.44)            |
| Type of work (ref. Unemployed)        |                                    |                                    |                             |
| Casual                                | 0.66** (0.46–0.95)                 | 0.56 (0.27–1.16)                   | 0.56 (0.31–1.04)            |
| Self-employed                         | 0.70*** (0.53–0.91)                | 0.44*** (0.24–0.79)                | 0.54*** (0.34–0.85)         |
| Government/private                    | 0.57*** (0.39–0.83)                | 0.41** (0.19–0.88)                 | 0.46** (0.23–0.91)          |
| Per capita expenditure (ref. Q1)      |                                    |                                    |                             |
| Q2                                    | 0.96 (0.65–1.43)                   | 1.05 (0.47–2.35)                   | 1.24 (0.67–2.33)            |
| Q3                                    | 1.42 (0.99–2.02)                   | 1 (0.46–2.17)                      | 1.08 (0.58–2.01)            |
| Q4                                    | 1.59** (1.11–2.27)                 | 2.37** (1.15–4.86)                 | 2.18*** (1.21–3.92)         |
| Q5                                    | 2.53*** (1.76–3.62)                | 2.44** (1.18–5.05)                 | 2.75*** (1.51–5.02)         |
| Residency (ref. Rural)                |                                    |                                    |                             |
| Urban                                 | 1.01 (0.80–1.26)                   | 0.87 (0.56–1.37)                   | 0.94 (0.65–1.35)            |
| Region (ref. Java-Bali)               |                                    |                                    |                             |
| Sumatra                               | 0.94 (0.71–1.24)                   | 0.94 (0.55–1.60)                   | 1.36 (0.88–2.09)            |
| Nusa Tenggara                         | 0.81 (0.48–1.37)                   | 1.49 (0.59–3.76)                   | 1.57 (0.68–3.66)            |
| Kalimantan                            | 1.13 (0.69–1.84)                   | 1.5 (0.59–3.83)                    | 1.56 (0.71–3.47)            |
| Sulawesi                              | 1.02 (0.60–1.73)                   | 0.4 (0.08–2.07)                    | 1.18 (0.45–3.10)            |

Chronic diseases in IFLS5 included hypertension-diabetes mellitus-asthma-chronic heart diseases-mental health issue-stroke-liver diseases-cancer/malignancies-liver-arthritis-high cholesterol-prostate illness kidney diseases-digestive system diseases.

aOR: adjusted odds ratio, IRR: incidence rate ratio, NCD: non-communicable disease

\*\*\* p<0.01, \*\* p<0.05

641 **Table S8. Robustness check: The effect of multimorbidity on productivity loss (cross-**  
 642 **sectional analysis of 2014 IFLS)**

| Variables                         | Productivity loss                    |                                              |                                    |
|-----------------------------------|--------------------------------------|----------------------------------------------|------------------------------------|
|                                   | Labour participation<br>aOR (95% CI) | Days primary activity missed<br>IRR (95% CI) | Days stayed in bed<br>IRR (95% CI) |
| Number of NCDs (ref. no NCD)      |                                      |                                              |                                    |
| Single NCD                        | 0.76*** (0.65–0.89)                  | 1.48*** (1.29–1.70)                          | 1.32** (1.01–1.72)                 |
| Two NCDs                          | 0.54*** (0.45–0.65)                  | 2.42*** (2.09–2.80)                          | 2.18*** (1.60–2.97)                |
| Three or more NCDs                | 0.32*** (0.26–0.40)                  | 3.29*** (2.79–3.87)                          | 2.80*** (2.02–3.88)                |
| Sex (ref. Male)                   |                                      |                                              |                                    |
| Female                            | 0.31*** (0.27–0.35)                  | 1.05 (0.94–1.18)                             | 1.22 (0.97–1.54)                   |
| Age (ref. 50 – 60 years)          |                                      |                                              |                                    |
| 61 – 70 years                     | 0.40*** (0.34–0.46)                  | 0.97 (0.86–1.10)                             | 0.93 (0.72–1.21)                   |
| 71+ years                         | 0.15*** (0.13–0.18)                  | 1.19** (1.03–1.37)                           | 1.78*** (1.33–2.36)                |
| Marital status (ref. Not married) |                                      |                                              |                                    |
| Currently married                 | 1.22*** (1.05–1.41)                  | 1.07 (0.95–1.20)                             | 0.93 (0.72–1.21)                   |
| Primary                           | 1.08 (0.92–1.26)                     | 1.02 (0.90–1.17)                             | 1.03 (0.81–1.32)                   |
| Junior high school                | 0.64*** (0.51–0.81)                  | 1.02 (0.85–1.22)                             | 1.01 (0.64–1.61)                   |
| Senior high school                | 0.61*** (0.49–0.76)                  | 0.73*** (0.60–0.89)                          | 0.73 (0.46–1.15)                   |
| Tertiary                          | 1.09 (0.79–1.48)                     | 0.59*** (0.43–0.83)                          | 0.37*** (0.19–0.71)                |
| Ethnicity (ref. Javanese)         |                                      |                                              |                                    |
| Sundanese                         | 0.69*** (0.57–0.83)                  | 1.25*** (1.10–1.43)                          | 1.70*** (1.29–2.24)                |
| Others                            | 0.72*** (0.61–0.86)                  | 0.93 (0.81–1.07)                             | 1.34** (1.01–1.77)                 |
| Insurance coverage (ref. No)      |                                      |                                              |                                    |
| Yes                               | 0.91 (0.80–1.04)                     | 1.02 (0.92–1.13)                             | 0.87 (0.71–1.06)                   |
| Type of work (ref. Unemployed)    |                                      |                                              |                                    |
| Casual                            |                                      | 0.51*** (0.43–0.60)                          | 0.28*** (0.20–0.39)                |
| Self-employed                     |                                      | 0.55*** (0.49–0.63)                          | 0.33*** (0.26–0.42)                |
| Government/private                | n/a                                  | 0.44*** (0.37–0.54)                          | 0.22*** (0.14–0.33)                |
| Per capita expenditure (ref. Q1)  |                                      |                                              |                                    |
| Q2                                | 1.25** (1.03–1.52)                   | 1.02 (0.88–1.19)                             | 1.11 (0.82–1.51)                   |
| Q3                                | 1.17 (0.96–1.43)                     | 1.12 (0.95–1.32)                             | 0.8 (0.59–1.09)                    |
| Q4                                | 0.96 (0.79–1.17)                     | 0.95 (0.81–1.12)                             | 0.89 (0.66–1.21)                   |
| Q5                                | 1.07 (0.86–1.32)                     | 1.02 (0.86–1.20)                             | 0.83 (0.61–1.14)                   |
| Residency (ref. Rural)            |                                      |                                              |                                    |
| Urban                             | 0.57*** (0.50–0.65)                  | 1 (0.90–1.12)                                | 0.88 (0.72–1.09)                   |
| Region (ref. Java-Bali)           |                                      |                                              |                                    |
| Sumatra                           | 1.04 (0.87–1.23)                     | 1.12 (0.97–1.29)                             | 1.03 (0.78–1.36)                   |
| Nusa Tenggara                     | 1.17 (0.89–1.54)                     | 1.14 (0.92–1.42)                             | 0.91 (0.59–1.40)                   |
| Kalimantan                        | 1.42** (1.02–1.99)                   | 1.16 (0.91–1.48)                             | 0.73 (0.48–1.10)                   |
| Sulawesi                          | 0.59*** (0.43–0.79)                  | 1.39** (1.07–1.81)                           | 1.05 (0.70–1.59)                   |

Chronic diseases in IFLS included hypertension-diabetes mellitus-asthma-chronic heart diseases-mental health issue-stroke-liver diseases-cancer/malignancies-liver-arthritis-high cholesterol-prostate illness kidney diseases-digestive system diseases.

aOR: adjusted odds ratio, IRR: incidence rate ratio, NCD: non-communicable disease

\*\*\* p<0.01, \*\* p<0.05

643



645 **Table S9. Sensitivity analysis: the effect of multimorbidity on health service use**  
 646 Obesity (BMI  $\geq 25$  kg/m<sup>2</sup> as obese) is included in the clustering of multimorbidity

| Variables                                  | Health service use      |          |                                |          |                         |          |                                |          |  |
|--------------------------------------------|-------------------------|----------|--------------------------------|----------|-------------------------|----------|--------------------------------|----------|--|
|                                            | Outpatient              |          |                                |          | Inpatient               |          |                                |          |  |
|                                            | Any visit <sup>a)</sup> |          | Number of visits <sup>b)</sup> |          | Any visit <sup>a)</sup> |          | Number of visits <sup>b)</sup> |          |  |
|                                            | aOR (95% CI)            | p values | IRR (95% CI)                   | p values | aOR (95% CI)            | p values | IRR (95% CI)                   | p values |  |
| Number of NCDs (ref. no NCD)               |                         |          |                                |          |                         |          |                                |          |  |
| Single NCD                                 | 1.18 (0.98–1.43)        | 0.086    | 1.24 (1.04–1.50)               | 0.020    | 1.16 (0.79–1.70)        | 0.451    | 1.16 (0.79–1.70)               | 0.488    |  |
| Two NCDs                                   | 1.82 (1.47–2.25)        | 0.000    | 1.83 (1.50–2.25)               | 0.000    | 1.78 (1.18–2.69)        | 0.006    | 1.78 (1.18–2.69)               | 0.002    |  |
| Three or more NCDs                         | 3.27 (2.55–4.19)        | 0.000    | 2.85 (2.26–3.60)               | 0.000    | 2.73 (1.76–4.25)        | 0.000    | 2.73 (1.76–4.25)               | 0.000    |  |
| Period (ref.2007)                          |                         |          |                                |          |                         |          |                                |          |  |
| 2014                                       | 1.33 (1.15–1.53)        | 0.000    | 1.29 (1.12–1.49)               | 0.000    | 1.72 (1.29–2.29)        | 0.000    | 1.72 (1.29–2.29)               | 0.000    |  |
| Sex (ref. Male)                            |                         |          |                                |          |                         |          |                                |          |  |
| Female                                     | 1.19 (1.00–1.41)        | 0.049    | 1.13 (0.96–1.33)               | 0.139    | 0.91 (0.67–1.24)        | 0.537    | 0.91 (0.67–1.24)               | 0.413    |  |
| Age (ref. 50 – 60 years)                   |                         |          |                                |          |                         |          |                                |          |  |
| 61 – 70 years                              | 1.06 (0.90–1.26)        | 0.475    | 1.05 (0.89–1.23)               | 0.588    | 1.09 (0.79–1.50)        | 0.603    | 1.09 (0.79–1.50)               | 0.332    |  |
| 71+ years                                  | 1.20 (0.96–1.50)        | 0.109    | 1.15 (0.93–1.41)               | 0.187    | 1.58 (1.07–2.33)        | 0.020    | 1.58 (1.07–2.33)               | 0.020    |  |
| Marital status (ref. Not married)          |                         |          |                                |          |                         |          |                                |          |  |
| Currently married                          | 1.09 (0.92–1.31)        | 0.323    | 1.15 (0.97–1.36)               | 0.105    | 1.05 (0.77–1.44)        | 0.742    | 1.05 (0.77–1.44)               | 0.962    |  |
| Educational level (ref. No education)      |                         |          |                                |          |                         |          |                                |          |  |
| Primary                                    | 1.06 (0.88–1.27)        | 0.556    | 0.97 (0.82–1.16)               | 0.760    | 1.09 (0.78–1.51)        | 0.630    | 1.09 (0.78–1.51)               | 0.796    |  |
| Junior high school                         | 1.04 (0.78–1.40)        | 0.777    | 1.11 (0.85–1.46)               | 0.441    | 1.18 (0.73–1.92)        | 0.498    | 1.18 (0.73–1.92)               | 0.105    |  |
| Senior high school                         | 1.01 (0.76–1.35)        | 0.954    | 0.94 (0.72–1.23)               | 0.636    | 0.78 (0.47–1.29)        | 0.335    | 0.78 (0.47–1.29)               | 0.147    |  |
| Tertiary                                   | 1.18 (0.79–1.76)        | 0.427    | 0.84 (0.57–1.23)               | 0.371    | 0.94 (0.50–1.78)        | 0.858    | 0.94 (0.50–1.78)               | 0.495    |  |
| Ethnicity (ref. Javanese)                  |                         |          |                                |          |                         |          |                                |          |  |
| Sundanese                                  | 0.91 (0.72–1.16)        | 0.456    | 0.92 (0.74–1.15)               | 0.486    | 0.90 (0.59–1.37)        | 0.628    | 0.90 (0.59–1.37)               | 0.944    |  |
| Others                                     | 1.02 (0.85–1.24)        | 0.802    | 0.92 (0.77–1.09)               | 0.313    | 0.91 (0.65–1.28)        | 0.603    | 0.91 (0.65–1.28)               | 0.557    |  |
| Insurance coverage (ref. No)               |                         |          |                                |          |                         |          |                                |          |  |
| Yes                                        | 1.48 (1.27–1.73)        | 0.000    | 1.57 (1.36–1.81)               | 0.000    | 2.02 (1.52–2.69)        | 0.000    | 2.02 (1.52–2.69)               | 0.000    |  |
| Type of work (ref. Unemployed)             |                         |          |                                |          |                         |          |                                |          |  |
| Casual                                     | 0.77 (0.61–0.97)        | 0.025    | 0.66 (0.53–0.82)               | 0.000    | 0.48 (0.30–0.79)        | 0.003    | 0.48 (0.30–0.79)               | 0.001    |  |
| Self-employed                              | 0.83 (0.70–0.99)        | 0.041    | 0.76 (0.64–0.89)               | 0.001    | 0.60 (0.43–0.83)        | 0.002    | 0.60 (0.43–0.83)               | 0.001    |  |
| Government/private                         | 0.74 (0.56–0.98)        | 0.034    | 0.67 (0.52–0.88)               | 0.004    | 0.61 (0.36–1.02)        | 0.061    | 0.61 (0.36–1.02)               | 0.242    |  |
| Per capita household expenditure (ref. Q1) |                         |          |                                |          |                         |          |                                |          |  |
| Q2                                         | 1.48 (1.17–1.86)        | 0.001    | 1.50 (1.20–1.87)               | 0.000    | 1.26 (0.80–2.01)        | 0.322    | 1.26 (0.80–2.01)               | 0.500    |  |
| Q3                                         | 1.71 (1.35–2.15)        | 0.000    | 1.74 (1.39–2.17)               | 0.000    | 1.77 (1.14–2.76)        | 0.012    | 1.77 (1.14–2.76)               | 0.003    |  |
| Q4                                         | 1.70 (1.34–2.16)        | 0.000    | 1.77 (1.41–2.22)               | 0.000    | 1.44 (0.90–2.31)        | 0.131    | 1.44 (0.90–2.31)               | 0.092    |  |
| Q5                                         | 1.79 (1.39–2.31)        | 0.000    | 1.98 (1.56–2.51)               | 0.000    | 2.67 (1.68–4.26)        | 0.000    | 2.67 (1.68–4.26)               | 0.000    |  |
| Residency (ref. Rural)                     |                         |          |                                |          |                         |          |                                |          |  |
| Urban                                      | 0.87 (0.74–1.02)        | 0.093    | 0.92 (0.79–1.07)               | 0.258    | 0.96 (0.72–1.28)        | 0.775    | 0.96 (0.72–1.28)               | 0.689    |  |
| Region (ref. Java-Bali)                    |                         |          |                                |          |                         |          |                                |          |  |
| Sumatra                                    | 0.83 (0.67–1.03)        | 0.094    | 1.03 (0.85–1.26)               | 0.736    | 1.21 (0.84–1.75)        | 0.294    | 1.21 (0.84–1.75)               | 0.322    |  |
| Nusa Tenggara                              | 0.69 (0.48–0.99)        | 0.043    | 0.62 (0.44–0.87)               | 0.006    | 1.24 (0.69–2.22)        | 0.467    | 1.24 (0.69–2.22)               | 0.707    |  |
| Kalimantan                                 | 1.04 (0.71–1.50)        | 0.851    | 1.31 (0.94–1.83)               | 0.115    | 0.99 (0.50–1.97)        | 0.982    | 0.99 (0.50–1.97)               | 0.764    |  |
| Sulawesi                                   | 0.72 (0.48–1.07)        | 0.107    | 0.68 (0.47–0.99)               | 0.043    | 0.52 (0.22–1.22)        | 0.134    | 0.52 (0.22–1.22)               | 0.055    |  |

<sup>a)</sup> Multilevel logistic regression model

<sup>b)</sup> Multilevel negative binomial regression model

Obesity (BMI  $\geq 25$  kg/m<sup>2</sup> as obese) is included in the clustering of multimorbidity

aOR: adjusted odds ratio, IRR: Incidence rate ratio, NCD: non-communicable disease

647



648 **Table S10. Sensitivity analysis: the effect of multimorbidity on catastrophic expenditure**  
 649 Obesity (BMI  $\geq 25$  kg/m<sup>2</sup> as obese) is included in the clustering of multimorbidity

| Variables                                  | Catastrophic health expenditure                  |          |                                                  |          |                                           |          |
|--------------------------------------------|--------------------------------------------------|----------|--------------------------------------------------|----------|-------------------------------------------|----------|
|                                            | 10% of total household expenditure <sup>a)</sup> |          | 25% of total household expenditure <sup>a)</sup> |          | 40% of non-food expenditure <sup>a)</sup> |          |
|                                            | aOR (95% CI)                                     | p values | aOR (95% CI)                                     | p values | aOR (95% CI)                              | p values |
| Number of NCDs (ref. no NCD)               |                                                  |          |                                                  |          |                                           |          |
| Single NCD                                 | 1.12 (0.84–1.51)                                 | 0.434    | 0.89 (0.54–1.47)                                 | 0.642    | 0.93 (0.62–1.41)                          | 0.743    |
| Two NCDs                                   | 1.23 (0.88–1.72)                                 | 0.235    | 1.27 (0.74–2.17)                                 | 0.382    | 1.22 (0.77–1.91)                          | 0.396    |
| Three or more NCDs                         | 1.66 (1.12–2.45)                                 | 0.011    | 0.99 (0.50–1.94)                                 | 0.976    | 1.08 (0.63–1.88)                          | 0.773    |
| Period (ref.2007)                          |                                                  |          |                                                  |          |                                           |          |
| 2014                                       | 1.37 (1.09–1.74)                                 | 0.008    | 1.21 (0.81–1.81)                                 | 0.351    | 1.16 (0.84–1.62)                          | 0.367    |
| Sex (ref. Male)                            |                                                  |          |                                                  |          |                                           |          |
| Female                                     | 0.92 (0.72–1.19)                                 | 0.528    | 1.00 (0.64–1.54)                                 | 0.991    | 1.01 (0.70–1.45)                          | 0.949    |
| Age (ref. 50 – 60 years)                   |                                                  |          |                                                  |          |                                           |          |
| 61 – 70 years                              | 1.18 (0.91–1.53)                                 | 0.207    | 1.47 (0.95–2.29)                                 | 0.085    | 1.49 (1.03–2.16)                          | 0.033    |
| 71+ years                                  | 1.08 (0.77–1.53)                                 | 0.651    | 0.87 (0.45–1.67)                                 | 0.672    | 1.37 (0.83–2.25)                          | 0.218    |
| Marital status (ref. Not married)          |                                                  |          |                                                  |          |                                           |          |
| Currently married                          | 1.54 (1.15–2.05)                                 | 0.003    | 1.66 (1.01–2.71)                                 | 0.044    | 1.82 (1.21–2.72)                          | 0.004    |
| Educational level (ref. No education)      |                                                  |          |                                                  |          |                                           |          |
| Primary                                    | 0.93 (0.70–1.23)                                 | 0.607    | 0.87 (0.53–1.44)                                 | 0.596    | 0.88 (0.59–1.31)                          | 0.530    |
| Junior high school                         | 0.88 (0.57–1.35)                                 | 0.555    | 1.04 (0.51–2.09)                                 | 0.921    | 0.67 (0.35–1.28)                          | 0.227    |
| Senior high school                         | 0.85 (0.55–1.29)                                 | 0.442    | 1.05 (0.53–2.07)                                 | 0.885    | 0.82 (0.45–1.47)                          | 0.500    |
| Tertiary                                   | 0.39 (0.18–0.84)                                 | 0.016    | 0.13 (0.02–0.96)                                 | 0.045    | 0.18 (0.04–0.75)                          | 0.018    |
| Ethnicity (ref. Javanese)                  |                                                  |          |                                                  |          |                                           |          |
| Sundanese                                  | 0.83 (0.57–1.21)                                 | 0.339    | 1.64 (0.91–2.95)                                 | 0.099    | 1.17 (0.71–1.94)                          | 0.529    |
| Others                                     | 0.75 (0.56–1.02)                                 | 0.069    | 0.96 (0.57–1.60)                                 | 0.872    | 0.72 (0.47–1.10)                          | 0.129    |
| Insurance coverage (ref. No)               |                                                  |          |                                                  |          |                                           |          |
| Yes                                        | 0.94 (0.74–1.20)                                 | 0.613    | 0.83 (0.54–1.27)                                 | 0.388    | 0.80 (0.56–1.15)                          | 0.227    |
| Type of work (ref. Unemployed)             |                                                  |          |                                                  |          |                                           |          |
| Casual                                     | 0.62 (0.42–0.91)                                 | 0.016    | 0.59 (0.31–1.14)                                 | 0.116    | 0.56 (0.33–0.95)                          | 0.032    |
| Self-employed                              | 0.64 (0.47–0.87)                                 | 0.005    | 0.65 (0.41–1.03)                                 | 0.068    | 0.66 (0.45–0.97)                          | 0.033    |
| Government/private                         | 0.61 (0.38–0.97)                                 | 0.038    | 0.77 (0.37–1.61)                                 | 0.488    | 0.63 (0.33–1.22)                          | 0.169    |
| Per capita household expenditure (ref. Q1) |                                                  |          |                                                  |          |                                           |          |
| Q2                                         | 1.11 (0.74–1.65)                                 | 0.619    | 1.40 (0.66–2.94)                                 | 0.379    | 1.54 (0.85–2.77)                          | 0.151    |
| Q3                                         | 1.46 (0.99–2.15)                                 | 0.058    | 1.74 (0.85–3.58)                                 | 0.130    | 1.67 (0.93–2.99)                          | 0.086    |
| Q4                                         | 2.01 (1.34–3.01)                                 | 0.001    | 2.58 (1.27–5.26)                                 | 0.009    | 2.42 (1.36–4.31)                          | 0.003    |
| Q5                                         | 3.27 (2.10–5.11)                                 | 0.000    | 4.64 (2.29–9.38)                                 | 0.000    | 4.71 (2.66–8.34)                          | 0.000    |
| Residency (ref. Rural)                     |                                                  |          |                                                  |          |                                           |          |
| Urban                                      | 0.99 (0.74–1.31)                                 | 0.936    | 0.85 (0.52–1.40)                                 | 0.526    | 0.88 (0.59–1.32)                          | 0.550    |
| Region (ref. Java-Bali)                    |                                                  |          |                                                  |          |                                           |          |
| Sumatra                                    | 0.82 (0.58–1.16)                                 | 0.257    | 0.78 (0.43–1.41)                                 | 0.411    | 1.12 (0.70–1.78)                          | 0.633    |
| Nusa Tenggara                              | 0.70 (0.37–1.35)                                 | 0.287    | 1.22 (0.39–3.77)                                 | 0.730    | 0.87 (0.33–2.29)                          | 0.772    |
| Kalimantan                                 | 0.86 (0.46–1.59)                                 | 0.632    | 0.77 (0.26–2.30)                                 | 0.637    | 0.96 (0.40–2.26)                          | 0.918    |
| Sulawesi                                   | 0.83 (0.43–1.61)                                 | 0.584    | 1.00 (0.36–2.79)                                 | 0.994    | 1.08 (0.44–2.63)                          | 0.864    |

<sup>a)</sup> Multilevel logistic regression model

Obesity (BMI  $\geq 25$  kg/m<sup>2</sup> as obese) is included in the clustering of multimorbidity

aOR: adjusted odds ratio, NCD: non-communicable disease

650  
651  
652**Table S11. Sensitivity analysis: the effect of multimorbidity on productivity loss**Obesity (BMI  $\geq 25$  kg/m<sup>2</sup> as obese) is included in the clustering of multimorbidity

| Variables                                  | Productivity loss                  |          |                                            |          |                                  |          |
|--------------------------------------------|------------------------------------|----------|--------------------------------------------|----------|----------------------------------|----------|
|                                            | Labour participation <sup>a)</sup> |          | Days primary activity missed <sup>b)</sup> |          | Days stayed in bed <sup>b)</sup> |          |
|                                            | aOR (95% CI)                       | p values | IRR (95% CI)                               | p values | IRR (95% CI)                     | p values |
| Number of NCDs (ref. no NCD)               |                                    |          |                                            |          |                                  |          |
| Single NCD                                 | 0.66 (0.54–0.82)                   | 0.000    | 1.16 (0.99–1.36)                           | 0.063    | 1.10 (0.82–1.48)                 | 0.533    |
| Two NCDs                                   | 0.45 (0.35–0.58)                   | 0.000    | 1.70 (1.41–2.04)                           | 0.000    | 1.37 (0.98–1.92)                 | 0.065    |
| Three or more NCDs                         | 0.37 (0.27–0.49)                   | 0.000    | 2.21 (1.76–2.76)                           | 0.000    | 2.16 (1.44–3.25)                 | 0.000    |
| Period (ref. 2007)                         |                                    |          |                                            |          |                                  |          |
| 2014                                       | 0.76 (0.65–0.89)                   | 0.001    | 1.54 (1.35–1.75)                           | 0.000    | 1.44 (1.13–1.85)                 | 0.004    |
| Sex (ref. Male)                            |                                    |          |                                            |          |                                  |          |
| Female                                     | 0.22 (0.17–0.27)                   | 0.000    | 0.96 (0.83–1.11)                           | 0.555    | 0.90 (0.68–1.20)                 | 0.480    |
| Age (ref. 50 – 60 years)                   |                                    |          |                                            |          |                                  |          |
| 61 – 70 years                              | 0.36 (0.29–0.44)                   | 0.000    | 1.02 (0.89–1.18)                           | 0.758    | 1.15 (0.87–1.52)                 | 0.336    |
| 71+ years                                  | 0.10 (0.08–0.13)                   | 0.000    | 1.17 (0.97–1.41)                           | 0.094    | 1.77 (1.24–2.52)                 | 0.002    |
| Marital status (ref. Not married)          |                                    |          |                                            |          |                                  |          |
| Currently married                          | 1.49 (1.22–1.82)                   | <0.0001  | 1.18 (1.01–1.37)                           | 0.032    | 0.96 (0.72–1.29)                 | 0.809    |
| Educational level (ref. No education)      |                                    |          |                                            |          |                                  |          |
| Primary                                    | 0.90 (0.72–1.13)                   | 0.372    | 0.92 (0.79–1.07)                           | 0.269    | 1.03 (0.77–1.38)                 | 0.851    |
| Junior high school                         | 0.41 (0.29–0.58)                   | <0.0001  | 0.91 (0.71–1.16)                           | 0.438    | 0.68 (0.42–1.10)                 | 0.118    |
| Senior high school                         | 0.43 (0.30–0.61)                   | <0.0001  | 0.64 (0.50–0.83)                           | 0.001    | 0.65 (0.40–1.04)                 | 0.073    |
| Tertiary                                   | 0.56 (0.34–0.92)                   | 0.021    | 0.52 (0.36–0.75)                           | <0.0001  | 0.42 (0.20–0.88)                 | 0.022    |
| Ethnicity (ref. Javanese)                  |                                    |          |                                            |          |                                  |          |
| Sundanese                                  | 0.48 (0.36–0.65)                   | <0.0001  | 1.39 (1.14–1.70)                           | 0.001    | 1.51 (1.03–2.21)                 | 0.035    |
| Others                                     | 0.80 (0.63–1.01)                   | 0.059    | 1.13 (0.97–1.33)                           | 0.123    | 1.13 (0.84–1.53)                 | 0.425    |
| Insurance coverage (ref. No)               |                                    |          |                                            |          |                                  |          |
| Yes                                        | 0.82 (0.69–0.98)                   | 0.032    | 1.13 (0.99–1.29)                           | 0.077    | 1.13 (0.88–1.46)                 | 0.329    |
| Type of work (ref. Unemployed)             |                                    |          |                                            |          |                                  |          |
| Casual                                     | N/A                                | N/A      | 0.69 (0.57–0.84)                           | <0.0001  | 0.41 (0.28–0.60)                 | <0.0001  |
| Self-employed                              | N/A                                | N/A      | 0.68 (0.58–0.79)                           | <0.0001  | 0.51 (0.38–0.69)                 | <0.0001  |
| Government/private                         | N/A                                | N/A      | 0.60 (0.47–0.76)                           | <0.0001  | 0.56 (0.35–0.90)                 | 0.017    |
| Per capita household expenditure (ref. Q1) |                                    |          |                                            |          |                                  |          |
| Q2                                         | 1.36 (1.06–1.75)                   | 0.016    | 1.03 (0.85–1.24)                           | 0.769    | 0.97 (0.68–1.38)                 | 0.848    |
| Q3                                         | 1.27 (0.98–1.64)                   | 0.071    | 1.17 (0.97–1.42)                           | 0.095    | 1.11 (0.78–1.59)                 | 0.557    |
| Q4                                         | 1.13 (0.86–1.47)                   | 0.383    | 1.05 (0.86–1.29)                           | 0.602    | 0.99 (0.68–1.43)                 | 0.944    |
| Q5                                         | 1.35 (1.01–1.80)                   | 0.043    | 1.26 (1.02–1.55)                           | 0.032    | 0.89 (0.60–1.33)                 | 0.577    |
| Residency (ref. Rural)                     |                                    |          |                                            |          |                                  |          |
| Urban                                      | 0.42 (0.34–0.52)                   | <0.0001  | 0.92 (0.80–1.06)                           | 0.239    | 0.69 (0.52–0.90)                 | 0.006    |
| Region (ref. Java-Bali)                    |                                    |          |                                            |          |                                  |          |
| Sumatra                                    | 0.91 (0.70–1.20)                   | 0.519    | 1.14 (0.95–1.38)                           | 0.162    | 1.10 (0.78–1.55)                 | 0.573    |
| Nusa Tenggara                              | 0.68 (0.44–1.04)                   | 0.077    | 0.86 (0.64–1.15)                           | 0.309    | 1.15 (0.66–2.00)                 | 0.629    |
| Kalimantan                                 | 1.22 (0.75–1.99)                   | 0.418    | 0.86 (0.63–1.17)                           | 0.329    | 0.92 (0.51–1.67)                 | 0.794    |
| Sulawesi                                   | 0.34 (0.21–0.55)                   | <0.0001  | 1.05 (0.76–1.46)                           | 0.754    | 1.07 (0.58–1.98)                 | 0.826    |

a) Multilevel logistic regression model

b) Multilevel negative binomial regression model

aOR: adjusted odds ratio, IRR: incidence rate ratio, NCD: non-communicable disease

1  
2  
3  
4  
5  
6  
7  
8  
9  
10  
11  
12  
13  
14  
15  
16  
17  
18  
19  
20  
21  
22  
23  
24  
25  
26  
27  
28  
29  
30  
31  
32  
33  
34  
35  
36  
37  
38  
39  
40  
41  
42  
43  
44  
45  
46  
47  
48  
49  
50  
51  
52  
53  
54  
55  
56  
57  
58  
59  
60

653

For peer review only

**Table S1. STROBE Statement**

|                           | Item | Recommendation                                                                                                                                                                                                                                                                                                                                                                                                                                                         | Reported on page | Relevant text from manuscript                                                                                                                                                     |
|---------------------------|------|------------------------------------------------------------------------------------------------------------------------------------------------------------------------------------------------------------------------------------------------------------------------------------------------------------------------------------------------------------------------------------------------------------------------------------------------------------------------|------------------|-----------------------------------------------------------------------------------------------------------------------------------------------------------------------------------|
| <b>Title and abstract</b> | 1    | (a) Indicate the study's design with a commonly used term in the title or the abstract                                                                                                                                                                                                                                                                                                                                                                                 | 2                | "Panel Data Analysis"                                                                                                                                                             |
|                           |      | (b) Provide in the abstract an informative and balanced summary of what was done and what was found                                                                                                                                                                                                                                                                                                                                                                    | 3                | "Multimorbidity is associated with substantial direct and indirect costs to individuals, households, and the wider society."                                                      |
| <b>Introduction</b>       |      |                                                                                                                                                                                                                                                                                                                                                                                                                                                                        |                  |                                                                                                                                                                                   |
| Background d/rationale    | 2    | Explain the scientific background and rationale for the investigation being reported                                                                                                                                                                                                                                                                                                                                                                                   | 4, 5             | "Evidence from high-income countries (HICs) has found that..."                                                                                                                    |
| Objectives                | 3    | State specific objectives, including any prespecified hypotheses                                                                                                                                                                                                                                                                                                                                                                                                       | 5,6              | "to examine multimorbidity levels, and their relation to households' socioeconomic characteristics, health service use, catastrophic health expenditures, and productivity loss." |
| <b>Methods</b>            |      |                                                                                                                                                                                                                                                                                                                                                                                                                                                                        |                  |                                                                                                                                                                                   |
| Study design              | 4    | Present key elements of study design early in the paper                                                                                                                                                                                                                                                                                                                                                                                                                | 6                | "The study used panel data from two waves of the Indonesian Family Life Survey (IFLS)."                                                                                           |
| Setting                   | 5    | Describe the setting, locations, and relevant dates, including periods of recruitment, exposure, follow-up, and data collection                                                                                                                                                                                                                                                                                                                                        | 6                | "Waves 5 was conducted between September 2014–March 2015."                                                                                                                        |
| Participants              | 6    | (a) <i>Cohort study</i> —Give the eligibility criteria, and the sources and methods of selection of participants. Describe methods of follow-up<br><i>Case-control study</i> —Give the eligibility criteria, and the sources and methods of case ascertainment and control selection. Give the rationale for the choice of cases and controls<br><i>Cross-sectional study</i> —Give the eligibility criteria, and the sources and methods of selection of participants | 6                | "We included respondents aged 50 years and above in 2014, excluded those who did not participate in both Waves 4 and 5, and those with missing values for the study variable."    |
|                           |      | (b) <i>Cohort study</i> —For matched studies, give matching criteria and number of exposed and unexposed<br><i>Case-control study</i> —For matched studies, give matching criteria and the number of controls per case                                                                                                                                                                                                                                                 |                  | N/A                                                                                                                                                                               |
| Variables                 | 7    | Clearly define all outcomes, exposures, predictors, potential confounders, and effect modifiers. Give diagnostic criteria, if applicable                                                                                                                                                                                                                                                                                                                               | 7–9              | In "variables" subsection.                                                                                                                                                        |
| Data sources/             | 8*   | For each variable of interest, give sources of data and details of methods of assessment (measurement). Describe comparability of                                                                                                                                                                                                                                                                                                                                      | 7–9              | In "variables" subsection. Details of the                                                                                                                                         |

|                                                                                                                      | <b>Item</b>            | <b>Recommendation</b>                                                                                                                                                                                                                                                                                     | <b>Reported on page</b> | <b>Relevant text from manuscript</b>                                                                                                                                                                                       |
|----------------------------------------------------------------------------------------------------------------------|------------------------|-----------------------------------------------------------------------------------------------------------------------------------------------------------------------------------------------------------------------------------------------------------------------------------------------------------|-------------------------|----------------------------------------------------------------------------------------------------------------------------------------------------------------------------------------------------------------------------|
| 1<br>2<br>3<br>4<br>5<br>6<br>7<br>8<br>9<br>10<br>11<br>12<br>13<br>14<br>15<br>16<br>17                            | measurement            | assessment methods if there is more than one group                                                                                                                                                                                                                                                        |                         | measurements are available in Table S2                                                                                                                                                                                     |
| 18<br>19<br>20<br>21<br>22<br>23<br>24<br>25<br>26<br>27<br>28<br>29<br>30<br>31                                     | Bias                   | 9 Describe any efforts to address potential sources of bias                                                                                                                                                                                                                                               | 10                      | “Taking into account the hierarchical (nested) nature of the dataset (i.e. observations nested within individuals, and individuals nested within households, and districts), a multilevel level model approach was used.”  |
| 32<br>33<br>34<br>35<br>36<br>37<br>38<br>39<br>40<br>41<br>42<br>43<br>44<br>45<br>46<br>47<br>48<br>49<br>50<br>51 | Study size             | 10 Explain how the study size was arrived at                                                                                                                                                                                                                                                              | 10                      | Our final sample is 3,678 respondents (the sample flowchart is presented in Figure S1).                                                                                                                                    |
| 52<br>53<br>54<br>55                                                                                                 | Quantitative variables | 11 Explain how quantitative variables were handled in the analyses. If applicable, describe which groupings were chosen and why                                                                                                                                                                           | 7                       | In “variables” subsection, i.e. “A total of 10 NCDs were used to quantify the number of NCDs (0, 1, 2, 3 or more) and respondents with two or more NCDs were categorized as having multimorbidity (categorized as 0 or 1)” |
| 56<br>57<br>58<br>59<br>60                                                                                           | Statistical methods    | 12 (a) Describe all statistical methods, including those used to control for confounding                                                                                                                                                                                                                  | 10                      | In “statistical analysis” subsection. For example “..., adjusting for covariates”                                                                                                                                          |
|                                                                                                                      |                        | (b) Describe any methods used to examine subgroups and interactions                                                                                                                                                                                                                                       | 10                      | “We described the patterns of multimorbidity across different population subgroups...”                                                                                                                                     |
|                                                                                                                      |                        | (c) Explain how missing data were addressed                                                                                                                                                                                                                                                               | 7                       | “...excluded those who did not participate in both Waves 4 and 5, and those with missing values for the study”                                                                                                             |
|                                                                                                                      |                        | (d) <i>Cohort study</i> —If applicable, explain how loss to follow-up was addressed<br><i>Case-control study</i> —If applicable, explain how matching of cases and controls was addressed<br><i>Cross-sectional study</i> —If applicable, describe analytical methods taking account of sampling strategy | 7                       | “...excluded those who did not participate in both Waves 4 and 5, and those with missing values for the study”                                                                                                             |
|                                                                                                                      |                        | (e) Describe any sensitivity analyses                                                                                                                                                                                                                                                                     | 10                      | “We conducted two robustness analyses.”                                                                                                                                                                                    |
|                                                                                                                      | <b>Results</b>         |                                                                                                                                                                                                                                                                                                           |                         |                                                                                                                                                                                                                            |
|                                                                                                                      | Participants           | 13* (a) Report numbers of individuals at each stage of study—eg numbers potentially eligible, examined for eligibility, confirmed eligible, included in the study, completing follow-up, and analysed                                                                                                     | 32                      | Figure S1: Sampling flow chart                                                                                                                                                                                             |

|                   | Item | Recommendation                                                                                                                                                                                               | Reported on page | Relevant text from manuscript                                                                                                                                                                                   |
|-------------------|------|--------------------------------------------------------------------------------------------------------------------------------------------------------------------------------------------------------------|------------------|-----------------------------------------------------------------------------------------------------------------------------------------------------------------------------------------------------------------|
|                   |      | (b) Give reasons for non-participation at each stage                                                                                                                                                         | 32               | Figure S1: Sampling flow chart                                                                                                                                                                                  |
|                   |      | (c) Consider use of a flow diagram                                                                                                                                                                           | 32               | Figure S1: Sampling flow chart                                                                                                                                                                                  |
| Descriptive data  | 14*  | (a) Give characteristics of study participants (eg demographic, clinical, social) and information on exposures and potential confounders                                                                     | 32               | Figure S1: Sampling flow chart                                                                                                                                                                                  |
|                   |      | (b) Indicate number of participants with missing data for each variable of interest                                                                                                                          | 32               | Figure S1: Sampling flow chart                                                                                                                                                                                  |
|                   |      | (c) <i>Cohort study</i> —Summarise follow-up time (eg, average and total amount)                                                                                                                             | 32               | Figure S1: Sampling flow chart                                                                                                                                                                                  |
| Outcome data      | 15*  | <i>Cohort study</i> —Report numbers of outcome events or summary measures over time                                                                                                                          | 26               | Table 1 and Table 2                                                                                                                                                                                             |
|                   |      | <i>Case-control study</i> —Report numbers in each exposure category, or summary measures of exposure                                                                                                         |                  | N/A                                                                                                                                                                                                             |
|                   |      | <i>Cross-sectional study</i> —Report numbers of outcome events or summary measures                                                                                                                           |                  |                                                                                                                                                                                                                 |
| Main results      | 16   | (a) Give unadjusted estimates and, if applicable, confounder-adjusted estimates and their precision (eg, 95% confidence interval). Make clear which confounders were adjusted for and why they were included | 27–30            | Table 2 – Table 5. For example, “Respondents with a single NCD were 1.61 times more likely (95% CI 1.21–2.14) to have experienced an outpatient visit in the past four weeks compared to those without an NCD.” |
|                   |      | (b) Report category boundaries when continuous variables were categorized                                                                                                                                    | 37–38            | Table S2: List of variables for 2007 and 2014 IFLS analyses                                                                                                                                                     |
|                   |      | (c) If relevant, consider translating estimates of relative risk into absolute risk for a meaningful time period                                                                                             |                  | N/A                                                                                                                                                                                                             |
| Other analyses    | 17   | Report other analyses done—eg analyses of subgroups and interactions, and sensitivity analyses                                                                                                               | 42–47            | Tables S6–11. For example, “Our robustness analysis using cross-sectional analysis using 2014 cross-sectional dataset that consists of 14 physical NCDs (Tables S6–8) showed consistent results”                |
| <b>Discussion</b> |      |                                                                                                                                                                                                              |                  |                                                                                                                                                                                                                 |

|  | <b>Item</b>              | <b>Recommendation</b>                                                                                                                                                         | <b>Reported on page</b> | <b>Relevant text from manuscript</b>                                                                                                                                                   |
|--|--------------------------|-------------------------------------------------------------------------------------------------------------------------------------------------------------------------------|-------------------------|----------------------------------------------------------------------------------------------------------------------------------------------------------------------------------------|
|  | Key results              | 18 Summarise key results with reference to study objectives                                                                                                                   | 16                      | “Multimorbidity was associated with higher use of healthcare services, higher probability of catastrophic health expenditure, and a reduction in productivity.”                        |
|  | Limitations              | 19 Discuss limitations of the study, taking into account sources of potential bias or imprecision. Discuss both direction and magnitude of any potential bias                 | 18–19                   | “There are several limitations to our study.”                                                                                                                                          |
|  | Interpretation           | 20 Give a cautious overall interpretation of results considering objectives, limitations, multiplicity of analyses, results from similar studies, and other relevant evidence | 18–19                   | “Our findings should be interpreted with caution since the assessment of chronic diseases was mostly based on self-reporting and may cause under- or over-reporting of the prevalence” |
|  | Generalisability         | 21 Discuss the generalisability (external validity) of the study results                                                                                                      | 19                      | “This research intentionally focused on the older population due to a significantly higher burden of NCDs in this population group.”                                                   |
|  | <b>Other information</b> |                                                                                                                                                                               |                         |                                                                                                                                                                                        |
|  | Funding                  | 22 Give the source of funding and the role of the funders for the present study and, if applicable, for the original study on which the present article is based              | 20                      | Funding<br>“This research received no specific grant from any funding agency in the public, commercial or not-for-profit sectors”                                                      |

# BMJ Open

## Impact of noncommunicable disease multimorbidity on health service use, catastrophic health expenditure, and productivity loss in Indonesia: a population-based panel data analysis study

|                                 |                                                                                                                                                                                                                                                                                                                                                                                                                                                                                                                                                                                                                                                                                                                                                                                                                                                                                                                                                                                                                                                                                                                                                                                                                                                                                                                                                                                                                                            |
|---------------------------------|--------------------------------------------------------------------------------------------------------------------------------------------------------------------------------------------------------------------------------------------------------------------------------------------------------------------------------------------------------------------------------------------------------------------------------------------------------------------------------------------------------------------------------------------------------------------------------------------------------------------------------------------------------------------------------------------------------------------------------------------------------------------------------------------------------------------------------------------------------------------------------------------------------------------------------------------------------------------------------------------------------------------------------------------------------------------------------------------------------------------------------------------------------------------------------------------------------------------------------------------------------------------------------------------------------------------------------------------------------------------------------------------------------------------------------------------|
| Journal:                        | <i>BMJ Open</i>                                                                                                                                                                                                                                                                                                                                                                                                                                                                                                                                                                                                                                                                                                                                                                                                                                                                                                                                                                                                                                                                                                                                                                                                                                                                                                                                                                                                                            |
| Manuscript ID                   | bmjopen-2020-041870.R1                                                                                                                                                                                                                                                                                                                                                                                                                                                                                                                                                                                                                                                                                                                                                                                                                                                                                                                                                                                                                                                                                                                                                                                                                                                                                                                                                                                                                     |
| Article Type:                   | Original research                                                                                                                                                                                                                                                                                                                                                                                                                                                                                                                                                                                                                                                                                                                                                                                                                                                                                                                                                                                                                                                                                                                                                                                                                                                                                                                                                                                                                          |
| Date Submitted by the Author:   | 23-Dec-2020                                                                                                                                                                                                                                                                                                                                                                                                                                                                                                                                                                                                                                                                                                                                                                                                                                                                                                                                                                                                                                                                                                                                                                                                                                                                                                                                                                                                                                |
| Complete List of Authors:       | <p>Marthias, Tiara; The University of Melbourne, Nossal Institute for Global Health; Gadjah Mada University, Department of Public Health, Faculty of Medicine, Public Health and Nursing</p> <p>Anindya, Kanya; The University of Melbourne, Nossal Institute for Global Health</p> <p>Ng, Nawi ; University of Gothenburg, Department of Public Health and Community Medicine</p> <p>McPake, Barbara; The University of Melbourne, Nossal Institute for Global Health</p> <p>Atun, Rifat; Harvard University T H Chan School of Public Health, Department of Global Health and Population</p> <p>Arfyanto, Hafiz ; SMERU Research Institute</p> <p>Hulse, Emily ; The University of Melbourne, Centre for Health Policy, School of Population and Global Health</p> <p>Zhao, Yang; The University of Melbourne, Nossal Institute for Global Health, The University of Melbourne; Peking University Health Science Centre, The George Institute for Global Health</p> <p>Jusril, Hafizah; Universitas Indonesia, Center for Health Research</p> <p>Pan, Tianxin; The University of Melbourne, Center for Health Policy, School of Population and Global Health</p> <p>Ishida, Marie; The University of Melbourne, Nossal Institute for Global Health</p> <p>Lee, John; The University of Melbourne, Nossal Institute for Global Health; Imperial College London, Department of Primary Care and Public Health, School of Public Health</p> |
| <b>Primary Subject Heading</b>: | Health policy                                                                                                                                                                                                                                                                                                                                                                                                                                                                                                                                                                                                                                                                                                                                                                                                                                                                                                                                                                                                                                                                                                                                                                                                                                                                                                                                                                                                                              |
| Secondary Subject Heading:      | Public health, Health policy, Health economics                                                                                                                                                                                                                                                                                                                                                                                                                                                                                                                                                                                                                                                                                                                                                                                                                                                                                                                                                                                                                                                                                                                                                                                                                                                                                                                                                                                             |
| Keywords:                       | PUBLIC HEALTH, Health policy < HEALTH SERVICES ADMINISTRATION & MANAGEMENT, Health economics < HEALTH SERVICES ADMINISTRATION & MANAGEMENT                                                                                                                                                                                                                                                                                                                                                                                                                                                                                                                                                                                                                                                                                                                                                                                                                                                                                                                                                                                                                                                                                                                                                                                                                                                                                                 |
|                                 |                                                                                                                                                                                                                                                                                                                                                                                                                                                                                                                                                                                                                                                                                                                                                                                                                                                                                                                                                                                                                                                                                                                                                                                                                                                                                                                                                                                                                                            |



1  
2  
3  
4  
5  
6  
7  
8  
9  
10  
11  
12  
13  
14  
15  
16  
17  
18  
19  
20  
21  
22  
23  
24  
25  
26  
27  
28  
29  
30  
31  
32  
33  
34  
35  
36  
37  
38  
39  
40  
41  
42  
43  
44  
45  
46  
47  
48  
49  
50  
51  
52  
53  
54  
55  
56  
57  
58  
59  
60

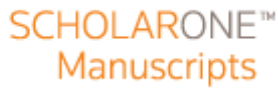



I, the Submitting Author has the right to grant and does grant on behalf of all authors of the Work (as defined in the below author licence), an exclusive licence and/or a non-exclusive licence for contributions from authors who are: i) UK Crown employees; ii) where BMJ has agreed a CC-BY licence shall apply, and/or iii) in accordance with the terms applicable for US Federal Government officers or employees acting as part of their official duties; on a worldwide, perpetual, irrevocable, royalty-free basis to BMJ Publishing Group Ltd ("BMJ") its licensees and where the relevant Journal is co-owned by BMJ to the co-owners of the Journal, to publish the Work in this journal and any other BMJ products and to exploit all rights, as set out in our [licence](#).

The Submitting Author accepts and understands that any supply made under these terms is made by BMJ to the Submitting Author unless you are acting as an employee on behalf of your employer or a postgraduate student of an affiliated institution which is paying any applicable article publishing charge ("APC") for Open Access articles. Where the Submitting Author wishes to make the Work available on an Open Access basis (and intends to pay the relevant APC), the terms of reuse of such Open Access shall be governed by a Creative Commons licence – details of these licences and which [Creative Commons](#) licence will apply to this Work are set out in our licence referred to above.

Other than as permitted in any relevant BMJ Author's Self Archiving Policies, I confirm this Work has not been accepted for publication elsewhere, is not being considered for publication elsewhere and does not duplicate material already published. I confirm all authors consent to publication of this Work and authorise the granting of this licence.

1  
2  
3  
4  
5  
6  
7  
8  
9  
10  
11  
12  
13  
14  
15  
16  
17  
18  
19  
20  
21  
22  
23  
24  
25  
26  
27  
28  
29  
30  
31  
32  
33  
34  
35  
36  
37  
38  
39  
40  
41  
42  
43  
44  
45  
46  
47  
48  
49  
50  
51  
52  
53  
54  
55  
56  
57  
58  
59  
60

1 **Impact of noncommunicable disease multimorbidity on health service**  
2 **use, catastrophic health expenditure, and productivity loss in**  
3 **Indonesia: a population-based panel data analysis study**

4  
5 Tiara Marthias<sup>†1,2</sup>, Kanya Anindya<sup>†\*1</sup>, Nawi Ng<sup>3</sup>, Barbara McPake<sup>1</sup>, Rifat Atun<sup>4</sup>, Hafiz  
6 Arfyanto<sup>5</sup>, Emily S G Hulse<sup>6</sup>, Yang Zhao<sup>1,7</sup>, Hafizah Jusril<sup>8</sup>, Tianxin Pan<sup>6</sup>, Marie  
7 Ishida<sup>1</sup>, John Tayu Lee<sup>1,9</sup>

8  
9 **Affiliations**

10 <sup>1</sup>Nossal Institute for Global Health, The University of Melbourne, Melbourne, Australia  
11 <sup>2</sup>Department of Public Health, Faculty of Medicine, Public Health and Nursing, Universitas Gadjah  
12 Mada, Yogyakarta, Indonesia <sup>3</sup>Department of Public Health and Community Medicine, University  
13 of Gothenburg, Sweden <sup>4</sup>Department of Global Health and Population, Harvard T.H. Chan School  
14 of Public Health, Harvard University, Boston, MA, USA <sup>5</sup>SMeRU Research Institute, Jakarta,  
15 Indonesia <sup>6</sup>Center for Health Policy, School of Population and Global Health, The University of  
16 Melbourne, Melbourne, Australia <sup>7</sup>The George Institute for Global Health, Peking University Health  
17 Science Center, Beijing, China <sup>8</sup>Center for Health Research, Faculty of Public Health, Universitas  
18 Indonesia, Depok, Indonesia <sup>9</sup>Department of Primary Care and Public Health, School of Public  
19 Health, Imperial College London, United Kingdom

20  
21 <sup>†</sup> Co-first author (both contributed equally)

22 <sup>\*</sup> Corresponding author

23 Postal address: The Nossal Institute for Global Health, level 5, 333 Exhibition Street,  
24 Melbourne, Victoria 3010 Australia.

25 E-mail address: kanindya@student.unimelb.edu.au

26 Telephone number: +62 878 9966 9201

27 **Word count: 4004**

1  
2  
3 **29 Abstract**

4  
5 **30 Objectives**

6  
7  
8 31 To examine noncommunicable diseases (NCDs) multimorbidity levels, and their  
9  
10 32 relation to households' socioeconomic characteristics, health service use, catastrophic  
11  
12 33 health expenditures, and productivity loss.  
13  
14  
15 34

16  
17 **35 Method**

18  
19 36 We utilised a panel dataset from two waves of the Indonesian Family Life Survey  
20  
21 37 (IFLS) conducted in 2007 and 2014. IFLS is an ongoing longitudinal survey that is  
22  
23 38 representative of 83% of the total population in Indonesia. We included respondents  
24  
25 39 aged 50 years old and above in 2007 who participated in both waves. The total number  
26  
27 40 of participants in this study are 3,678 respondents. Our main outcomes are health  
28  
29 41 service use (outpatient and inpatient care), financial burden (catastrophic health  
30  
31 42 expenditure), and productivity loss (labour participation, days primary activity missed,  
32  
33 43 days stayed in bed). We applied multilevel logistic regression and negative binomial  
34  
35 44 regression models to assess the associations between NCD multimorbidity and the  
36  
37 45 binary outcome variables and count variables, respectively.  
38  
39  
40  
41  
42  
43  
44  
45  
46  
47

48  
49 **47 Results**

50  
51 48 Women were more likely to have NCD multimorbidity than men and the prevalence of  
52  
53 49 multimorbidity increased with higher socioeconomic status. NCD multimorbidity was  
54  
55 50 associated with a substantially higher number of outpatient visits (compared with those  
56  
57 51 without NCDs, incidence rate ratio [IRR] 4.30, 95% CI 3.37–5.47 for individuals with  
58  
59 52 three or more NCDs), a higher number of hospital visits (IRR 5.76, 95% CI 3.11–10.66  
60  
53 for individuals with three or more NCDs). NCD multimorbidity was also associated

1  
2  
3 54 with a greater likelihood of experiencing catastrophic health expenditure (for three or  
4  
5 55 more NCDs, adjusted odds ratio [aOR] 1.69, 95% CI 1.02–2.81) and lower participation  
6  
7 56 in the labour force (aOR 0.18, 95% CI 0.10–0.34) compared to those without NCDs.  
8  
9

10 57

## 11 58 **Conclusions**

12  
13  
14 59 NCD multimorbidity is associated with substantial direct and indirect costs to  
15  
16  
17 60 individuals, households, and the wider society. Our study highlights the importance of  
18  
19 61 preparing health systems for addressing the burden of multimorbidity in LMICs.  
20  
21

22 62

23  
24 63 **Keywords** Multimorbidity, Indonesia, noncommunicable diseases, health service use,  
25  
26 64 catastrophic health expenditure, productivity loss.  
27  
28  
29  
30  
31  
32  
33  
34  
35  
36  
37  
38  
39  
40  
41  
42  
43  
44  
45  
46  
47  
48  
49  
50  
51  
52  
53  
54  
55  
56  
57  
58  
59  
60

### Strengths and limitations of this study

- To our knowledge, our study provides the first comprehensive analysis using the single largest longitudinal survey in Indonesia, which examined the impact of multimorbidity on health service use, catastrophic health expenditure, and productivity loss.
- This study applied multilevel mixed-effects regression models to examine factors associated with multimorbidity and its relationship to the outcome variables, while taking into account the hierarchical (nested) nature of the dataset.
- Our findings should be interpreted with caution since the assessment of NCDs was mostly based on self-reporting, which may not capture the true prevalence rate .
- Despite the fifth waves of IFLS dataset was conducted between 2014 and 2015, the longitudinal design of the survey is extremely useful for measuring the impact of chronic diseases, accounting for within-individual variations over-time.

65

### 66 Introduction

67 Noncommunicable diseases (NCDs) continues to be the leading cause of global burden  
68 of diseases, with 78% of NCD-related mortality concentrated in low-income and  
69 middle-income countries (LMICs).<sup>1</sup> The current COVID-19 pandemic highlights that  
70 the presence of NCDs can increase the fatality risk of a communicable disease.<sup>2</sup> In  
71 Indonesia, the third most populous country among LMICs (after China and India) with  
72 a population of 273 million, has seen rapid demographic and epidemiological  
73 transitions over the last few decades. The threat of NCDs is expected to rise with the  
74 aging population (population aged 65 or above), which is projected to account for a  
75 quarter of the population by 2070.<sup>3</sup> Concurrently, the prevalence of NCD  
76 multimorbidity, defined as the presence of two or more NCDs, is expected to rise  
77 rapidly in many LMICs, as both life expectancy and exposure to risk factors increase.<sup>4</sup>  
78 Indonesia has started recognising the burden of NCDs due to its substantial contribution  
79 to the top causes of death and disability-adjusted life years (DALYs).<sup>5</sup> However, current  
80 Indonesia health programs remain limited to curative services, focusing on single

1  
2  
3 81 chronic disease as opposed to assessing and mitigating the impact of multimorbidity on  
4  
5 82 the individual, health system and wider society.  
6  
7  
8 83

9  
10 84 COVID-19 pandemic emphasises the importance of health systems responsiveness to  
11  
12 85 multimorbidity. Historically, the growing burden of multimorbidity in LMICs were  
13  
14 86 highlighted in the United Nations High-Level Meetings on NCDs in 2011, 2014, and  
15  
16  
17 87 2018.<sup>6</sup> LMICs typically have low levels of government expenditure for health and  
18  
19 88 inadequate health insurance coverage, which often results in higher levels of out-of-  
20  
21 89 pocket expenditure (OOPE) and risk of impoverishing patients with chronic health  
22  
23 90 conditions.<sup>7,8</sup> The economic burden of multimorbidity is further compounded by the  
24  
25  
26 91 fact that multiple healthcare specialists typically manage multimorbid patients in  
27  
28 92 LMICs.<sup>9</sup> This leads to inefficiencies with numerous different hospital visits,  
29  
30 93 polypharmacy, and suboptimal disease management.<sup>9,10</sup>  
31  
32  
33 94

34  
35 95 While the Indonesian health system is mainly funded by the government, it only spends  
36  
37 96 around 2% of its GDP on health, which is significantly lower than other LMICs with  
38  
39 97 comparable income level.<sup>11</sup> Approximately half of all health spending is covered by the  
40  
41 98 public sector and one-third comes from OOP payment.<sup>12</sup> While the primary health care  
42  
43 99 (PHC) centres are designed as gatekeepers for primary prevention for NCDs, studies  
44  
45 100 have found limited capacity of PHC in proper management of NCDs.<sup>13–15</sup> There is also  
46  
47 101 high public funding allocations to curative services at the hospital-level,<sup>16</sup> with limited  
48  
49 102 investment in preventive and promotive health services.<sup>12</sup> Further, the poor and those  
50  
51 103 living in limited-resource regions have generally lower hospital utilisation due to  
52  
53  
54 104 geographical barriers and high transportation costs.<sup>17,18</sup> Low overall government health  
55  
56  
57  
58  
59  
60

1  
2  
3 105 spending, coupled with limited investment in PHC and the high burden of NCDs may  
4  
5 106 further increase the high OOPE in Indonesia and inequitable access to care.<sup>5</sup>  
6  
7  
8 107

9  
10 108 The Indonesian national health insurance program expansion in 2014 was designed to  
11  
12 109 achieve universal coverage by 2019.<sup>19</sup> However, as of August 2020, the insurance  
13  
14 110 coverage was only at 85.5%,<sup>20</sup> leaving around 40 million people remain uncovered.  
15  
16  
17 111 Furthermore, the program has been in funding deficit since its inception and recent  
18  
19 112 studies identified that the insurance program may not be financially sustainable.<sup>1,2</sup>  
20  
21 113 Further, NCDs were responsible for around 60% of total spending of the insurance  
22  
23 114 program. Therefore, addressing NCDs through preventive and promotive programs is  
24  
25 115 pertinent to strengthen the Indonesian health system and the sustainability of its health  
26  
27 116 insurance program.  
28  
29

30 117  
31  
32  
33 118 Evidence from high-income countries (HICs) has found that apart from the negative  
34  
35 119 impact on health outcomes, multimorbidity imposes substantial economic costs on  
36  
37 120 individuals and households. This is because patients with multimorbidity incur large  
38  
39 121 medical expenditures and are more likely to be absent from work.<sup>8,21,22</sup> However, there  
40  
41 122 is no previous study in Indonesia that has examined the economic burden of NCD  
42  
43 123 multimorbidity, as earlier studies have focused on the burden of a single NCD.<sup>23</sup> Results  
44  
45 124 from this study may inform health systems reform across the region and be applicable  
46  
47 125 to similar LMICs. We present the first study that uses longitudinal data to examine  
48  
49 126 NCD multimorbidity levels, and their relationship to households' socioeconomic  
50  
51 127 characteristics, health service use, catastrophic health expenditures, and productivity  
52  
53 128 loss.  
54  
55  
56  
57

58 129  
59  
60



1  
2  
3 130 **Methods**

4  
5 131 **Sample and data**

6  
7  
8 132 We utilised panel data from two waves of the Indonesian Family Life Survey (IFLS)  
9  
10 133 conducted in 2007 (Wave 4) and 2014 (Wave 5). IFLS is an ongoing longitudinal  
11  
12 134 survey that started in 1993 with four subsequent rounds of data collection (1997/1998,  
13  
14 135 2000, 2007/2008, and 2014). The original sample was based on 13 out of 27 provinces  
15  
16 136 in 1993, representing 83% of the population. Wave 5 was conducted between  
17  
18 137 September 2014–March 2015, with 76% re-contact rate from the main respondents of  
19  
20 138 Wave 1. The dataset contains information at the individual- and household-level ,  
21  
22 139 including sociodemographic characteristics, healthcare utilisation and expenditure, and  
23  
24 140 labour participation. The objectives and methods of the IFLS are detailed  
25  
26 141 elsewhere.<sup>24,25</sup> This study included respondents aged 50 years and above in 2007 who  
27  
28 142 participated in both Waves 4 and 5, and excluded those with missing values for the  
29  
30 143 study variable. Our final sample is 3,678 respondents and a sample flowchart is  
31  
32 144 presented in Figure S1.  
33  
34  
35  
36  
37

38 145 **Variables**

39  
40  
41 146 **Multimorbidity**

42  
43 147 Our main variable of interest was multimorbidity. Fourteen types of NCDs were  
44  
45 148 included in Wave 5, but only 10 NCDs in Wave 4. For consistency, our main analysis  
46  
47 149 used 10 NCDs that were available in both waves, as the following: hypertension,  
48  
49 150 diabetes, asthma, heart attack/coronary heart diseases, liver disease, stroke, cancer,  
50  
51 151 arthritis/rheumatism, hypercholesterolemia, and depression/mental illness. The four  
52  
53 152 NCDs that were only included in Wave 5 were: prostate diseases, kidney diseases  
54  
55 153 (excluding malignancy), digestive diseases, and memory-related diseases.  
56  
57  
58  
59  
60

1  
2  
3 155 NCD status was either identified through self-reporting or physical examination. In the  
4  
5 156 self-report section, respondents who answered affirmatively to the question, “Has a  
6  
7 157 doctor/paramedic/nurse/midwife ever told you that you had any of these conditions?”,  
8  
9 158 were defined as reporting an NCD. For hypertension and hypercholesterolemia, the  
10  
11 159 diagnoses were confirmed through a physical examination conducted by trained nurses,  
12  
13 160 i.e. blood pressure and total cholesterol levels. All IFLS respondents aged 15 years and  
14  
15 161 older had their blood pressure recorded three times on alternate arms using Omron self-  
16  
17 162 inflating sphygmomanometers by trained nurses.<sup>24,25</sup> In our analysis, a respondent was  
18  
19 163 categorised as having hypertension if the mean measurement of systolic blood pressure  
20  
21 164 was 140 mm Hg and/or mean diastolic blood pressure was 90 mm Hg or the respondent  
22  
23 165 self-reported having been diagnosed with hypertension.<sup>26</sup> We also included  
24  
25 166 hypercholesterolemia, defined as total blood cholesterol value 240 mg/dl, as  
26  
27 167 morbidity.<sup>27</sup> It is important to note that different measurements of hypercholesterolemia  
28  
29 168 were used in Wave 4 and 5. Blood test for total cholesterol was performed in Wave 4  
30  
31 169 as opposed to self-reporting of hypercholesterolemia in Wave 5.  
32  
33  
34  
35  
36  
37  
38  
39  
40

41 171 A total of 10 NCDs were used to quantify the number of NCDs (0, 1, 2, 3 or more) and  
42  
43 172 respondents with two or more NCDs were categorised as having multimorbidity (0 or  
44  
45 173 1). Previous studies have typically considered hypertension, obesity, and  
46  
47 174 hypercholesterolemia as risk factors of NCDs and their inclusion in the multimorbidity  
48  
49 175 clustering remains inconsistent.<sup>23,28</sup> Therefore, in the sensitivity analysis, we included  
50  
51 176 obesity, defined as having BMI  $\geq 25$  kg/m<sup>2</sup>, in the clustering of multimorbidity.<sup>29</sup> All  
52  
53 177 statistical analyses were conducted using STATA 13.0.  
54  
55  
56  
57  
58  
59  
60

1  
2  
3 180 ***Outcome variables***  
4

5 181 The three main outcomes are: health service use and financial burden as the direct cost  
6  
7 182 and productivity loss as the indirect cost of multimorbidity. Respondents were asked  
8  
9 183 about the number of outpatient visits (in the last four weeks) and inpatient visits (in the  
10  
11 184 last 12 months) and OOPE. The data on OOPE was also collected with four weeks and  
12  
13 185 12 months recall period for outpatient and inpatient visits, respectively. We calculated  
14  
15 186 the total annual OOPE by multiplying OOPE for outpatient visits with 13 (as the  
16  
17 187 reference period of outpatient expenditure in the IFLS is four weeks and a year consists  
18  
19 188 of 52 weeks), and added OOPE for inpatient visits. The total OOPE reflects all costs  
20  
21 189 associated with outpatient or inpatient visits, including medication, medical  
22  
23 190 consultation, and laboratory tests.  
24  
25  
26  
27  
28  
29

30 191  
31 192 Catastrophic health expenditure occurs when OOPE exceed certain thresholds of a  
32  
33 193 household's expenditure. The thresholds used in this study were 10% and 25% of total  
34  
35 194 household expenditure (as proposed by the Sustainable Development Goal 3 targets),  
36  
37 195 and the WHO's recommendation at 40% of household's capacity to pay. Capacity to  
38  
39 196 pay is defined as the household's ability to pay for other expenses, including medical  
40  
41 197 costs, after having household subsistence needs met.<sup>30</sup> Household subsistence needs are  
42  
43 198 proxied by the household non-food expenditure variable. Catastrophic health  
44  
45 199 expenditure () occurrence is expressed as follows:  
46  
47  
48

49 200 
$$cata_h = 1 \text{ if } \frac{HS_h}{THE_h} \text{ or } \frac{HS_h}{CTP_h} > z, \text{ and otherwise is zero.}$$

50  
51  
52 201 Where  $HS_h$  is the total OOPE for health,  $THE_h$  is the total household expenditure,  $CTP_h$   
53  
54 202 is capacity to pay, and  $z$  is the threshold of capacity to pay. In using the proportion of  
55  
56 203 total OOPE for health to total household expenditure (THE), the threshold  $z$  was set at  
57  
58 204 10% and 25%. Further, in using the proportion of OOPE for health to capacity to pay  
59  
60

1  
2  
3 205 (CTP), the threshold  $z$  was set at 40%. All monetary values were adjusted for inflation  
4  
5 206 and converted to 2014 International Dollars.<sup>31</sup>  
6  
7  
8 207

9  
10 208 Productivity loss was assessed based on: (1) labour participation; (2) the number of  
11  
12 209 days of primary activity missed due to poor health; and (3) number of days confined to  
13  
14 210 bed. Labour participation status was defined as the respondent's employment status at  
15  
16 211 the time of the survey. The number of days of primary daily activity missed and days  
17  
18 212 confined to bed were included in the health conditions section of the survey, with a four  
19  
20 213 week recall period.  
21  
22  
23  
24 214

### 25 26 215 ***Covariates***

27  
28 216 Sociodemographic factors included were: sex, age groups (50-60, 61-70, above 70  
29  
30 217 years), marital status (currently and not currently married), education (no education,  
31  
32 218 primary, junior high school, senior high school, tertiary), ethnicity (Javanese,  
33  
34 219 Sundanese, others), coverage of health insurance (no, yes), type of work (unemployed,  
35  
36 220 casual, self-employed, government/private), and respondents' economic status (per  
37  
38 221 capita expenditure for consumption). The economic status was categorised into  
39  
40 222 quintiles: q1 (lowest) to q5 (highest). We also included residency (rural, urban), region  
41  
42 223 of residency (Java-Bali, Sumatra, Nusa Tenggara, Kalimantan, Sulawesi), and period  
43  
44 224 (using wave 2007 as the reference group) as covariates. Detailed definitions and  
45  
46 225 categorisations are available in Table S1. It should be noted that IFLS did not include  
47  
48 226 the eastern regions, Papua and West Papua, which are considered to be underdeveloped.  
49  
50  
51  
52  
53  
54 227

## 228 **Statistical analysis**

229 We described the patterns of multimorbidity across different population subgroups and  
230 presented the weighted percentages with 95% confidence interval (CI). Taking into  
231 account the hierarchical (nested) nature of the dataset (i.e. observations nested within  
232 individuals, and individuals nested within households, and districts),<sup>32</sup> a multilevel  
233 level model approach was used to examine factors associated with multimorbidity and  
234 its relation to the outcome variables. Multilevel negative binomial regression models  
235 were performed to examine the association between multimorbidity and the numbers  
236 of outpatient visits and days in the hospital. We used negative binomial models instead  
237 of Poisson models due to the over-dispersion of the count data variable. We applied  
238 multilevel logistic regression models to observe binary outcome variables and  
239 calculated the intra-class correlation coefficients (ICC). The multilevel analyses were  
240 conducted using unweighted data, since rather than deriving nationally representative  
241 estimates, our aim was on testing the association between multimorbidity and the  
242 outcomes and examine the mixed effects.<sup>33</sup> We conducted a robustness check to  
243 investigate the association between multimorbidity and costs using the 2014 cross-  
244 sectional dataset, that contains information for four additional NCDs than the 2007  
245 Wave.

## 246 **Patient and public involvement**

247 Neither patients nor the public were involved in this secondary data analysis.

248

## 249 **Results**

### 250 **Descriptive statistics**

251 Table 1 and Table S2 presents the respondents' characteristics by multimorbidity status  
252 in 2007 and 2014. The median age in 2007 was 58 years (IQR 54–65), 53.9% were

1  
2  
3 253 female, 74.4% were married, 16.5% had at least secondary education level or above  
4  
5 254 and only 25.5% had health insurance coverage. In 2014, the median age was 65 years  
6  
7 255 (IQR 60–72), and health insurance coverage increased to 42.8%.  
8  
9

10 256

11  
12 257 A similar prevalence of NCD multimorbidity was observed between 2007 (21.0%, 95%  
13  
14 258 CI 19.6–22.6) and 2014 (22.0%, 95% CI 20.6–23.6). The prevalence of multimorbidity  
15  
16 259 increased with rising socioeconomic status. For example, in 2014, the prevalence  
17  
18 260 increased from 18.0% (95% CI 16.9–20.7) to 41.2% (95% CI 31.6–51.6) between  
19  
20 261 respondents with no education and those with tertiary education. Similarly, the  
21  
22 262 prevalence increased from 13.5% (95% CI 11.1–16.2) to 36.2% (95% CI 32.2–40.5)  
23  
24 263 between the lowest and highest wealth quintiles. The trend of increasing multimorbidity  
25  
26 264 was observed for all age groups, shown in Figure 1, where the fifth and fourth wealth  
27  
28 265 quintiles had a higher prevalence of NCD multimorbidity than the lower quintiles. The  
29  
30 266 prevalence of multimorbidity by level of education is available in Figure S2.  
31  
32

33 267

34  
35  
36  
37 268 The regression results show that NCD multimorbidity was more likely among those  
38  
39 269 with higher socioeconomic status (Table 1). Respondents in the highest wealth quintile  
40  
41 270 were more likely to report NCD multimorbidity, compared with those in the lowest  
42  
43 271 quintile (aOR 2.22, 95% CI 1.72–2.86). Compared with those with lower educational  
44  
45 272 attainment, respondents with higher educational attainment were more likely to  
46  
47 273 experience NCD multimorbidity (aOR 1.54, 95% CI 1.01–2.34 for tertiary level  
48  
49 274 completed). Additionally, the prevalence of multimorbidity was higher in females than  
50  
51 275 males (aOR 1.74, 95% CI 1.46–2.08) and those living in urban areas (aOR 1.41, 95%  
52  
53 276 CI 1.19–1.67). The ICC shows that above 53% ( $1 - [0.34 + 0.13]$ ) of the variance can be  
54  
55 277 ascribed to between-individual level differences (Table S3).  
56  
57  
58  
59  
60

## 278 **Multimorbidity and health service use**

279 The probability of using outpatient and inpatient care and the number of visits increased  
280 with more NCD diagnoses (Table 2, Table 3). Respondents with a single NCD were  
281 1.35 times more likely (95% CI 1.15–1.58) to have experienced an outpatient visit in  
282 the past four weeks compared to those without an NCD. The odds of an outpatient visit  
283 increased to 4.66 times (95% CI 3.55–6.11), while the incidence rate increased by 4.25  
284 times (95% CI 3.33–5.42) in those with three or more NCDs. Furthermore, the  
285 incidence of inpatient visits was 3.68 times (95% CI 2.21–6.12) higher in those with  
286 three or more NCDs, compared to those without an NCD.

287  
288 We reported the results of ICC in Table S3. We found that 14% and 11% of the variance  
289 in the outpatient visit were attributable to the differences within-individuals and  
290 households, respectively. Between-individual variation accounted for the largest  
291 variation, where it explained 75% (1-[0.14+0.11]) and 65% (1-[0.25+0.12]) of  
292 outpatient and inpatient visit, respectively. No influence of district-level variables was  
293 found (ICC=0).

## 295 **Multimorbidity and financial burden**

296 The mean OOPE for outpatient care incurred by respondents during the last four weeks  
297 increased from INT\$17 in those without any NCDs to INT\$60 in those with three or  
298 more NCDs in 2014 (Table 2). Similarly, for inpatient visits, having three or more  
299 NCDs resulted in a higher mean OOPE of \$762 (SD ±\$1,421) compared to \$566 (SD  
300 ±\$1,880) for those without any NCDs. The total annual OOPE also increased from \$295  
301 (SD ±\$977), among those without any NCDs, to \$968 (SD ±\$4,313) among those with  
302 three or more NCDs. Table 2 also presents the proportion of respondents with

1  
2  
3 303 catastrophic health expenditure using different thresholds. The results using 10% and  
4  
5 304 25% of THE, and 40% of non-food consumption thresholds found that households with  
6  
7  
8 305 more than two NCDs had a higher proportion of catastrophic health expenditure  
9  
10 306 compared to households without any member having any NCDs.

11  
12 307

13  
14 308 Table 4 presents the logistic regression results for the proportion of respondents who  
15  
16 309 experienced catastrophic health expenditure using different thresholds. At 10% of THE  
17  
18 310 as the threshold, having two NCDs increases the odds of catastrophic health  
19  
20 311 expenditure to 1.58 times (95% CI 1.06–2.35), compared to having no NCDs. These  
21  
22 312 odds increased to 1.69 times for those having three NCDs or more (95% CI 1.02–2.81).  
23  
24 313 At the 25% and 40% thresholds, we found no significant association between the  
25  
26 314 number of NCD and the incidence of catastrophic health expenditure.  
27  
28  
29  
30

31 315

### 32 316 **Multimorbidity and productivity loss**

33  
34 317 More NCDs diagnoses were associated with greater productivity loss (Table 2, Table  
35  
36 318 5). For example, among those aged 50–60 years old, only 49.8% (95% CI 36.7–62.9)  
37  
38 319 of respondents with three or more NCDs were employed, compared with 84.3% (95%  
39  
40 320 CI 79.8–88.0) of respondents without NCDs (Table 2). The mean number of days of  
41  
42 321 primary daily activity missed increased from 2.7 days (SD  $\pm$ 6.0), for those without any  
43  
44 322 NCDs, to 10.1 days (SD  $\pm$ 12.1) for those with three or more NCDs. The mean number  
45  
46 323 of days confined to bed also increased among those with three or more NCDs.  
47  
48  
49  
50

51 324

52  
53  
54 325 Individuals diagnosed with three or more NCDs were 0.23 times less likely (95% CI  
55  
56 326 0.16–0.33) to be employed compared to those without NCDs (Table 5). Compared with  
57  
58 327 those without NCD, being diagnosed with three or more NCDs were expected to have  
59  
60



1  
2  
3 328 a higher incidence rate of missing days of primary activity (IRR 2.59, 95% CI 1.97–  
4  
5 329 3.41) as well as days spent in bed (IRR 2.64, 95% CI 1.60–4.36). We found that 48%  
6  
7  
8 330 of the variance in labour participation was due to within-individual variations, while  
9  
10 331 between-individual variation accounted for 23% ( $1 - [0.48 + 0.28 + 0.01]$ ) (Table S3).

11  
12  
13 332

### 14 15 333 **Robustness check**

16  
17 334 Our robustness analysis using 2014 cross-sectional dataset that consists of 14 physical  
18  
19  
20 335 NCDs (Table S4–7) showed consistent results with our original findings. Higher  
21  
22 336 household expenditure and higher education were associated with greater burden of  
23  
24 337 multimorbidity. Multimorbidity was also associated with higher health care use, higher  
25  
26 338 incidence of catastrophic health expenditures, and lower productivity. The association  
27  
28 339 between multimorbidity and catastrophic health expenditure was more pronounced in  
29  
30 340 the cross-sectional analysis. Our inclusion of obesity in the clustering of multimorbidity  
31  
32 341 also yields consistent results (Table S8–10).

33  
34  
35  
36  
37 342

### 38 39 40 343 **Discussion**

41  
42 344 Our study provides the first comprehensive analysis of multimorbidity in Indonesia  
43  
44 345 using the only large panel dataset in Indonesia. Our study reveals that almost one in  
45  
46 346 four of our study population has at least two NCDs, with 6.5% having three or more in  
47  
48 347 2014. Our findings show a higher prevalence of multimorbidity in wealthier population  
49  
50 348 groups. Multimorbidity was associated with a higher use of healthcare services, higher  
51  
52 349 probability of catastrophic health expenditure, and a reduction in productivity.

53  
54  
55  
56  
57 350  
58  
59  
60

1  
2  
3 351 Analyses of socioeconomic gradients of NCDs in HICs routinely find negative  
4  
5 352 socioeconomic gradients. However, this is not the case for LMICs, which have a more  
6  
7  
8 353 mixed pattern of the distribution of risk factors.<sup>34,35</sup> Other studies find a similar pattern  
9  
10 354 with diabetes and cardiovascular diseases in LMICs undergoing epidemiological  
11  
12 355 transition.<sup>35</sup> These conditions predominate in high-income quintiles in early stages of  
13  
14 356 transition, which may explain our findings on the higher prevalence of NCD  
15  
16 357 multimorbidity among more affluent population. We also found that obesity was more  
17  
18 358 prevalent in wealthier quintiles. As obesity is associated with several NCDs  
19  
20 359 (cardiovascular diseases, hypertension, stroke, cancer, arthritis and  
21  
22 360 hypercholesterolemia),<sup>36</sup> this may explain our findings on socioeconomic gradients of  
23  
24  
25 361 NCDs. Further, our results on socioeconomic patterning of multimorbidity can be  
26  
27 362 explained by the fact that higher-income and higher-educational groups have better  
28  
29 363 health literacy and access to healthcare services. And thus, are more likely to have  
30  
31 364 NCDs diagnosed than lower socio-income groups.  
32  
33  
34  
35  
36  
37

366 Our findings showing the association between having more NCDs and greater use of  
367 health services are in line with earlier studies from both HICs and LMICs.<sup>9,28,37</sup> The  
368 presence of NCD multimorbidity was also associated with a greater financial burden,  
369 which is mainly driven by higher healthcare use. These findings are consistent with  
370 earlier studies.<sup>10,28,37,38</sup> Based on a previous Indonesian study, four NCDs  
371 (hypertension, diabetes, heart problems, and stroke) are the leading causes of mortality  
372 and were estimated to account for 12% of Indonesia's OOPE in 2020.<sup>22</sup> Furthermore,  
373 the impoverishment effect of multimorbidity has been previously documented and is  
374 confirmed in our study.<sup>7,21,22,37</sup>

375  
58  
59  
60

1  
2  
3 376 This study contributes to the growing evidence that multimorbidity has a substantial  
4  
5 377 impact on disability and productivity.<sup>7,9,22</sup> Interventions that can help effectively  
6  
7 378 prevent and manage multimorbidity have the potential for generating substantial returns  
8  
9  
10 379 on improved health, work productivity and social benefits. However, a large portion of  
11  
12 380 the Indonesia government health expenditure is still geared towards curative care.<sup>5</sup>  
13  
14 381 Renewing the focus on health promotion and NCD prevention requires a strong PHC  
15  
16 382 system.<sup>9</sup> PHC is the entry point of a sustainable health system for the early detection of  
17  
18 383 risk factors and initiation of a treatment-seeking pathway for patients with NCDs, and  
19  
20 384 thus, plays a crucial role for NCD prevention and provision of long-term integrated  
21  
22 385 care. Such policies would be in line with the current program of the Ministry of Health  
23  
24 386 in Indonesia to reorient public PHC to provide more promotive and preventive health  
25  
26 387 services, such as through the implementation of Chronic Diseases Management  
27  
28 388 Program (Prolanis) in PHC.<sup>12,39</sup> However, the participation in this program remains low  
29  
30 389 due to the poor access to PHC facilities, especially in non-Java-Bali regions. Engaging  
31  
32 390 the private sector, which makes up 60% of health facilities in Indonesia, is warranted  
33  
34 391 to expand the coverage of NCD promotive and prevention activities.<sup>40</sup> Furthermore, the  
35  
36 392 development of digital health solution and telehealth for NCDs prevention and control  
37  
38 393 should be included in the national plan.<sup>41</sup>  
39  
40  
41  
42  
43  
44  
45  
46  
47  
48  
49  
50  
51  
52  
53  
54  
55  
56  
57  
58  
59  
60

395 Although most countries and international health organisations have recognised the  
396 importance of multimorbidity,<sup>42</sup> most health policies and programs still focus on single  
397 diseases, including in Indonesia. Therefore, health systems need to shift from single-  
398 disease models to new methods of financing and service delivery to more effectively  
399 manage multimorbidity.<sup>43,44</sup> At the primary health care level, this can be done through  
400 improved prevention and treatment of multimorbidity, underpinned by

1  
2  
3 401 multidisciplinary teams lead by general practitioners.<sup>42</sup> There is also a need to  
4  
5 402 strengthen the coordination of patient management between the primary and secondary  
6  
7 403 care. Similar to many LMICs and neighbouring countries in Asia, healthcare delivery  
8  
9 404 in Indonesia remains fragmented and hospital-centred, with little coordination among  
10  
11 405 healthcare providers across different tiers of the system.<sup>45</sup>  
12  
13  
14  
15 406

16  
17 407 Furthermore, under the current national health insurance scheme, the hospital  
18  
19 408 reimbursement system that uses case-based groups has created significant gaps between  
20  
21 409 reimbursable costs and actual hospital expenses.<sup>46</sup> The reimbursement system, which  
22  
23 410 is mainly based on primary diagnosis, limits the hospital's capacity and willingness to  
24  
25 411 treat complicated cases such as those with multimorbidity.<sup>47</sup> Thus, it is important to  
26  
27 412 develop a clinical guideline for multimorbidity in Indonesia and other LMICs, along  
28  
29 413 with payment systems that would ensure quality health services at both primary and  
30  
31 414 secondary levels of care for patients with multimorbidity.<sup>9,40</sup> It is also worth noting that  
32  
33 415 Indonesia is still facing the double burden of infectious and chronic diseases. Therefore,  
34  
35 416 multimorbidity care delivery model needs to pay attention to the management of NCDs  
36  
37 417 alongside infectious diseases.  
38  
39  
40  
41  
42  
43  
44

45 419 There are several limitations to our study. First, the IFLS-5 was conducted between  
46  
47 420 2014 and 2015, which may not be able to capture the current prevalence of  
48  
49 421 multimorbidity in Indonesia. Despite this limitation, IFLS is the only longitudinal  
50  
51 422 survey available in Indonesia that is useful to produce more accurate estimates  
52  
53 423 compared with using a cross-sectional dataset (e.g. the National Socioeconomic  
54  
55 424 Survey). Second, our findings should be interpreted with caution since the assessment  
56  
57 425 of NCDs was mostly based on self-reporting. This may cause misreporting of the true  
58  
59  
60

1  
2  
3 426 diagnoses and prevalence of multimorbidity. The health service use and OOPE were  
4  
5 427 also based on self-reporting and may be prone to recall bias.<sup>48</sup> The use of self-reported  
6  
7 428 diagnoses limits our assessment of the actual severity of the diseases, which may vary  
8  
9 429 across socioeconomic status. Future studies should consider using different datasets  
10  
11 430 (such as clinical dataset from the hospital) and applying clinical metrics such as  
12  
13 431 Charlson index, which could more objectively capture disease severity and predict the  
14  
15 432 health outcomes.<sup>49</sup> Third, the IFLS sample did not include Indonesia eastern regions.  
16  
17 433 There is a need to extend the multimorbidity assessment to the remaining regions.  
18  
19 434 Finally, this research intentionally focused on the older population due to a significantly  
20  
21 435 higher burden of NCDs in this population group. Future research should use cohort data  
22  
23 436 to follow patients over a more extended time period to examine the impact of  
24  
25 437 multimorbidity and its effects in younger population groups in LMICs.<sup>22</sup>  
26  
27  
28  
29  
30  
31  
32

### 33 **Conclusion**

34  
35 440 Multimorbidity poses substantial costs to individuals, households, health system, and  
36  
37 441 the wider society in Indonesia, which has an increasingly aging population.  
38  
39 442 Policymakers and employers in Indonesia should carefully design and invest in targeted  
40  
41 443 public health and workplace interventions at the individual and population level to avert  
42  
43 444 the adverse health and economic consequences of NCD multimorbidity.  
44  
45  
46  
47  
48  
49  
50  
51  
52  
53  
54  
55  
56  
57  
58  
59  
60

1  
2  
3 446 **Declarations**

4  
5 447 **Abbreviation**

6  
7 448 CHE: Catastrophic health expenditure; HICs: High-income countries; IFLS: Indonesian Family Life  
8  
9 449 Survey; LMICs: Low-middle income countries; NCDs: Noncommunicable diseases; OOPE: Out-  
10  
11 450 of-pocket expenditure; PHC: Primary health care.

12  
13 451 **Competing interests**

14  
15 452 The authors have declared that no competing interests exist.

16  
17 453 **Ethics approval**

18  
19 454 The IFLS has been approved by ethics review boards at RAND Corporation and Gadjah Mada  
20  
21 455 University in Indonesia. Written informed consent was sought from all respondents prior to data  
22  
23 456 collection. As this study used IFLS publicly available datasets that contain no personal identification  
24  
25 457 of the respondents, no further ethical approval was sought.

26  
27 458 **Author's contributions**

28  
29 459 Author's contributions: The aim of the research was developed by TM, KA, JL. The methodology  
30  
31 460 development and analysis were conducted by TM, KA, HA, TP, JL. EH assisted in drafting the  
32  
33 461 discussion section and proofread all section. YZ, HJ, MI contributed to background and discussion  
34  
35 462 section. NN, BM, RA, JL provided critical input in revising the manuscript. All authors reviewed,  
36  
37 463 edited and commented on multiple versions of the manuscript.

38  
39 464 **Availability of data and materials**

40  
41 465 The datasets are publicly accessible after registration ([https://www.rand.org/well-being/social-and-](https://www.rand.org/well-being/social-and-behavioral-policy/data/FLS/IFLS/access.html)  
42  
43 466 [behavioral-policy/data/FLS/IFLS/access.html](https://www.rand.org/well-being/social-and-behavioral-policy/data/FLS/IFLS/access.html)).

44  
45 467 **Acknowledgements**

46  
47 468 The authors of the paper express sincere gratitude to the RAND for providing access to the data.  
48  
49 469 We acknowledge Nur Arna Sucianti from SurveyMeter, for guiding us with data merging.

50  
51 470 **Funding**

52  
53 471 This research received no specific grant from any funding agency in the public, commercial or not-  
54  
55 472 for-profit sectors.

473 **References**

- 474 1 World Health Organization. Noncommunicable diseases country profiles 2018.  
475 World Health Organization, 2018 <https://apps.who.int/iris/handle/10665/274512>.  
476 (accessed Oct 10, 2019).
- 477 2 Zhang L, Sun W, Wang Y, *et al*. Clinical Course and Mortality of Stroke Patients  
478 With Coronavirus Disease 2019 in Wuhan, China. *Stroke* 2020; **51**: 2674–82.
- 479 3 United Nations, Department of Economic and Social Affairs, Population Division.  
480 World Population Prospects 2019, Online Edition. Rev. 1. 2019. UN DESA, 2019  
481 <https://population.un.org/wpp/Download/Standard/Population/> (accessed March 8,  
482 2020).
- 483 4 Hussain MA, Huxley RR, Al Mamun A. Multimorbidity prevalence and pattern in  
484 Indonesian adults: an exploratory study using national survey data. *BMJ open* 2015;  
485 **5**: e009810.
- 486 5 Mboi N, Surbakti IM, Trihandini I, *et al*. On the road to universal health care in  
487 Indonesia, 1990–2016: a systematic analysis for the Global Burden of Disease Study  
488 2016. *The Lancet* 2018; **392**: 581–591.
- 489 6 United Nations. Political declaration of the third high-level meeting of the General  
490 Assembly on the prevention and control of non-communicable diseases. United  
491 Nations, 2018 [https://www.un.org/en/ga/search/view\\_doc.asp?symbol=A/RES/73/2](https://www.un.org/en/ga/search/view_doc.asp?symbol=A/RES/73/2)  
492 (accessed March 8, 2020).
- 493 7 Sum G, Hone T, Atun R, *et al*. Multimorbidity and out-of-pocket expenditure on  
494 medicines: a systematic review. *BMJ global health* 2018; **3**: e000505.
- 495 8 Wang L, Si L, Cocker F, Palmer AJ, Sanderson K. A systematic review of cost-of-  
496 illness studies of multimorbidity. *Applied health economics and health policy* 2018;  
497 **16**: 15–29.
- 498 9 Barnett K, Mercer SW, Norbury M, Watt G, Wyke S, Guthrie B. Epidemiology of  
499 multimorbidity and implications for health care, research, and medical education: a  
500 cross-sectional study. *The Lancet* 2012; **380**: 37–43.
- 501 10 Salisbury C. Multimorbidity: redesigning health care for people who use it. *The*  
502 *Lancet* 2012; **380**: 7–9.
- 503 11 World Bank Group. Indonesia Health Financing System Assessment : Spend More,  
504 Right and Better. Washington, DC: World Bank, 2016  
505 <https://openknowledge.worldbank.org/handle/10986/25363> (accessed Sept 24,  
506 2020).
- 507 12 Gani A, Budiharsana M. The consolidated report on Indonesia health sector review  
508 2018. Jakarta, Indonesia: Bappenas, 2018.
- 509 13 Werdhani RA. Medical problem in Asia pacific and ways to solve it: The roles of  
510 primary care/family physician (Indonesia Xperience). *J Family Med Prim Care*  
511 2019; **8**: 1523–7.



- 1  
2  
3 512 14Rokx C. New insights into the provision of health services in Indonesia: A health  
4 513 workforce study. World Bank Publications, 2010  
5 514 <http://documents1.worldbank.org/curated/en/799111468038325818/pdf/538830PUB>  
6 515 [0Heal101Official0Use0Only1.pdf](http://documents1.worldbank.org/curated/en/799111468038325818/pdf/538830PUB0Heal101Official0Use0Only1.pdf).  
7  
8  
9 516 15Rajan VS, Patil A, Pambudi ES, Junedi B. Is Indonesia Ready to Serve? : An  
10 517 analysis of Indonesia's primary health care supply-side readiness. Washington,  
11 518 D.C. : World Bank Group: World Bank, 2018  
12 519 [http://documents.worldbank.org/curated/en/484351538653658243/Is-Indonesia-](http://documents.worldbank.org/curated/en/484351538653658243/Is-Indonesia-Ready-to-Serve-An-Analysis-of-Indonesia-s-Primary-Health-Care-Supply-Side-Readiness)  
13 520 [Ready-to-Serve-An-Analysis-of-Indonesia-s-Primary-Health-Care-Supply-Side-](http://documents.worldbank.org/curated/en/484351538653658243/Is-Indonesia-Ready-to-Serve-An-Analysis-of-Indonesia-s-Primary-Health-Care-Supply-Side-Readiness)  
14 521 [Readiness](http://documents.worldbank.org/curated/en/484351538653658243/Is-Indonesia-Ready-to-Serve-An-Analysis-of-Indonesia-s-Primary-Health-Care-Supply-Side-Readiness) (accessed March 20, 2019).  
15  
16 522 16Mahendradhata Y, Trisnantoro L, Dewi S, *et al.* The Republic of Indonesia Health  
17 523 System Review. India: World Health Organization, 2017  
18 524 <https://apps.who.int/iris/handle/10665/254716>.  
19  
20  
21 525 17Alatas V, Banerjee A, Hanna R, Olken BA, Tobias J. Targeting the Poor: Evidence  
22 526 from a Field Experiment in Indonesia. *American Economic Review* 2012; **102**:  
23 527 1206–40.  
24  
25 528 18Noerdin E. Transport, health services and budget allocation to address maternal  
26 529 mortality in rural Indonesia. *Transport and Communications Bulletin for Asia and*  
27 530 *the Pacific* 2014; **84**: 1–14.  
28  
29 531 19Agustina R, Dartanto T, Sitompul R, *et al.* Universal health coverage in Indonesia:  
30 532 concept, progress, and challenges. *The Lancet* 2018.  
31  
32 533 20BPJS Kesehatan. JKN coverage. 2020. <https://bpjs-kesehatan.go.id/bpjs/> (accessed  
33 534 Oct 1, 2020).  
34  
35 535 21Jaspers L, Colpani V, Chaker L, *et al.* The global impact of non-communicable  
36 536 diseases on households and impoverishment: a systematic review. *European Journal*  
37 537 *of Epidemiology* 2015; **30**: 163–88.  
38  
39 538 22Lee JT, Hamid F, Pati S, Atun R, Millett C. Impact of noncommunicable disease  
40 539 multimorbidity on healthcare utilisation and out-of-pocket expenditures in middle-  
41 540 income countries: cross sectional analysis. *PLoS One* 2015; **10**: e0127199.  
42  
43 541 23Finkelstein EA, Chay J, Bajpai S. The economic burden of self-reported and  
44 542 undiagnosed cardiovascular diseases and diabetes on Indonesian households. *PloS*  
45 543 *one* 2014; **9**: e99572.  
46  
47 544 24Strauss J, Witoelar F, Sikoki B. The Fifth Wave of the Indonesia Family Life  
48 545 Survey: Overview and Field Report: Volume 1. RAND Corporation, 2016  
49 546 DOI:10.7249/WR1143.1.  
50  
51 547 25Strauss J, Witoelar F, Sikoki B, Wattie A. The fourth wave of the Indonesian  
52 548 Family Life Survey (IFLS4): Overview and field report. RAND, 2009.  
53  
54 549 26Chobanian AV, Bakris GL, Black HR, *et al.* The seventh report of the joint  
55 550 national committee on prevention, detection, evaluation, and treatment of high blood  
56 551 pressure: the JNC 7 report. *Jama* 2003; **289**: 2560–2571.  
57  
58  
59  
60



- 1  
2  
3 552 27 Grundy SM, Cleeman JI, Merz CNB, *et al.* Implications of recent clinical trials for  
4 553 the national cholesterol education program adult treatment panel III guidelines.  
5 554 *Journal of the American College of Cardiology* 2004; **44**: 720–32.
- 6  
7  
8 555 28 Hussain MA, Huxley RR, Al Mamun A. Multimorbidity prevalence and pattern in  
9 556 Indonesian adults: an exploratory study using national survey data. *BMJ open* 2015;  
10 557 **5**: e009810.
- 11  
12 558 29 World Health Organization. The Asia-Pacific perspective: redefining obesity and  
13 559 its treatment. 2000.
- 14  
15 560 30 Xu K, Evans DB, Kawabata K, Zeramdini R, Klavus J, Murray CJ. Household  
16 561 catastrophic health expenditure: a multicountry analysis. *The Lancet* 2003; **362**:  
17 562 111–7.
- 18  
19  
20 563 31 Organisation for Economic Co-operation and Development (OECD). Purchasing  
21 564 power parities (PPP). OECD, 2019 <https://data.oecd.org/conversion/purchasing536>  
22 565 [power-parities-ppp.htm](https://data.oecd.org/conversion/purchasing536) (accessed Sept 10, 2019).
- 23  
24 566 32 Vaezghasemi M, Ng N, Eriksson M, Subramanian S. Households, the omitted level  
25 567 in contextual analysis: disentangling the relative influence of households and  
26 568 districts on the variation of BMI about two decades in Indonesia. *International*  
27 569 *journal for equity in health* 2016; **15**: 102.
- 28  
29  
30 570 33 Lee ES, Forthofer RN. Analyzing complex survey data. Sage, 2006.
- 31  
32 571 34 Hosseinpoor AR, Bergen N, Kunst A, *et al.* Socioeconomic inequalities in risk  
33 572 factors for non communicable diseases in low-income and middle-income countries:  
34 573 results from the World Health Survey. *BMC public Health* 2012; **12**: 912.
- 35  
36 574 35 Manne-Goehler J, Atun R, Stokes A, *et al.* Diabetes diagnosis and care in sub-  
37 575 Saharan Africa: pooled analysis of individual data from 12 countries. *The lancet*  
38 576 *Diabetes & endocrinology* 2016; **4**: 903–12.
- 39  
40  
41 577 36 Field AE, Coakley EH, Must A, *et al.* Impact of overweight on the risk of  
42 578 developing common chronic diseases during a 10-year period. *Archives of internal*  
43 579 *medicine* 2001; **161**: 1581–6.
- 44  
45 580 37 Wang HH, Wang JJ, Wong SY, *et al.* Epidemiology of multimorbidity in China  
46 581 and implications for the healthcare system: cross-sectional survey among 162,464  
47 582 community household residents in southern China. *BMC medicine* 2014; **12**: 188.
- 48  
49  
50 583 38 Mondor L, Maxwell CJ, Hogan DB, *et al.* Multimorbidity and healthcare  
51 584 utilization among home care clients with dementia in Ontario, Canada: a  
52 585 retrospective analysis of a population-based cohort. *PLoS medicine* 2017; **14**:  
53 586 e1002249.
- 54  
55 587 39 Deonisia A. Kemenkes akan memperkuat fungsi preventif dan promotif melalui  
56 588 akreditasi Puskesmas. Kompas.id. 2019; published online Oct 28.  
57 589 <https://kompas.id/baca/utama/2019/10/28/kemenkes-akan-memperkuat-fungsi->  
58 590 [preventif-dan-promotif-melalui-akreditasi-puskesmas/](https://kompas.id/baca/utama/2019/10/28/kemenkes-akan-memperkuat-fungsi-) (accessed Sept 10, 2020).
- 59  
60

- 1  
2  
3 591 40Hoffmann T, Jansen J, Glasziou P. The importance and challenges of shared  
4 592 decision making in older people with multimorbidity. *PLoS medicine* 2018; **15**:  
5 593 e1002530.
- 6  
7  
8 594 41 World Health Organization. Preliminary results: Rapid assessment of service  
9 595 delivery for NCDs during the COVID-19 pandemic. World Health Organization,  
10 596 2020 [https://www.who.int/publications/m/item/rapid-assessment-of-service-](https://www.who.int/publications/m/item/rapid-assessment-of-service-delivery-for-ncds-during-the-covid-19-pandemic)  
11 597 [delivery-for-ncds-during-the-covid-19-pandemic](https://www.who.int/publications/m/item/rapid-assessment-of-service-delivery-for-ncds-during-the-covid-19-pandemic) (accessed Sept 10, 2020).
- 12  
13 598 42 World Health Organization. Multimorbidity: Technical Series on Safer Primary  
14 599 Care. Geneva, 2016.
- 15  
16 600 43 Kernick D, Chew-Graham CA, O’Flynn N. Clinical assessment and management  
17 601 of multimorbidity: NICE guideline. *Br J Gen Pract* 2017; **67**: 235–236.
- 18  
19 602 44 Chandraratne NK, Pathirathna K, Harrison C, Siriwardena AN. A comparison of  
20 603 policies and guidelines related to multimorbidity in the UK, Australia and Sri Lanka.  
21 604 *Australian journal of general practice* 2018; **47**: 15–9.
- 22  
23 605 45 Wang X, Sun X, Birch S, *et al.* People-centred integrated care in urban China. *Bull*  
24 606 *World Health Organ* 2018; **96**: 843–52.
- 25  
26 607 46 Satibi S, Andayani TM, Endarti D, Suwantara IPT, Wintariani NP, Agustini NPD.  
27 608 Comparison of Real Cost Versus the Indonesian Case Base Groups (INA-CBGs)  
28 609 Tariff Rates Among Patients of High-Incidence Cancers Under the National Health  
29 610 Insurance Scheme. *Asian Pacific journal of cancer prevention: APJCP* 2019; **20**:  
30 611 117.
- 31  
32 612 47 Schröders J, Wall S, Hakimi M, *et al.* How is Indonesia coping with its epidemic of  
33 613 chronic noncommunicable diseases? A systematic review with meta-analysis. *PloS*  
34 614 *one* 2017; **12**.
- 35  
36 615 48 Vellakkal S, Subramanian S, Millett C, Basu S, Stuckler D, Ebrahim S.  
37 616 Socioeconomic inequalities in non-communicable diseases prevalence in India:  
38 617 disparities between self-reported diagnoses and standardized measures. *PloS one*  
39 618 2013; **8**: e68219.
- 40  
41 619 49 D’Hoore W, Bouckaert A, Tilquin C. Practical considerations on the use of the  
42 620 Charlson comorbidity index with administrative data bases. *Journal of clinical*  
43 621 *epidemiology* 1996; **49**: 1429–33.

44  
45  
46  
47  
48  
49 622  
50  
51  
52  
53  
54  
55  
56  
57  
58  
59  
60

623 **Figure captions**624 **Figure 1. Prevalence of multimorbidity by age group and per capita household**  
625 **expenditure**

626

627

628

629

630

631

632

a) respondents who reported that they had 2 or more chronic conditions related to non-communicable diseases (NCDs). b) Pooled sample of Wave 4 and Wave 5. Q1-Q5 refer to household expenditure quintiles, where Q1 is the lowest and Q5 the highest household expenditure quintile.

**Tables****Table 1. Sample characteristics and factors associated with multimorbidity**

| Characteristics                  | 2007         |                           | 2014         |                           | Factors associated with multimorbidity |         |
|----------------------------------|--------------|---------------------------|--------------|---------------------------|----------------------------------------|---------|
|                                  | Total n (%)  | Multimorbidity % (95% CI) | Total n (%)  | Multimorbidity % (95% CI) | aOR (95% CI)                           | p value |
| Overall                          | 3678 (100%)  | 21.0 (19.6–22.6)          | 3678 (100%)  | 22.0 (20.6–23.6)          |                                        |         |
| Sex                              |              |                           |              |                           |                                        |         |
| Male                             | 1664 (46.1%) | 14.1 (12.3–16.1)          | 1663 (46.0%) | 19.4 (17.3–21.6)          | 1                                      |         |
| Female                           | 2014 (53.9%) | 26.9 (24.8–29.2)          | 2015 (54.0%) | 24.3 (22.3–26.4)          | 1.74 (1.46–2.08)                       | <0.0001 |
| Age                              |              |                           |              |                           |                                        |         |
| 50 – 60 years                    | 2210 (59.8%) | 19.9 (18.1–21.8)          | 966 (25.6%)  | 23.5 (20.7–26.7)          | 1                                      |         |
| 61 – 70 years                    | 1069 (29.9%) | 21.9 (19.2–24.8)          | 1562 (42.9%) | 21.6 (19.4–23.9)          | 1.10 (0.93–1.31)                       | 0.257   |
| 71+ years                        | 399 (10.3%)  | 25.2 (20.6–30.4)          | 1150 (31.4%) | 21.4 (18.8–24.2)          | 1.09 (0.87–1.38)                       | 0.444   |
| Marital status                   |              |                           |              |                           |                                        |         |
| Not currently married            | 927 (25.6%)  | 26.1 (23.0–29.4)          | 1338 (36.3%) | 23.3 (20.9–25.9)          | 1                                      |         |
| Currently married                | 2751 (74.4%) | 19.3 (17.7–21.1)          | 2340 (63.7%) | 21.3 (19.5–23.2)          | 1.03 (0.86–1.24)                       | 0.742   |
| Educational level                |              |                           |              |                           |                                        |         |
| No education                     | 2049 (58.7%) | 20.4 (18.5–22.5)          | 2098 (60.6%) | 18.0 (16.2–19.8)          | 1                                      |         |
| Primary                          | 903 (24.8%)  | 19.7 (17.0–22.7)          | 862 (23.0%)  | 24.0 (20.9–27.3)          | 1.19 (0.98–1.44)                       | 0.081   |
| Junior high school               | 273 (6.4%)   | 25.9 (20.5–32.3)          | 271 (6.3%)   | 36.3 (30.2–43.0)          | 1.50 (1.12–2.02)                       | 0.007   |
| Senior high school               | 324 (7.2%)   | 20.5 (15.8–25.9)          | 307 (7.0%)   | 29.5 (24.1–35.5)          | 0.96 (0.71–1.29)                       | 0.778   |
| Tertiary                         | 129 (2.9%)   | 34.4 (25.2–44.8)          | 140 (3.1%)   | 41.2 (31.6–51.6)          | 1.54 (1.01–2.34)                       | 0.043   |
| Ethnicity                        |              |                           |              |                           |                                        |         |
| Javanese                         | 1684 (51.8%) | 19.4 (17.4–21.5)          | 1781 (55.8%) | 19.7 (17.8–21.8)          | 1                                      |         |
| Sundanese                        | 424 (15.9%)  | 29.1 (24.8–33.9)          | 438 (16.3%)  | 27.3 (23.1–31.8)          | 1.38 (1.08–1.77)                       | 0.010   |
| Others                           | 1570 (32.3%) | 19.6 (17.4–22.0)          | 1459 (27.9%) | 23.6 (21.2–26.2)          | 1.10 (0.90–1.33)                       | 0.355   |
| Insurance coverage               |              |                           |              |                           |                                        |         |
| No                               | 2652 (74.5%) | 20.3 (18.6–22.1)          | 1950 (57.2%) | 18.7 (16.9–20.7)          | 1                                      |         |
| Yes                              | 1026 (25.5%) | 23.2 (20.4–26.4)          | 1720 (42.8%) | 26.4 (24.2–28.9)          | 1.18 (1.01–1.39)                       | 0.035   |
| Type of work                     |              |                           |              |                           |                                        |         |
| Unemployed                       | 951 (24.7%)  | 31.4 (28.1–34.9)          | 1483 (38.9%) | 29.9 (27.4–32.6)          | 1                                      |         |
| Casual                           | 674 (19.1%)  | 16.9 (13.9–20.4)          | 562 (14.1%)  | 13.8 (10.7–17.6)          | 0.47 (0.37–0.60)                       | <0.0001 |
| Self-employed                    | 1630 (45.2%) | 16.8 (14.9–18.9)          | 1464 (40.1%) | 17.4 (15.4–19.7)          | 0.61 (0.51–0.73)                       | <0.0001 |
| Government/private               | 423 (10.9%)  | 22.2 (18.0–27.1)          | 269 (7.0%)   | 21.0 (15.8–27.4)          | 0.60 (0.45–0.79)                       | <0.0001 |
| Per capita Household expenditure |              |                           |              |                           |                                        |         |
| Q1 (the lowest)                  | 728 (22.9%)  | 15.8 (13.0–18.9)          | 813 (25.2%)  | 13.5 (11.1–16.2)          | 1                                      |         |
| Q2                               | 785 (22.4%)  | 17.9 (15.1–21.2)          | 746 (21.4%)  | 18.9 (15.9–22.3)          | 1.28 (1.01–1.62)                       | 0.040   |
| Q3                               | 743 (20.1%)  | 20.5 (17.4–24.0)          | 757 (20.4%)  | 22.1 (18.9–25.7)          | 1.37 (1.08–1.74)                       | 0.009   |
| Q4                               | 744 (18.4%)  | 23.6 (20.3–27.3)          | 681 (17.2%)  | 25.3 (21.9–29.0)          | 1.84 (1.44–2.33)                       | <0.0001 |
| Q5 (the highest)                 | 678 (16.1%)  | 30.4 (26.5–34.7)          | 681 (15.8%)  | 36.2 (32.2–40.5)          | 2.22 (1.72–2.86)                       | <0.0001 |
| Residency                        |              |                           |              |                           |                                        |         |
| Rural                            | 1958 (63.4%) | 18.1 (16.3–20.1)          | 1682 (52.8%) | 16.9 (15.1–19.0)          | 1                                      |         |
| Urban                            | 1720 (36.6%) | 26.1 (23.8–28.6)          | 1996 (47.1%) | 27.7 (25.5–30.0)          | 1.41 (1.19–1.67)                       | <0.0001 |
| Region                           |              |                           |              |                           |                                        |         |
| Java-Bali                        | 2413 (77.5%) | 21.6 (19.9–23.5)          | 2417 (77.6%) | 21.1 (19.3–22.9)          | 1                                      |         |
| Sumatra                          | 691 (14.5%)  | 19.6 (16.7–22.8)          | 690 (14.5%)  | 26.6 (23.3–30.2)          | 1.06 (0.85–1.33)                       | 0.602   |
| Nusa Tenggara                    | 239 (2.4%)   | 14.5 (10.6–19.5)          | 239 (2.4%)   | 14.5 (10.5–19.6)          | 0.59 (0.40–0.87)                       | 0.008   |
| Kalimantan                       | 168 (1.8%)   | 17.9 (12.7–24.5)          | 168 (1.7%)   | 34.2 (27.4–41.7)          | 1.35 (0.92–1.98)                       | 0.129   |
| Sulawesi                         | 167 (3.8%)   | 19.6 (14.1–26.6)          | 164 (3.7%)   | 23.7 (17.6–31.0)          | 0.89 (0.59–1.34)                       | 0.569   |

a) Values are unweighted counts and weighted percentages unless otherwise indicated

b) We defined multimorbidity if the respondents reported that they had 2 or more chronic conditions related to NCDs. Chronic diseases included: hypertension, diabetes, asthma, heart attack/coronary heart diseases, liver disease, stroke, cancer, arthritis/rheumatism, hypercholesterolemia, and mental illness.

c) Adjusted odds ratio (aOR) was estimated using multilevel logistic regression model of 2007 and 2014 IFLS  
NCD: noncommunicable disease

633 **Table 2. Descriptive summary of health service use-financial burden and**  
 634 **productivity outcomes by the number of NCDs (2014 IFLS)**  
 635

|                                                      | No NCD            | 1 NCD             | 2 NCDs            | +3 NCDs           |
|------------------------------------------------------|-------------------|-------------------|-------------------|-------------------|
|                                                      | Mean (SD)         | Mean (SD)         | Mean (SD)         | Mean (SD)         |
| Overall (n, %)                                       | 1052 (100%)       | 1751 (100%)       | 627 (100%)        | 248 (100%)        |
| <b>Health service use</b>                            |                   |                   |                   |                   |
| <i>Outpatient services</i> <sup>a)</sup>             |                   |                   |                   |                   |
| Any visit (%; 95% CI)                                | 15.5% (13.3–17.9) | 21.7% (19.5–23.9) | 35.7% (31.7–40.0) | 55.9% (49.0–62.6) |
| Number of visits (mean, SD)                          | 0.24 ± 0.72       | 0.41 ± 1.1        | 0.78 ± 1.6        | 1.4 ± 2.1         |
| <i>Inpatient services</i> <sup>b)</sup>              |                   |                   |                   |                   |
| Any visit (%; 95% CI)                                | 3.3% (2.3–4.8)    | 4.6% (3.5–6.0)    | 8.3% (6.1–11.0)   | 20.8% (15.7–27.0) |
| Number of visits (mean, SD)                          | 0.04 ± 0.30       | 0.06 ± 0.31       | 0.14 ± 0.65       | 0.35 ± 0.96       |
| <b>Financial burden</b>                              |                   |                   |                   |                   |
| OOPE for outpatient care (mean, SD) <sup>a,c)</sup>  | \$17 ± 47         | \$17 ± 58         | \$15 ± 40         | \$60 ± 321        |
| OOPE for inpatient care (mean, SD) <sup>b,c)</sup>   | \$566 ± 1,880     | \$527 ± 2,115     | \$792 ± 1,706     | \$762 ± 1,421     |
| Annual Total OOPE (mean, SD)                         | \$295 ± 977       | \$292 ± 1,239     | \$336 ± 950       | \$968 ± 4,313     |
| <i>Catastrophic health expenditure</i> (%; 95% CI)   |                   |                   |                   |                   |
| >10% of total household expenditure                  | 5.0% (3.7–6.6)    | 6.9% (5.6–8.5)    | 10.3% (7.9–13.4)  | 12.5% (8.7–17.7)  |
| >25% of total household expenditure                  | 1.5% (0.6–2.5)    | 1.5% (0.9–2.3)    | 2.8% (1.6–4.8)    | 2.8% (1.3–6.3)    |
| >40% of total non-food expenditure                   | 1.8% (1.1–2.8)    | 2.7% (1.9–3.6)    | 4.0% (2.6–6.2)    | 3.6% (1.8–6.8)    |
| <b>Productivity loss</b>                             |                   |                   |                   |                   |
| <i>Labour participation</i> (%; 95% CI)              |                   |                   |                   |                   |
| 50-60 years <sup>d)</sup>                            | 84.3% (79.8–88.0) | 74.3% (69.3–78.8) | 72.3% (64.3–79.1) | 49.8% (36.7–62.9) |
| 61-70 years <sup>d)</sup>                            | 78.3% (74.0–82.1) | 65.2% (61.1–69.1) | 54.3% (47.1–61.3) | 42.8% (32.6–53.8) |
| 71+ years <sup>d)</sup>                              | 51.4% (44.7–58.1) | 45.0% (40.5–49.5) | 28.4% (21.6–36.3) | 17.3% (8.1–33.4)  |
| Number of days of primary activity missed (mean, SD) | 2.7 ± 6.0         | 3.6 ± 6.8         | 6.5 ± 9.8         | 10.1 ± 12.1       |
| Number of days lying in bed (mean, SD)               | 0.80 ± 3.4        | 0.99 ± 3.6        | 1.9 ± 6.0         | 2.4 ± 6.3         |

a) in the last four weeks

b) in the last 12 months

c) Out-of-pocket expenditure (OOPE) were only asked to those who utilised outpatient and/or inpatient services.

d) The percentages were calculated based on the total number of respondents by aged groups. Total respondents aged 50-60 years, 61-70 years and 71+ years are 966, 1592, and 1150 respondents.

OOPE medical expenses were converted to 2014 International Dollars (INT\$).

Bootstrapping with 400 times replications was performed to estimate the standard error and 95% CI.

636

637 **Table 3. The effect of multimorbidity on health service use**

| Variables                                  | Health service use      |              |                                |              |                         |              |                                |         |
|--------------------------------------------|-------------------------|--------------|--------------------------------|--------------|-------------------------|--------------|--------------------------------|---------|
|                                            | Outpatient              |              |                                |              | Inpatient               |              |                                |         |
|                                            | Any visit <sup>a)</sup> |              | Number of visits <sup>b)</sup> |              | Any visit <sup>a)</sup> |              | Number of visits <sup>b)</sup> |         |
| aOR (95% CI)                               | P values                | IRR (95% CI) | p values                       | aOR (95% CI) | p values                | IRR (95% CI) | p values                       |         |
| Number of NCDs (ref. no NCD)               |                         |              |                                |              |                         |              |                                |         |
| Single NCD                                 | 1.35 (1.15–1.58)        | <0.0001      | 1.45 (1.24–1.69)               | <0.0001      | 1.07 (0.78–1.48)        | 0.671        | 1.06 (0.75–1.50)               | 0.755   |
| Two NCDs                                   | 2.43 (2.00–2.95)        | <0.0001      | 2.45 (2.04–2.93)               | <0.0001      | 1.78 (1.23–2.57)        | 0.002        | 2.07 (1.39–3.08)               | <0.0001 |
| Three or more NCDs                         | 4.66 (3.55–6.11)        | <0.0001      | 4.25 (3.33–5.42)               | <0.0001      | 3.69 (2.35–5.79)        | <0.0001      | 3.68 (2.21–6.12)               | <0.0001 |
| Period (ref. 2007)                         |                         |              |                                |              |                         |              |                                |         |
| 2014                                       | 1.40 (1.22–1.61)        | <0.0001      | 1.46 (1.29–1.65)               | <0.0001      | 1.79 (1.36–2.36)        | <0.0001      | 2.20 (1.63–2.98)               | <0.0001 |
| Sex (ref. Male)                            |                         |              |                                |              |                         |              |                                |         |
| Female                                     | 1.26 (1.08–1.47)        | 0.003        | 1.20 (1.04–1.39)               | 0.013        | 0.93 (0.70–1.24)        | 0.626        | 0.85 (0.62–1.16)               | 0.300   |
| Age (ref. 50 – 60 years)                   |                         |              |                                |              |                         |              |                                |         |
| 61 – 70 years                              | 1.01 (0.86–1.18)        | 0.905        | 1.00 (0.87–1.16)               | 0.969        | 1.07 (0.78–1.45)        | 0.677        | 1.17 (0.84–1.65)               | 0.351   |
| 71+ years                                  | 1.10 (0.90–1.34)        | 0.351        | 1.06 (0.88–1.27)               | 0.567        | 1.49 (1.03–2.15)        | 0.034        | 1.66 (1.11–2.49)               | 0.014   |
| Marital status (ref. Not married)          |                         |              |                                |              |                         |              |                                |         |
| Currently married                          | 1.14 (0.97–1.34)        | 0.105        | 1.15 (0.99–1.34)               | 0.069        | 1.04 (0.77–1.40)        | 0.815        | 0.98 (0.71–1.37)               | 0.914   |
| Educational level (ref. No education)      |                         |              |                                |              |                         |              |                                |         |
| Primary                                    | 1.06 (0.90–1.25)        | 0.496        | 0.96 (0.82–1.13)               | 0.629        | 1.09 (0.80–1.50)        | 0.578        | 0.97 (0.69–1.38)               | 0.882   |
| Junior high school                         | 1.04 (0.80–1.35)        | 0.786        | 1.00 (0.78–1.28)               | 0.993        | 1.23 (0.78–1.95)        | 9,400.36     | 1.48 (0.90–2.42)               | 0.120   |
| Senior high school                         | 1.05 (0.81–1.36)        | 0.706        | 0.91 (0.71–1.17)               | 0.473        | 0.91 (0.57–1.46)        | 0.699        | 0.82 (0.49–1.37)               | 0.448   |
| Tertiary                                   | 1.29 (0.90–1.84)        | 0.167        | 0.93 (0.66–1.32)               | 0.697        | 0.98 (0.53–1.80)        | 0.937        | 0.85 (0.42–1.69)               | 0.640   |
| Ethnicity (ref. Javanese)                  |                         |              |                                |              |                         |              |                                |         |
| Sundanese                                  | 0.92 (0.74–1.14)        | 0.464        | 0.95 (0.77–1.16)               | 0.617        | 0.90 (0.61–1.34)        | 0.609        | 1.14 (0.75–1.76)               | 0.536   |
| Others                                     | 1.06 (0.89–1.25)        | 0.525        | 0.99 (0.84–1.16)               | 0.877        | 0.90 (0.65–1.23)        | 0.495        | 1.08 (0.76–1.52)               | 0.676   |
| Insurance coverage (ref. No)               |                         |              |                                |              |                         |              |                                |         |
| Yes                                        | 1.48 (1.28–1.70)        | <0.0001      | 1.51 (1.32–1.72)               | <0.0001      | 1.90 (1.45–2.50)        | <0.0001      | 1.65 (1.23–2.21)               | 0.001   |
| Type of work (ref. Unemployed)             |                         |              |                                |              |                         |              |                                |         |
| Casual                                     | 0.76 (0.62–0.95)        | 0.014        | 0.69 (0.57–0.85)               | <0.0001      | 0.49 (0.31–0.78)        | 0.003        | 0.44 (0.27–0.73)               | 0.001   |
| Self-employed                              | 0.85 (0.73–1.00)        | 0.056        | 0.82 (0.70–0.95)               | 0.008        | 0.60 (0.44–0.82)        | 0.001        | 0.60 (0.43–0.83)               | 0.002   |
| Government/private                         | 0.75 (0.58–0.96)        | 0.025        | 0.72 (0.57–0.92)               | 0.008        | 0.63 (0.39–1.04)        | 0.071        | 0.77 (0.46–1.31)               | 0.335   |
| Per capita household expenditure (ref. Q1) |                         |              |                                |              |                         |              |                                |         |
| Q2                                         | 1.50 (1.21–1.86)        | <0.0001      | 1.50 (1.23–1.84)               | <0.0001      | 1.25 (0.81–1.92)        | 0.307        | 1.07 (0.67–1.70)               | 0.777   |
| Q3                                         | 1.76 (1.42–2.18)        | <0.0001      | 1.74 (1.42–2.13)               | <0.0001      | 1.64 (1.08–2.49)        | 0.020        | 1.71 (1.10–2.66)               | 0.018   |
| Q4                                         | 1.73 (1.38–2.15)        | <0.0001      | 1.80 (1.46–2.21)               | <0.0001      | 1.42 (0.91–2.20)        | 0.121        | 1.36 (0.86–2.18)               | 0.192   |
| Q5                                         | 1.90 (1.51–2.40)        | <0.0001      | 2.09 (1.68–2.59)               | <0.0001      | 2.48 (1.60–3.85)        | <0.0001      | 2.52 (1.59–4.00)               | <0.0001 |
| Residency (ref. Rural)                     |                         |              |                                |              |                         |              |                                |         |
| Urban                                      | 0.92 (0.80–1.07)        | 0.283        | 0.95 (0.83–1.10)               | 0.500        | 0.96 (0.72–1.26)        | 0.744        | 1.05 (0.78–1.42)               | 0.726   |
| Region (ref. Java-Bali)                    |                         |              |                                |              |                         |              |                                |         |
| Sumatra                                    | 0.83 (0.68–1.00)        | 0.052        | 0.98 (0.81–1.17)               | 0.798        | 1.23 (0.87–1.74)        | 0.236        | 1.25 (0.86–1.82)               | 0.250   |
| Nusa Tenggara                              | 0.64 (0.46–0.89)        | 0.007        | 0.60 (0.43–0.82)               | 0.002        | 1.25 (0.71–2.18)        | 0.437        | 1.11 (0.60–2.03)               | 0.745   |
| Kalimantan                                 | 1.03 (0.74–1.43)        | 0.873        | 1.21 (0.89–1.65)               | 0.228        | 1.09 (0.58–2.05)        | 0.799        | 0.94 (0.47–1.89)               | 0.865   |
| Sulawesi                                   | 0.64 (0.45–0.93)        | 0.019        | 0.63 (0.44–0.90)               | 0.011        | 0.63 (0.30–1.35)        | 0.235        | 0.63 (0.29–1.38)               | 0.249   |

<sup>a)</sup> Multilevel logistic regression model

<sup>b)</sup> Multilevel negative binomial regression model

aOR: adjusted odds ratio, IRR: Incidence rate ratio, NCD: noncommunicable disease

638

639 **Table 4. The effect of multimorbidity on catastrophic expenditure**

| Variables                                  | Catastrophic health expenditure                  |          |                                                  |          |                                           |          |
|--------------------------------------------|--------------------------------------------------|----------|--------------------------------------------------|----------|-------------------------------------------|----------|
|                                            | 10% of total household expenditure <sup>a)</sup> |          | 25% of total household expenditure <sup>a)</sup> |          | 40% of non-food expenditure <sup>a)</sup> |          |
|                                            | aOR (95% CI)                                     | p values | aOR (95% CI)                                     | p values | aOR (95% CI)                              | p values |
| Number of NCDs (ref. no NCD)               |                                                  |          |                                                  |          |                                           |          |
| Single NCD                                 | 1.11 (0.76–1.62)                                 | 0.591    | 0.81 (0.49–1.34)                                 | 0.417    | 0.86 (0.52–1.43)                          | 0.561    |
| Two NCDs                                   | 1.58 (1.06–2.35)                                 | 0.026    | 1.39 (0.79–2.45)                                 | 0.250    | 1.27 (0.69–2.35)                          | 0.437    |
| Three or more NCDs                         | 1.69 (1.02–2.81)                                 | 0.042    | 0.96 (0.40–2.34)                                 | 0.937    | 0.72 (0.27–1.89)                          | 0.503    |
| Period (ref. 2007)                         |                                                  |          |                                                  |          |                                           |          |
| 2014                                       | 1.42 (1.12–1.80)                                 | 0.003    | 1.27 (0.83–1.95)                                 | 0.271    | 1.18 (0.77–1.80)                          | 0.442    |
| Sex (ref. Male)                            |                                                  |          |                                                  |          |                                           |          |
| Female                                     | 0.89 (0.64–1.23)                                 | 0.480    | 0.90 (0.57–1.42)                                 | 0.645    | 0.83 (0.52–1.33)                          | 0.432    |
| Age (ref. 50 – 60 years)                   |                                                  |          |                                                  |          |                                           |          |
| 61 – 70 years                              | 1.15 (0.79–1.69)                                 | 0.461    | 1.46 (0.90–2.36)                                 | 0.125    | 1.43 (0.85–2.38)                          | 0.175    |
| 71+ years                                  | 1.13 (0.66–1.92)                                 | 0.663    | 1.01 (0.51–2.01)                                 | 0.975    | 1.24 (0.60–2.55)                          | 0.563    |
| Marital status (ref. Not married)          |                                                  |          |                                                  |          |                                           |          |
| Currently married                          | 1.59 (1.22 – 2.09)                               | 0.001    | 1.68 (0.98–2.87)                                 | 0.060    | 1.83 (1.01–3.33)                          | 0.047    |
| Educational level (ref. No education)      |                                                  |          |                                                  |          |                                           |          |
| Primary                                    | 0.96 (0.67–1.38)                                 | 0.841    | 0.90 (0.52–1.55)                                 | 0.708    | 0.85 (0.48–1.52)                          | 0.589    |
| Junior high school                         | 0.97 (0.64–1.47)                                 | 0.902    | 1.21 (0.58–2.55)                                 | 0.610    | 0.60 (0.25–1.48)                          | 0.271    |
| Senior high school                         | 0.93 (0.61–1.42)                                 | 0.735    | 1.22 (0.59–2.52)                                 | 0.595    | 0.81 (0.34–1.92)                          | 0.627    |
| Tertiary                                   | 0.45 (0.22–0.90)                                 | 0.023    | 0.11 (0.01–0.94)                                 | 0.043    | 0.12 (0.02–0.84)                          | 0.032    |
| Ethnicity (ref. Javanese)                  |                                                  |          |                                                  |          |                                           |          |
| Sundanese                                  | 0.87 (0.62–1.23)                                 | 0.433    | 1.80 (0.98–3.33)                                 | 0.060    | 1.14 (0.52–2.48)                          | 0.748    |
| Others                                     | 0.76 (0.56–1.02)                                 | 0.065    | 1.01 (0.58–1.78)                                 | 0.959    | 0.56 (0.28–1.09)                          | 0.088    |
| Insurance coverage (ref. No)               |                                                  |          |                                                  |          |                                           |          |
| Yes                                        | 0.89 (0.67–1.20)                                 | 0.451    | 0.83 (0.53–1.31)                                 | 0.425    | 0.80 (0.49–1.32)                          | 0.390    |
| Type of work (ref. Unemployed)             |                                                  |          |                                                  |          |                                           |          |
| Casual                                     | 0.59 (0.33–1.07)                                 | 0.082    | 0.58 (0.29–1.17)                                 | 0.128    | 0.41 (0.20–0.84)                          | 0.015    |
| Self-employed                              | 0.60 (0.36–1.01)                                 | 0.056    | 0.58 (0.35–0.96)                                 | 0.033    | 0.45 (0.27–0.76)                          | 0.003    |
| Government/private                         | 0.58 (0.34–1.02)                                 | 0.058    | 0.78 (0.35–1.70)                                 | 0.527    | 0.39 (0.16–0.95)                          | 0.038    |
| Per capita household expenditure (ref. Q1) |                                                  |          |                                                  |          |                                           |          |
| Q2                                         | 1.04 (0.071– 1.52)                               | 0.834    | 1.60 (0.71–3.57)                                 | 0.257    | 1.34 (0.62–2.90)                          | 0.459    |
| Q3                                         | 1.37 (0.97–1.95)                                 | 0.076    | 1.71 (0.77–3.80)                                 | 0.188    | 1.19 (0.54–2.61)                          | 0.669    |
| Q4                                         | 1.98 (1.40–2.81)                                 | <0.0001  | 3.11 (1.43–6.76)                                 | 0.004    | 2.73 (1.23–6.03)                          | 0.013    |
| Q5                                         | 3.13 (2.28–4.31)                                 | <0.0001  | 5.91 (2.72–12.85)                                | <0.0001  | 8.45 (3.70–19.32)                         | <0.0001  |
| Residency (ref. Rural)                     |                                                  |          |                                                  |          |                                           |          |
| Urban                                      | 0.94 (0.61–1.45)                                 | 0.785    | 0.76 (0.46–1.24)                                 | 0.273    | 0.75 (0.43–1.31)                          | 0.309    |
| Region (ref. Java-Bali)                    |                                                  |          |                                                  |          |                                           |          |
| Sumatra                                    | 0.78 (0.56–1.09)                                 | 0.146    | 0.73 (0.38–1.38)                                 | 0.328    | 1.08 (0.52–2.24)                          | 0.846    |
| Nusa Tenggara                              | 0.64 (0.34 – 1.21)                               | 0.175    | 0.98 (0.32–2.99)                                 | 0.968    | 0.93 (0.22–3.83)                          | 0.917    |
| Kalimantan                                 | 0.78 (0.39–1.52)                                 | 0.460    | 0.64 (0.19–2.24)                                 | 0.488    | 0.64 (0.15–2.77)                          | 0.548    |
| Sulawesi                                   | 0.80 (0.43–1.48)                                 | 0.478    | 1.21 (0.41–3.57)                                 | 0.724    | 1.31 (0.33–5.17)                          | 0.701    |

<sup>a)</sup> Multilevel logistic regression model

aOR: adjusted odds ratio, NCD: noncommunicable disease



641 **Table 5. The effect of multimorbidity on productivity loss**

| Variables                                  | Productivity loss                  |          |                                            |          |                                  |          |
|--------------------------------------------|------------------------------------|----------|--------------------------------------------|----------|----------------------------------|----------|
|                                            | Labour participation <sup>a)</sup> |          | Days primary activity missed <sup>b)</sup> |          | Days stayed in bed <sup>b)</sup> |          |
|                                            | aOR (95% CI)                       | p values | IRR (95% CI)                               | p values | IRR (95% CI)                     | p values |
| Number of NCDs (ref. no NCD)               |                                    |          |                                            |          |                                  |          |
| Single NCD                                 | 0.65 (0.54–0.79)                   | <0.0001  | 1.25 (1.08–1.43)                           | 0.002    | 1.09 (0.84–1.43)                 | 0.509    |
| Two NCDs                                   | 0.45 (0.35–0.57)                   | <0.0001  | 1.90 (1.58–2.29)                           | <0.0001  | 1.87 (1.33–2.61)                 | <0.0001  |
| Three or more NCDs                         | 0.23 (0.16–0.33)                   | <0.0001  | 2.59 (1.97–3.41)                           | <0.0001  | 2.64 (1.60–4.36)                 | <0.0001  |
| Period (ref. 2007)                         |                                    |          |                                            |          |                                  |          |
| 2014                                       | 0.69 (0.59–0.81)                   | <0.0001  | 1.66 (1.46–1.88)                           | <0.0001  | 1.79 (1.40–2.29)                 | <0.0001  |
| Sex (ref. Male)                            |                                    |          |                                            |          |                                  |          |
| Female                                     | 0.21 (0.17–0.26)                   | <0.0001  | 0.99 (0.86–1.14)                           | 0.912    | 0.92 (0.70–1.21)                 | 0.567    |
| Age (ref. 50 – 60 years)                   |                                    |          |                                            |          |                                  |          |
| 61 – 70 years                              | 0.37 (0.31–0.45)                   | <0.0001  | 0.99 (0.86–1.14)                           | 0.859    | 1.07 (0.81–1.41)                 | 0.617    |
| 71+ years                                  | 0.10 (0.07–0.13)                   | <0.0001  | 1.20 (1.00–1.44)                           | 0.047    | 1.93 (1.37–2.72)                 | <0.0001  |
| Marital status (ref. Not married)          |                                    |          |                                            |          |                                  |          |
| Currently married                          | 1.51 (1.23–1.84)                   | <0.0001  | 1.13 (0.98–1.31)                           | 0.089    | 0.88 (0.67–1.17)                 | 0.395    |
| Educational level (ref. No education)      |                                    |          |                                            |          |                                  |          |
| Primary                                    | 0.89 (0.71–1.11)                   | 0.305    | 0.92 (0.79–1.07)                           | 0.263    | 1.00 (0.75–1.33)                 | 0.999    |
| Junior high school                         | 0.41 (0.29–0.57)                   | <0.0001  | 0.94 (0.74–1.20)                           | 0.631    | 0.87 (0.54–1.40)                 | 0.570    |
| Senior high school                         | 0.41 (0.29–0.58)                   | <0.0001  | 0.68 (0.53–0.87)                           | 0.002    | 0.81 (0.51–1.28)                 | 0.362    |
| Tertiary                                   | 0.51 (0.31–0.82)                   | 0.006    | 0.54 (0.38–0.78)                           | 0.001    | 0.37 (0.18–0.78)                 | 0.009    |
| Ethnicity (ref. Javanese)                  |                                    |          |                                            |          |                                  |          |
| Sundanese                                  | 0.50 (0.37–0.67)                   | <0.0001  | 1.35 (1.11–1.65)                           | 0.003    | 1.28 (0.89–1.85)                 | 0.179    |
| Others                                     | 0.77 (0.61–0.98)                   | 0.033    | 1.11 (0.95–1.30)                           | 0.188    | 1.12 (0.84–1.49)                 | 0.436    |
| Insurance coverage (ref. No)               |                                    |          |                                            |          |                                  |          |
| Yes                                        | 0.85 (0.72–1.01)                   | 0.071    | 1.08 (0.95–1.22)                           | 0.258    | 1.05 (0.82–1.34)                 | 0.704    |
| Type of work (ref. Unemployed)             |                                    |          |                                            |          |                                  |          |
| Casual                                     | N/A                                | N/A      | 0.62 (0.51–0.75)                           | <0.0001  | 0.32 (0.22–0.47)                 | <0.0001  |
| Self-employed                              | N/A                                | N/A      | 0.62 (0.53–0.71)                           | <0.0001  | 0.42 (0.32–0.56)                 | <0.0001  |
| Government/private                         | N/A                                | N/A      | 0.57 (0.45–0.72)                           | <0.0001  | 0.45 (0.28–0.73)                 | 0.001    |
| Per capita household expenditure (ref. Q1) |                                    |          |                                            |          |                                  |          |
| Q2                                         | 1.37 (1.08–1.75)                   | 0.011    | 1.03 (0.86–1.23)                           | 0.744    | 1.05 (0.74–1.49)                 | 0.769    |
| Q3                                         | 1.33 (1.03–1.71)                   | 0.028    | 1.15 (0.96–1.38)                           | 0.130    | 1.06 (0.75–1.50)                 | 0.737    |
| Q4                                         | 1.12 (0.87–1.46)                   | 0.379    | 1.05 (0.87–1.27)                           | 0.627    | 1.02 (0.71–1.46)                 | 0.914    |
| Q5                                         | 1.34 (1.01–1.77)                   | 0.043    | 1.29 (1.05–1.58)                           | 0.015    | 0.92 (0.63–1.35)                 | 0.668    |
| Residency (ref. Rural)                     |                                    |          |                                            |          |                                  |          |
| Urban                                      | 0.44 (0.35–0.54)                   | <0.0001  | 0.93 (0.81–1.07)                           | 0.296    | 0.70 (0.54–0.89)                 | 0.004    |
| Region (ref. Java-Bali)                    |                                    |          |                                            |          |                                  |          |
| Sumatra                                    | 0.95 (0.73–1.25)                   | 0.735    | 1.13 (0.94–1.36)                           | 0.194    | 1.01 (0.73–1.40)                 | 0.956    |
| Nusa Tenggara                              | 0.74 (0.48–1.14)                   | 0.177    | 0.90 (0.68–1.20)                           | 0.472    | 1.14 (0.67–1.93)                 | 0.638    |
| Kalimantan                                 | 1.21 (0.75–1.94)                   | 0.440    | 0.90 (0.67–1.22)                           | 0.511    | 0.89 (0.51–1.57)                 | 0.688    |
| Sulawesi                                   | 0.39 (0.24–0.62)                   | <0.0001  | 0.99 (0.72–1.36)                           | 0.948    | 0.94 (0.53–1.69)                 | 0.845    |

a) Multilevel logistic regression model

b) Multilevel negative binomial regression model

aOR: adjusted odds ratio, IRR: incidence rate ratio, NCD: noncommunicable disease

642

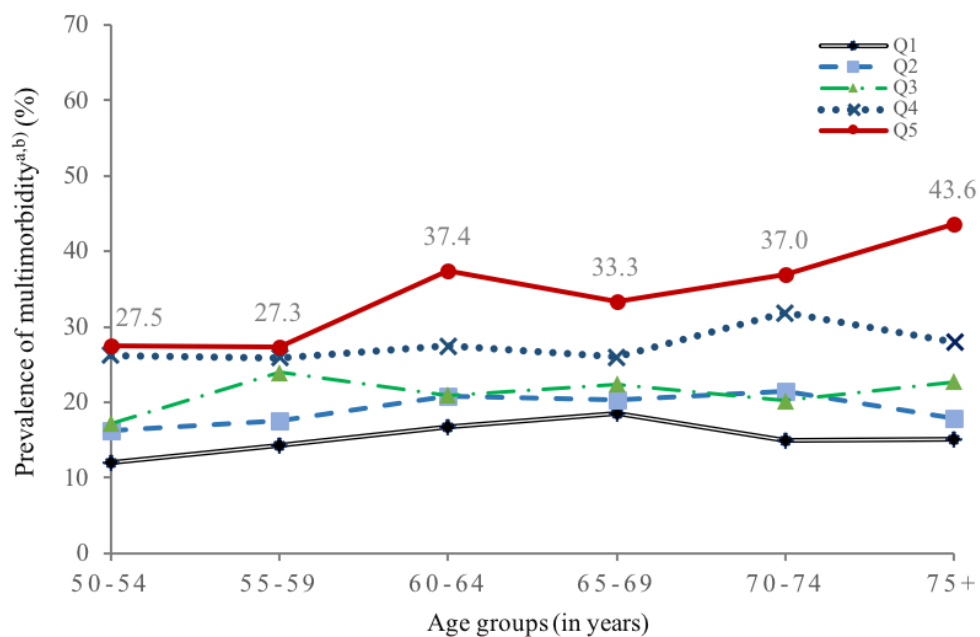

Figure 1. Prevalence of multimorbidity by age group and per capita household expenditure  
 a) respondents who reported that they had 2 or more chronic conditions related to non-communicable diseases (NCDs). b) Pooled sample of Wave 4 and Wave 5. Q1-Q5 refer to household expenditure quintiles, where Q1 is the lowest and Q5 the highest household expenditure quintile.

137x91mm (150 x 150 DPI)



## SUPPLEMENTAL MATERIAL

Figure S1. Sample flowchart

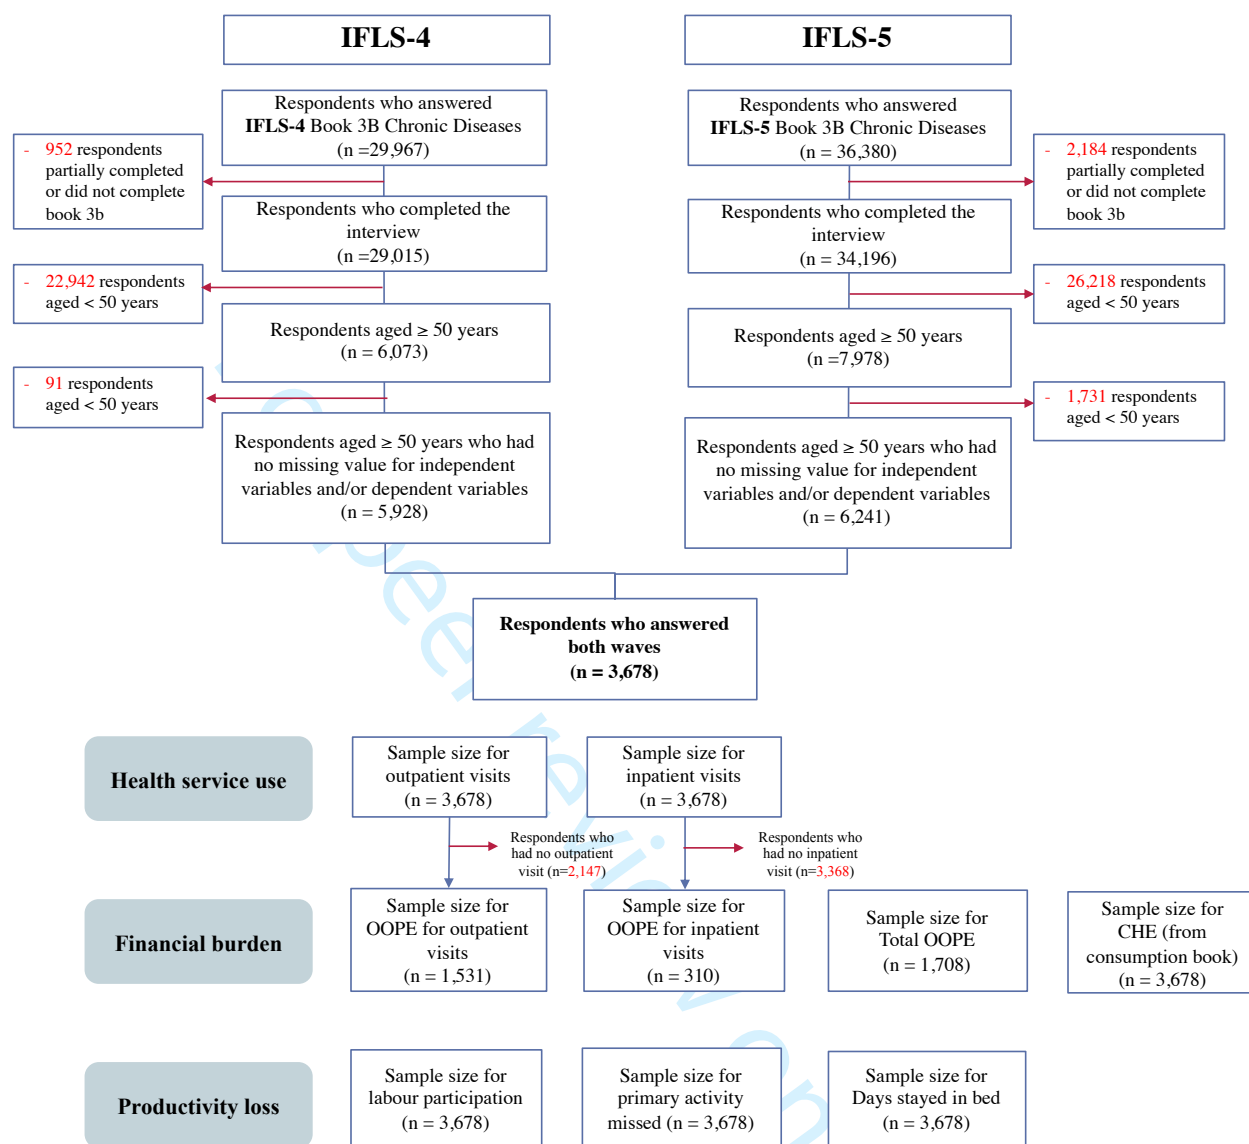

**Table S1. List of variables for 2007 & 2014 IFLS analysis**

| Variables                          | Type                | Measurement                                        | Source of measurement                                                                                                                                                                    |
|------------------------------------|---------------------|----------------------------------------------------|------------------------------------------------------------------------------------------------------------------------------------------------------------------------------------------|
| <b>Dependent variables:</b>        |                     |                                                    |                                                                                                                                                                                          |
| 1) Health service use              |                     |                                                    |                                                                                                                                                                                          |
| Outpatient care                    | Binary              | 0. No<br>1. Yes                                    | RJ00: In the last 4 weeks have you visited a public hospital- <i>puskesmas</i> -private hospital-clinic-health worker or doctor's practice or been visited by a health worker or doctor? |
|                                    | Numerical           | Number of days                                     | RJ02: How many times did you visit / been visited by [...] during the last 4 weeks?                                                                                                      |
| Inpatient care                     | Binary              | 0. No<br>1. Yes                                    | RN00: During the past 12 months have you ever received patient care at a hospital- <i>puskesmas</i> -clinic-or other?                                                                    |
|                                    | Numerical           | Number of days                                     | RN02: How many times have you received inpatient care at [...] during the past 12 months?                                                                                                |
| 2) Productivity loss               |                     |                                                    |                                                                                                                                                                                          |
| Labour participation               | Binary              | 0. No<br>1. Yes                                    | TK06a: Did you work/try to work/help to earn income for pay for at least 1 hour during the past week?                                                                                    |
|                                    | Numerical           | Number of days                                     |                                                                                                                                                                                          |
| Activity missed due to poor health | Numerical           | Number of days                                     | KK02a: During the last 4 weeks-how many days of your primary daily activities did you miss due to poor health?                                                                           |
| Stayed in bed                      | Numerical           | Number of days                                     | KK02b: In the last 4 weeks-how many days have you stayed in bed due to poor health?                                                                                                      |
| 3) Financial burden                |                     |                                                    |                                                                                                                                                                                          |
| OOPE of outpatient care            | Numerical           | International Dollars                              | RJ02b: How much did you pay out of pocket for outpatient care at [...] during the past 4 weeks?                                                                                          |
| OOPE of inpatient care             | Numerical           | International Dollars                              | RN02b: How much did you pay out of pocket for inpatient care at [...] during the past 12 months?                                                                                         |
| Annual Total OOPE                  | Numerical           | International Dollars                              | Annual total OOPE for outpatient and inpatient visits                                                                                                                                    |
| Catastrophic health expenditure    | Binary              | 0. No<br>1. Yes                                    | Book KS:<br>"How much money spent by all household members for medical costs during the past year?"                                                                                      |
| <b>Main independent variable</b>   |                     |                                                    |                                                                                                                                                                                          |
| Number of NCDs                     | Numerical           | Total number of chronic conditions related to NCDs | Book IIIB:<br>CD06a – CD06r: Have a doctor/paramedic/nurse/ midwife ever told you that you had [list of chronic diseases]                                                                |
|                                    | Categorical ordinal | 2. No<br>3. 1 NCD<br>4. 2 NCDs                     |                                                                                                                                                                                          |

| Variables                                                                                                                                                                                                                                                                                                                    | Type                | Measurement                                               | Source of measurement                                                                                                                                                                         |
|------------------------------------------------------------------------------------------------------------------------------------------------------------------------------------------------------------------------------------------------------------------------------------------------------------------------------|---------------------|-----------------------------------------------------------|-----------------------------------------------------------------------------------------------------------------------------------------------------------------------------------------------|
| Multimorbidity                                                                                                                                                                                                                                                                                                               | Binary              | 5. 3+ NCDs                                                | Book IIIB:<br>CD06a – CD06r: Have a doctor/paramedic/nurse/ midwife ever told you that you had [list of chronic diseases]                                                                     |
|                                                                                                                                                                                                                                                                                                                              |                     | 0. No                                                     |                                                                                                                                                                                               |
|                                                                                                                                                                                                                                                                                                                              |                     | 1. Yes (had 2 or more chronic conditions related to NCDs) |                                                                                                                                                                                               |
| List of chronic diseases included in the main analysis:<br>Hypertension, diabetes, asthma, heart attack/coronary heart diseases, liver disease, stroke, cancer, arthritis/rheumatism, hypercholesterolemia, and depression/mental illness.                                                                                   |                     |                                                           |                                                                                                                                                                                               |
| List of chronic diseases in 2007 IFLS (Wave 4): Hypertension, diabetes, asthma, heart attack/coronary heart diseases, liver disease, stroke, cancer, arthritis/rheumatism, hypercholesterolemia, and depression/mental illness.                                                                                              |                     |                                                           |                                                                                                                                                                                               |
| List of chronic diseases in 2014 IFLS (Wave 5): Hypertension, diabetes, asthma, heart attack/coronary heart diseases, liver disease, stroke, cancer, arthritis/rheumatism, hypercholesterolemia, mental illness, prostate diseases, kidney diseases (excluding malignancy), digestive diseases, and memory-related diseases. |                     |                                                           |                                                                                                                                                                                               |
| <b>Covariates</b>                                                                                                                                                                                                                                                                                                            |                     |                                                           |                                                                                                                                                                                               |
| Age (in years)                                                                                                                                                                                                                                                                                                               | Categorical ordinal | 0. 40-49 years                                            | Book IIIA:<br>Age: How old are you?                                                                                                                                                           |
|                                                                                                                                                                                                                                                                                                                              |                     | 1. 50-59 years                                            |                                                                                                                                                                                               |
|                                                                                                                                                                                                                                                                                                                              |                     | 2. 60-69 years                                            |                                                                                                                                                                                               |
|                                                                                                                                                                                                                                                                                                                              |                     | 3. 70-79 years                                            |                                                                                                                                                                                               |
|                                                                                                                                                                                                                                                                                                                              |                     | 4. 80+                                                    |                                                                                                                                                                                               |
| Sex                                                                                                                                                                                                                                                                                                                          | Binary              | 0. Male                                                   | Book IIIA:<br>Sex: (identified by interviewers)                                                                                                                                               |
|                                                                                                                                                                                                                                                                                                                              |                     | 1. Female                                                 |                                                                                                                                                                                               |
| Ethnicity                                                                                                                                                                                                                                                                                                                    | Categorical nominal | 0. Javanese                                               |                                                                                                                                                                                               |
|                                                                                                                                                                                                                                                                                                                              |                     | 1. Sundanese                                              |                                                                                                                                                                                               |
|                                                                                                                                                                                                                                                                                                                              |                     | 2. Others                                                 |                                                                                                                                                                                               |
| Marital status                                                                                                                                                                                                                                                                                                               | Binary              | 0. Unmarried/Divorce                                      | Book IIIA<br>HR00b: Are you currently married?                                                                                                                                                |
|                                                                                                                                                                                                                                                                                                                              |                     | 1. Married or living together                             |                                                                                                                                                                                               |
| Education                                                                                                                                                                                                                                                                                                                    | Categorical ordinal | 0. None                                                   | Book IIIA:<br>DL06: What is the highest education level attended?<br>DL07: What is the highest grade completed at school.                                                                     |
|                                                                                                                                                                                                                                                                                                                              |                     | 1. Elementary school                                      |                                                                                                                                                                                               |
|                                                                                                                                                                                                                                                                                                                              |                     | 2. Junior high school                                     |                                                                                                                                                                                               |
|                                                                                                                                                                                                                                                                                                                              |                     | 3. High school                                            |                                                                                                                                                                                               |
|                                                                                                                                                                                                                                                                                                                              |                     | 4. Tertiary                                               |                                                                                                                                                                                               |
| Occupation                                                                                                                                                                                                                                                                                                                   | Categorical nominal | 0. None                                                   | Book IIIA:<br>TK06a: Did you work/try to work/help to earn income for pay for at least 1 hour during the past week?<br>TK15: Which category best describes the work you did in your last job? |
|                                                                                                                                                                                                                                                                                                                              |                     | 1. Casual worker                                          |                                                                                                                                                                                               |
|                                                                                                                                                                                                                                                                                                                              |                     | 2. Self-employed                                          |                                                                                                                                                                                               |
|                                                                                                                                                                                                                                                                                                                              |                     | 3. Government/private worker                              |                                                                                                                                                                                               |
| Health insurance status                                                                                                                                                                                                                                                                                                      | Binary              | 0. Uninsured (Not covered by any insurance)               | Book IIIB:<br>AK01: Are you the policy holder/primary beneficiary of health benefits-health insurance?                                                                                        |
|                                                                                                                                                                                                                                                                                                                              |                     | 1. Insured                                                |                                                                                                                                                                                               |
| Per capita expenditure                                                                                                                                                                                                                                                                                                       | Categorical ordinal | 0. Q1 (lowest)                                            | Book KS                                                                                                                                                                                       |
|                                                                                                                                                                                                                                                                                                                              |                     | 1. Q2                                                     |                                                                                                                                                                                               |
|                                                                                                                                                                                                                                                                                                                              |                     | 2. Q3                                                     |                                                                                                                                                                                               |
|                                                                                                                                                                                                                                                                                                                              |                     | 3. Q4                                                     |                                                                                                                                                                                               |
|                                                                                                                                                                                                                                                                                                                              |                     | 4. Q5 (highest)                                           |                                                                                                                                                                                               |
| Residency                                                                                                                                                                                                                                                                                                                    | Binary              | 0. Rural                                                  | Book T-2:<br>SC06: (identified by interviewers)                                                                                                                                               |
|                                                                                                                                                                                                                                                                                                                              |                     | 1. Urban                                                  |                                                                                                                                                                                               |
| Region                                                                                                                                                                                                                                                                                                                       | Categorical nominal | 0. Java-Bali                                              | Book T-2:<br>SC01: province (identified by interviewers)                                                                                                                                      |
|                                                                                                                                                                                                                                                                                                                              |                     | 1. Sumatra                                                |                                                                                                                                                                                               |
|                                                                                                                                                                                                                                                                                                                              |                     | 2. Nusa Tenggara                                          |                                                                                                                                                                                               |
|                                                                                                                                                                                                                                                                                                                              |                     | 3. Kalimantan                                             |                                                                                                                                                                                               |
|                                                                                                                                                                                                                                                                                                                              |                     | 4. Sulawesi                                               |                                                                                                                                                                                               |

**Table S2. Sample characteristics by number of NCDs**

| Characteristics       | 2007 (n=3,678)        |                      |                           | 2014 (n=3,678)        |                      |                           |
|-----------------------|-----------------------|----------------------|---------------------------|-----------------------|----------------------|---------------------------|
|                       | Zero NCD<br>(n=1,272) | One NCD<br>(n=1,605) | Multimorbidity<br>(n=801) | Zero NCD<br>(n=1,052) | One NCD<br>(n=1,751) | Multimorbidity<br>(n=875) |
| Sex                   |                       |                      |                           |                       |                      |                           |
| Male                  | 44.2 (41.5–46.9)      | 41.7 (39.1–44.5)     | 14.1 (12.3–16.1)          | 34.7 (32.1–37.3)      | 45.9 (43.2–48.7)     | 19.3 (17.3–21.6)          |
| Female                | 28.9 (26.7–31.3)      | 44.2 (41.7–46.7)     | 26.9 (24.8–29.2)          | 24.6 (22.5–26.8)      | 51.1 (48.6–53.6)     | 24.3 (22.3–26.4)          |
| Age                   |                       |                      |                           |                       |                      |                           |
| 50 – 60 years         | 39.9 (37.55–42.2)     | 40.3 (38.0–42.6)     | 19.9 (18.1–21.8)          | 36.4 (33.0–39.9)      | 40.1 (36.6–43.7)     | 23.5 (20.7–26.7)          |
| 61 – 70 years         | 32.3 (29.1–35.6)      | 45.9 (42.5–49.3)     | 21.9 (19.2–24.8)          | 30.2 (27.7–32.9)      | 48.2 (45.4–51.0)     | 21.6 (19.4–23.9)          |
| 71+ years             | 23.9 (19.2–29.3)      | 50.9 (45.2–56.6)     | 25.2 (20.6–30.4)          | 22.0 (19.4–25.0)      | 56.6 (53.2–59.8)     | 21.4 (18.8–24.2)          |
| Marital status        |                       |                      |                           |                       |                      |                           |
| Not currently married | 25.6 (22.5–29.0)      | 48.3 (44.6–52.0)     | 26.1 (23.0–29.4)          | 23.8 (21.2–26.5)      | 52.9 (49.9–56.0)     | 23.3 (20.9–25.9)          |
| Currently married     | 39.5 (37.4–41.6)      | 41.2 (39.1–43.4)     | 19.3 (17.7–21.1)          | 32.4 (30.2–34.6)      | 46.3 (44.0–48.7)     | 21.3 (19.5–23.2)          |
| Educational level     |                       |                      |                           |                       |                      |                           |
| No education          | 24.8 (32.5–37.2)      | 44.8 (42.3–47.2)     | 20.4 (18.5–22.5)          | 29.6 (27.4–31.9)      | 52.4 (50.0–54.8)     | 18.0 (16.2–19.8)          |
| Primary               | 40.5 (36.9–44.2)      | 39.8 (36.2–46.3)     | 19.7 (17.0–22.7)          | 28.6 (25.3–32.1)      | 47.5 (43.7–51.3)     | 24.0 (20.9–27.3)          |
| Junior high school    | 34.4 (28.3–41.1)      | 39.6 (33.4–46.3)     | 25.9 (20.5–32.3)          | 31.6 (25.6–38.3)      | 32.1 (26.1–38.7)     | 36.3 (30.2–43.0)          |
| Senior high school    | 35.9 (30.2–42.1)      | 43.6 (37.5–49.8)     | 20.5 (15.8–25.9)          | 28.9 (23.4–35.0)      | 41.6 (35.6–48.0)     | 29.5 (24.1–35.5)          |
| Tertiary              | 23.7 (16.2–33.2)      | 41.9 (32.1–52.4)     | 34.4 (25.2–44.8)          | 23.0 (15.8–32.2)      | 35.7 (27.0–45.5)     | 41.2 (31.6–51.6)          |
| Ethnicity             |                       |                      |                           |                       |                      |                           |
| Javanese              | 37.0 (34.5–39.6)      | 43.6 (41.0–46.2)     | 19.4 (17.4–21.5)          | 29.7 (27.4–32.1)      | 50.6 (48.1–53.2)     | 19.7 (17.8–21.8)          |
| Sundanese             | 30.4 (25.9–35.2)      | 40.5 (35.7–45.5)     | 29.1 (24.8–33.9)          | 23.5 (19.6–27.9)      | 49.3 (44.3–54.2)     | 27.3 (23.1–31.8)          |
| Others                | 37.0 (34.2–39.9)      | 43.4 (40.5–46.3)     | 19.6 (17.4–22.0)          | 31.7 (29.0–34.7)      | 44.6 (41.6–47.7)     | 23.6 (21.2–26.2)          |
| Insurance coverage    |                       |                      |                           |                       |                      |                           |
| No                    | 36.5 (34.4–38.6)      | 43.2 (41.1–45.4)     | 20.3 (18.6–22.1)          | 31.1 (28.9–33.5)      | 50.2 (47.7–52.7)     | 18.7 (16.9–20.7)          |
| Yes                   | 34.2 (30.9–37.7)      | 42.5 (39.1–46.0)     | 23.2 (20.4–26.4)          | 26.7 (24.3–29.2)      | 46.8 (44.1–49.6)     | 26.4 (24.2–28.9)          |
| Type of work          |                       |                      |                           |                       |                      |                           |
| Unemployed            | 22.5 (19.6–25.6)      | 46.2 (42.6–49.8)     | 31.4 (28.1–34.9)          | 19.6 (17.4–22.1)      | 50.4 (47.5–53.3)     | 29.9 (27.4–32.6)          |
| Casual                | 41.8 (37.6–46.1)      | 41.3 (37.2–45.6)     | 16.9 (13.9–20.4)          | 36.5 (31.6–41.6)      | 49.7 (44.6–54.8)     | 13.8 (10.7–17.6)          |
| Self-employed         | 41.1 (38.4–43.9)      | 42.1 (39.4–44.8)     | 16.8 (14.9–18.9)          | 34.2 (31.5–37.0)      | 48.4 (45.4–51.3)     | 17.4 (15.4–19.7)          |
| Government/private    | 34.8 (29.8–40.2)      | 43.0 (37.7–48.4)     | 22.2 (18.0–27.1)          | 39.6 (33.0–46.5)      | 39.4 (32.9–46.3)     | 21.0 (15.8–27.4)          |
| Household expenditure |                       |                      |                           |                       |                      |                           |
| Q1 (the lowest)       | 39.9 (36.0–43.9)      | 44.1 (40.1–48.1)     | 15.8 (13.0–18.9)          | 30.9 (27.5–34.6)      | 55.6 (51.8–59.3)     | 13.5 (11.1–16.2)          |
| Q2                    | 39.6 (35.7–43.6)      | 42.4 (38.6–46.4)     | 17.9 (15.1–21.2)          | 31.6 (27.9–35.5)      | 49.5 (45.4–53.6)     | 18.9 (15.9–22.3)          |
| Q3                    | 36.4 (32.5–40.5)      | 43.1 (39.1–47.2)     | 20.5 (17.4–24.0)          | 31.4 (27.7–35.3)      | 46.5 (42.5–50.6)     | 22.1 (18.9–25.7)          |
| Q4                    | 31.7 (27.9–35.7)      | 44.6 (40.5–48.7)     | 23.6 (20.3–27.3)          | 27.0 (23.3–31.1)      | 47.8 (43.4–52.1)     | 25.3 (21.9–29.0)          |
| Q5 (the highest)      | 28.8 (24.9–33.0)      | 40.5 (36.3–44.9)     | 30.4 (26.5–34.7)          | 23.1 (19.6–27.0)      | 40.7 (36.5–45.0)     | 36.2 (32.2–40.5)          |
| Residency             |                       |                      |                           |                       |                      |                           |
| Rural                 | 38.7 (36.3–41.1)      | 43.2 (40.8–45.7)     | 18.1 (16.3–20.1)          | 31.0 (28.6–33.5)      | 52.1 (49.4–54.7)     | 16.9 (15.1–19.0)          |
| Urban                 | 31.2 (28.7–33.7)      | 42.7 (40.1–45.4)     | 26.1 (23.8–28.6)          | 27.3 (25.1–29.6)      | 45.0 (42.5–47.5)     | 27.7 (25.5–30.0)          |
| Island                |                       |                      |                           |                       |                      |                           |
| Java-Bali             | 36.5 (34.4–38.7)      | 41.9 (39.7–44.1)     | 21.6 (19.9–23.5)          | 29.7 (27.7–31.7)      | 49.3 (47.1–51.5)     | 21.1 (19.3–22.9)          |
| Sumatra               | 34.6 (31.0–38.4)      | 45.9 (42.0–49.8)     | 19.6 (16.7–22.8)          | 27.9 (24.6–31.6)      | 45.4 (41.6–49.4)     | 26.6 (23.3–30.2)          |
| Nusa Tenggara         | 44.0 (37.7–50.5)      | 41.6 (35.3–48.1)     | 14.5 (10.6–19.5)          | 31.4 (25.7–37.7)      | 54.1 (47.6–60.5)     | 14.5 (10.5–19.6)          |
| Kalimantan            | 25.2 (19.2–32.4)      | 56.9 (49.0–64.4)     | 17.9 (12.7–24.5)          | 23.4 (17.6–30.6)      | 42.4 (35.0–50.1)     | 34.2 (27.4–41.7)          |
| Sulawesi              | 30.0 (23.3–37.6)      | 50.4 (42.6–58.2)     | 19.6 (14.1–26.6)          | 26.7 (20.3–34.2)      | 49.7 (41.8–57.5)     | 23.7 (17.6–31.0)          |
| Overall (N, %)        | 1,272 (35.9)          | 1,605 (43.0)         | 801 (21.0)                | 1,052 (29.2)          | 1,751 (48.7)         | 875 (22.0)                |

**Figure S2. Prevalence of multimorbidity by age group and level of education**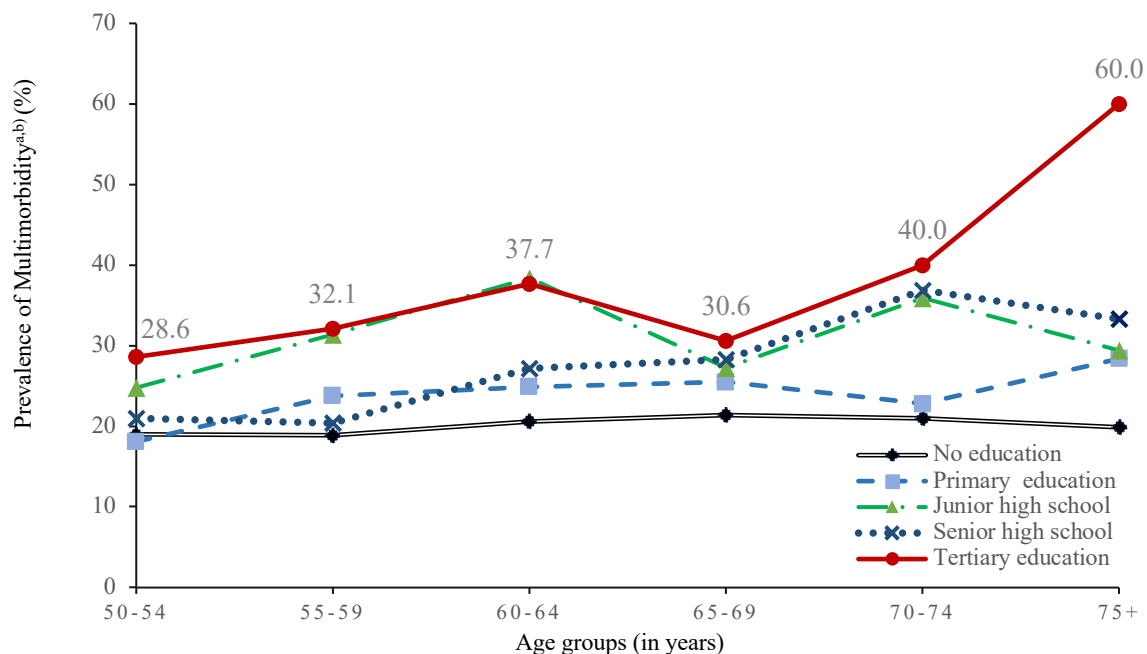

a) respondents who reported that they had 2 or more chronic conditions related to noncommunicable diseases (NCDs). b) Pooled sample of Wave 4 and Wave 5.

**Table S3. Intraclass correlation coefficients (ICC) on multimorbidity, health service use and labour participation**

|                   | Multimorbidity | Any outpatient visit | Any inpatient visit | 10% of total household expenditure | 25% of total household expenditure | 40% of non-food expenditure | Labour participation |
|-------------------|----------------|----------------------|---------------------|------------------------------------|------------------------------------|-----------------------------|----------------------|
| <b>Individual</b> |                |                      |                     |                                    |                                    |                             |                      |
| Variance (SE)     | 1.09 (0.25)    | 0.10 (0.18)          | 0.57 (0.74)         | 0 (0)                              | 0 (0)                              | 0 (0)                       | 1.22 (0.30)          |
| ICC (SE)          | 0.34 (0.03)    | 0.14 (0.03)          | 0.25 (0.12)         | 0.25 (0.03)                        | 0.48 (0.04)                        | 0.69 (0.04)                 | 0.48 (0.03)          |
| <b>Household</b>  |                |                      |                     |                                    |                                    |                             |                      |
| Variance (SE)     | 0.64 (0.20)    | 0.43 (0.14)          | 0.54 (0.57)         | 1.13 (0.20)                        | 3.08 (0.55)                        | 7.29 (1.3)                  | 1.70 (0.28)          |
| ICC (SE)          | 0.13 (0.40)    | 0.11 (0.04)          | 0.12 (0.12)         | 0.25 (0.03)                        | 0.48 (0.04)                        | 0.69 (0.04)                 | 0.28 (0.04)          |
| <b>District</b>   |                |                      |                     |                                    |                                    |                             |                      |
| Variance (SE)     | 0 (0)          | 0 (0)                | 0 (0)               | 0 (0)                              | 0 (0)                              | 0 (0)                       | 0.07 (0.04)          |
| ICC (SE)          | 0 (0)          | 0 (0)                | 0 (0)               | 0 (0)                              | 0 (0)                              | 0 (0)                       | 0.01 (0.01)          |

Note:

All models are controlled for study variables, including sex, age, marital status, education, ethnicity, insurance coverage, type of work, per capita expenditure (PCE), residency, and region. SE: standard error. ICC: intraclass correlation

**Table S4. Robustness check: descriptive summary and factors associated with multimorbidity (cross-sectional analysis of 2014 IFLS)**

| Characteristics          | Weighted %<br>Of sample | Zero NCD<br>(%, 95% CI) | One NCD<br>(%, 95% CI) | Two NCDs<br>(%, 95% CI) | Three or more<br>NCDs<br>(%, 95% CI) | Multimorbidity <sup>b</sup><br>(%, 95% CI) | aOR (95% CI)        |
|--------------------------|-------------------------|-------------------------|------------------------|-------------------------|--------------------------------------|--------------------------------------------|---------------------|
| Sex                      |                         |                         |                        |                         |                                      |                                            |                     |
| Female                   | 51.9                    | 24.8 (22.3, 26.3)       | 46.1 (44.4, 47.8)      | 18.8 (17.5, 20.1)       | 10.3 (9.3, 11.4)                     | 29.1 (27.6, 30.6)                          | 1                   |
| Male                     | 48.1                    | 36.5 (34.7, 38.3)       | 42.0 (40.2, 43.9)      | 14.0 (12.8, 15.4)       | 7.4 (6.5, 8.4)                       | 21.5 (20.0, 23.0)                          | 0.68*** (0.59–0.78) |
| Age                      |                         |                         |                        |                         |                                      |                                            |                     |
| 50 – 60 years            | 56.2                    | 35.3 (33.7, 37.1)       | 41.0 (39.3, 42.7)      | 15.2 (14.0, 16.5)       | 8.5 (7.6, 9.5)                       | 23.7 (22.8, 25.2)                          | 1                   |
| 61 – 70 years            | 25.6                    | 26.5 (24.4, 28.8)       | 45.4 (42.9, 47.9)      | 17.7 (15.9, 19.6)       | 10.4 (9.0, 11.9)                     | 28.1 (25.6, 30.3)                          | 1.23*** (1.10–1.42) |
| 71+ years                | 18.2                    | 20.8 (18.6, 23.3)       | 52.2 (49.4, 55.1)      | 18.8 (16.7, 21.0)       | 8.2 (6.8, 9.8)                       | 26.9 (24.6, 29.5)                          | 1.85 (0.99–1.42)    |
| Marital status           |                         |                         |                        |                         |                                      |                                            |                     |
| Not currently married    | 28.2                    | 24.7 (22.7, 26.8)       | 46.9 (44.6, 49.2)      | 19.3 (17.5, 21.2)       | 9.1 (8.0, 10.5)                      | 28.4 (26.4, 30.5)                          | 1                   |
| Currently married        | 71.8                    | 32.7 (31.3, 34.1)       | 43.1 (41.6, 44.6)      | 15.4 (14.4, 16.5)       | 8.8 (8.0, 9.7)                       | 24.2 (23.0, 25.5)                          | 1.05 (0.89–1.21)    |
| Educational level        |                         |                         |                        |                         |                                      |                                            |                     |
| No education             | 53.3                    | 31.3 (29.7, 33.0)       | 47.7 (45.9, 49.4)      | 14.1 (13.0, 15.4)       | 6.9 (6.1, 7.8)                       | 21.0 (19.7, 22.4)                          | 1                   |
| Primary                  | 23.8                    | 30.0 (27.6, 32.4)       | 42.8 (40.2, 45.4)      | 18.2 (16.3, 20.3)       | 9.0 (7.7, 10.6)                      | 27.2 (25.0, 29.6)                          | 1.35*** (1.16–1.57) |
| Junior high school       | 7.8                     | 30.9 (27.0, 35.1)       | 34.8 (30.7, 39.1)      | 20.2 (16.9, 23.9)       | 14.2 (11.4, 17.5)                    | 34.4 (30.3, 38.6)                          | 1.66*** (1.33–2.06) |
| Senior high school       | 10.0                    | 30.4 (26.9, 34.1)       | 38.7 (35.0, 42.6)      | 18.0 (15.3, 21.1)       | 12.8 (10.4, 15.7)                    | 30.9 (27.4, 34.5)                          | 1.23 (0.99–1.53)    |
| Tertiary                 | 5.1                     | 22.8 (18.5, 27.8)       | 38.7 (33.5, 44.2)      | 24.4 (20.0, 29.4)       | 14.1 (10.6, 18.4)                    | 38.4 (33.3, 43.9)                          | 1.77*** (1.33–2.36) |
| Ethnicity                |                         |                         |                        |                         |                                      |                                            |                     |
| Javanese                 | 56.3                    | 31.3 (29.7, 33.0)       | 45.7 (44.0, 47.5)      | 15.2 (14.0, 16.5)       | 7.7 (6.8, 8.6)                       | 22.9 (21.5, 24.4)                          | 1                   |
| Sundanese                | 15.5                    | 22.9 (20.1, 25.9)       | 43.4 (40.0, 46.8)      | 21.1 (18.4, 24.0)       | 12. (10.6, 15.1)                     | 33.7 (30.6, 37.0)                          | 1.53*** (1.28–1.83) |
| Others                   | 28.2                    | 32.7 (30.8, 34.7)       | 41.5 (39.4, 43.5)      | 16.5 (15.1, 18.0)       | 9.3 (8.2, 10.6)                      | 25.8 (24.1, 27.6)                          | 1.04 (0.89–1.22)    |
| Had any health insurance |                         |                         |                        |                         |                                      |                                            |                     |
| No                       | 53.9                    | 32.4 (30.8, 34.1)       | 46.2 (44.4, 47.9)      | 14.3 (13.1, 15.5)       | 7.1 (6.3, 8.1)                       | 21.4 (20.1, 22.9)                          | 1                   |
| Yes                      | 46.1                    | 28.1 (26.5, 29.8)       | 41.8 (40.0, 43.6)      | 19.0 (17.7, 20.5)       | 11.0 (9.9, 12.2)                     | 30.0 (28.4, 31.7)                          | 1.22*** (1.23–1.57) |
| Type of work             |                         |                         |                        |                         |                                      |                                            |                     |
| Unemployed               | 30.6                    | 19.8 (18.1, 21.7)       | 44.2 (42.0, 46.4)      | 21.3 (19.6, 23.2)       | 14.6 (13.2, 16.3)                    | 36.0 (33.9, 38.1)                          | 1                   |
| Casual                   | 15.6                    | 36.1 (33.0, 39.4)       | 45.5 (42.2, 48.7)      | 13.3 (11.3, 15.7)       | 5.0 (3.8, 6.6)                       | 18.4 (16.0, 21.0)                          | 0.50*** (0.41–0.62) |
| Self-employed            | 39.8                    | 34.6 (32.7, 36.6)       | 44.4 (42.4, 46.4)      | 14.5 (13.2, 16.0)       | 6.4 (5.5, 7.5)                       | 21.0 (19.4, 22.7)                          | 0.57*** (0.49–0.66) |
| Government/private       | 14.0                    | 35.2 (32.0, 38.6)       | 41.9 (38.6, 45.4)      | 15.0 (12.8, 17.5)       | 7.8 (6.2, 9.9)                       | 22.8 (20.1, 25.8)                          | 0.50*** (0.40–0.62) |
| Household expenditure    |                         |                         |                        |                         |                                      |                                            |                     |
| Q1 (the lowest)          | 21.3                    | 33.2 (30.7, 35.9)       | 49.3 (46.5, 52.1)      | 12.7 (11.0, 14.6)       | 4.8 (3.7, 6.1)                       | 17.5 (15.5, 19.6)                          | 1                   |
| Q2                       | 20.9                    | 33.5 (30.8, 36.2)       | 45.0 (42.3, 47.9)      | 15.6 (13.7, 17.7)       | 5.8 (4.6, 7.3)                       | 21.5 (19.2, 23.8)                          | 1.28** (1.05–1.58)  |
| Q3                       | 19.8                    | 31.7 (29.1, 34.4)       | 43.7 (41.0, 46.5)      | 6.0 (4.0, 18.1)         | 8.6 (7.2, 10.3)                      | 24.6 (22.2, 17.1)                          | 1.46*** (1.19–1.78) |
| Q4                       | 19.5                    | 28.8 (26.3, 31.5)       | 41.5 (38.7, 44.3)      | 18.8 (16.7, 21.1)       | 10.9 (9.3, 12.7)                     | 19.7 (27.2, 32.3)                          | 1.80*** (1.47–2.20) |
| Q5 (the highest)         | 18.5                    | 24.0 (21.7, 26.5)       | 40.5 (37.8, 43.3)      | 19.9 (17.8, 22.2)       | 15.5 (13.5, 17.6)                    | 35.4 (32.8, 38.1)                          | 2.03*** (1.65–2.50) |
| Residency                |                         |                         |                        |                         |                                      |                                            |                     |
| Rural                    | 48.9                    | 33.3 (31.5, 35.1)       | 46.4(44.5, 48.3)       | 14.2 (12.9, 15.5)       | 6.1 (5.2, 7.0)                       | 20.3 (18.8, 21.8)                          | 1                   |
| Urban                    | 51.3                    | 27.7 (26.2, 29.2)       | 42.0 (40.3, 43.7)      | 19.0 (17.4, 20.0)       | 11.6 (10.6, 12.7)                    | 30.3 (28.8, 31.9)                          | 1.37*** (1.19–1.56) |
| Island                   |                         |                         |                        |                         |                                      |                                            |                     |
| Java-Bali                | 78.6                    | 30.3 (28.9, 31.7)       | 44.7 (43.2, 16.2)      | 16.0 (15.0, 17.1)       | 9.0 (8.2, 9.9)                       | 25.1 (23.8, 26.4)                          | 1                   |
| Sumatra                  | 14.0                    | 30.6 (28.2, 33.1)       | 41.1 (38.5, 43.7)      | 19.1 (17.1, 21.2)       | 9.2 (7.8, 10.8)                      | 28.3 (26.0, 30.7)                          | 1.34*** (1.14–1.58) |
| Nusa Tenggara            | 2.4                     | 37.2 (32.9, 41.7)       | 47.2 (42.7, 51.7)      | 13.3 (10.5, 16.6)       | 2.3 (12.8, 4.1)                      | 15.6 (12.6, 19.1)                          | 0.62*** (0.46–0.83) |
| Kalimantan               | 2.4                     | 24.3 (19.7, 29.5)       | 41.5 (36.1, 47.2)      | 22.9 (18.6, 27.9)       | 11.3 (8.2, 15.3)                     | 34.2 (29.1, 39.7)                          | 2.02*** (1.53–2.67) |
| Sulawesi                 | 2.6                     | 33.6 (28.7, 38.9)       | 44.7 (39.4, 50.0)      | 14.2 (10.9, 18.4)       | 7.5 (5.2, 10.6)                      | 21.7 (17.7, 26.4)                          | 0.87 (0.64–1.18)    |
| Overall Sample           | 100                     | 30.4 (29.3, 31.6)       | 44.1 (42.9, 45.4)      | 16.5 (15.6, 17.4)       | 8.9 (8.2, 9.6)                       | 25.4 (24.3, 26.5)                          |                     |

<sup>a</sup> Weighted sample size  
<sup>b</sup> We defined multimorbidity if the respondents reported that they had 2 or more chronic conditions related to NCDs. Chronic diseases in IFLS5 included hypertension, diabetes mellitus, asthma, chronic heart diseases, mental health issue, stroke, liver diseases, cancer/malignancies, liver, arthritis, high cholesterol, prostate illness kidney diseases, digestive system diseases.  
aOR: adjusted odds ratio  
\*\*\* p<0.01, \*\* p<0.05

**Table S5. Robustness check: The effect of multimorbidity on health service use (cross-sectional analysis of 2014 IFLS)**

| Variables                             | Health service use        |                                  |                           |                                  |
|---------------------------------------|---------------------------|----------------------------------|---------------------------|----------------------------------|
|                                       | Outpatient                |                                  | Inpatient                 |                                  |
|                                       | Any visit<br>aOR (95% CI) | Number of visits<br>IRR (95% CI) | Any visit<br>aOR (95% CI) | Number of visits<br>IRR (95% CI) |
| Number of NCDs (ref. no NCD)          |                           |                                  |                           |                                  |
| Single NCD                            | 1.54*** (1.30–1.82)       | 1.50*** (1.24–1.81)              | 1.73** (1.17–2.56)        | 2.03*** (1.36–3.03)              |
| Two NCDs                              | 2.77*** (2.29–3.36)       | 2.68*** (2.15–3.34)              | 3.47*** (2.31–5.21)       | 4.03*** (2.66–6.08)              |
| Three or more NCDs                    | 4.51*** (3.61–5.63)       | 3.85*** (3.06–4.84)              | 6.85*** (4.45–10.52)      | 8.78*** (5.73–13.45)             |
| Sex (ref. Male)                       |                           |                                  |                           |                                  |
| Female                                | 1.26*** (1.09–1.45)       | 1.18** (1.02–1.35)               | 0.93 (0.72–1.22)          | 0.81 (0.62–1.07)                 |
| Age (ref. 50 – 60 years)              |                           |                                  |                           |                                  |
| 61 – 70 years                         | 1.01 (0.87–1.18)          | 0.93 (0.80–1.08)                 | 1.23 (0.91–1.65)          | 1.23 (0.88–1.72)                 |
| 71+ years                             | 1.03 (0.85–1.25)          | 1.01 (0.84–1.21)                 | 1.42 (1.02–2.00)          | 1.53** (1.01–2.32)               |
| Marital status (ref. Not married)     |                           |                                  |                           |                                  |
| Currently married                     | 1.09 (0.93–1.27)          | 1.04 (0.90–1.21)                 | 1.07 (0.80–1.41)          | 0.93 (0.70–1.25)                 |
| Educational level (ref. No education) |                           |                                  |                           |                                  |
| Primary                               | 0.94 (0.80–1.10)          | 0.87* (0.74–1.01)                | 1.02 (0.75–1.39)          | 0.96 (0.69–1.35)                 |
| Junior high school                    | 1.02 (0.80–1.31)          | 1.07 (0.76–1.52)                 | 0.72 (0.45–1.14)          | 0.82 (0.47–1.44)                 |
| Senior high school                    | 0.87 (0.68–1.10)          | 0.80* (0.64–1.00)                | 0.69 (0.44–1.08)          | 0.63* (0.39–1.00)                |
| Tertiary                              | 0.99 (0.73–1.33)          | 0.79 (0.55–1.13)                 | 0.58* (0.33–1.02)         | 0.55* (0.30–1.00)                |
| Ethnicity (ref. Javanese)             |                           |                                  |                           |                                  |
| Sundanese                             | 0.93 (0.77–1.13)          | 0.97 (0.81–1.17)                 | 1.17 (0.84–1.63)          | 1.21 (0.82–1.79)                 |
| Others                                | 1.06 (0.89–1.25)          | 0.99 (0.84–1.17)                 | 0.78 (0.56–1.08)          | 0.87 (0.62–1.22)                 |
| Insurance coverage (ref. No)          |                           |                                  |                           |                                  |
| Yes                                   | 1.20*** (1.06–1.37)       | 1.25*** (1.10–1.44)              | 2.28*** (1.77–2.95)       | 2.19*** (1.66–2.89)              |
| Type of work (ref. Unemployed)        |                           |                                  |                           |                                  |
| Casual                                | 0.73*** (0.59–0.90)       | 0.73*** (0.60–0.89)              | 0.41*** (0.25–0.67)       | 0.35*** (0.22–0.55)              |
| Self-employed                         | 0.77*** (0.66–0.90)       | 0.77*** (0.66–0.90)              | 0.64*** (0.47–0.87)       | 0.64*** (0.46–0.90)              |
| Government/private                    | 0.70*** (0.56–0.88)       | 0.75*** (0.60–0.93)              | 0.43*** (0.28–0.66)       | 0.53** (0.30–0.94)               |
| Per capita expenditure (ref. Q1)      |                           |                                  |                           |                                  |
| Q2                                    | 1.36*** (1.10–1.68)       | 1.40*** (1.14–1.73)              | 0.86 (0.57–1.31)          | 0.76 (0.48–1.18)                 |
| Q3                                    | 1.50*** (1.21–1.85)       | 1.71*** (1.35–2.17)              | 1.16 (0.78–1.72)          | 1.29 (0.80–2.05)                 |
| Q4                                    | 1.93*** (1.56–2.38)       | 1.75*** (1.44–2.14)              | 1.24 (0.83–1.85)          | 1.35 (0.87–2.08)                 |
| Q5                                    | 1.87*** (1.50–2.33)       | 2.02*** (1.63–2.51)              | 2.06*** (1.38–3.06)       | 1.98*** (1.32–2.96)              |
| Residency (ref. Rural)                |                           |                                  |                           |                                  |
| Urban                                 | 0.94 (0.82–1.08)          | 0.98 (0.86–1.13)                 | 0.93 (0.71–1.21)          | 1.03 (0.79–1.34)                 |
| Region (ref. Java-Bali)               |                           |                                  |                           |                                  |
| Sumatra                               | 0.72*** (0.60–0.86)       | 0.86 (0.72–1.03)                 | 1.32 (0.96–1.82)          | 1.46** (1.04–2.06)               |
| Nusa Tenggara                         | 0.84 (0.63–1.12)          | 0.84 (0.63–1.12)                 | 1.83** (1.09–3.06)        | 1.87** (1.08–3.25)               |
| Kalimantan                            | 0.81 (0.59–1.11)          | 0.85 (0.62–1.14)                 | 1.46 (0.82–2.58)          | 1.4 (0.81–2.42)                  |
| Sulawesi                              | 0.54*** (0.39–0.75)       | 0.53*** (0.39–0.71)              | 1.45 (0.81–2.60)          | 1.59 (0.85–2.98)                 |

Chronic diseases in IFLS5 included hypertension-diabetes mellitus-asthma-chronic heart diseases-mental health issue-stroke-liver diseases-cancer/malignancies-liver-arthritis-high cholesterol-prostate illness kidney diseases-digestive system diseases.

aOR: adjusted odds ratio, IRR: incidence rate ratio, NCD: noncommunicable disease

\*\*\* p<0.01, \*\* p<0.05



**Table S6. Robustness check: The effect of multimorbidity on catastrophic health expenditure (cross-sectional analysis of 2014 IFLS)**

| Variables                             | Catastrophic health expenditure    |                                    |                             |
|---------------------------------------|------------------------------------|------------------------------------|-----------------------------|
|                                       | 10% of total household expenditure | 25% of total household expenditure | 40% of non-food expenditure |
|                                       | aOR (95% CI)                       | aOR (95% CI)                       | aOR (95% CI)                |
| Number of NCDs (ref. no NCD)          |                                    |                                    |                             |
| Single NCD                            | 1.25 (0.94–1.66)                   | 1.18 (0.67–2.09)                   | 1.58 (0.98–2.57)            |
| Two NCDs                              | 2.03*** (1.48–2.79)                | 2.10** (1.12–3.93)                 | 2.39*** (1.38–4.14)         |
| Three or more NCDs                    | 2.24*** (1.57–3.20)                | 2.09** (1.06–4.12)                 | 2.17** (1.18–4.01)          |
| Sex (ref. Male)                       |                                    |                                    |                             |
| Female                                | 0.87 (0.68–1.12)                   | 0.74 (0.43–1.27)                   | 0.90 (0.59–1.37)            |
| Age (ref. 50 – 60 years)              |                                    |                                    |                             |
| 61 – 70 years                         | 1.24 (0.96–1.60)                   | 1.34 (0.82–2.20)                   | 1.42 (0.94–2.14)            |
| 71+ years                             | 1.32 (0.96–1.81)                   | 1.06 (0.53–2.13)                   | 1.48 (0.88–2.51)            |
| Marital status (ref. Not married)     |                                    |                                    |                             |
| Currently married                     | 1.44** (1.08–1.91)                 | 1.69* (0.91–3.17)                  | 1.94*** (1.20–3.14)         |
| Educational level (ref. No education) |                                    |                                    |                             |
| Primary                               | 1.14 (0.88–1.48)                   | 1.31 (0.79–2.17)                   | 1.46 (0.98–2.18)            |
| Junior high school                    | 1.11 (0.76–1.63)                   | 1.28 (0.67–2.46)                   | 1.12 (0.63–1.98)            |
| Senior high school                    | 0.73 (0.49–1.08)                   | 0.52 (0.22–1.23)                   | 0.45** (0.21–0.97)          |
| Tertiary                              | 0.74 (0.43–1.27)                   | 0.22 (0.05–1.01)                   | 0.12** (0.02–0.66)          |
| Ethnicity (ref. Javanese)             |                                    |                                    |                             |
| Sundanese                             | 0.87 (0.64–1.18)                   | 1.09 (0.62–1.89)                   | 0.83 (0.51–1.35)            |
| Others                                | 0.79 (0.60–1.04)                   | 0.65 (0.36–1.18)                   | 0.47*** (0.28–0.78)         |
| Insurance coverage (ref. No)          |                                    |                                    |                             |
| Yes                                   | 1 (0.81–1.25)                      | 1.07 (0.71–1.61)                   | 1.02 (0.72–1.44)            |
| Type of work (ref. Unemployed)        |                                    |                                    |                             |
| Casual                                | 0.66** (0.46–0.95)                 | 0.56 (0.27–1.16)                   | 0.56 (0.31–1.04)            |
| Self-employed                         | 0.70*** (0.53–0.91)                | 0.44*** (0.24–0.79)                | 0.54*** (0.34–0.85)         |
| Government/private                    | 0.57*** (0.39–0.83)                | 0.41** (0.19–0.88)                 | 0.46** (0.23–0.91)          |
| Per capita expenditure (ref. Q1)      |                                    |                                    |                             |
| Q2                                    | 0.96 (0.65–1.43)                   | 1.05 (0.47–2.35)                   | 1.24 (0.67–2.33)            |
| Q3                                    | 1.42 (0.99–2.02)                   | 1 (0.46–2.17)                      | 1.08 (0.58–2.01)            |
| Q4                                    | 1.59** (1.11–2.27)                 | 2.37** (1.15–4.86)                 | 2.18*** (1.21–3.92)         |
| Q5                                    | 2.53*** (1.76–3.62)                | 2.44** (1.18–5.05)                 | 2.75*** (1.51–5.02)         |
| Residency (ref. Rural)                |                                    |                                    |                             |
| Urban                                 | 1.01 (0.80–1.26)                   | 0.87 (0.56–1.37)                   | 0.94 (0.65–1.35)            |
| Region (ref. Java-Bali)               |                                    |                                    |                             |
| Sumatra                               | 0.94 (0.71–1.24)                   | 0.94 (0.55–1.60)                   | 1.36 (0.88–2.09)            |
| Nusa Tenggara                         | 0.81 (0.48–1.37)                   | 1.49 (0.59–3.76)                   | 1.57 (0.68–3.66)            |
| Kalimantan                            | 1.13 (0.69–1.84)                   | 1.5 (0.59–3.83)                    | 1.56 (0.71–3.47)            |
| Sulawesi                              | 1.02 (0.60–1.73)                   | 0.4 (0.08–2.07)                    | 1.18 (0.45–3.10)            |

Chronic diseases in IFLS5 included hypertension-diabetes mellitus-asthma-chronic heart diseases-mental health issue-stroke-liver diseases-cancer/malignancies-liver-arthritis-high cholesterol-prostate illness kidney diseases-digestive system diseases.

aOR: adjusted odds ratio, IRR: incidence rate ratio, NCD: noncommunicable disease

\*\*\* p<0.01, \*\* p<0.05



**Table S7. Robustness check: The effect of multimorbidity on productivity loss (cross-sectional analysis of 2014 IFLS)**

| Variables                         | Productivity loss                    |                                              |                                    |
|-----------------------------------|--------------------------------------|----------------------------------------------|------------------------------------|
|                                   | Labour participation<br>aOR (95% CI) | Days primary activity missed<br>IRR (95% CI) | Days stayed in bed<br>IRR (95% CI) |
| Number of NCDs (ref. no NCD)      |                                      |                                              |                                    |
| Single NCD                        | 0.76*** (0.65–0.89)                  | 1.48*** (1.29–1.70)                          | 1.32** (1.01–1.72)                 |
| Two NCDs                          | 0.54*** (0.45–0.65)                  | 2.42*** (2.09–2.80)                          | 2.18*** (1.60–2.97)                |
| Three or more NCDs                | 0.32*** (0.26–0.40)                  | 3.29*** (2.79–3.87)                          | 2.80*** (2.02–3.88)                |
| Sex (ref. Male)                   |                                      |                                              |                                    |
| Female                            | 0.31*** (0.27–0.35)                  | 1.05 (0.94–1.18)                             | 1.22 (0.97–1.54)                   |
| Age (ref. 50 – 60 years)          |                                      |                                              |                                    |
| 61 – 70 years                     | 0.40*** (0.34–0.46)                  | 0.97 (0.86–1.10)                             | 0.93 (0.72–1.21)                   |
| 71+ years                         | 0.15*** (0.13–0.18)                  | 1.19** (1.03–1.37)                           | 1.78*** (1.33–2.36)                |
| Marital status (ref. Not married) |                                      |                                              |                                    |
| Currently married                 | 1.22*** (1.05–1.41)                  | 1.07 (0.95–1.20)                             | 0.93 (0.72–1.21)                   |
| Primary                           | 1.08 (0.92–1.26)                     | 1.02 (0.90–1.17)                             | 1.03 (0.81–1.32)                   |
| Junior high school                | 0.64*** (0.51–0.81)                  | 1.02 (0.85–1.22)                             | 1.01 (0.64–1.61)                   |
| Senior high school                | 0.61*** (0.49–0.76)                  | 0.73*** (0.60–0.89)                          | 0.73 (0.46–1.15)                   |
| Tertiary                          | 1.09 (0.79–1.48)                     | 0.59*** (0.43–0.83)                          | 0.37*** (0.19–0.71)                |
| Ethnicity (ref. Javanese)         |                                      |                                              |                                    |
| Sundanese                         | 0.69*** (0.57–0.83)                  | 1.25*** (1.10–1.43)                          | 1.70*** (1.29–2.24)                |
| Others                            | 0.72*** (0.61–0.86)                  | 0.93 (0.81–1.07)                             | 1.34** (1.01–1.77)                 |
| Insurance coverage (ref. No)      |                                      |                                              |                                    |
| Yes                               | 0.91 (0.80–1.04)                     | 1.02 (0.92–1.13)                             | 0.87 (0.71–1.06)                   |
| Type of work (ref. Unemployed)    |                                      |                                              |                                    |
| Casual                            |                                      | 0.51*** (0.43–0.60)                          | 0.28*** (0.20–0.39)                |
| Self-employed                     |                                      | 0.55*** (0.49–0.63)                          | 0.33*** (0.26–0.42)                |
| Government/private                | n/a                                  | 0.44*** (0.37–0.54)                          | 0.22*** (0.14–0.33)                |
| Per capita expenditure (ref. Q1)  |                                      |                                              |                                    |
| Q2                                | 1.25** (1.03–1.52)                   | 1.02 (0.88–1.19)                             | 1.11 (0.82–1.51)                   |
| Q3                                | 1.17 (0.96–1.43)                     | 1.12 (0.95–1.32)                             | 0.8 (0.59–1.09)                    |
| Q4                                | 0.96 (0.79–1.17)                     | 0.95 (0.81–1.12)                             | 0.89 (0.66–1.21)                   |
| Q5                                | 1.07 (0.86–1.32)                     | 1.02 (0.86–1.20)                             | 0.83 (0.61–1.14)                   |
| Residency (ref. Rural)            |                                      |                                              |                                    |
| Urban                             | 0.57*** (0.50–0.65)                  | 1 (0.90–1.12)                                | 0.88 (0.72–1.09)                   |
| Region (ref. Java-Bali)           |                                      |                                              |                                    |
| Sumatra                           | 1.04 (0.87–1.23)                     | 1.12 (0.97–1.29)                             | 1.03 (0.78–1.36)                   |
| Nusa Tenggara                     | 1.17 (0.89–1.54)                     | 1.14 (0.92–1.42)                             | 0.91 (0.59–1.40)                   |
| Kalimantan                        | 1.42** (1.02–1.99)                   | 1.16 (0.91–1.48)                             | 0.73 (0.48–1.10)                   |
| Sulawesi                          | 0.59*** (0.43–0.79)                  | 1.39** (1.07–1.81)                           | 1.05 (0.70–1.59)                   |

Chronic diseases in IFLS5 included hypertension-diabetes mellitus-asthma-chronic heart diseases-mental health issue-stroke-liver diseases-cancer/malignancies-liver-arthritis-high cholesterol-prostate illness kidney diseases-digestive system diseases.

aOR: adjusted odds ratio, IRR: incidence rate ratio, NCD: noncommunicable disease

\*\*\* p<0.01, \*\* p<0.05

**Table S8. Sensitivity analysis: the effect of multimorbidity on health service use**  
Obesity (BMI  $\geq 25$  kg/m<sup>2</sup> as obese) is included in the clustering of multimorbidity

| Variables                                  | Health service use      |              |                                |              |                         |              |                                |       |
|--------------------------------------------|-------------------------|--------------|--------------------------------|--------------|-------------------------|--------------|--------------------------------|-------|
|                                            | Outpatient              |              |                                |              | Inpatient               |              |                                |       |
|                                            | Any visit <sup>a)</sup> |              | Number of visits <sup>b)</sup> |              | Any visit <sup>a)</sup> |              | Number of visits <sup>b)</sup> |       |
| aOR (95% CI)                               | p values                | IRR (95% CI) | p values                       | aOR (95% CI) | p values                | IRR (95% CI) | p values                       |       |
| Number of NCDs (ref. no NCD)               |                         |              |                                |              |                         |              |                                |       |
| Single NCD                                 | 1.18 (0.98–1.43)        | 0.086        | 1.24 (1.04–1.50)               | 0.020        | 1.16 (0.79–1.70)        | 0.451        | 1.16 (0.79–1.70)               | 0.488 |
| Two NCDs                                   | 1.82 (1.47–2.25)        | 0.000        | 1.83 (1.50–2.25)               | 0.000        | 1.78 (1.18–2.69)        | 0.006        | 1.78 (1.18–2.69)               | 0.002 |
| Three or more NCDs                         | 3.27 (2.55–4.19)        | 0.000        | 2.85 (2.26–3.60)               | 0.000        | 2.73 (1.76–4.25)        | 0.000        | 2.73 (1.76–4.25)               | 0.000 |
| Period (ref.2007)                          |                         |              |                                |              |                         |              |                                |       |
| 2014                                       | 1.33 (1.15–1.53)        | 0.000        | 1.29 (1.12–1.49)               | 0.000        | 1.72 (1.29–2.29)        | 0.000        | 1.72 (1.29–2.29)               | 0.000 |
| Sex (ref. Male)                            |                         |              |                                |              |                         |              |                                |       |
| Female                                     | 1.19 (1.00–1.41)        | 0.049        | 1.13 (0.96–1.33)               | 0.139        | 0.91 (0.67–1.24)        | 0.537        | 0.91 (0.67–1.24)               | 0.413 |
| Age (ref. 50 – 60 years)                   |                         |              |                                |              |                         |              |                                |       |
| 61 – 70 years                              | 1.06 (0.90–1.26)        | 0.475        | 1.05 (0.89–1.23)               | 0.588        | 1.09 (0.79–1.50)        | 0.603        | 1.09 (0.79–1.50)               | 0.332 |
| 71+ years                                  | 1.20 (0.96–1.50)        | 0.109        | 1.15 (0.93–1.41)               | 0.187        | 1.58 (1.07–2.33)        | 0.020        | 1.58 (1.07–2.33)               | 0.020 |
| Marital status (ref. Not married)          |                         |              |                                |              |                         |              |                                |       |
| Currently married                          | 1.09 (0.92–1.31)        | 0.323        | 1.15 (0.97–1.36)               | 0.105        | 1.05 (0.77–1.44)        | 0.742        | 1.05 (0.77–1.44)               | 0.962 |
| Educational level (ref. No education)      |                         |              |                                |              |                         |              |                                |       |
| Primary                                    | 1.06 (0.88–1.27)        | 0.556        | 0.97 (0.82–1.16)               | 0.760        | 1.09 (0.78–1.51)        | 0.630        | 1.09 (0.78–1.51)               | 0.796 |
| Junior high school                         | 1.04 (0.78–1.40)        | 0.777        | 1.11 (0.85–1.46)               | 0.441        | 1.18 (0.73–1.92)        | 0.498        | 1.18 (0.73–1.92)               | 0.105 |
| Senior high school                         | 1.01 (0.76–1.35)        | 0.954        | 0.94 (0.72–1.23)               | 0.636        | 0.78 (0.47–1.29)        | 0.335        | 0.78 (0.47–1.29)               | 0.147 |
| Tertiary                                   | 1.18 (0.79–1.76)        | 0.427        | 0.84 (0.57–1.23)               | 0.371        | 0.94 (0.50–1.78)        | 0.858        | 0.94 (0.50–1.78)               | 0.495 |
| Ethnicity (ref. Javanese)                  |                         |              |                                |              |                         |              |                                |       |
| Sundanese                                  | 0.91 (0.72–1.16)        | 0.456        | 0.92 (0.74–1.15)               | 0.486        | 0.90 (0.59–1.37)        | 0.628        | 0.90 (0.59–1.37)               | 0.944 |
| Others                                     | 1.02 (0.85–1.24)        | 0.802        | 0.92 (0.77–1.09)               | 0.313        | 0.91 (0.65–1.28)        | 0.603        | 0.91 (0.65–1.28)               | 0.557 |
| Insurance coverage (ref. No)               |                         |              |                                |              |                         |              |                                |       |
| Yes                                        | 1.48 (1.27–1.73)        | 0.000        | 1.57 (1.36–1.81)               | 0.000        | 2.02 (1.52–2.69)        | 0.000        | 2.02 (1.52–2.69)               | 0.000 |
| Type of work (ref. Unemployed)             |                         |              |                                |              |                         |              |                                |       |
| Casual                                     | 0.77 (0.61–0.97)        | 0.025        | 0.66 (0.53–0.82)               | 0.000        | 0.48 (0.30–0.79)        | 0.003        | 0.48 (0.30–0.79)               | 0.001 |
| Self-employed                              | 0.83 (0.70–0.99)        | 0.041        | 0.76 (0.64–0.89)               | 0.001        | 0.60 (0.43–0.83)        | 0.002        | 0.60 (0.43–0.83)               | 0.001 |
| Government/private                         | 0.74 (0.56–0.98)        | 0.034        | 0.67 (0.52–0.88)               | 0.004        | 0.61 (0.36–1.02)        | 0.061        | 0.61 (0.36–1.02)               | 0.242 |
| Per capita household expenditure (ref. Q1) |                         |              |                                |              |                         |              |                                |       |
| Q2                                         | 1.48 (1.17–1.86)        | 0.001        | 1.50 (1.20–1.87)               | 0.000        | 1.26 (0.80–2.01)        | 0.322        | 1.26 (0.80–2.01)               | 0.500 |
| Q3                                         | 1.71 (1.35–2.15)        | 0.000        | 1.74 (1.39–2.17)               | 0.000        | 1.77 (1.14–2.76)        | 0.012        | 1.77 (1.14–2.76)               | 0.003 |
| Q4                                         | 1.70 (1.34–2.16)        | 0.000        | 1.77 (1.41–2.22)               | 0.000        | 1.44 (0.90–2.31)        | 0.131        | 1.44 (0.90–2.31)               | 0.092 |
| Q5                                         | 1.79 (1.39–2.31)        | 0.000        | 1.98 (1.56–2.51)               | 0.000        | 2.67 (1.68–4.26)        | 0.000        | 2.67 (1.68–4.26)               | 0.000 |
| Residency (ref. Rural)                     |                         |              |                                |              |                         |              |                                |       |
| Urban                                      | 0.87 (0.74–1.02)        | 0.093        | 0.92 (0.79–1.07)               | 0.258        | 0.96 (0.72–1.28)        | 0.775        | 0.96 (0.72–1.28)               | 0.689 |
| Region (ref. Java-Bali)                    |                         |              |                                |              |                         |              |                                |       |
| Sumatra                                    | 0.83 (0.67–1.03)        | 0.094        | 1.03 (0.85–1.26)               | 0.736        | 1.21 (0.84–1.75)        | 0.294        | 1.21 (0.84–1.75)               | 0.322 |
| Nusa Tenggara                              | 0.69 (0.48–0.99)        | 0.043        | 0.62 (0.44–0.87)               | 0.006        | 1.24 (0.69–2.22)        | 0.467        | 1.24 (0.69–2.22)               | 0.707 |
| Kalimantan                                 | 1.04 (0.71–1.50)        | 0.851        | 1.31 (0.94–1.83)               | 0.115        | 0.99 (0.50–1.97)        | 0.982        | 0.99 (0.50–1.97)               | 0.764 |
| Sulawesi                                   | 0.72 (0.48–1.07)        | 0.107        | 0.68 (0.47–0.99)               | 0.043        | 0.52 (0.22–1.22)        | 0.134        | 0.52 (0.22–1.22)               | 0.055 |

<sup>a)</sup> Multilevel logistic regression model

<sup>b)</sup> Multilevel negative binomial regression model

Obesity (BMI  $\geq 25$  kg/m<sup>2</sup> as obese) is included in the clustering of multimorbidity

aOR: adjusted odds ratio, IRR: Incidence rate ratio, NCD: noncommunicable disease

**Table S9. Sensitivity analysis: the effect of multimorbidity on catastrophic expenditure**  
Obesity (BMI  $\geq 25$  kg/m<sup>2</sup> as obese) is included in the clustering of multimorbidity

| Variables                                  | Catastrophic health expenditure                  |          |                                                  |          |                                           |          |
|--------------------------------------------|--------------------------------------------------|----------|--------------------------------------------------|----------|-------------------------------------------|----------|
|                                            | 10% of total household expenditure <sup>a)</sup> |          | 25% of total household expenditure <sup>a)</sup> |          | 40% of non-food expenditure <sup>a)</sup> |          |
|                                            | aOR (95% CI)                                     | p values | aOR (95% CI)                                     | p values | aOR (95% CI)                              | p values |
| Number of NCDs (ref. no NCD)               |                                                  |          |                                                  |          |                                           |          |
| Single NCD                                 | 1.12 (0.84–1.51)                                 | 0.434    | 0.89 (0.54–1.47)                                 | 0.642    | 0.93 (0.62–1.41)                          | 0.743    |
| Two NCDs                                   | 1.23 (0.88–1.72)                                 | 0.235    | 1.27 (0.74–2.17)                                 | 0.382    | 1.22 (0.77–1.91)                          | 0.396    |
| Three or more NCDs                         | 1.66 (1.12–2.45)                                 | 0.011    | 0.99 (0.50–1.94)                                 | 0.976    | 1.08 (0.63–1.88)                          | 0.773    |
| Period (ref.2007)                          |                                                  |          |                                                  |          |                                           |          |
| 2014                                       | 1.37 (1.09–1.74)                                 | 0.008    | 1.21 (0.81–1.81)                                 | 0.351    | 1.16 (0.84–1.62)                          | 0.367    |
| Sex (ref. Male)                            |                                                  |          |                                                  |          |                                           |          |
| Female                                     | 0.92 (0.72–1.19)                                 | 0.528    | 1.00 (0.64–1.54)                                 | 0.991    | 1.01 (0.70–1.45)                          | 0.949    |
| Age (ref. 50 – 60 years)                   |                                                  |          |                                                  |          |                                           |          |
| 61 – 70 years                              | 1.18 (0.91–1.53)                                 | 0.207    | 1.47 (0.95–2.29)                                 | 0.085    | 1.49 (1.03–2.16)                          | 0.033    |
| 71+ years                                  | 1.08 (0.77–1.53)                                 | 0.651    | 0.87 (0.45–1.67)                                 | 0.672    | 1.37 (0.83–2.25)                          | 0.218    |
| Marital status (ref. Not married)          |                                                  |          |                                                  |          |                                           |          |
| Currently married                          | 1.54 (1.15–2.05)                                 | 0.003    | 1.66 (1.01–2.71)                                 | 0.044    | 1.82 (1.21–2.72)                          | 0.004    |
| Educational level (ref. No education)      |                                                  |          |                                                  |          |                                           |          |
| Primary                                    | 0.93 (0.70–1.23)                                 | 0.607    | 0.87 (0.53–1.44)                                 | 0.596    | 0.88 (0.59–1.31)                          | 0.530    |
| Junior high school                         | 0.88 (0.57–1.35)                                 | 0.555    | 1.04 (0.51–2.09)                                 | 0.921    | 0.67 (0.35–1.28)                          | 0.227    |
| Senior high school                         | 0.85 (0.55–1.29)                                 | 0.442    | 1.05 (0.53–2.07)                                 | 0.885    | 0.82 (0.45–1.47)                          | 0.500    |
| Tertiary                                   | 0.39 (0.18–0.84)                                 | 0.016    | 0.13 (0.02–0.96)                                 | 0.045    | 0.18 (0.04–0.75)                          | 0.018    |
| Ethnicity (ref. Javanese)                  |                                                  |          |                                                  |          |                                           |          |
| Sundanese                                  | 0.83 (0.57–1.21)                                 | 0.339    | 1.64 (0.91–2.95)                                 | 0.099    | 1.17 (0.71–1.94)                          | 0.529    |
| Others                                     | 0.75 (0.56–1.02)                                 | 0.069    | 0.96 (0.57–1.60)                                 | 0.872    | 0.72 (0.47–1.10)                          | 0.129    |
| Insurance coverage (ref. No)               |                                                  |          |                                                  |          |                                           |          |
| Yes                                        | 0.94 (0.74–1.20)                                 | 0.613    | 0.83 (0.54–1.27)                                 | 0.388    | 0.80 (0.56–1.15)                          | 0.227    |
| Type of work (ref. Unemployed)             |                                                  |          |                                                  |          |                                           |          |
| Casual                                     | 0.62 (0.42–0.91)                                 | 0.016    | 0.59 (0.31–1.14)                                 | 0.116    | 0.56 (0.33–0.95)                          | 0.032    |
| Self-employed                              | 0.64 (0.47–0.87)                                 | 0.005    | 0.65 (0.41–1.03)                                 | 0.068    | 0.66 (0.45–0.97)                          | 0.033    |
| Government/private                         | 0.61 (0.38–0.97)                                 | 0.038    | 0.77 (0.37–1.61)                                 | 0.488    | 0.63 (0.33–1.22)                          | 0.169    |
| Per capita household expenditure (ref. Q1) |                                                  |          |                                                  |          |                                           |          |
| Q2                                         | 1.11 (0.74–1.65)                                 | 0.619    | 1.40 (0.66–2.94)                                 | 0.379    | 1.54 (0.85–2.77)                          | 0.151    |
| Q3                                         | 1.46 (0.99–2.15)                                 | 0.058    | 1.74 (0.85–3.58)                                 | 0.130    | 1.67 (0.93–2.99)                          | 0.086    |
| Q4                                         | 2.01 (1.34–3.01)                                 | 0.001    | 2.58 (1.27–5.26)                                 | 0.009    | 2.42 (1.36–4.31)                          | 0.003    |
| Q5                                         | 3.27 (2.10–5.11)                                 | 0.000    | 4.64 (2.29–9.38)                                 | 0.000    | 4.71 (2.66–8.34)                          | 0.000    |
| Residency (ref. Rural)                     |                                                  |          |                                                  |          |                                           |          |
| Urban                                      | 0.99 (0.74–1.31)                                 | 0.936    | 0.85 (0.52–1.40)                                 | 0.526    | 0.88 (0.59–1.32)                          | 0.550    |
| Region (ref. Java-Bali)                    |                                                  |          |                                                  |          |                                           |          |
| Sumatra                                    | 0.82 (0.58–1.16)                                 | 0.257    | 0.78 (0.43–1.41)                                 | 0.411    | 1.12 (0.70–1.78)                          | 0.633    |
| Nusa Tenggara                              | 0.70 (0.37–1.35)                                 | 0.287    | 1.22 (0.39–3.77)                                 | 0.730    | 0.87 (0.33–2.29)                          | 0.772    |
| Kalimantan                                 | 0.86 (0.46–1.59)                                 | 0.632    | 0.77 (0.26–2.30)                                 | 0.637    | 0.96 (0.40–2.26)                          | 0.918    |
| Sulawesi                                   | 0.83 (0.43–1.61)                                 | 0.584    | 1.00 (0.36–2.79)                                 | 0.994    | 1.08 (0.44–2.63)                          | 0.864    |

<sup>a)</sup> Multilevel logistic regression model

Obesity (BMI  $\geq 25$  kg/m<sup>2</sup> as obese) is included in the clustering of multimorbidity

aOR: adjusted odds ratio, NCD: noncommunicable disease

**Table S10. Sensitivity analysis: the effect of multimorbidity on productivity loss**Obesity (BMI  $\geq 25$  kg/m<sup>2</sup> as obese) is included in the clustering of multimorbidity

| Variables                                  | Productivity loss                  |          |                                            |          |                                  |          |
|--------------------------------------------|------------------------------------|----------|--------------------------------------------|----------|----------------------------------|----------|
|                                            | Labour participation <sup>a)</sup> |          | Days primary activity missed <sup>b)</sup> |          | Days stayed in bed <sup>b)</sup> |          |
|                                            | aOR (95% CI)                       | p values | IRR (95% CI)                               | p values | IRR (95% CI)                     | p values |
| Number of NCDs (ref. no NCD)               |                                    |          |                                            |          |                                  |          |
| Single NCD                                 | 0.66 (0.54–0.82)                   | 0.000    | 1.16 (0.99–1.36)                           | 0.063    | 1.10 (0.82–1.48)                 | 0.533    |
| Two NCDs                                   | 0.45 (0.35–0.58)                   | 0.000    | 1.70 (1.41–2.04)                           | 0.000    | 1.37 (0.98–1.92)                 | 0.065    |
| Three or more NCDs                         | 0.37 (0.27–0.49)                   | 0.000    | 2.21 (1.76–2.76)                           | 0.000    | 2.16 (1.44–3.25)                 | 0.000    |
| Period (ref. 2007)                         |                                    |          |                                            |          |                                  |          |
| 2014                                       | 0.76 (0.65–0.89)                   | 0.001    | 1.54 (1.35–1.75)                           | 0.000    | 1.44 (1.13–1.85)                 | 0.004    |
| Sex (ref. Male)                            |                                    |          |                                            |          |                                  |          |
| Female                                     | 0.22 (0.17–0.27)                   | 0.000    | 0.96 (0.83–1.11)                           | 0.555    | 0.90 (0.68–1.20)                 | 0.480    |
| Age (ref. 50 – 60 years)                   |                                    |          |                                            |          |                                  |          |
| 61 – 70 years                              | 0.36 (0.29–0.44)                   | 0.000    | 1.02 (0.89–1.18)                           | 0.758    | 1.15 (0.87–1.52)                 | 0.336    |
| 71+ years                                  | 0.10 (0.08–0.13)                   | 0.000    | 1.17 (0.97–1.41)                           | 0.094    | 1.77 (1.24–2.52)                 | 0.002    |
| Marital status (ref. Not married)          |                                    |          |                                            |          |                                  |          |
| Currently married                          | 1.49 (1.22–1.82)                   | <0.0001  | 1.18 (1.01–1.37)                           | 0.032    | 0.96 (0.72–1.29)                 | 0.809    |
| Educational level (ref. No education)      |                                    |          |                                            |          |                                  |          |
| Primary                                    | 0.90 (0.72–1.13)                   | 0.372    | 0.92 (0.79–1.07)                           | 0.269    | 1.03 (0.77–1.38)                 | 0.851    |
| Junior high school                         | 0.41 (0.29–0.58)                   | <0.0001  | 0.91 (0.71–1.16)                           | 0.438    | 0.68 (0.42–1.10)                 | 0.118    |
| Senior high school                         | 0.43 (0.30–0.61)                   | <0.0001  | 0.64 (0.50–0.83)                           | 0.001    | 0.65 (0.40–1.04)                 | 0.073    |
| Tertiary                                   | 0.56 (0.34–0.92)                   | 0.021    | 0.52 (0.36–0.75)                           | <0.0001  | 0.42 (0.20–0.88)                 | 0.022    |
| Ethnicity (ref. Javanese)                  |                                    |          |                                            |          |                                  |          |
| Sundanese                                  | 0.48 (0.36–0.65)                   | <0.0001  | 1.39 (1.14–1.70)                           | 0.001    | 1.51 (1.03–2.21)                 | 0.035    |
| Others                                     | 0.80 (0.63–1.01)                   | 0.059    | 1.13 (0.97–1.33)                           | 0.123    | 1.13 (0.84–1.53)                 | 0.425    |
| Insurance coverage (ref. No)               |                                    |          |                                            |          |                                  |          |
| Yes                                        | 0.82 (0.69–0.98)                   | 0.032    | 1.13 (0.99–1.29)                           | 0.077    | 1.13 (0.88–1.46)                 | 0.329    |
| Type of work (ref. Unemployed)             |                                    |          |                                            |          |                                  |          |
| Casual                                     | N/A                                | N/A      | 0.69 (0.57–0.84)                           | <0.0001  | 0.41 (0.28–0.60)                 | <0.0001  |
| Self-employed                              | N/A                                | N/A      | 0.68 (0.58–0.79)                           | <0.0001  | 0.51 (0.38–0.69)                 | <0.0001  |
| Government/private                         | N/A                                | N/A      | 0.60 (0.47–0.76)                           | <0.0001  | 0.56 (0.35–0.90)                 | 0.017    |
| Per capita household expenditure (ref. Q1) |                                    |          |                                            |          |                                  |          |
| Q2                                         | 1.36 (1.06–1.75)                   | 0.016    | 1.03 (0.85–1.24)                           | 0.769    | 0.97 (0.68–1.38)                 | 0.848    |
| Q3                                         | 1.27 (0.98–1.64)                   | 0.071    | 1.17 (0.97–1.42)                           | 0.095    | 1.11 (0.78–1.59)                 | 0.557    |
| Q4                                         | 1.13 (0.86–1.47)                   | 0.383    | 1.05 (0.86–1.29)                           | 0.602    | 0.99 (0.68–1.43)                 | 0.944    |
| Q5                                         | 1.35 (1.01–1.80)                   | 0.043    | 1.26 (1.02–1.55)                           | 0.032    | 0.89 (0.60–1.33)                 | 0.577    |
| Residency (ref. Rural)                     |                                    |          |                                            |          |                                  |          |
| Urban                                      | 0.42 (0.34–0.52)                   | <0.0001  | 0.92 (0.80–1.06)                           | 0.239    | 0.69 (0.52–0.90)                 | 0.006    |
| Region (ref. Java-Bali)                    |                                    |          |                                            |          |                                  |          |
| Sumatra                                    | 0.91 (0.70–1.20)                   | 0.519    | 1.14 (0.95–1.38)                           | 0.162    | 1.10 (0.78–1.55)                 | 0.573    |
| Nusa Tenggara                              | 0.68 (0.44–1.04)                   | 0.077    | 0.86 (0.64–1.15)                           | 0.309    | 1.15 (0.66–2.00)                 | 0.629    |
| Kalimantan                                 | 1.22 (0.75–1.99)                   | 0.418    | 0.86 (0.63–1.17)                           | 0.329    | 0.92 (0.51–1.67)                 | 0.794    |
| Sulawesi                                   | 0.34 (0.21–0.55)                   | <0.0001  | 1.05 (0.76–1.46)                           | 0.754    | 1.07 (0.58–1.98)                 | 0.826    |

<sup>a)</sup> Multilevel logistic regression model<sup>b)</sup> Multilevel negative binomial regression model

aOR: adjusted odds ratio, IRR: incidence rate ratio, NCD: noncommunicable disease

## STROBE Statement

|                           | Item | Recommendation                                                                                                                                                                                                                                                                                                                                                                                                                                                                 | Reported on page | Relevant text from manuscript                                                                                                                                                         |
|---------------------------|------|--------------------------------------------------------------------------------------------------------------------------------------------------------------------------------------------------------------------------------------------------------------------------------------------------------------------------------------------------------------------------------------------------------------------------------------------------------------------------------|------------------|---------------------------------------------------------------------------------------------------------------------------------------------------------------------------------------|
| <b>Title and abstract</b> | 1    | (a) Indicate the study's design with a commonly used term in the title or the abstract                                                                                                                                                                                                                                                                                                                                                                                         | 1                | "Panel Data Analysis"                                                                                                                                                                 |
|                           |      | (b) Provide in the abstract an informative and balanced summary of what was done and what was found                                                                                                                                                                                                                                                                                                                                                                            | 2                | "Multimorbidity is associated with substantial direct and indirect costs to individuals, households, and the wider society."                                                          |
| <b>Introduction</b>       |      |                                                                                                                                                                                                                                                                                                                                                                                                                                                                                |                  |                                                                                                                                                                                       |
| Background d/rationale    | 2    | Explain the scientific background and rationale for the investigation being reported                                                                                                                                                                                                                                                                                                                                                                                           | 6                | "Evidence from high-income countries (HICs) has found that..."                                                                                                                        |
| Objectives                | 3    | State specific objectives, including any prespecified hypotheses                                                                                                                                                                                                                                                                                                                                                                                                               | 6                | "to examine NCD multimorbidity levels, and their relation to households' socioeconomic characteristics, health service use, catastrophic health expenditures, and productivity loss." |
| <b>Methods</b>            |      |                                                                                                                                                                                                                                                                                                                                                                                                                                                                                |                  |                                                                                                                                                                                       |
| Study design              | 4    | Present key elements of study design early in the paper                                                                                                                                                                                                                                                                                                                                                                                                                        | 7                | "We utilised panel data from two waves of the Indonesian Family Life Survey (IFLS)."                                                                                                  |
| Setting                   | 5    | Describe the setting, locations, and relevant dates, including periods of recruitment, exposure, follow-up, and data collection                                                                                                                                                                                                                                                                                                                                                | 7                | "Waves 5 was conducted between September 2014–March 2015."                                                                                                                            |
| Participants              | 6    | (a) <i>Cohort study</i> —Give the eligibility criteria, and the sources and methods of selection of participants. Describe methods of follow-up<br>(b) <i>Case-control study</i> —Give the eligibility criteria, and the sources and methods of case ascertainment and control selection. Give the rationale for the choice of cases and controls<br>(c) <i>Cross-sectional study</i> —Give the eligibility criteria, and the sources and methods of selection of participants | 7                | "This study included respondents aged 50 years and above in 2007 who participated in both Waves 4 and 5, and excluded those with missing values for the study variable."              |
| Variables                 | 7    | Clearly define all outcomes, exposures, predictors, potential confounders, and effect modifiers. Give diagnostic criteria, if applicable                                                                                                                                                                                                                                                                                                                                       | 7–8              | In "variables" subsection.                                                                                                                                                            |
| Data sources/ measurement | 8*   | For each variable of interest, give sources of data and details of methods of assessment (measurement). Describe comparability of assessment methods if there is more than one group                                                                                                                                                                                                                                                                                           | 7–8              | In "variables" subsection. Details of the measurements are available in Table S1                                                                                                      |

|                | Item                   | Recommendation                                                                                                                                                                                                                                                                                            | Reported on page       | Relevant text from manuscript                                                                                                                                                                                              |
|----------------|------------------------|-----------------------------------------------------------------------------------------------------------------------------------------------------------------------------------------------------------------------------------------------------------------------------------------------------------|------------------------|----------------------------------------------------------------------------------------------------------------------------------------------------------------------------------------------------------------------------|
|                | Bias                   | 9 Describe any efforts to address potential sources of bias                                                                                                                                                                                                                                               | 11                     | “Taking into account the hierarchical (nested) nature of the dataset (i.e. observations nested within individuals, and individuals nested within households, and districts), a multilevel level model approach was used.”  |
|                | Study size             | 10 Explain how the study size was arrived at                                                                                                                                                                                                                                                              | 7                      | Our final sample is 3,678 respondents (the sample flowchart is presented in Figure S1).                                                                                                                                    |
|                | Quantitative variables | 11 Explain how quantitative variables were handled in the analyses. If applicable, describe which groupings were chosen and why                                                                                                                                                                           | 7                      | In “variables” subsection, i.e. “A total of 10 NCDs were used to quantify the number of NCDs (0, 1, 2, 3 or more) and respondents with two or more NCDs were categorised as having multimorbidity (categorised as 0 or 1)” |
|                | Statistical methods    | 12 (a) Describe all statistical methods, including those used to control for confounding                                                                                                                                                                                                                  | 11                     | In “statistical analysis” subsection. For example “..., adjusting for covariates”                                                                                                                                          |
|                |                        | (b) Describe any methods used to examine subgroups and interactions                                                                                                                                                                                                                                       | 11                     | “We described the patterns of multimorbidity across different population subgroups...”                                                                                                                                     |
|                |                        | (c) Explain how missing data were addressed                                                                                                                                                                                                                                                               | 7                      | “...excluded those who did not participate in both Waves 4 and 5, and those with missing values for the study”                                                                                                             |
|                |                        | (d) <i>Cohort study</i> —If applicable, explain how loss to follow-up was addressed<br><i>Case-control study</i> —If applicable, explain how matching of cases and controls was addressed<br><i>Cross-sectional study</i> —If applicable, describe analytical methods taking account of sampling strategy | 11                     | “The results of the descriptive analysis were presented as numbers and weighted percentages with their 95% confidence interval (CI). ...”                                                                                  |
|                |                        | (e) Describe any sensitivity analyses                                                                                                                                                                                                                                                                     | 11                     | “We conducted two robustness analyses.”                                                                                                                                                                                    |
| <b>Results</b> |                        |                                                                                                                                                                                                                                                                                                           |                        |                                                                                                                                                                                                                            |
|                | Participants           | 13* (a) Report numbers of individuals at each stage of study—eg numbers potentially eligible, examined for eligibility, confirmed eligible, included in the study, completing follow-up, and analysed                                                                                                     | 1 (supplementary file) | Figure S1: Sampling flow chart                                                                                                                                                                                             |

|                   | <b>Item</b> | <b>Recommendation</b>                                                                                                                                                                                        | <b>Reported on page</b>   | <b>Relevant text from manuscript</b>                                                                                                                                                                            |
|-------------------|-------------|--------------------------------------------------------------------------------------------------------------------------------------------------------------------------------------------------------------|---------------------------|-----------------------------------------------------------------------------------------------------------------------------------------------------------------------------------------------------------------|
|                   |             | (b) Give reasons for non-participation at each stage                                                                                                                                                         | 1 (supplementary file)    | Figure S1: Sampling flow chart                                                                                                                                                                                  |
|                   |             | (c) Consider use of a flow diagram                                                                                                                                                                           | 1 (supplementary file)    | Figure S1: Sampling flow chart                                                                                                                                                                                  |
| Descriptive data  | 14*         | (a) Give characteristics of study participants (eg demographic, clinical, social) and information on exposures and potential confounders                                                                     | 1 (supplementary file)    | Figure S1: Sampling flow chart                                                                                                                                                                                  |
|                   |             | (b) Indicate number of participants with missing data for each variable of interest                                                                                                                          | 1 (supplementary file)    | Figure S1: Sampling flow chart                                                                                                                                                                                  |
|                   |             | (c) <i>Cohort study</i> —Summarise follow-up time (eg, average and total amount)                                                                                                                             |                           | N/A                                                                                                                                                                                                             |
| Outcome data      | 15*         | <i>Cohort study</i> —Report numbers of outcome events or summary measures over time                                                                                                                          |                           | N/A                                                                                                                                                                                                             |
|                   |             | <i>Case-control study</i> —Report numbers in each exposure category, or summary measures of exposure                                                                                                         |                           | N/A                                                                                                                                                                                                             |
|                   |             | <i>Cross-sectional study</i> —Report numbers of outcome events or summary measures                                                                                                                           | 25–26                     | Table 1 and Table 2                                                                                                                                                                                             |
| Main results      | 16          | (a) Give unadjusted estimates and, if applicable, confounder-adjusted estimates and their precision (eg, 95% confidence interval). Make clear which confounders were adjusted for and why they were included | 18–21                     | Table 2 – Table 5. For example, “Respondents with a single NCD were 1.61 times more likely (95% CI 1.21–2.14) to have experienced an outpatient visit in the past four weeks compared to those without an NCD.” |
|                   |             | (b) Report category boundaries when continuous variables were categorised                                                                                                                                    | 2 (supplementary file)    | Table S1: List of variables for 2007 and 2014 IFLS analyses                                                                                                                                                     |
|                   |             | (c) If relevant, consider translating estimates of relative risk into absolute risk for a meaningful time period                                                                                             |                           | N/A                                                                                                                                                                                                             |
| Other analyses    | 17          | Report other analyses done—eg analyses of subgroups and interactions, and sensitivity analyses                                                                                                               | 6–12 (supplementary file) | Tables S6–10. For example, “Our robustness analysis using cross-sectional analysis using 2014 cross-sectional dataset that consists of 14 physical NCDs (Tables S6–10) showed consistent results”               |
| <b>Discussion</b> |             |                                                                                                                                                                                                              |                           |                                                                                                                                                                                                                 |



|  | <b>Item</b>              | <b>Recommendation</b>                                                                                                                                                         | <b>Reported on page</b> | <b>Relevant text from manuscript</b>                                                                                                                                                      |
|--|--------------------------|-------------------------------------------------------------------------------------------------------------------------------------------------------------------------------|-------------------------|-------------------------------------------------------------------------------------------------------------------------------------------------------------------------------------------|
|  | Key results              | 18 Summarise key results with reference to study objectives                                                                                                                   | 15                      | “Multimorbidity was associated with significantly higher use of healthcare services, higher probability of catastrophic health expenditure, and a significant reduction in productivity.” |
|  | Limitations              | 19 Discuss limitations of the study, taking into account sources of potential bias or imprecision. Discuss both direction and magnitude of any potential bias                 | 18                      | “There are several limitations to our study.”                                                                                                                                             |
|  | Interpretation           | 20 Give a cautious overall interpretation of results considering objectives, limitations, multiplicity of analyses, results from similar studies, and other relevant evidence | 18                      | “Our findings should be interpreted with caution since the assessment of chronic diseases was mostly based on self-reporting”                                                             |
|  | Generalisability         | 21 Discuss the generalisability (external validity) of the study results                                                                                                      | 19                      | “This research intentionally focused on the older population due to a significantly higher burden of NCDs in this population group.”                                                      |
|  | <b>Other information</b> |                                                                                                                                                                               |                         |                                                                                                                                                                                           |
|  | Funding                  | 22 Give the source of funding and the role of the funders for the present study and, if applicable, for the original study on which the present article is based              | 20                      | Funding<br>This research received no specific grant from any funding agency in the public, commercial or not-for-profit sectors.                                                          |



# BMJ Open

## Impact of noncommunicable disease multimorbidity on health service use, catastrophic health expenditure, and productivity loss in Indonesia: a population-based panel data analysis study

|                                 |                                                                                                                                                                                                                                                                                                                                                                                                                                                                                                                                                                                                                                                                                                                                                                                                                                                                                                                                                                                                                                                                                                                                                                                                                                                                                                                                                                                                                                            |
|---------------------------------|--------------------------------------------------------------------------------------------------------------------------------------------------------------------------------------------------------------------------------------------------------------------------------------------------------------------------------------------------------------------------------------------------------------------------------------------------------------------------------------------------------------------------------------------------------------------------------------------------------------------------------------------------------------------------------------------------------------------------------------------------------------------------------------------------------------------------------------------------------------------------------------------------------------------------------------------------------------------------------------------------------------------------------------------------------------------------------------------------------------------------------------------------------------------------------------------------------------------------------------------------------------------------------------------------------------------------------------------------------------------------------------------------------------------------------------------|
| Journal:                        | <i>BMJ Open</i>                                                                                                                                                                                                                                                                                                                                                                                                                                                                                                                                                                                                                                                                                                                                                                                                                                                                                                                                                                                                                                                                                                                                                                                                                                                                                                                                                                                                                            |
| Manuscript ID                   | bmjopen-2020-041870.R2                                                                                                                                                                                                                                                                                                                                                                                                                                                                                                                                                                                                                                                                                                                                                                                                                                                                                                                                                                                                                                                                                                                                                                                                                                                                                                                                                                                                                     |
| Article Type:                   | Original research                                                                                                                                                                                                                                                                                                                                                                                                                                                                                                                                                                                                                                                                                                                                                                                                                                                                                                                                                                                                                                                                                                                                                                                                                                                                                                                                                                                                                          |
| Date Submitted by the Author:   | 21-Jan-2021                                                                                                                                                                                                                                                                                                                                                                                                                                                                                                                                                                                                                                                                                                                                                                                                                                                                                                                                                                                                                                                                                                                                                                                                                                                                                                                                                                                                                                |
| Complete List of Authors:       | <p>Marthias, Tiara; The University of Melbourne, Nossal Institute for Global Health; Gadjah Mada University, Department of Public Health, Faculty of Medicine, Public Health and Nursing</p> <p>Anindya, Kanya; The University of Melbourne, Nossal Institute for Global Health</p> <p>Ng, Nawi ; University of Gothenburg, Department of Public Health and Community Medicine</p> <p>McPake, Barbara; The University of Melbourne, Nossal Institute for Global Health</p> <p>Atun, Rifat; Harvard University T H Chan School of Public Health, Department of Global Health and Population</p> <p>Arfyanto, Hafiz ; SMERU Research Institute</p> <p>Hulse, Emily ; The University of Melbourne, Centre for Health Policy, School of Population and Global Health</p> <p>Zhao, Yang; The University of Melbourne, Nossal Institute for Global Health, The University of Melbourne; Peking University Health Science Centre, The George Institute for Global Health</p> <p>Jusril, Hafizah; Universitas Indonesia, Center for Health Research</p> <p>Pan, Tianxin; The University of Melbourne, Center for Health Policy, School of Population and Global Health</p> <p>Ishida, Marie; The University of Melbourne, Nossal Institute for Global Health</p> <p>Lee, John; The University of Melbourne, Nossal Institute for Global Health; Imperial College London, Department of Primary Care and Public Health, School of Public Health</p> |
| <b>Primary Subject Heading</b>: | Health policy                                                                                                                                                                                                                                                                                                                                                                                                                                                                                                                                                                                                                                                                                                                                                                                                                                                                                                                                                                                                                                                                                                                                                                                                                                                                                                                                                                                                                              |
| Secondary Subject Heading:      | Public health, Health policy, Health economics                                                                                                                                                                                                                                                                                                                                                                                                                                                                                                                                                                                                                                                                                                                                                                                                                                                                                                                                                                                                                                                                                                                                                                                                                                                                                                                                                                                             |
| Keywords:                       | PUBLIC HEALTH, Health policy < HEALTH SERVICES ADMINISTRATION & MANAGEMENT, Health economics < HEALTH SERVICES ADMINISTRATION & MANAGEMENT                                                                                                                                                                                                                                                                                                                                                                                                                                                                                                                                                                                                                                                                                                                                                                                                                                                                                                                                                                                                                                                                                                                                                                                                                                                                                                 |
|                                 |                                                                                                                                                                                                                                                                                                                                                                                                                                                                                                                                                                                                                                                                                                                                                                                                                                                                                                                                                                                                                                                                                                                                                                                                                                                                                                                                                                                                                                            |

1  
2  
3  
4  
5  
6  
7  
8  
9  
10  
11  
12  
13  
14  
15  
16  
17  
18  
19  
20  
21  
22  
23  
24  
25  
26  
27  
28  
29  
30  
31  
32  
33  
34  
35  
36  
37  
38  
39  
40  
41  
42  
43  
44  
45  
46  
47  
48  
49  
50  
51  
52  
53  
54  
55  
56  
57  
58  
59  
60





I, the Submitting Author has the right to grant and does grant on behalf of all authors of the Work (as defined in the below author licence), an exclusive licence and/or a non-exclusive licence for contributions from authors who are: i) UK Crown employees; ii) where BMJ has agreed a CC-BY licence shall apply, and/or iii) in accordance with the terms applicable for US Federal Government officers or employees acting as part of their official duties; on a worldwide, perpetual, irrevocable, royalty-free basis to BMJ Publishing Group Ltd ("BMJ") its licensees and where the relevant Journal is co-owned by BMJ to the co-owners of the Journal, to publish the Work in this journal and any other BMJ products and to exploit all rights, as set out in our [licence](#).

The Submitting Author accepts and understands that any supply made under these terms is made by BMJ to the Submitting Author unless you are acting as an employee on behalf of your employer or a postgraduate student of an affiliated institution which is paying any applicable article publishing charge ("APC") for Open Access articles. Where the Submitting Author wishes to make the Work available on an Open Access basis (and intends to pay the relevant APC), the terms of reuse of such Open Access shall be governed by a Creative Commons licence – details of these licences and which [Creative Commons](#) licence will apply to this Work are set out in our licence referred to above.

Other than as permitted in any relevant BMJ Author's Self Archiving Policies, I confirm this Work has not been accepted for publication elsewhere, is not being considered for publication elsewhere and does not duplicate material already published. I confirm all authors consent to publication of this Work and authorise the granting of this licence.

1  
2  
3  
4  
5  
6  
7  
8  
9  
10  
11  
12  
13  
14  
15  
16  
17  
18  
19  
20  
21  
22  
23  
24  
25  
26  
27  
28  
29  
30  
31  
32  
33  
34  
35  
36  
37  
38  
39  
40  
41  
42  
43  
44  
45  
46  
47  
48  
49  
50  
51  
52  
53  
54  
55  
56  
57  
58  
59  
60

1 **Impact of noncommunicable disease multimorbidity on health service**  
2 **use, catastrophic health expenditure, and productivity loss in**  
3 **Indonesia: a population-based panel data analysis study**

4  
5 Tiara Marthias<sup>†1,2</sup>, Kanya Anindya<sup>†\*1</sup>, Nawi Ng<sup>3</sup>, Barbara McPake<sup>1</sup>, Rifat Atun<sup>4</sup>, Hafiz  
6 Arfyanto<sup>5</sup>, Emily S G Hulse<sup>6</sup>, Yang Zhao<sup>1,7</sup>, Hafizah Jusril<sup>8</sup>, Tianxin Pan<sup>6</sup>, Marie  
7 Ishida<sup>1</sup>, John Tayu Lee<sup>1,9</sup>

8  
9 **Affiliations**

10 <sup>1</sup>Nossal Institute for Global Health, The University of Melbourne, Melbourne, Australia  
11 <sup>2</sup>Department of Public Health, Faculty of Medicine, Public Health and Nursing, Universitas Gadjah  
12 Mada, Yogyakarta, Indonesia <sup>3</sup>Department of Public Health and Community Medicine, University  
13 of Gothenburg, Sweden <sup>4</sup>Department of Global Health and Population, Harvard T.H. Chan School  
14 of Public Health, Harvard University, Boston, MA, USA <sup>5</sup>SMeRU Research Institute, Jakarta,  
15 Indonesia <sup>6</sup>Center for Health Policy, School of Population and Global Health, The University of  
16 Melbourne, Melbourne, Australia <sup>7</sup>The George Institute for Global Health, Peking University  
17 Health Science Center, Beijing, China <sup>8</sup>Center for Health Research, Faculty of Public Health,  
18 Universitas Indonesia, Depok, Indonesia <sup>9</sup>Department of Primary Care and Public Health, School  
19 of Public Health, Imperial College London, United Kingdom

20  
21 <sup>†</sup> Co-first author (both contributed equally)

22 <sup>\*</sup> Corresponding author

23 Postal address: The Nossal Institute for Global Health, level 5, 333 Exhibition Street,  
24 Melbourne, Victoria 3010 Australia.

25 E-mail address: kanindya@student.unimelb.edu.au

26 Telephone number: +62 878 9966 9201

27 **Word count:** 4014

1  
2  
3 29 **Abstract**  
4

5 30 **Objectives** To examine noncommunicable diseases (NCDs) multimorbidity level and  
6  
7  
8 31 its relation to households' socioeconomic characteristics, health service use,  
9  
10 32 catastrophic health expenditures, and productivity loss.  
11

12 33  
13  
14 34 **Design** This study utilised panel data of the Indonesian Family Life Survey (IFLS)  
15  
16  
17 35 conducted in 2007 (Wave 4) and 2014 (Wave 5).  
18

19 36  
20  
21 37 **Setting** The original sampling frame was based on 13 out of 27 provinces in 1993,  
22  
23  
24 38 representing 83% of the Indonesian population.  
25

26 39  
27  
28 40 **Participants** We included respondents aged 50 years and above in 2007, excluding  
29  
30  
31 41 those who did not participate in both Waves 4 and 5. The total number of participants  
32  
33 42 in this study are 3,678 respondents.  
34

35 43  
36  
37 44 **Primary outcome measures** We examined three main outcomes; health service use  
38  
39  
40 45 (outpatient and inpatient care), financial burden (catastrophic health expenditure), and  
41  
42 46 productivity loss (labour participation, days primary activity missed, days confined in  
43  
44  
45 47 bed). We applied multilevel mixed-effects regression models to assess the associations  
46  
47 48 between NCD multimorbidity and outcome variables,  
48

49 49  
50  
51 50 **Results** Women were more likely to have NCD multimorbidity than men and the  
52  
53  
54 51 prevalence of NCD multimorbidity increased with higher socioeconomic status. NCD  
55  
56 52 multimorbidity was associated with a higher number of outpatient visits (compared  
57  
58 53 with those without NCD, incidence rate ratio [IRR] 4.25, 95% CI 3.33–5.42 for  
59  
60

1  
2  
3 54 individuals with >3 NCDs) and inpatient visits (IRR 3.68, 95% CI 2.21–6.12 for  
4  
5 55 individuals with >3 NCDs). NCD multimorbidity was also associated with a greater  
6  
7 56 likelihood of experiencing catastrophic health expenditure (for >3 NCDs, adjusted odds  
8  
9 ratio [aOR] 1.69, 95% CI 1.02–2.81) and lower participation in the labour force (aOR  
10  
11 57  
12 58 0.23, 95% CI 0.16–0.33) compared with no NCD.

13  
14  
15 59

16  
17 60 **Conclusions** NCD multimorbidity is associated with substantial direct and indirect  
18  
19 61 costs to individuals, households, and the wider society. Our study highlights the  
20  
21 62 importance of preparing health systems for addressing the burden of multimorbidity in  
22  
23 63 LMICs.

24  
25  
26 64

27  
28 65 **Keywords** Multimorbidity, Indonesia, noncommunicable diseases, health service use,  
29  
30 66 catastrophic health expenditure, productivity loss.

### Strengths and limitations of this study

- To our knowledge, our study provides the first comprehensive analysis using the single largest longitudinal survey in Indonesia, which examined the impact of multimorbidity on health service use, catastrophic health expenditure, and productivity loss.
- This study applied multilevel mixed-effects regression models to examine factors associated with multimorbidity and its relationship to the outcome variables, while taking into account the hierarchical (nested) nature of the dataset.
- Our findings should be interpreted with caution since the assessment of NCDs was mostly based on self-reporting, which may not capture the true prevalence rate.
- Despite the fifth waves of IFLS dataset was conducted between 2014 and 2015, the longitudinal design of the survey is extremely useful for measuring the impact of chronic diseases, accounting for within-individual variations over-time.

67

### 68 Introduction

69 Noncommunicable diseases (NCDs) continue to be the leading cause of global burden  
70 of diseases, with 78% of NCD-related mortality concentrated in low-income and  
71 middle-income countries (LMICs).<sup>1</sup> The current COVID-19 pandemic highlights that  
72 the presence of NCDs can increase the fatality risk of a communicable disease.<sup>2</sup>  
73 Indonesia, the third most populous country among LMICs (after China and India) with  
74 a population of 273 million, has seen rapid demographic and epidemiological  
75 transitions over the last few decades. The threat of NCDs is expected to rise with the  
76 aging population (population aged 65 or above), which is projected to account for a  
77 quarter of the population by 2070.<sup>3</sup> Concurrently, the prevalence of NCD  
78 multimorbidity, defined as the presence of two or more NCDs, is expected to rise  
79 rapidly in many LMICs, as both life expectancy and exposure to risk factors increase.<sup>4</sup>  
80 Indonesia has started recognising the burden of NCDs due to its substantial contribution  
81 to the top causes of death and disability-adjusted life years (DALYs).<sup>5</sup> However, current  
82 Indonesia health programs remain limited to curative services, focusing on single

1  
2  
3 83 chronic disease as opposed to assessing and mitigating the impact of multimorbidity on  
4  
5 84 the individual, health system, and wider society.  
6  
7  
8 85

9  
10 86 COVID-19 pandemic emphasises the importance of health systems responsiveness to  
11  
12 87 multimorbidity. Historically, the growing burden of multimorbidity in LMICs was  
13  
14 88 highlighted in the United Nations High-Level Meetings on NCDs in 2011, 2014, and  
15  
16  
17 89 2018.<sup>6</sup> LMICs typically have low levels of government expenditure for health and  
18  
19 90 inadequate health insurance coverage, which often results in higher levels of out-of-  
20  
21 91 pocket expenditure (OOPE) and risk of impoverishing patients with chronic health  
22  
23 92 conditions.<sup>7,8</sup> The economic burden of multimorbidity is further compounded by the  
24  
25  
26 93 fact that multiple healthcare specialists typically manage multimorbid patients in  
27  
28 94 LMICs.<sup>9</sup> This leads to inefficiencies with numerous different hospital visits,  
29  
30 95 polypharmacy, and suboptimal disease management.<sup>9,10</sup>  
31  
32

33 96  
34  
35 97 While the Indonesian health system is mainly funded by the government, it only spends  
36  
37 98 around 2% of its GDP on health, which is significantly lower than other LMICs with  
38  
39 99 comparable income level.<sup>11</sup> Approximately half of all health spending is covered by the  
40  
41 100 public sector and one-third comes from OOP payment.<sup>12</sup> While the primary health care  
42  
43 101 (PHC) centres are designed as gatekeepers for primary prevention for NCDs, studies  
44  
45 102 have found limited capacity of PHC in proper management of NCDs.<sup>13–15</sup> There is also  
46  
47 103 high public funding allocations to curative services at the hospital-level,<sup>16</sup> with limited  
48  
49 104 investment in preventive and promotive health services.<sup>12</sup> Further, the poor and those  
50  
51 105 living in limited-resource regions have generally lower hospital utilisation due to  
52  
53  
54 106 geographical barriers and high transportation costs.<sup>17,18</sup> Low overall government health  
55  
56  
57  
58  
59  
60



1  
2  
3 107 spending, coupled with limited investment in PHC and the high burden of NCDs may  
4  
5 108 further increase the high OOPE in Indonesia and inequitable access to care.<sup>5</sup>  
6  
7  
8 109

9  
10 110 The Indonesian national health insurance program expansion in 2014 was designed to  
11  
12 111 achieve universal coverage by 2019.<sup>19</sup> However, as of August 2020, the insurance  
13  
14 112 coverage was only at 85.5%,<sup>20</sup> leaving around 40 million people remained uncovered.  
15  
16 113 Furthermore, the insurance program has been in funding deficit since its inception and  
17  
18 114 recent studies identified that it may not be financially sustainable.<sup>1,2</sup> Further, NCDs  
19  
20 115 were responsible for around 60% of total spending of the insurance program. Therefore,  
21  
22 116 addressing NCDs through preventive and promotive programs is pertinent to strengthen  
23  
24 117 the Indonesian health system and the sustainability of its health insurance program.  
25  
26 118

27  
28  
29  
30 119 Evidence from high-income countries (HICs) has found that apart from the negative  
31  
32 120 impact on health outcomes, multimorbidity imposes substantial economic costs on  
33  
34 121 individuals and households. This is because patients with multimorbidity incur large  
35  
36 122 medical expenditures and are more likely to be absent from work.<sup>8,21,22</sup> However, there  
37  
38 123 is no previous study in Indonesia that has examined the economic burden of NCD  
39  
40 124 multimorbidity, as earlier studies have focused on the burden of a single NCD.<sup>23</sup> Results  
41  
42 125 from this study may inform health systems reform across the region and be applicable  
43  
44 126 to similar LMICs. We present the first study that uses longitudinal data to examine  
45  
46 127 NCD multimorbidity levels, and their relationship to households' socioeconomic  
47  
48 128 characteristics, health service use, catastrophic health expenditures, and productivity  
49  
50 129 loss.  
51  
52  
53  
54  
55

56 130

57  
58 131  
59  
60

1  
2  
3 132 **Methods**

4  
5 133 **Sample and data**

6  
7  
8 134 We utilised panel data from two waves of the Indonesian Family Life Survey (IFLS)  
9  
10 135 conducted in 2007 (Wave 4) and 2014 (Wave 5). IFLS is an ongoing longitudinal  
11  
12 136 survey that started in 1993 with four subsequent rounds of data collection (1997/1998,  
13  
14 137 2000, 2007/2008, and 2014/2015). The original sample was based on 13 out of 27  
15  
16 138 provinces in 1993, representing 83% of the population. Wave 5 was conducted between  
17  
18 139 September 2014–March 2015, with 76% re-contact rate from the main respondents of  
19  
20 140 Wave 1. The dataset contains information at the individual- and household-level,  
21  
22 141 including sociodemographic characteristics, healthcare utilisation and expenditure, and  
23  
24 142 labour participation. The objectives and methods of the IFLS are detailed  
25  
26 143 elsewhere.<sup>24,25</sup> This study included respondents aged 50 years and above in 2007 who  
27  
28 144 participated in both Waves 4 and 5, and excluded those with missing values for the  
29  
30 145 study variable. Our final sample is 3,678 respondents and a sample flowchart is  
31  
32 146 presented in Figure S1.  
33  
34  
35  
36  
37

38 147 **Variables**

39  
40  
41 148 **Multimorbidity**

42  
43 149 Our main variable of interest was NCD multimorbidity. Fourteen types of NCDs were  
44  
45 150 included in Wave 5, but only 10 NCDs in Wave 4. For consistency, our main analysis  
46  
47 151 used 10 NCDs that were available in both waves, as the following: hypertension,  
48  
49 152 diabetes, asthma, heart attack/coronary heart diseases, liver disease, stroke, cancer,  
50  
51 153 arthritis/rheumatism, hypercholesterolemia, and depression/mental illness. The four  
52  
53 154 NCDs that were only included in Wave 5 were: prostate diseases, kidney diseases  
54  
55 155 (excluding malignancy), digestive diseases, and memory-related diseases.  
56  
57  
58  
59  
60

1  
2  
3 157 NCD status was either identified through self-reporting or physical examination. In the  
4  
5 158 self-report section, respondents who answered affirmatively to the question, “Has a  
6  
7 159 doctor/paramedic/nurse/midwife ever told you that you had any of these conditions?”,  
8  
9 160 were defined as reporting an NCD. For hypertension and hypercholesterolemia, the  
10  
11 161 diagnoses were confirmed through a physical examination conducted by trained nurses,  
12  
13 162 i.e. blood pressure and total cholesterol levels. All IFLS respondents aged 15 years and  
14  
15 163 older had their blood pressure recorded three times on alternate arms using Omron self-  
16  
17 164 inflating sphygmomanometers by trained nurses.<sup>24,25</sup> In our analysis, a respondent was  
18  
19 165 categorised as having hypertension if the mean measurement of systolic blood pressure  
20  
21 166 was 140 mm Hg and/or mean diastolic blood pressure was 90 mm Hg or the respondent  
22  
23 167 self-reported having been diagnosed with hypertension.<sup>26</sup> We also included  
24  
25 168 hypercholesterolemia, defined as total blood cholesterol value 240 mg/dl, as  
26  
27 169 morbidity.<sup>27</sup> It is important to note that different measurements of hypercholesterolemia  
28  
29 170 were used in Wave 4 and 5. Blood test for total cholesterol was performed in Wave 4  
30  
31 171 as opposed to self-reporting of hypercholesterolemia in Wave 5.  
32  
33  
34  
35  
36  
37  
38  
39  
40

41 173 A total of 10 NCDs were used to quantify the number of NCDs (0, 1, 2, 3 or more) and  
42  
43 174 respondents with two or more NCDs were categorised as having multimorbidity (0 or  
44  
45 175 1). Previous studies have typically considered hypertension, obesity, and  
46  
47 176 hypercholesterolemia as risk factors of NCDs and their inclusion in the multimorbidity  
48  
49 177 clustering remains inconsistent.<sup>23,28</sup> Therefore, in the sensitivity analysis, we included  
50  
51 178 obesity, defined as having BMI  $\geq 25$  kg/m<sup>2</sup>, in the clustering of multimorbidity.<sup>29</sup> All  
52  
53 179 statistical analyses were conducted using STATA 13.0.  
54  
55  
56  
57  
58  
59  
60

1  
2  
3 182 ***Outcome variables***  
4

5 183 The three main outcomes are: health service use and financial burden as the direct cost  
6  
7 184 and productivity loss as the indirect cost of multimorbidity. Respondents were asked  
8  
9 185 about the number of outpatient visits (in the last four weeks) and inpatient visits (in the  
10  
11 186 last 12 months) and OOPE. The data on OOPE was also collected with four weeks and  
12  
13 187 12 months recall period for outpatient and inpatient visits, respectively. We calculated  
14  
15 188 the total annual OOPE by multiplying OOPE for outpatient visits with 13 (as the  
16  
17 189 reference period of outpatient expenditure in the IFLS is four weeks and a year consists  
18  
19 190 of 52 weeks), and added OOPE for inpatient visits. The total OOPE reflects all costs  
20  
21 191 associated with outpatient or inpatient visits, including medication, medical  
22  
23 192 consultation, and laboratory tests.  
24  
25  
26  
27  
28  
29

30  
31 194 Catastrophic health expenditure occurs when OOPE exceeds certain thresholds of a  
32  
33 195 household's expenditure. The thresholds used in this study were 10% and 25% of total  
34  
35 196 household expenditure (as proposed by the Sustainable Development Goal 3 targets),  
36  
37 197 and the WHO's recommendation at 40% of household's capacity to pay. Capacity to  
38  
39 198 pay is defined as the household's ability to pay for other expenses, including medical  
40  
41 199 costs, after having household subsistence needs met.<sup>30</sup> Household subsistence needs are  
42  
43 200 proxied by the household non-food expenditure variable. Catastrophic health  
44  
45 201 expenditure ( $cata_h$ ) occurrence is expressed as follows:  
46  
47  
48

49  
50 202 
$$cata_h = 1 \text{ if } \frac{HS_h}{THE_h} \text{ or } \frac{HS_h}{CTP_h} > z, \text{ and otherwise is zero.}$$
  
51

52  
53 203 Where  $HS_h$  is the total OOPE for health,  $THE_h$  is the total household expenditure,  $CTP_h$   
54  
55 204 is capacity to pay, and  $z$  is the threshold of capacity to pay. In using the proportion of  
56  
57 205 total OOPE for health to total household expenditure (THE), the threshold  $z$  was set at  
58  
59 206 10% and 25%. Further, in using the proportion of OOPE for health to capacity to pay

1  
2  
3 207 (CTP), the threshold  $z$  was set at 40%. All monetary values were adjusted for inflation  
4  
5 208 and converted to 2014 International Dollars.<sup>31</sup>  
6  
7  
8 209

9  
10 210 Productivity loss was assessed based on: (1) labour participation; (2) the number of  
11  
12 211 days of primary activity missed due to poor health; and (3) number of days confined to  
13  
14 212 bed. Labour participation status was defined as the respondent's employment status at  
15  
16 213 the time of the survey. The number of days of primary daily activity missed and days  
17  
18 214 confined to bed were included in the health conditions section of the survey, with a four  
19  
20 215 week recall period.  
21  
22  
23  
24 216

### 25 26 217 ***Covariates***

27  
28 218 Sociodemographic factors included were: sex, age groups (50-60, 61-70, above 70  
29  
30 219 years), marital status (currently and not currently married), education (no education,  
31  
32 220 primary, junior high school, senior high school, tertiary), ethnicity (Javanese,  
33  
34 221 Sundanese, others), coverage of health insurance (no, yes), type of work (unemployed,  
35  
36 222 casual, self-employed, government/private), and respondents' economic status (per  
37  
38 223 capita expenditure for consumption). The economic status was categorised into  
39  
40 224 quintiles: q1 (lowest) to q5 (highest). We also included residency (rural, urban), region  
41  
42 225 of residency (Java-Bali, Sumatra, Nusa Tenggara, Kalimantan, Sulawesi), and period  
43  
44 226 (using wave 2007 as the reference group) as covariates. Detailed definitions and  
45  
46 227 categorisations are available in Table S1. It should be noted that IFLS did not include  
47  
48 228 the eastern regions which are considered to be underdeveloped.  
49  
50  
51  
52  
53  
54 229

## 230 **Statistical analysis**

231 We described the patterns of multimorbidity across different population subgroups and  
232 presented the weighted percentages with 95% confidence interval (CI). Taking into  
233 account the hierarchical (nested) nature of the dataset (i.e. observations nested within  
234 individuals, and individuals nested within households, and districts),<sup>32</sup> a multilevel  
235 level model approach was used to examine factors associated with multimorbidity and  
236 its relation to the outcome variables. Multilevel negative binomial regression models  
237 were performed to examine the association between multimorbidity and the numbers  
238 of outpatient visits and days in the hospital. We used negative binomial models instead  
239 of Poisson models due to the over-dispersion of the count data variable. We applied  
240 multilevel logistic regression models to observe binary outcome variables and  
241 calculated the intra-class correlation coefficients (ICC). The multilevel analyses were  
242 conducted using unweighted data, since rather than deriving nationally representative  
243 estimates, our aim was on testing the association between multimorbidity and the  
244 outcomes and examine the mixed effects.<sup>33</sup> We conducted a robustness check to  
245 investigate the association between multimorbidity and costs using the 2014 cross-  
246 sectional dataset, that contains information for four additional NCDs than the 2007  
247 IFLS.

## 248 **Patient and public involvement**

249 Neither patients nor the public were involved in this secondary data analysis.

250

## 251 **Results**

### 252 **Descriptive statistics**

253 Table 1 and Table S2 presents the respondents' characteristics by multimorbidity status  
254 in 2007 and 2014. The median age in 2007 was 58 years (IQR 54–65), 53.9% were

1  
2  
3 255 female, 74.4% were married, 16.5% had at least secondary education level or above  
4  
5 256 and only 25.5% had health insurance coverage. In 2014, the median age was 65 years  
6  
7 257 (IQR 60–72), and health insurance coverage increased to 42.8%.  
8  
9

10 258

11  
12 259 A similar prevalence of NCD multimorbidity was observed between 2007 (21.0%, 95%  
13  
14 260 CI 19.6–22.6) and 2014 (22.0%, 95% CI 20.6–23.6). The prevalence of multimorbidity  
15  
16 261 increased with rising socioeconomic status. For example, in 2014, the prevalence  
17  
18 262 increased from 18.0% (95% CI 16.9–20.7) to 41.2% (95% CI 31.6–51.6) between  
19  
20 263 respondents with no education and those with tertiary education. Similarly, the  
21  
22 264 prevalence increased from 13.5% (95% CI 11.1–16.2) to 36.2% (95% CI 32.2–40.5)  
23  
24 265 between the lowest and highest wealth quintiles. The trend of increasing multimorbidity  
25  
26 266 was observed for all age groups, shown in Figure 1, where the fifth and fourth wealth  
27  
28 267 quintiles had a higher prevalence of NCD multimorbidity than the lower quintiles. The  
29  
30 268 prevalence of multimorbidity by level of education is available in Figure S2.  
31  
32

33 269

34  
35  
36  
37 270 The regression results show that NCD multimorbidity was more likely among those  
38  
39 271 with higher socioeconomic status (Table 1). Respondents in the highest wealth quintile  
40  
41 272 were more likely to report NCD multimorbidity, compared with those in the lowest  
42  
43 273 quintile (aOR 2.22, 95% CI 1.72–2.86). Compared with those with lower educational  
44  
45 274 attainment, respondents with higher educational attainment were more likely to  
46  
47 275 experience NCD multimorbidity (aOR 1.54, 95% CI 1.01–2.34 for tertiary level  
48  
49 276 completed). Additionally, the prevalence of multimorbidity was higher in females than  
50  
51 277 males (aOR 1.74, 95% CI 1.46–2.08) and those living in urban areas (aOR 1.41, 95%  
52  
53 278 CI 1.19–1.67). The ICC shows that above 53% ( $1 - [0.34 + 0.13]$ ) of the variance can be  
54  
55 279 ascribed to between-individual level differences (Table S3).  
56  
57  
58  
59  
60

## 280 **Multimorbidity and health service use**

281 The probability of using outpatient and inpatient care and the number of visits increased  
282 with more NCD diagnoses (Table 2, Table 3). Respondents with a single NCD were  
283 1.35 times more likely (95% CI 1.15–1.58) to have experienced an outpatient visit in  
284 the past four weeks compared with those without an NCD. The odds of an outpatient  
285 visit increased to 4.66 times (95% CI 3.55–6.11), while the incidence rate increased by  
286 4.25 times (95% CI 3.33–5.42) in those with three or more NCDs. Furthermore, the  
287 incidence of inpatient visits was 3.68 times (95% CI 2.21–6.12) higher in those with  
288 three or more NCDs, compared with those without an NCD.

289  
290 We reported the results of ICC in Table S3. We found that 14% and 11% of the variance  
291 in the outpatient visit were attributable to the differences within-individuals and  
292 households, respectively. Between-individual variation accounted for the largest  
293 variation, where it explained 75% (1-[0.14+0.11]) and 65% (1-[0.25+0.12]) of  
294 outpatient and inpatient visit, respectively. No influence of district-level variables was  
295 found (ICC=0).

## 297 **Multimorbidity and financial burden**

298 Table 2 presents the mean OOPE based on 2014 IFLS. The mean OOPE for outpatient  
299 care incurred by respondents during the last four weeks increased from INT\$17 in those  
300 without any NCDs to INT\$60 in those with three or more NCDs in 2014. Similarly, for  
301 inpatient visits, having three or more NCDs resulted in a higher mean OOPE of \$762  
302 (SD ±\$1,421) compared with \$566 (SD ±\$1,880) for those without any NCDs. The  
303 total annual OOPE also increased from \$295 (SD ±\$977), among those without any  
304 NCDs, to \$968 (SD ±\$4,313) among those with three or more NCDs. Table 2 also



1  
2  
3 305 presents the proportion of respondents with catastrophic health expenditure using  
4  
5 306 different thresholds. The results using 10% and 25% of THE, and 40% of non-food  
6  
7 307 consumption thresholds found that households with more than two NCDs had a higher  
8  
9 308 proportion of catastrophic health expenditure compared with households without any  
10  
11 309 member having any NCDs.  
12  
13  
14

15 310

16  
17 311 Table 4 presents the logistic regression results for the proportion of respondents who  
18  
19 312 experienced catastrophic health expenditure using different thresholds. At 10% of THE  
20  
21 313 as the threshold, having two NCDs increases the odds of catastrophic health  
22  
23 314 expenditure to 1.58 times (95% CI 1.06–2.35), compared with having no NCD. These  
24  
25 315 odds increased to 1.69 times for those having three NCDs or more (95% CI 1.02–2.81).  
26  
27 316 At 25% and 40% thresholds, we found no significant association between the number  
28  
29 317 of NCD and the incidence of catastrophic health expenditure.  
30  
31  
32

33 318

### 34 319 **Multimorbidity and productivity loss**

35  
36  
37 320 More NCDs diagnoses were associated with greater productivity loss (Table 2, Table  
38  
39 321 5). For example, among those aged 50–60 years old, only 49.8% (95% CI 36.7–62.9)  
40  
41 322 of respondents with three or more NCDs were employed, compared with 84.3% (95%  
42  
43 323 CI 79.8–88.0) of respondents without NCD (Table 2). The mean number of days of  
44  
45 324 primary daily activity missed increased from 2.7 days (SD  $\pm$ 6.0), for those without any  
46  
47 325 NCDs, to 10.1 days (SD  $\pm$ 12.1) for those with three or more NCDs. The mean number  
48  
49 326 of days confined to bed also increased among those with three or more NCDs.  
50  
51  
52

53 327

54  
55  
56  
57 328 Individuals diagnosed with three or more NCDs were 0.23 times less likely (95% CI  
58  
59 329 0.16–0.33) to be employed compared with those without NCD (Table 5). Compared

1  
2  
3 330 with those without NCD, being diagnosed with three or more NCDs were expected to  
4  
5 331 have a higher incidence rate of missing days of primary activity (IRR 2.59, 95% CI  
6  
7 332 1.97–3.41) as well as days confined in bed (IRR 2.64, 95% CI 1.60–4.36). We found  
8  
9 333 that 48% of the variance in labour participation was due to within-individual variations,  
10  
11 334 while between-individual variation accounted for 23% (1-[0.48+0.28+0.01]) (Table  
12  
13 335 S3).

336

### 337 **Robustness check**

338 Our robustness analysis using 2014 cross-sectional dataset that consists of 14 physical  
339 NCDs (Table S4–7) showed consistent results with our original findings. Higher  
340 household expenditure and higher education were associated with a greater burden of  
341 multimorbidity. Multimorbidity was also associated with higher health care use, higher  
342 incidence of catastrophic health expenditures, and lower productivity. The association  
343 between multimorbidity and catastrophic health expenditure was more pronounced in  
344 the cross-sectional analysis. Our inclusion of obesity in the clustering of multimorbidity  
345 also yields consistent results (Table S8–10).

346

### 347 **Discussion**

348 Our study provides the first comprehensive analysis of multimorbidity in Indonesia  
349 using the only large panel dataset in Indonesia. Our study reveals that almost one in  
350 four of our study population has at least two NCDs, with 6.5% having three or more in  
351 2014. Our findings show a higher prevalence of multimorbidity in wealthier population  
352 groups. Multimorbidity was associated with a higher use of healthcare services, higher  
353 probability of catastrophic health expenditure, and a reduction in productivity.

1  
2  
3 354  
4  
5

6 355 Analyses of socioeconomic gradients of NCDs in HICs routinely find negative  
7  
8 356 socioeconomic gradients. However, this is not the case for LMICs, which have a more  
9  
10 357 mixed pattern of the distribution of risk factors.<sup>34,35</sup> Other studies find a similar pattern  
11  
12 358 with diabetes and cardiovascular diseases in LMICs undergoing epidemiological  
13  
14 359 transition.<sup>35</sup> These conditions predominate in high-income quintiles in early stages of  
15  
16 360 transition, which may explain our findings on the higher prevalence of NCD  
17  
18 361 multimorbidity among more affluent population. We also found that obesity was more  
19  
20 362 prevalent in wealthier quintiles. As obesity is associated with several NCDs  
21  
22 363 (cardiovascular diseases, hypertension, stroke, cancer, arthritis and  
23  
24 364 hypercholesterolemia),<sup>36</sup> this may explain our findings on socioeconomic gradients of  
25  
26 365 NCDs. Further, our results on socioeconomic patterning of multimorbidity can be  
27  
28 366 explained by the fact that higher-income and higher-educational groups have better  
29  
30 367 health literacy and access to healthcare services and thus, are more likely to have NCDs  
31  
32 368 diagnosed than lower socio-income groups.  
33  
34  
35  
36  
37  
38  
39

40 370 Our findings showing the association between having more NCDs and greater use of  
41  
42 371 health services are in line with earlier studies from both HICs and LMICs.<sup>9,28,37</sup> The  
43  
44 372 presence of NCD multimorbidity was also associated with a greater financial burden,  
45  
46 373 which is mainly driven by higher healthcare use. These findings are consistent with  
47  
48 374 earlier studies.<sup>10,28,37,38</sup> Based on a previous Indonesian study, four NCDs  
49  
50 375 (hypertension, diabetes, heart problems, and stroke) are the leading causes of mortality  
51  
52 376 and were estimated to account for 12% of Indonesia's OOPE in 2020.<sup>22</sup> Furthermore,  
53  
54 377 the impoverishment effect of multimorbidity has been previously documented and is  
55  
56 378 confirmed in our study.<sup>7,21,22,37</sup>  
57  
58  
59  
60

1  
2  
3 379  
4

5 380 This study contributes to the growing evidence that multimorbidity has a substantial  
6  
7 381 impact on disability and productivity.<sup>7,9,22</sup> Interventions that can help effectively  
8  
9 382 prevent and manage multimorbidity have the potential for generating substantial returns  
10  
11 383 on improved health, work productivity and social benefits. However, a large portion of  
12  
13 384 the Indonesia government health expenditure is still geared towards curative care.<sup>5</sup>  
14  
15 385 Renewing the focus on health promotion and NCD prevention requires a strong PHC  
16  
17 386 system.<sup>9</sup> PHC is the entry point of a sustainable health system for the early detection of  
18  
19 387 risk factors and initiation of a treatment-seeking pathway for patients with NCDs, and  
20  
21 388 thus, plays a crucial role for NCD prevention and provision of long-term integrated  
22  
23 389 care. Such policies would be in line with the current program of the Ministry of Health  
24  
25 390 in Indonesia to reorient public PHC to provide more promotive and preventive health  
26  
27 391 services, such as through the implementation of Chronic Diseases Management  
28  
29 392 Program (Prolanis) in PHC.<sup>12,39</sup> However, the participation in this program remains low  
30  
31 393 due to the poor access to PHC facilities, especially in non-Java-Bali regions. Engaging  
32  
33 394 the private sector, which makes up 60% of health facilities in Indonesia, is warranted  
34  
35 395 to expand the coverage of NCDs promotive and prevention activities.<sup>40</sup> Furthermore,  
36  
37 396 the development of digital health solution and telehealth for NCDs prevention and  
38  
39 397 control should be included in the national plan.<sup>41</sup>  
40  
41  
42  
43  
44  
45  
46  
47  
48  
49

398

50 399 Although most countries and international health organisations have recognised the  
51  
52 400 importance of multimorbidity,<sup>42</sup> most health policies and programs still focus on single  
53  
54 401 diseases, including in Indonesia. Therefore, the health systems need to shift from  
55  
56 402 single-disease models to new financing methods and service delivery to more  
57  
58 403 effectively manage multimorbidity.<sup>43,44</sup> At the primary health care level, this can be  
59  
60

1  
2  
3 404 done through improved prevention and treatment of multimorbidity, underpinned by  
4  
5 405 multidisciplinary teams led by general practitioners.<sup>42</sup> There is also a need to strengthen  
6  
7 406 the coordination of patient management between primary and secondary care. Similar  
8  
9 407 to many LMICs and neighbouring countries in Asia, healthcare delivery in Indonesia  
10  
11 408 remains fragmented and hospital-centred, with little coordination among healthcare  
12  
13 409 providers across different tiers of the system.<sup>45</sup>  
14  
15  
16

17 410

18  
19 411 Furthermore, under the current national health insurance scheme, the hospital  
20  
21 412 reimbursement system that uses case-based groups has created significant gaps between  
22  
23 413 reimbursable costs and actual hospital expenses.<sup>46</sup> The reimbursement system, which  
24  
25 414 is mainly based on primary diagnosis, limits the hospital's capacity and willingness to  
26  
27 415 treat complicated cases such as those with multimorbidity.<sup>47</sup> Thus, while clinical  
28  
29 416 guideline for single NCD still has a prominent role, it also important for LMICs to  
30  
31 417 develop a clinical guideline for multimorbidity, along with payment systems that would  
32  
33 418 ensure quality health services at both primary and secondary levels of care for patients  
34  
35 419 with multimorbidity.<sup>9,40</sup> It is also worth noting that Indonesia is still facing the double  
36  
37 420 burden of infectious and chronic diseases. Therefore, multimorbidity care delivery  
38  
39 421 model needs to pay attention to the management of NCDs alongside infectious diseases.  
40  
41  
42  
43  
44  
45  
46  
47

48 422

49 423 There are several limitations to our study. First, the IFLS-5 was conducted between  
50  
51 424 2014 and 2015, which may not be able to capture the current prevalence of  
52  
53 425 multimorbidity in Indonesia. Despite this limitation, IFLS is the only longitudinal  
54  
55 426 survey available in Indonesia that is useful to produce more accurate estimates  
56  
57 427 compared with using a cross-sectional dataset (e.g. the National Socioeconomic  
58  
59 428 Survey). Second, our findings should be interpreted with caution since the assessment  
60

1  
2  
3 429 of NCDs was mostly based on self-reporting. This may cause misreporting of the true  
4  
5 430 diagnoses and prevalence of multimorbidity. The health service use and OOPE were  
6  
7 431 also based on self-reporting and may be prone to recall bias.<sup>48</sup> The use of self-reported  
8  
9 432 diagnoses limits our assessment of the actual severity of the diseases, which may vary  
10  
11 433 across socioeconomic status. Future studies should consider using different datasets  
12  
13 434 (such as clinical dataset from the hospital) and applying clinical metrics such as  
14  
15 435 Charlson index, which could more objectively capture disease severity and predict the  
16  
17 436 health outcomes.<sup>49</sup> Third, the IFLS sample did not include eastern Indonesia. There is  
18  
19 437 a need to extend the multimorbidity assessment to the remaining regions. Finally, this  
20  
21 438 research intentionally focused on the older population due to a significantly higher  
22  
23 439 burden of NCDs in this population group. Future research should use cohort data to  
24  
25 440 follow patients over a more extended time period to examine the impact of  
26  
27 441 multimorbidity and its effects in younger population groups in LMICs.<sup>22</sup>  
28  
29  
30  
31  
32  
33  
34

### 35 443 **Conclusion**

36  
37 444 Multimorbidity poses substantial costs to individuals, households, health system, and  
38  
39 445 the wider society in Indonesia, which has an increasingly aging population.  
40  
41 446 Policymakers and employers in Indonesia should carefully design and invest in targeted  
42  
43 447 public health and workplace interventions at the individual and population level to avert  
44  
45 448 the adverse health and economic consequences of NCD multimorbidity.  
46  
47  
48  
49  
50  
51  
52  
53  
54  
55  
56  
57  
58  
59  
60

1  
2  
3 450 **Declarations**

4  
5 451 **Abbreviation**

6  
7 452 CHE: Catastrophic health expenditure; HICs: High-income countries; IFLS: Indonesian Family Life  
8  
9 453 Survey; LMICs: Low-middle income countries; NCDs: Noncommunicable diseases; OOPE: Out-  
10  
11 454 of-pocket expenditure; PHC: Primary health care.

12  
13 455 **Competing interests**

14  
15 456 The authors have declared that no competing interests exist.

16  
17 457 **Ethics approval**

18  
19 458 The IFLS has been approved by ethics review boards at RAND Corporation and Gadjah Mada  
20  
21 459 University in Indonesia. Written informed consent was sought from all respondents prior to data  
22  
23 460 collection. As this study used IFLS publicly available datasets that contain no personal identification  
24  
25 461 of the respondents, no further ethical approval was sought.

26  
27 462 **Author's contributions**

28  
29 463 Author's contributions: The aim of the research was developed by TM, KA, JL. The methodology  
30  
31 464 development and analysis were conducted by TM, KA, HA, TP, JL. EH assisted in drafting the  
32  
33 465 discussion section and proofread all section. YZ, HJ, MI contributed to background and discussion  
34  
35 466 section. NN, BM, RA, JL provided critical input in revising the manuscript. All authors reviewed,  
36  
37 467 edited and commented on multiple versions of the manuscript.

38  
39 468 **Availability of data and materials**

40  
41 469 The datasets are publicly accessible after registration ([https://www.rand.org/well-being/social-and-](https://www.rand.org/well-being/social-and-behavioral-policy/data/FLS/IFLS/access.html)  
42  
43 470 [behavioral-policy/data/FLS/IFLS/access.html](https://www.rand.org/well-being/social-and-behavioral-policy/data/FLS/IFLS/access.html)).

44  
45 471 **Acknowledgements**

46  
47 472 The authors of the paper express sincere gratitude to the RAND for providing access to the data.  
48  
49 473 We acknowledge Nur Arna Sucianti from SurveyMeter, for guiding us with data merging.

50  
51 474 **Funding**

52  
53 475 This research received no specific grant from any funding agency in the public, commercial or not-  
54  
55 476 for-profit sectors.



477 **References**

- 478 1 World Health Organization. Noncommunicable diseases country profiles 2018.  
479 World Health Organization, 2018 <https://apps.who.int/iris/handle/10665/274512>.  
480 (accessed Oct 10, 2019).
- 481 2 Zhang L, Sun W, Wang Y, *et al*. Clinical Course and Mortality of Stroke Patients  
482 With Coronavirus Disease 2019 in Wuhan, China. *Stroke* 2020; **51**: 2674–82.
- 483 3 United Nations, Department of Economic and Social Affairs, Population Division.  
484 World Population Prospects 2019, Online Edition. Rev. 1. 2019. UN DESA, 2019  
485 <https://population.un.org/wpp/Download/Standard/Population/> (accessed March 8,  
486 2020).
- 487 4 Hussain MA, Huxley RR, Al Mamun A. Multimorbidity prevalence and pattern in  
488 Indonesian adults: an exploratory study using national survey data. *BMJ open* 2015;  
489 **5**: e009810.
- 490 5 Mboi N, Surbakti IM, Trihandini I, *et al*. On the road to universal health care in  
491 Indonesia, 1990–2016: a systematic analysis for the Global Burden of Disease Study  
492 2016. *The Lancet* 2018; **392**: 581–91.
- 493 6 United Nations. Political declaration of the third high-level meeting of the General  
494 Assembly on the prevention and control of non-communicable diseases. United  
495 Nations, 2018 [https://www.un.org/en/ga/search/view\\_doc.asp?symbol=A/RES/73/2](https://www.un.org/en/ga/search/view_doc.asp?symbol=A/RES/73/2)  
496 (accessed March 8, 2020).
- 497 7 Sum G, Hone T, Atun R, *et al*. Multimorbidity and out-of-pocket expenditure on  
498 medicines: a systematic review. *BMJ global health* 2018; **3**: e000505.
- 499 8 Wang L, Si L, Cocker F, Palmer AJ, Sanderson K. A systematic review of cost-of-  
500 illness studies of multimorbidity. *Applied health economics and health policy* 2018;  
501 **16**: 15–29.
- 502 9 Barnett K, Mercer SW, Norbury M, Watt G, Wyke S, Guthrie B. Epidemiology of  
503 multimorbidity and implications for health care, research, and medical education: a  
504 cross-sectional study. *The Lancet* 2012; **380**: 37–43.
- 505 10 Salisbury C. Multimorbidity: redesigning health care for people who use it. *The*  
506 *Lancet* 2012; **380**: 7–9.
- 507 11 World Bank Group. Indonesia Health Financing System Assessment : Spend More,  
508 Right and Better. Washington, DC: World Bank, 2016  
509 <https://openknowledge.worldbank.org/handle/10986/25363> (accessed Sept 24,  
510 2020).
- 511 12 Gani A, Budiharsana M. The consolidated report on Indonesia health sector review  
512 2018. Jakarta, Indonesia: Bappenas, 2018.
- 513 13 Werdhani RA. Medical problem in Asia pacific and ways to solve it: The roles of  
514 primary care/family physician (Indonesia Xperience). *J Family Med Prim Care*  
515 2019; **8**: 1523–7.



- 1  
2  
3 516 14Rokx C. New insights into the provision of health services in Indonesia: A health  
4 517 workforce study. World Bank Publications, 2010  
5 518 <http://documents1.worldbank.org/curated/en/799111468038325818/pdf/538830PUB>  
6 519 [0Heal101Official0Use0Only1.pdf](http://documents1.worldbank.org/curated/en/799111468038325818/pdf/538830PUB).  
7  
8  
9 520 15Rajan VS, Patil A, Pambudi ES, Junedi B. Is Indonesia Ready to Serve? : An  
10 521 analysis of Indonesia's primary health care supply-side readiness. Washington,  
11 522 D.C. : World Bank Group: World Bank, 2018  
12 523 <http://documents.worldbank.org/curated/en/484351538653658243/Is-Indonesia->  
13 524 [Ready-to-Serve-An-Analysis-of-Indonesia-s-Primary-Health-Care-Supply-Side-](http://documents.worldbank.org/curated/en/484351538653658243/Is-Indonesia-)  
14 525 [Readiness](http://documents.worldbank.org/curated/en/484351538653658243/Is-Indonesia-) (accessed March 20, 2019).  
15  
16 526 16Mahendradhata Y, Trisnantoro L, Dewi S, *et al*. The Republic of Indonesia Health  
17 527 System Review. India: World Health Organization, 2017  
18 528 <https://apps.who.int/iris/handle/10665/254716>.  
19  
20  
21 529 17Alatas V, Banerjee A, Hanna R, Olken BA, Tobias J. Targeting the Poor: Evidence  
22 530 from a Field Experiment in Indonesia. *American Economic Review* 2012; **102**:  
23 531 1206–40.  
24  
25 532 18Noerdin E. Transport, health services and budget allocation to address maternal  
26 533 mortality in rural Indonesia. *Transport and Communications Bulletin for Asia and*  
27 534 *the Pacific* 2014; **84**: 1–14.  
28  
29 535 19Agustina R, Dartanto T, Sitompul R, *et al*. Universal health coverage in Indonesia:  
30 536 concept, progress, and challenges. *The Lancet* 2018.  
31  
32 537 20BPJS Kesehatan. JKN coverage. 2020. <https://bpjs-kesehatan.go.id/bpjs/> (accessed  
33 538 Oct 1, 2020).  
34  
35 539 21Jaspers L, Colpani V, Chaker L, *et al*. The global impact of non-communicable  
36 540 diseases on households and impoverishment: a systematic review. *European Journal*  
37 541 *of Epidemiology* 2015; **30**: 163–88.  
38  
39 542 22Lee JT, Hamid F, Pati S, Atun R, Millett C. Impact of noncommunicable disease  
40 543 multimorbidity on healthcare utilisation and out-of-pocket expenditures in middle-  
41 544 income countries: cross sectional analysis. *PLoS One* 2015; **10**: e0127199.  
42  
43 545 23Finkelstein EA, Chay J, Bajpai S. The economic burden of self-reported and  
44 546 undiagnosed cardiovascular diseases and diabetes on Indonesian households. *PloS*  
45 547 *one* 2014; **9**: e99572.  
46  
47 548 24Strauss J, Witoelar F, Sikoki B. The Fifth Wave of the Indonesia Family Life  
48 549 Survey: Overview and Field Report: Volume 1. RAND Corporation, 2016  
49 550 DOI:10.7249/WR1143.1.  
50  
51 551 25Strauss J, Witoelar F, Sikoki B, Wattie A. The fourth wave of the Indonesian  
52 552 Family Life Survey (IFLS4): Overview and field report. RAND, 2009.  
53  
54 553 26Chobanian AV, Bakris GL, Black HR, *et al*. The seventh report of the joint  
55 554 national committee on prevention, detection, evaluation, and treatment of high blood  
56 555 pressure: the JNC 7 report. *Jama* 2003; **289**: 2560–71.  
57  
58  
59  
60

- 1  
2  
3 556 27 Grundy SM, Cleeman JI, Merz CNB, *et al.* Implications of recent clinical trials for  
4 557 the national cholesterol education program adult treatment panel III guidelines.  
5 558 *Journal of the American College of Cardiology* 2004; **44**: 720–32.
- 6  
7  
8 559 28 Hussain MA, Huxley RR, Al Mamun A. Multimorbidity prevalence and pattern in  
9 560 Indonesian adults: an exploratory study using national survey data. *BMJ open* 2015;  
10 561 **5**: e009810.
- 11  
12 562 29 World Health Organization. The Asia-Pacific perspective: redefining obesity and  
13 563 its treatment. 2000.
- 14  
15 564 30 Xu K, Evans DB, Kawabata K, Zeramdini R, Klavus J, Murray CJ. Household  
16 565 catastrophic health expenditure: a multicountry analysis. *The Lancet* 2003; **362**:  
17 566 111–7.
- 18  
19  
20 567 31 Organisation for Economic Co-operation and Development (OECD). Purchasing  
21 568 power parities (PPP). OECD, 2019 <https://data.oecd.org/conversion/purchasing536>  
22 569 [power-parities-ppp.htm](https://data.oecd.org/conversion/purchasing536) (accessed Sept 10, 2019).
- 23  
24 570 32 Vaezghasemi M, Ng N, Eriksson M, Subramanian S. Households, the omitted level  
25 571 in contextual analysis: disentangling the relative influence of households and  
26 572 districts on the variation of BMI about two decades in Indonesia. *International*  
27 573 *journal for equity in health* 2016; **15**: 102.
- 28  
29  
30 574 33 Lee ES, Forthofer RN. Analyzing complex survey data. Sage, 2006.
- 31  
32 575 34 Hosseinpoor AR, Bergen N, Kunst A, *et al.* Socioeconomic inequalities in risk  
33 576 factors for non communicable diseases in low-income and middle-income countries:  
34 577 results from the World Health Survey. *BMC public Health* 2012; **12**: 912.
- 35  
36 578 35 Manne-Goehler J, Atun R, Stokes A, *et al.* Diabetes diagnosis and care in sub-  
37 579 Saharan Africa: pooled analysis of individual data from 12 countries. *The lancet*  
38 580 *Diabetes & endocrinology* 2016; **4**: 903–12.
- 39  
40  
41 581 36 Field AE, Coakley EH, Must A, *et al.* Impact of overweight on the risk of  
42 582 developing common chronic diseases during a 10-year period. *Archives of internal*  
43 583 *medicine* 2001; **161**: 1581–6.
- 44  
45 584 37 Wang HH, Wang JJ, Wong SY, *et al.* Epidemiology of multimorbidity in China  
46 585 and implications for the healthcare system: cross-sectional survey among 162,464  
47 586 community household residents in southern China. *BMC medicine* 2014; **12**: 188.
- 48  
49  
50 587 38 Mondor L, Maxwell CJ, Hogan DB, *et al.* Multimorbidity and healthcare  
51 588 utilization among home care clients with dementia in Ontario, Canada: a  
52 589 retrospective analysis of a population-based cohort. *PLoS medicine* 2017; **14**:  
53 590 e1002249.
- 54  
55 591 39 Deonisia A. Kemenkes akan memperkuat fungsi preventif dan promotif melalui  
56 592 akreditasi Puskesmas. Kompas.id. 2019; published online Oct 28.  
57 593 <https://kompas.id/baca/utama/2019/10/28/kemenkes-akan-memperkuat-fungsi->  
58 594 [preventif-dan-promotif-melalui-akreditasi-puskesmas/](https://kompas.id/baca/utama/2019/10/28/kemenkes-akan-memperkuat-fungsi-) (accessed Sept 10, 2020).
- 59  
60

- 1  
2  
3 595 40Hoffmann T, Jansen J, Glasziou P. The importance and challenges of shared  
4 596 decision making in older people with multimorbidity. *PLoS medicine* 2018; **15**:  
5 597 e1002530.
- 6  
7 598 41 World Health Organization. Preliminary results: Rapid assessment of service  
8 599 delivery for NCDs during the COVID-19 pandemic. World Health Organization,  
9 600 2020 [https://www.who.int/publications/m/item/rapid-assessment-of-service-](https://www.who.int/publications/m/item/rapid-assessment-of-service-delivery-for-ncds-during-the-covid-19-pandemic)  
10 601 [delivery-for-ncds-during-the-covid-19-pandemic](https://www.who.int/publications/m/item/rapid-assessment-of-service-delivery-for-ncds-during-the-covid-19-pandemic) (accessed Sept 10, 2020).
- 11  
12 602 42 World Health Organization. Multimorbidity: Technical Series on Safer Primary  
13 603 Care. Geneva, 2016.
- 14  
15 604 43 Kernick D, Chew-Graham CA, O’Flynn N. Clinical assessment and management  
16 605 of multimorbidity: NICE guideline. *Br J Gen Pract* 2017; **67**: 235–6.
- 17  
18 606 44 Chandraratne NK, Pathirathna K, Harrison C, Siriwardena AN. A comparison of  
19 607 policies and guidelines related to multimorbidity in the UK, Australia and Sri Lanka.  
20 608 *Australian journal of general practice* 2018; **47**: 15–9.
- 21  
22 609 45 Wang X, Sun X, Birch S, *et al.* People-centred integrated care in urban China. *Bull*  
23 610 *World Health Organ* 2018; **96**: 843–52.
- 24  
25 611 46 Satibi S, Andayani TM, Endarti D, Suwantara IPT, Wintariani NP, Agustini NPD.  
26 612 Comparison of Real Cost Versus the Indonesian Case Base Groups (INA-CBGs)  
27 613 Tariff Rates Among Patients of High-Incidence Cancers Under the National Health  
28 614 Insurance Scheme. *Asian Pacific journal of cancer prevention: APJCP* 2019; **20**:  
29 615 117.
- 30  
31 616 47 Schröders J, Wall S, Hakimi M, *et al.* How is Indonesia coping with its epidemic of  
32 617 chronic noncommunicable diseases? A systematic review with meta-analysis. *PloS*  
33 618 *one* 2017; **12**.
- 34  
35 619 48 Vellakkal S, Subramanian S, Millett C, Basu S, Stuckler D, Ebrahim S.  
36 620 Socioeconomic inequalities in non-communicable diseases prevalence in India:  
37 621 disparities between self-reported diagnoses and standardized measures. *PloS one*  
38 622 2013; **8**: e68219.
- 39  
40 623 49 D’Hoore W, Bouckaert A, Tilquin C. Practical considerations on the use of the  
41 624 Charlson comorbidity index with administrative data bases. *Journal of clinical*  
42 625 *epidemiology* 1996; **49**: 1429–33.
- 43  
44 626
- 45  
46  
47  
48  
49  
50  
51  
52  
53  
54  
55  
56  
57  
58  
59  
60

627 **Figure captions**628 **Figure 1. Prevalence of multimorbidity by age group and per capita household**  
629 **expenditure**

630

631 <sup>a)</sup> respondents who reported that they had 2 or more chronic conditions related to noncommunicable  
632 diseases (NCDs). <sup>b)</sup> Pooled sample of Wave 4 and Wave 5. Q1-Q5 refer to household expenditure  
633 quintiles, where Q1 is the lowest and Q5 the highest household expenditure quintile.  
634635 **Tables**636 **Table 1. Sample characteristics and factors associated with multimorbidity**

| Characteristics                  | 2007         |                           | 2014         |                           | Factors associated with multimorbidity |         |
|----------------------------------|--------------|---------------------------|--------------|---------------------------|----------------------------------------|---------|
|                                  | Total n (%)  | Multimorbidity % (95% CI) | Total n (%)  | Multimorbidity % (95% CI) | aOR (95% CI)                           | p value |
| Overall                          | 3678 (100%)  | 21.0 (19.6–22.6)          | 3678 (100%)  | 22.0 (20.6–23.6)          |                                        |         |
| Sex                              |              |                           |              |                           |                                        |         |
| Male                             | 1664 (46.1%) | 14.1 (12.3–16.1)          | 1663 (46.0%) | 19.4 (17.3–21.6)          | 1                                      |         |
| Female                           | 2014 (53.9%) | 26.9 (24.8–29.2)          | 2015 (54.0%) | 24.3 (22.3–26.4)          | 1.74 (1.46–2.08)                       | <0.0001 |
| Age                              |              |                           |              |                           |                                        |         |
| 50 – 60 years                    | 2210 (59.8%) | 19.9 (18.1–21.8)          | 966 (25.6%)  | 23.5 (20.7–26.7)          | 1                                      |         |
| 61 – 70 years                    | 1069 (29.9%) | 21.9 (19.2–24.8)          | 1562 (42.9%) | 21.6 (19.4–23.9)          | 1.10 (0.93–1.31)                       | 0.257   |
| 71+ years                        | 399 (10.3%)  | 25.2 (20.6–30.4)          | 1150 (31.4%) | 21.4 (18.8–24.2)          | 1.09 (0.87–1.38)                       | 0.444   |
| Marital status                   |              |                           |              |                           |                                        |         |
| Not currently married            | 927 (25.6%)  | 26.1 (23.0–29.4)          | 1338 (36.3%) | 23.3 (20.9–25.9)          | 1                                      |         |
| Currently married                | 2751 (74.4%) | 19.3 (17.7–21.1)          | 2340 (63.7%) | 21.3 (19.5–23.2)          | 1.03 (0.86–1.24)                       | 0.742   |
| Educational level                |              |                           |              |                           |                                        |         |
| No education                     | 2049 (58.7%) | 20.4 (18.5–22.5)          | 2098 (60.6%) | 18.0 (16.2–19.8)          | 1                                      |         |
| Primary                          | 903 (24.8%)  | 19.7 (17.0–22.7)          | 862 (23.0%)  | 24.0 (20.9–27.3)          | 1.19 (0.98–1.44)                       | 0.081   |
| Junior high school               | 273 (6.4%)   | 25.9 (20.5–32.3)          | 271 (6.3%)   | 36.3 (30.2–43.0)          | 1.50 (1.12–2.02)                       | 0.007   |
| Senior high school               | 324 (7.2%)   | 20.5 (15.8–25.9)          | 307 (7.0%)   | 29.5 (24.1–35.5)          | 0.96 (0.71–1.29)                       | 0.778   |
| Tertiary                         | 129 (2.9%)   | 34.4 (25.2–44.8)          | 140 (3.1%)   | 41.2 (31.6–51.6)          | 1.54 (1.01–2.34)                       | 0.043   |
| Ethnicity                        |              |                           |              |                           |                                        |         |
| Javanese                         | 1684 (51.8%) | 19.4 (17.4–21.5)          | 1781 (55.8%) | 19.7 (17.8–21.8)          | 1                                      |         |
| Sundanese                        | 424 (15.9%)  | 29.1 (24.8–33.9)          | 438 (16.3%)  | 27.3 (23.1–31.8)          | 1.38 (1.08–1.77)                       | 0.010   |
| Others                           | 1570 (32.3%) | 19.6 (17.4–22.0)          | 1459 (27.9%) | 23.6 (21.2–26.2)          | 1.10 (0.90–1.33)                       | 0.355   |
| Insurance coverage               |              |                           |              |                           |                                        |         |
| No                               | 2652 (74.5%) | 20.3 (18.6–22.1)          | 1950 (57.2%) | 18.7 (16.9–20.7)          | 1                                      |         |
| Yes                              | 1026 (25.5%) | 23.2 (20.4–26.4)          | 1720 (42.8%) | 26.4 (24.2–28.9)          | 1.18 (1.01–1.39)                       | 0.035   |
| Type of work                     |              |                           |              |                           |                                        |         |
| Unemployed                       | 951 (24.7%)  | 31.4 (28.1–34.9)          | 1483 (38.9%) | 29.9 (27.4–32.6)          | 1                                      |         |
| Casual                           | 674 (19.1%)  | 16.9 (13.9–20.4)          | 562 (14.1%)  | 13.8 (10.7–17.6)          | 0.47 (0.37–0.60)                       | <0.0001 |
| Self-employed                    | 1630 (45.2%) | 16.8 (14.9–18.9)          | 1464 (40.1%) | 17.4 (15.4–19.7)          | 0.61 (0.51–0.73)                       | <0.0001 |
| Government/private               | 423 (10.9%)  | 22.2 (18.0–27.1)          | 269 (7.0%)   | 21.0 (15.8–27.4)          | 0.60 (0.45–0.79)                       | <0.0001 |
| Per capita Household expenditure |              |                           |              |                           |                                        |         |
| Q1 (the lowest)                  | 728 (22.9%)  | 15.8 (13.0–18.9)          | 813 (25.2%)  | 13.5 (11.1–16.2)          | 1                                      |         |
| Q2                               | 785 (22.4%)  | 17.9 (15.1–21.2)          | 746 (21.4%)  | 18.9 (15.9–22.3)          | 1.28 (1.01–1.62)                       | 0.040   |
| Q3                               | 743 (20.1%)  | 20.5 (17.4–24.0)          | 757 (20.4%)  | 22.1 (18.9–25.7)          | 1.37 (1.08–1.74)                       | 0.009   |
| Q4                               | 744 (18.4%)  | 23.6 (20.3–27.3)          | 681 (17.2%)  | 25.3 (21.9–29.0)          | 1.84 (1.44–2.33)                       | <0.0001 |
| Q5 (the highest)                 | 678 (16.1%)  | 30.4 (26.5–34.7)          | 681 (15.8%)  | 36.2 (32.2–40.5)          | 2.22 (1.72–2.86)                       | <0.0001 |
| Residency                        |              |                           |              |                           |                                        |         |
| Rural                            | 1958 (63.4%) | 18.1 (16.3–20.1)          | 1682 (52.8%) | 16.9 (15.1–19.0)          | 1                                      |         |
| Urban                            | 1720 (36.6%) | 26.1 (23.8–28.6)          | 1996 (47.1%) | 27.7 (25.5–30.0)          | 1.41 (1.19–1.67)                       | <0.0001 |
| Region                           |              |                           |              |                           |                                        |         |
| Java-Bali                        | 2413 (77.5%) | 21.6 (19.9–23.5)          | 2417 (77.6%) | 21.1 (19.3–22.9)          | 1                                      |         |
| Sumatra                          | 691 (14.5%)  | 19.6 (16.7–22.8)          | 690 (14.5%)  | 26.6 (23.3–30.2)          | 1.06 (0.85–1.33)                       | 0.602   |
| Nusa Tenggara                    | 239 (2.4%)   | 14.5 (10.6–19.5)          | 239 (2.4%)   | 14.5 (10.5–19.6)          | 0.59 (0.40–0.87)                       | 0.008   |
| Kalimantan                       | 168 (1.8%)   | 17.9 (12.7–24.5)          | 168 (1.7%)   | 34.2 (27.4–41.7)          | 1.35 (0.92–1.98)                       | 0.129   |
| Sulawesi                         | 167 (3.8%)   | 19.6 (14.1–26.6)          | 164 (3.7%)   | 23.7 (17.6–31.0)          | 0.89 (0.59–1.34)                       | 0.569   |

637 <sup>a)</sup> Values are unweighted counts and weighted percentages unless otherwise indicated638 <sup>b)</sup> We defined multimorbidity if the respondents reported that they had 2 or more chronic conditions related to  
639 NCDs. Chronic diseases included: hypertension, diabetes, asthma, heart attack/coronary heart diseases, liver  
640 disease, stroke, cancer, arthritis/rheumatism, hypercholesterolemia, and mental illness.641 <sup>c)</sup> Adjusted odds ratio (aOR) was estimated using multilevel logistic regression model of 2007 and 2014 IFLS  
642 NCD: noncommunicable disease

637 **Table 2. Descriptive summary of health service use-financial burden and**  
 638 **productivity outcomes by the number of NCDs (2014 IFLS)**  
 639

|                                                      | No NCD            | 1 NCD             | 2 NCDs            | +3 NCDs           |
|------------------------------------------------------|-------------------|-------------------|-------------------|-------------------|
|                                                      | Mean (SD)         | Mean (SD)         | Mean (SD)         | Mean (SD)         |
| Overall (n, %)                                       | 1052 (100%)       | 1751 (100%)       | 627 (100%)        | 248 (100%)        |
| <b>Health service use</b>                            |                   |                   |                   |                   |
| <i>Outpatient services</i> <sup>a)</sup>             |                   |                   |                   |                   |
| Any visit (%; 95% CI)                                | 15.5% (13.3–17.9) | 21.7% (19.5–23.9) | 35.7% (31.7–40.0) | 55.9% (49.0–62.6) |
| Number of visits (mean, SD)                          | 0.24 ± 0.72       | 0.41 ± 1.1        | 0.78 ± 1.6        | 1.4 ± 2.1         |
| <i>Inpatient services</i> <sup>b)</sup>              |                   |                   |                   |                   |
| Any visit (%; 95% CI)                                | 3.3% (2.3–4.8)    | 4.6% (3.5–6.0)    | 8.3% (6.1–11.0)   | 20.8% (15.7–27.0) |
| Number of visits (mean, SD)                          | 0.04 ± 0.30       | 0.06 ± 0.31       | 0.14 ± 0.65       | 0.35 ± 0.96       |
| <b>Financial burden</b>                              |                   |                   |                   |                   |
| OOPE for outpatient care (mean, SD) <sup>a,c)</sup>  | \$17 ± 47         | \$17 ± 58         | \$15 ± 40         | \$60 ± 321        |
| OOPE for inpatient care (mean, SD) <sup>b,c)</sup>   | \$566 ± 1,880     | \$527 ± 2,115     | \$792 ± 1,706     | \$762 ± 1,421     |
| Annual Total OOPE (mean, SD)                         | \$295 ± 977       | \$292 ± 1,239     | \$336 ± 950       | \$968 ± 4,313     |
| <i>Catastrophic health expenditure (%; 95% CI)</i>   |                   |                   |                   |                   |
| >10% of total household expenditure                  | 5.0% (3.7–6.6)    | 6.9% (5.6–8.5)    | 10.3% (7.9–13.4)  | 12.5% (8.7–17.7)  |
| >25% of total household expenditure                  | 1.5% (0.6–2.5)    | 1.5% (0.9–2.3)    | 2.8% (1.6–4.8)    | 2.8% (1.3–6.3)    |
| >40% of total non-food expenditure                   | 1.8% (1.1–2.8)    | 2.7% (1.9–3.6)    | 4.0% (2.6–6.2)    | 3.6% (1.8–6.8)    |
| <b>Productivity loss</b>                             |                   |                   |                   |                   |
| <i>Labour participation (%; 95% CI)</i>              |                   |                   |                   |                   |
| 50-60 years <sup>d)</sup>                            | 84.3% (79.8–88.0) | 74.3% (69.3–78.8) | 72.3% (64.3–79.1) | 49.8% (36.7–62.9) |
| 61-70 years <sup>d)</sup>                            | 78.3% (74.0–82.1) | 65.2% (61.1–69.1) | 54.3% (47.1–61.3) | 42.8% (32.6–53.8) |
| 71+ years <sup>d)</sup>                              | 51.4% (44.7–58.1) | 45.0% (40.5–49.5) | 28.4% (21.6–36.3) | 17.3% (8.1–33.4)  |
| Number of days of primary activity missed (mean, SD) | 2.7 ± 6.0         | 3.6 ± 6.8         | 6.5 ± 9.8         | 10.1 ± 12.1       |
| Number of days lying in bed (mean, SD)               | 0.80 ± 3.4        | 0.99 ± 3.6        | 1.9 ± 6.0         | 2.4 ± 6.3         |

a) in the last four weeks

b) in the last 12 months

c) Out-of-pocket expenditure (OOPE) were only asked to those who utilised outpatient and/or inpatient services.

d) The percentages were calculated based on the total number of respondents by aged groups. Total respondents aged 50-60 years, 61-70 years and 71+ years are 966, 1592, and 1150 respondents.

OOPE medical expenses were converted to 2014 International Dollars (INT\$).

Bootstrapping with 400 times replications was performed to estimate the standard error and 95% CI.

640

641 **Table 3. The effect of multimorbidity on health service use**

| Variables                                  | Health service use      |              |                                |              |                         |              |                                |         |
|--------------------------------------------|-------------------------|--------------|--------------------------------|--------------|-------------------------|--------------|--------------------------------|---------|
|                                            | Outpatient              |              |                                |              | Inpatient               |              |                                |         |
|                                            | Any visit <sup>a)</sup> |              | Number of visits <sup>b)</sup> |              | Any visit <sup>a)</sup> |              | Number of visits <sup>b)</sup> |         |
| aOR (95% CI)                               | p values                | IRR (95% CI) | p values                       | aOR (95% CI) | p values                | IRR (95% CI) | p values                       |         |
| Number of NCDs (ref. no NCD)               |                         |              |                                |              |                         |              |                                |         |
| Single NCD                                 | 1.35 (1.15–1.58)        | <0.0001      | 1.45 (1.24–1.69)               | <0.0001      | 1.07 (0.78–1.48)        | 0.671        | 1.06 (0.75–1.50)               | 0.755   |
| Two NCDs                                   | 2.43 (2.00–2.95)        | <0.0001      | 2.45 (2.04–2.93)               | <0.0001      | 1.78 (1.23–2.57)        | 0.002        | 2.07 (1.39–3.08)               | <0.0001 |
| Three or more NCDs                         | 4.66 (3.55–6.11)        | <0.0001      | 4.25 (3.33–5.42)               | <0.0001      | 3.69 (2.35–5.79)        | <0.0001      | 3.68 (2.21–6.12)               | <0.0001 |
| Period (ref. 2007)                         |                         |              |                                |              |                         |              |                                |         |
| 2014                                       | 1.40 (1.22–1.61)        | <0.0001      | 1.46 (1.29–1.65)               | <0.0001      | 1.79 (1.36–2.36)        | <0.0001      | 2.20 (1.63–2.98)               | <0.0001 |
| Sex (ref. Male)                            |                         |              |                                |              |                         |              |                                |         |
| Female                                     | 1.26 (1.08–1.47)        | 0.003        | 1.20 (1.04–1.39)               | 0.013        | 0.93 (0.70–1.24)        | 0.626        | 0.85 (0.62–1.16)               | 0.300   |
| Age (ref. 50 – 60 years)                   |                         |              |                                |              |                         |              |                                |         |
| 61 – 70 years                              | 1.01 (0.86–1.18)        | 0.905        | 1.00 (0.87–1.16)               | 0.969        | 1.07 (0.78–1.45)        | 0.677        | 1.17 (0.84–1.65)               | 0.351   |
| 71+ years                                  | 1.10 (0.90–1.34)        | 0.351        | 1.06 (0.88–1.27)               | 0.567        | 1.49 (1.03–2.15)        | 0.034        | 1.66 (1.11–2.49)               | 0.014   |
| Marital status (ref. Not married)          |                         |              |                                |              |                         |              |                                |         |
| Currently married                          | 1.14 (0.97–1.34)        | 0.105        | 1.15 (0.99–1.34)               | 0.069        | 1.04 (0.77–1.40)        | 0.815        | 0.98 (0.71–1.37)               | 0.914   |
| Educational level (ref. No education)      |                         |              |                                |              |                         |              |                                |         |
| Primary                                    | 1.06 (0.90–1.25)        | 0.496        | 0.96 (0.82–1.13)               | 0.629        | 1.09 (0.80–1.50)        | 0.578        | 0.97 (0.69–1.38)               | 0.882   |
| Junior high school                         | 1.04 (0.80–1.35)        | 0.786        | 1.00 (0.78–1.28)               | 0.993        | 1.23 (0.78–1.95)        | 9,400.36     | 1.48 (0.90–2.42)               | 0.120   |
| Senior high school                         | 1.05 (0.81–1.36)        | 0.706        | 0.91 (0.71–1.17)               | 0.473        | 0.91 (0.57–1.46)        | 0.699        | 0.82 (0.49–1.37)               | 0.448   |
| Tertiary                                   | 1.29 (0.90–1.84)        | 0.167        | 0.93 (0.66–1.32)               | 0.697        | 0.98 (0.53–1.80)        | 0.937        | 0.85 (0.42–1.69)               | 0.640   |
| Ethnicity (ref. Javanese)                  |                         |              |                                |              |                         |              |                                |         |
| Sundanese                                  | 0.92 (0.74–1.14)        | 0.464        | 0.95 (0.77–1.16)               | 0.617        | 0.90 (0.61–1.34)        | 0.609        | 1.14 (0.75–1.76)               | 0.536   |
| Others                                     | 1.06 (0.89–1.25)        | 0.525        | 0.99 (0.84–1.16)               | 0.877        | 0.90 (0.65–1.23)        | 0.495        | 1.08 (0.76–1.52)               | 0.676   |
| Insurance coverage (ref. No)               |                         |              |                                |              |                         |              |                                |         |
| Yes                                        | 1.48 (1.28–1.70)        | <0.0001      | 1.51 (1.32–1.72)               | <0.0001      | 1.90 (1.45–2.50)        | <0.0001      | 1.65 (1.23–2.21)               | 0.001   |
| Type of work (ref. Unemployed)             |                         |              |                                |              |                         |              |                                |         |
| Casual                                     | 0.76 (0.62–0.95)        | 0.014        | 0.69 (0.57–0.85)               | <0.0001      | 0.49 (0.31–0.78)        | 0.003        | 0.44 (0.27–0.73)               | 0.001   |
| Self-employed                              | 0.85 (0.73–1.00)        | 0.056        | 0.82 (0.70–0.95)               | 0.008        | 0.60 (0.44–0.82)        | 0.001        | 0.60 (0.43–0.83)               | 0.002   |
| Government/private                         | 0.75 (0.58–0.96)        | 0.025        | 0.72 (0.57–0.92)               | 0.008        | 0.63 (0.39–1.04)        | 0.071        | 0.77 (0.46–1.31)               | 0.335   |
| Per capita household expenditure (ref. Q1) |                         |              |                                |              |                         |              |                                |         |
| Q2                                         | 1.50 (1.21–1.86)        | <0.0001      | 1.50 (1.23–1.84)               | <0.0001      | 1.25 (0.81–1.92)        | 0.307        | 1.07 (0.67–1.70)               | 0.777   |
| Q3                                         | 1.76 (1.42–2.18)        | <0.0001      | 1.74 (1.42–2.13)               | <0.0001      | 1.64 (1.08–2.49)        | 0.020        | 1.71 (1.10–2.66)               | 0.018   |
| Q4                                         | 1.73 (1.38–2.15)        | <0.0001      | 1.80 (1.46–2.21)               | <0.0001      | 1.42 (0.91–2.20)        | 0.121        | 1.36 (0.86–2.18)               | 0.192   |
| Q5                                         | 1.90 (1.51–2.40)        | <0.0001      | 2.09 (1.68–2.59)               | <0.0001      | 2.48 (1.60–3.85)        | <0.0001      | 2.52 (1.59–4.00)               | <0.0001 |
| Residency (ref. Rural)                     |                         |              |                                |              |                         |              |                                |         |
| Urban                                      | 0.92 (0.80–1.07)        | 0.283        | 0.95 (0.83–1.10)               | 0.500        | 0.96 (0.72–1.26)        | 0.744        | 1.05 (0.78–1.42)               | 0.726   |
| Region (ref. Java-Bali)                    |                         |              |                                |              |                         |              |                                |         |
| Sumatra                                    | 0.83 (0.68–1.00)        | 0.052        | 0.98 (0.81–1.17)               | 0.798        | 1.23 (0.87–1.74)        | 0.236        | 1.25 (0.86–1.82)               | 0.250   |
| Nusa Tenggara                              | 0.64 (0.46–0.89)        | 0.007        | 0.60 (0.43–0.82)               | 0.002        | 1.25 (0.71–2.18)        | 0.437        | 1.11 (0.60–2.03)               | 0.745   |
| Kalimantan                                 | 1.03 (0.74–1.43)        | 0.873        | 1.21 (0.89–1.65)               | 0.228        | 1.09 (0.58–2.05)        | 0.799        | 0.94 (0.47–1.89)               | 0.865   |
| Sulawesi                                   | 0.64 (0.45–0.93)        | 0.019        | 0.63 (0.44–0.90)               | 0.011        | 0.63 (0.30–1.35)        | 0.235        | 0.63 (0.29–1.38)               | 0.249   |

<sup>a)</sup> Multilevel logistic regression model

<sup>b)</sup> Multilevel negative binomial regression model

aOR: adjusted odds ratio, IRR: Incidence rate ratio, NCD: noncommunicable disease

642



643 **Table 4. The effect of multimorbidity on catastrophic expenditure**

| Variables                                  | Catastrophic health expenditure                  |          |                                                  |          |                                           |          |
|--------------------------------------------|--------------------------------------------------|----------|--------------------------------------------------|----------|-------------------------------------------|----------|
|                                            | 10% of total household expenditure <sup>a)</sup> |          | 25% of total household expenditure <sup>a)</sup> |          | 40% of non-food expenditure <sup>a)</sup> |          |
|                                            | aOR (95% CI)                                     | p values | aOR (95% CI)                                     | p values | aOR (95% CI)                              | p values |
| Number of NCDs (ref. no NCD)               |                                                  |          |                                                  |          |                                           |          |
| Single NCD                                 | 1.11 (0.76–1.62)                                 | 0.591    | 0.81 (0.49–1.34)                                 | 0.417    | 0.86 (0.52–1.43)                          | 0.561    |
| Two NCDs                                   | 1.58 (1.06–2.35)                                 | 0.026    | 1.39 (0.79–2.45)                                 | 0.250    | 1.27 (0.69–2.35)                          | 0.437    |
| Three or more NCDs                         | 1.69 (1.02–2.81)                                 | 0.042    | 0.96 (0.40–2.34)                                 | 0.937    | 0.72 (0.27–1.89)                          | 0.503    |
| Period (ref. 2007)                         |                                                  |          |                                                  |          |                                           |          |
| 2014                                       | 1.42 (1.12–1.80)                                 | 0.003    | 1.27 (0.83–1.95)                                 | 0.271    | 1.18 (0.77–1.80)                          | 0.442    |
| Sex (ref. Male)                            |                                                  |          |                                                  |          |                                           |          |
| Female                                     | 0.89 (0.64–1.23)                                 | 0.480    | 0.90 (0.57–1.42)                                 | 0.645    | 0.83 (0.52–1.33)                          | 0.432    |
| Age (ref. 50 – 60 years)                   |                                                  |          |                                                  |          |                                           |          |
| 61 – 70 years                              | 1.15 (0.79–1.69)                                 | 0.461    | 1.46 (0.90–2.36)                                 | 0.125    | 1.43 (0.85–2.38)                          | 0.175    |
| 71+ years                                  | 1.13 (0.66–1.92)                                 | 0.663    | 1.01 (0.51–2.01)                                 | 0.975    | 1.24 (0.60–2.55)                          | 0.563    |
| Marital status (ref. Not married)          |                                                  |          |                                                  |          |                                           |          |
| Currently married                          | 1.59 (1.22 – 2.09)                               | 0.001    | 1.68 (0.98–2.87)                                 | 0.060    | 1.83 (1.01–3.33)                          | 0.047    |
| Educational level (ref. No education)      |                                                  |          |                                                  |          |                                           |          |
| Primary                                    | 0.96 (0.67–1.38)                                 | 0.841    | 0.90 (0.52–1.55)                                 | 0.708    | 0.85 (0.48–1.52)                          | 0.589    |
| Junior high school                         | 0.97 (0.64–1.47)                                 | 0.902    | 1.21 (0.58–2.55)                                 | 0.610    | 0.60 (0.25–1.48)                          | 0.271    |
| Senior high school                         | 0.93 (0.61–1.42)                                 | 0.735    | 1.22 (0.59–2.52)                                 | 0.595    | 0.81 (0.34–1.92)                          | 0.627    |
| Tertiary                                   | 0.45 (0.22–0.90)                                 | 0.023    | 0.11 (0.01–0.94)                                 | 0.043    | 0.12 (0.02–0.84)                          | 0.032    |
| Ethnicity (ref. Javanese)                  |                                                  |          |                                                  |          |                                           |          |
| Sundanese                                  | 0.87 (0.62–1.23)                                 | 0.433    | 1.80 (0.98–3.33)                                 | 0.060    | 1.14 (0.52–2.48)                          | 0.748    |
| Others                                     | 0.76 (0.56–1.02)                                 | 0.065    | 1.01 (0.58–1.78)                                 | 0.959    | 0.56 (0.28–1.09)                          | 0.088    |
| Insurance coverage (ref. No)               |                                                  |          |                                                  |          |                                           |          |
| Yes                                        | 0.89 (0.67–1.20)                                 | 0.451    | 0.83 (0.53–1.31)                                 | 0.425    | 0.80 (0.49–1.32)                          | 0.390    |
| Type of work (ref. Unemployed)             |                                                  |          |                                                  |          |                                           |          |
| Casual                                     | 0.59 (0.33–1.07)                                 | 0.082    | 0.58 (0.29–1.17)                                 | 0.128    | 0.41 (0.20–0.84)                          | 0.015    |
| Self-employed                              | 0.60 (0.36–1.01)                                 | 0.056    | 0.58 (0.35–0.96)                                 | 0.033    | 0.45 (0.27–0.76)                          | 0.003    |
| Government/private                         | 0.58 (0.34–1.02)                                 | 0.058    | 0.78 (0.35–1.70)                                 | 0.527    | 0.39 (0.16–0.95)                          | 0.038    |
| Per capita household expenditure (ref. Q1) |                                                  |          |                                                  |          |                                           |          |
| Q2                                         | 1.04 (0.071– 1.52)                               | 0.834    | 1.60 (0.71–3.57)                                 | 0.257    | 1.34 (0.62–2.90)                          | 0.459    |
| Q3                                         | 1.37 (0.97–1.95)                                 | 0.076    | 1.71 (0.77–3.80)                                 | 0.188    | 1.19 (0.54–2.61)                          | 0.669    |
| Q4                                         | 1.98 (1.40–2.81)                                 | <0.0001  | 3.11 (1.43–6.76)                                 | 0.004    | 2.73 (1.23–6.03)                          | 0.013    |
| Q5                                         | 3.13 (2.28–4.31)                                 | <0.0001  | 5.91 (2.72–12.85)                                | <0.0001  | 8.45 (3.70–19.32)                         | <0.0001  |
| Residency (ref. Rural)                     |                                                  |          |                                                  |          |                                           |          |
| Urban                                      | 0.94 (0.61–1.45)                                 | 0.785    | 0.76 (0.46–1.24)                                 | 0.273    | 0.75 (0.43–1.31)                          | 0.309    |
| Region (ref. Java-Bali)                    |                                                  |          |                                                  |          |                                           |          |
| Sumatra                                    | 0.78 (0.56–1.09)                                 | 0.146    | 0.73 (0.38–1.38)                                 | 0.328    | 1.08 (0.52–2.24)                          | 0.846    |
| Nusa Tenggara                              | 0.64 (0.34 – 1.21)                               | 0.175    | 0.98 (0.32–2.99)                                 | 0.968    | 0.93 (0.22–3.83)                          | 0.917    |
| Kalimantan                                 | 0.78 (0.39–1.52)                                 | 0.460    | 0.64 (0.19–2.24)                                 | 0.488    | 0.64 (0.15–2.77)                          | 0.548    |
| Sulawesi                                   | 0.80 (0.43–1.48)                                 | 0.478    | 1.21 (0.41–3.57)                                 | 0.724    | 1.31 (0.33–5.17)                          | 0.701    |

<sup>a)</sup> Multilevel logistic regression model

aOR: adjusted odds ratio, NCD: noncommunicable disease

645 **Table 5. The effect of multimorbidity on productivity loss**

| Variables                                  | Productivity loss                  |          |                                            |          |                                    |          |
|--------------------------------------------|------------------------------------|----------|--------------------------------------------|----------|------------------------------------|----------|
|                                            | Labour participation <sup>a)</sup> |          | Days primary activity missed <sup>b)</sup> |          | Days confined in bed <sup>b)</sup> |          |
|                                            | aOR (95% CI)                       | p values | IRR (95% CI)                               | p values | IRR (95% CI)                       | p values |
| Number of NCDs (ref. no NCD)               |                                    |          |                                            |          |                                    |          |
| Single NCD                                 | 0.65 (0.54–0.79)                   | <0.0001  | 1.25 (1.08–1.43)                           | 0.002    | 1.09 (0.84–1.43)                   | 0.509    |
| Two NCDs                                   | 0.45 (0.35–0.57)                   | <0.0001  | 1.90 (1.58–2.29)                           | <0.0001  | 1.87 (1.33–2.61)                   | <0.0001  |
| Three or more NCDs                         | 0.23 (0.16–0.33)                   | <0.0001  | 2.59 (1.97–3.41)                           | <0.0001  | 2.64 (1.60–4.36)                   | <0.0001  |
| Period (ref. 2007)                         |                                    |          |                                            |          |                                    |          |
| 2014                                       | 0.69 (0.59–0.81)                   | <0.0001  | 1.66 (1.46–1.88)                           | <0.0001  | 1.79 (1.40–2.29)                   | <0.0001  |
| Sex (ref. Male)                            |                                    |          |                                            |          |                                    |          |
| Female                                     | 0.21 (0.17–0.26)                   | <0.0001  | 0.99 (0.86–1.14)                           | 0.912    | 0.92 (0.70–1.21)                   | 0.567    |
| Age (ref. 50 – 60 years)                   |                                    |          |                                            |          |                                    |          |
| 61 – 70 years                              | 0.37 (0.31–0.45)                   | <0.0001  | 0.99 (0.86–1.14)                           | 0.859    | 1.07 (0.81–1.41)                   | 0.617    |
| 71+ years                                  | 0.10 (0.07–0.13)                   | <0.0001  | 1.20 (1.00–1.44)                           | 0.047    | 1.93 (1.37–2.72)                   | <0.0001  |
| Marital status (ref. Not married)          |                                    |          |                                            |          |                                    |          |
| Currently married                          | 1.51 (1.23–1.84)                   | <0.0001  | 1.13 (0.98–1.31)                           | 0.089    | 0.88 (0.67–1.17)                   | 0.395    |
| Educational level (ref. No education)      |                                    |          |                                            |          |                                    |          |
| Primary                                    | 0.89 (0.71–1.11)                   | 0.305    | 0.92 (0.79–1.07)                           | 0.263    | 1.00 (0.75–1.33)                   | 0.999    |
| Junior high school                         | 0.41 (0.29–0.57)                   | <0.0001  | 0.94 (0.74–1.20)                           | 0.631    | 0.87 (0.54–1.40)                   | 0.570    |
| Senior high school                         | 0.41 (0.29–0.58)                   | <0.0001  | 0.68 (0.53–0.87)                           | 0.002    | 0.81 (0.51–1.28)                   | 0.362    |
| Tertiary                                   | 0.51 (0.31–0.82)                   | 0.006    | 0.54 (0.38–0.78)                           | 0.001    | 0.37 (0.18–0.78)                   | 0.009    |
| Ethnicity (ref. Javanese)                  |                                    |          |                                            |          |                                    |          |
| Sundanese                                  | 0.50 (0.37–0.67)                   | <0.0001  | 1.35 (1.11–1.65)                           | 0.003    | 1.28 (0.89–1.85)                   | 0.179    |
| Others                                     | 0.77 (0.61–0.98)                   | 0.033    | 1.11 (0.95–1.30)                           | 0.188    | 1.12 (0.84–1.49)                   | 0.436    |
| Insurance coverage (ref. No)               |                                    |          |                                            |          |                                    |          |
| Yes                                        | 0.85 (0.72–1.01)                   | 0.071    | 1.08 (0.95–1.22)                           | 0.258    | 1.05 (0.82–1.34)                   | 0.704    |
| Type of work (ref. Unemployed)             |                                    |          |                                            |          |                                    |          |
| Casual                                     | N/A                                | N/A      | 0.62 (0.51–0.75)                           | <0.0001  | 0.32 (0.22–0.47)                   | <0.0001  |
| Self-employed                              | N/A                                | N/A      | 0.62 (0.53–0.71)                           | <0.0001  | 0.42 (0.32–0.56)                   | <0.0001  |
| Government/private                         | N/A                                | N/A      | 0.57 (0.45–0.72)                           | <0.0001  | 0.45 (0.28–0.73)                   | 0.001    |
| Per capita household expenditure (ref. Q1) |                                    |          |                                            |          |                                    |          |
| Q2                                         | 1.37 (1.08–1.75)                   | 0.011    | 1.03 (0.86–1.23)                           | 0.744    | 1.05 (0.74–1.49)                   | 0.769    |
| Q3                                         | 1.33 (1.03–1.71)                   | 0.028    | 1.15 (0.96–1.38)                           | 0.130    | 1.06 (0.75–1.50)                   | 0.737    |
| Q4                                         | 1.12 (0.87–1.46)                   | 0.379    | 1.05 (0.87–1.27)                           | 0.627    | 1.02 (0.71–1.46)                   | 0.914    |
| Q5                                         | 1.34 (1.01–1.77)                   | 0.043    | 1.29 (1.05–1.58)                           | 0.015    | 0.92 (0.63–1.35)                   | 0.668    |
| Residency (ref. Rural)                     |                                    |          |                                            |          |                                    |          |
| Urban                                      | 0.44 (0.35–0.54)                   | <0.0001  | 0.93 (0.81–1.07)                           | 0.296    | 0.70 (0.54–0.89)                   | 0.004    |
| Region (ref. Java-Bali)                    |                                    |          |                                            |          |                                    |          |
| Sumatra                                    | 0.95 (0.73–1.25)                   | 0.735    | 1.13 (0.94–1.36)                           | 0.194    | 1.01 (0.73–1.40)                   | 0.956    |
| Nusa Tenggara                              | 0.74 (0.48–1.14)                   | 0.177    | 0.90 (0.68–1.20)                           | 0.472    | 1.14 (0.67–1.93)                   | 0.638    |
| Kalimantan                                 | 1.21 (0.75–1.94)                   | 0.440    | 0.90 (0.67–1.22)                           | 0.511    | 0.89 (0.51–1.57)                   | 0.688    |
| Sulawesi                                   | 0.39 (0.24–0.62)                   | <0.0001  | 0.99 (0.72–1.36)                           | 0.948    | 0.94 (0.53–1.69)                   | 0.845    |

<sup>a)</sup> Multilevel logistic regression model

<sup>b)</sup> Multilevel negative binomial regression model

aOR: adjusted odds ratio, IRR: incidence rate ratio, NCD: noncommunicable disease

646



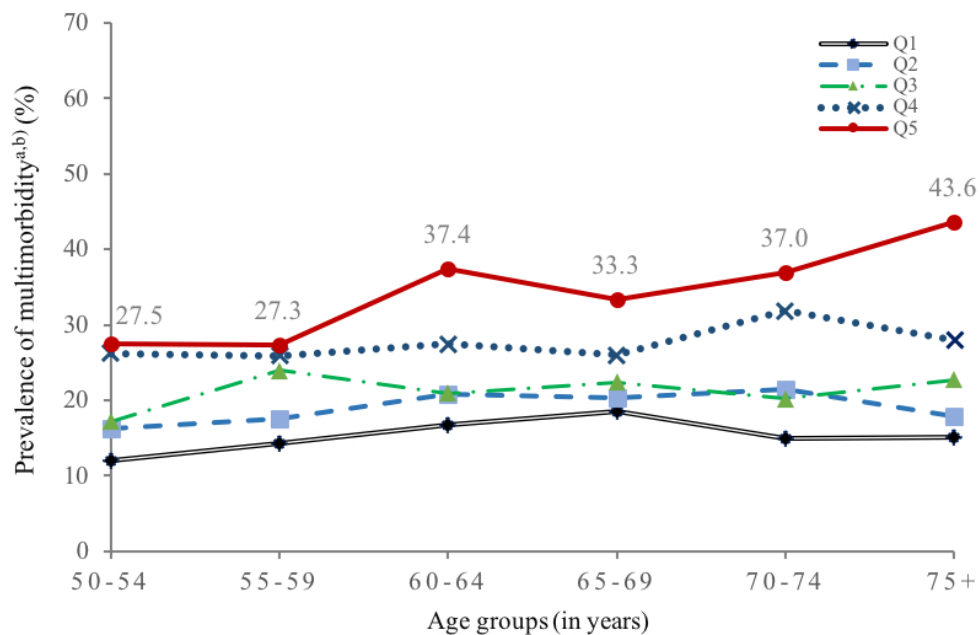

Figure 1. Prevalence of multimorbidity by age group and per capita household expenditure  
 a) respondents who reported that they had 2 or more chronic conditions related to non-communicable  
 diseases (NCDs). b) Pooled sample of Wave 4 and Wave 5. Q1-Q5 refer to household expenditure quintiles,  
 where Q1 is the lowest and Q5 the highest household expenditure quintile.

137x91mm (150 x 150 DPI)

## SUPPLEMENTAL MATERIAL

Figure S1. Sample flowchart

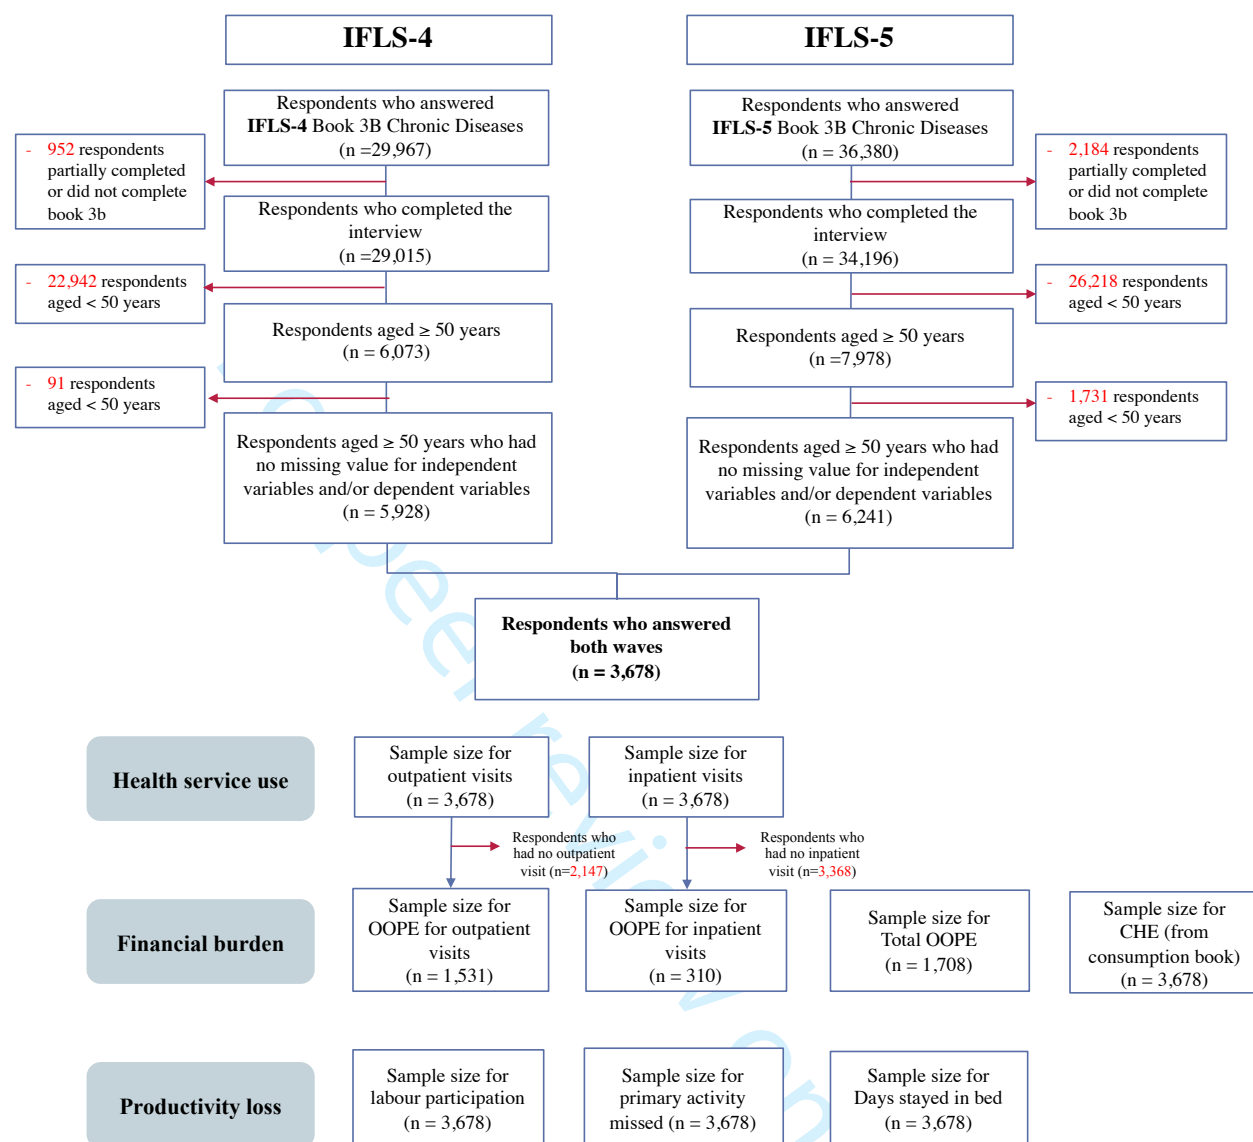

**Table S1. List of variables for 2007 & 2014 IFLS analysis**

| Variables                          | Type                | Measurement                                        | Source of measurement                                                                                                                                                                    |
|------------------------------------|---------------------|----------------------------------------------------|------------------------------------------------------------------------------------------------------------------------------------------------------------------------------------------|
| <b>Dependent variables:</b>        |                     |                                                    |                                                                                                                                                                                          |
| 1) Health service use              |                     |                                                    |                                                                                                                                                                                          |
| Outpatient care                    | Binary              | 0. No<br>1. Yes                                    | RJ00: In the last 4 weeks have you visited a public hospital- <i>puskesmas</i> -private hospital-clinic-health worker or doctor's practice or been visited by a health worker or doctor? |
|                                    | Numerical           | Number of days                                     | RJ02: How many times did you visit / been visited by [...] during the last 4 weeks?                                                                                                      |
| Inpatient care                     | Binary              | 0. No<br>1. Yes                                    | RN00: During the past 12 months have you ever received patient care at a hospital- <i>puskesmas</i> -clinic-or other?                                                                    |
|                                    | Numerical           | Number of days                                     | RN02: How many times have you received inpatient care at [...] during the past 12 months?                                                                                                |
| 2) Productivity loss               |                     |                                                    |                                                                                                                                                                                          |
| Labour participation               | Binary              | 0. No<br>1. Yes                                    | TK06a: Did you work/try to work/help to earn income for pay for at least 1 hour during the past week?                                                                                    |
|                                    | Numerical           | Number of days                                     |                                                                                                                                                                                          |
| Activity missed due to poor health | Numerical           | Number of days                                     | KK02a: During the last 4 weeks-how many days of your primary daily activities did you miss due to poor health?                                                                           |
| Stayed in bed                      | Numerical           | Number of days                                     | KK02b: In the last 4 weeks-how many days have you stayed in bed due to poor health?                                                                                                      |
| 3) Financial burden                |                     |                                                    |                                                                                                                                                                                          |
| OOPE of outpatient care            | Numerical           | International Dollars                              | RJ02b: How much did you pay out of pocket for outpatient care at [...] during the past 4 weeks?                                                                                          |
| OOPE of inpatient care             | Numerical           | International Dollars                              | RN02b: How much did you pay out of pocket for inpatient care at [...] during the past 12 months?                                                                                         |
| Annual Total OOPE                  | Numerical           | International Dollars                              | Annual total OOPE for outpatient and inpatient visits                                                                                                                                    |
| Catastrophic health expenditure    | Binary              | 0. No<br>1. Yes                                    | Book KS:<br>"How much money spent by all household members for medical costs during the past year?"                                                                                      |
| <b>Main independent variable</b>   |                     |                                                    |                                                                                                                                                                                          |
| Number of NCDs                     | Numerical           | Total number of chronic conditions related to NCDs | Book IIIB:<br>CD06a – CD06r: Have a doctor/paramedic/nurse/ midwife ever told you that you had [list of chronic diseases]                                                                |
|                                    | Categorical ordinal | 2. No<br>3. 1 NCD<br>4. 2 NCDs                     |                                                                                                                                                                                          |

| Variables                                                                                                                                                                                                                                                                                                                    | Type                | Measurement                                               | Source of measurement                                                                                                                                                                         |
|------------------------------------------------------------------------------------------------------------------------------------------------------------------------------------------------------------------------------------------------------------------------------------------------------------------------------|---------------------|-----------------------------------------------------------|-----------------------------------------------------------------------------------------------------------------------------------------------------------------------------------------------|
| Multimorbidity                                                                                                                                                                                                                                                                                                               | Binary              | 5. 3+ NCDs                                                | Book IIIB:<br>CD06a – CD06r: Have a doctor/paramedic/nurse/ midwife ever told you that you had [list of chronic diseases]                                                                     |
|                                                                                                                                                                                                                                                                                                                              |                     | 0. No                                                     |                                                                                                                                                                                               |
|                                                                                                                                                                                                                                                                                                                              |                     | 1. Yes (had 2 or more chronic conditions related to NCDs) |                                                                                                                                                                                               |
| List of chronic diseases included in the main analysis:<br>Hypertension, diabetes, asthma, heart attack/coronary heart diseases, liver disease, stroke, cancer, arthritis/rheumatism, hypercholesterolemia, and depression/mental illness.                                                                                   |                     |                                                           |                                                                                                                                                                                               |
| List of chronic diseases in 2007 IFLS (Wave 4): Hypertension, diabetes, asthma, heart attack/coronary heart diseases, liver disease, stroke, cancer, arthritis/rheumatism, hypercholesterolemia, and depression/mental illness.                                                                                              |                     |                                                           |                                                                                                                                                                                               |
| List of chronic diseases in 2014 IFLS (Wave 5): Hypertension, diabetes, asthma, heart attack/coronary heart diseases, liver disease, stroke, cancer, arthritis/rheumatism, hypercholesterolemia, mental illness, prostate diseases, kidney diseases (excluding malignancy), digestive diseases, and memory-related diseases. |                     |                                                           |                                                                                                                                                                                               |
| <b>Covariates</b>                                                                                                                                                                                                                                                                                                            |                     |                                                           |                                                                                                                                                                                               |
| Age (in years)                                                                                                                                                                                                                                                                                                               | Categorical ordinal | 0. 40-49 years                                            | Book IIIA:<br>Age: How old are you?                                                                                                                                                           |
|                                                                                                                                                                                                                                                                                                                              |                     | 1. 50-59 years                                            |                                                                                                                                                                                               |
|                                                                                                                                                                                                                                                                                                                              |                     | 2. 60-69 years                                            |                                                                                                                                                                                               |
|                                                                                                                                                                                                                                                                                                                              |                     | 3. 70-79 years                                            |                                                                                                                                                                                               |
|                                                                                                                                                                                                                                                                                                                              |                     | 4. 80+                                                    |                                                                                                                                                                                               |
| Sex                                                                                                                                                                                                                                                                                                                          | Binary              | 0. Male                                                   | Book IIIA:<br>Sex: (identified by interviewers)                                                                                                                                               |
|                                                                                                                                                                                                                                                                                                                              |                     | 1. Female                                                 |                                                                                                                                                                                               |
| Ethnicity                                                                                                                                                                                                                                                                                                                    | Categorical nominal | 0. Javanese                                               |                                                                                                                                                                                               |
|                                                                                                                                                                                                                                                                                                                              |                     | 1. Sundanese                                              |                                                                                                                                                                                               |
|                                                                                                                                                                                                                                                                                                                              |                     | 2. Others                                                 |                                                                                                                                                                                               |
| Marital status                                                                                                                                                                                                                                                                                                               | Binary              | 0. Unmarried/Divorce                                      | Book IIIA<br>HR00b: Are you currently married?                                                                                                                                                |
|                                                                                                                                                                                                                                                                                                                              |                     | 1. Married or living together                             |                                                                                                                                                                                               |
| Education                                                                                                                                                                                                                                                                                                                    | Categorical ordinal | 0. None                                                   | Book IIIA:<br>DL06: What is the highest education level attended?<br>DL07: What is the highest grade completed at school.                                                                     |
|                                                                                                                                                                                                                                                                                                                              |                     | 1. Elementary school                                      |                                                                                                                                                                                               |
|                                                                                                                                                                                                                                                                                                                              |                     | 2. Junior high school                                     |                                                                                                                                                                                               |
|                                                                                                                                                                                                                                                                                                                              |                     | 3. High school                                            |                                                                                                                                                                                               |
|                                                                                                                                                                                                                                                                                                                              |                     | 4. Tertiary                                               |                                                                                                                                                                                               |
| Occupation                                                                                                                                                                                                                                                                                                                   | Categorical nominal | 0. None                                                   | Book IIIA:<br>TK06a: Did you work/try to work/help to earn income for pay for at least 1 hour during the past week?<br>TK15: Which category best describes the work you did in your last job? |
|                                                                                                                                                                                                                                                                                                                              |                     | 1. Casual worker                                          |                                                                                                                                                                                               |
|                                                                                                                                                                                                                                                                                                                              |                     | 2. Self-employed                                          |                                                                                                                                                                                               |
|                                                                                                                                                                                                                                                                                                                              |                     | 3. Government/private worker                              |                                                                                                                                                                                               |
| Health insurance status                                                                                                                                                                                                                                                                                                      | Binary              | 0. Uninsured (Not covered by any insurance)               | Book IIIB:<br>AK01: Are you the policy holder/primary beneficiary of health benefits-health insurance?                                                                                        |
|                                                                                                                                                                                                                                                                                                                              |                     | 1. Insured                                                |                                                                                                                                                                                               |
| Per capita expenditure                                                                                                                                                                                                                                                                                                       | Categorical ordinal | 0. Q1 (lowest)                                            | Book KS                                                                                                                                                                                       |
|                                                                                                                                                                                                                                                                                                                              |                     | 1. Q2                                                     |                                                                                                                                                                                               |
|                                                                                                                                                                                                                                                                                                                              |                     | 2. Q3                                                     |                                                                                                                                                                                               |
|                                                                                                                                                                                                                                                                                                                              |                     | 3. Q4                                                     |                                                                                                                                                                                               |
|                                                                                                                                                                                                                                                                                                                              |                     | 4. Q5 (highest)                                           |                                                                                                                                                                                               |
| Residency                                                                                                                                                                                                                                                                                                                    | Binary              | 0. Rural                                                  | Book T-2:<br>SC06: (identified by interviewers)                                                                                                                                               |
|                                                                                                                                                                                                                                                                                                                              |                     | 1. Urban                                                  |                                                                                                                                                                                               |
| Region                                                                                                                                                                                                                                                                                                                       | Categorical nominal | 0. Java-Bali                                              | Book T-2:<br>SC01: province (identified by interviewers)                                                                                                                                      |
|                                                                                                                                                                                                                                                                                                                              |                     | 1. Sumatra                                                |                                                                                                                                                                                               |
|                                                                                                                                                                                                                                                                                                                              |                     | 2. Nusa Tenggara                                          |                                                                                                                                                                                               |
|                                                                                                                                                                                                                                                                                                                              |                     | 3. Kalimantan                                             |                                                                                                                                                                                               |
|                                                                                                                                                                                                                                                                                                                              |                     | 4. Sulawesi                                               |                                                                                                                                                                                               |

**Table S2. Sample characteristics by number of NCDs**

| Characteristics       | 2007 (n=3,678)        |                      |                           | 2014 (n=3,678)        |                      |                           |
|-----------------------|-----------------------|----------------------|---------------------------|-----------------------|----------------------|---------------------------|
|                       | Zero NCD<br>(n=1,272) | One NCD<br>(n=1,605) | Multimorbidity<br>(n=801) | Zero NCD<br>(n=1,052) | One NCD<br>(n=1,751) | Multimorbidity<br>(n=875) |
| Sex                   |                       |                      |                           |                       |                      |                           |
| Male                  | 44.2 (41.5–46.9)      | 41.7 (39.1–44.5)     | 14.1 (12.3–16.1)          | 34.7 (32.1–37.3)      | 45.9 (43.2–48.7)     | 19.3 (17.3–21.6)          |
| Female                | 28.9 (26.7–31.3)      | 44.2 (41.7–46.7)     | 26.9 (24.8–29.2)          | 24.6 (22.5–26.8)      | 51.1 (48.6–53.6)     | 24.3 (22.3–26.4)          |
| Age                   |                       |                      |                           |                       |                      |                           |
| 50 – 60 years         | 39.9 (37.55–42.2)     | 40.3 (38.0–42.6)     | 19.9 (18.1–21.8)          | 36.4 (33.0–39.9)      | 40.1 (36.6–43.7)     | 23.5 (20.7–26.7)          |
| 61 – 70 years         | 32.3 (29.1–35.6)      | 45.9 (42.5–49.3)     | 21.9 (19.2–24.8)          | 30.2 (27.7–32.9)      | 48.2 (45.4–51.0)     | 21.6 (19.4–23.9)          |
| 71+ years             | 23.9 (19.2–29.3)      | 50.9 (45.2–56.6)     | 25.2 (20.6–30.4)          | 22.0 (19.4–25.0)      | 56.6 (53.2–59.8)     | 21.4 (18.8–24.2)          |
| Marital status        |                       |                      |                           |                       |                      |                           |
| Not currently married | 25.6 (22.5–29.0)      | 48.3 (44.6–52.0)     | 26.1 (23.0–29.4)          | 23.8 (21.2–26.5)      | 52.9 (49.9–56.0)     | 23.3 (20.9–25.9)          |
| Currently married     | 39.5 (37.4–41.6)      | 41.2 (39.1–43.4)     | 19.3 (17.7–21.1)          | 32.4 (30.2–34.6)      | 46.3 (44.0–48.7)     | 21.3 (19.5–23.2)          |
| Educational level     |                       |                      |                           |                       |                      |                           |
| No education          | 24.8 (32.5–37.2)      | 44.8 (42.3–47.2)     | 20.4 (18.5–22.5)          | 29.6 (27.4–31.9)      | 52.4 (50.0–54.8)     | 18.0 (16.2–19.8)          |
| Primary               | 40.5 (36.9–44.2)      | 39.8 (36.2–46.3)     | 19.7 (17.0–22.7)          | 28.6 (25.3–32.1)      | 47.5 (43.7–51.3)     | 24.0 (20.9–27.3)          |
| Junior high school    | 34.4 (28.3–41.1)      | 39.6 (33.4–46.3)     | 25.9 (20.5–32.3)          | 31.6 (25.6–38.3)      | 32.1 (26.1–38.7)     | 36.3 (30.2–43.0)          |
| Senior high school    | 35.9 (30.2–42.1)      | 43.6 (37.5–49.8)     | 20.5 (15.8–25.9)          | 28.9 (23.4–35.0)      | 41.6 (35.6–48.0)     | 29.5 (24.1–35.5)          |
| Tertiary              | 23.7 (16.2–33.2)      | 41.9 (32.1–52.4)     | 34.4 (25.2–44.8)          | 23.0 (15.8–32.2)      | 35.7 (27.0–45.5)     | 41.2 (31.6–51.6)          |
| Ethnicity             |                       |                      |                           |                       |                      |                           |
| Javanese              | 37.0 (34.5–39.6)      | 43.6 (41.0–46.2)     | 19.4 (17.4–21.5)          | 29.7 (27.4–32.1)      | 50.6 (48.1–53.2)     | 19.7 (17.8–21.8)          |
| Sundanese             | 30.4 (25.9–35.2)      | 40.5 (35.7–45.5)     | 29.1 (24.8–33.9)          | 23.5 (19.6–27.9)      | 49.3 (44.3–54.2)     | 27.3 (23.1–31.8)          |
| Others                | 37.0 (34.2–39.9)      | 43.4 (40.5–46.3)     | 19.6 (17.4–22.0)          | 31.7 (29.0–34.7)      | 44.6 (41.6–47.7)     | 23.6 (21.2–26.2)          |
| Insurance coverage    |                       |                      |                           |                       |                      |                           |
| No                    | 36.5 (34.4–38.6)      | 43.2 (41.1–45.4)     | 20.3 (18.6–22.1)          | 31.1 (28.9–33.5)      | 50.2 (47.7–52.7)     | 18.7 (16.9–20.7)          |
| Yes                   | 34.2 (30.9–37.7)      | 42.5 (39.1–46.0)     | 23.2 (20.4–26.4)          | 26.7 (24.3–29.2)      | 46.8 (44.1–49.6)     | 26.4 (24.2–28.9)          |
| Type of work          |                       |                      |                           |                       |                      |                           |
| Unemployed            | 22.5 (19.6–25.6)      | 46.2 (42.6–49.8)     | 31.4 (28.1–34.9)          | 19.6 (17.4–22.1)      | 50.4 (47.5–53.3)     | 29.9 (27.4–32.6)          |
| Casual                | 41.8 (37.6–46.1)      | 41.3 (37.2–45.6)     | 16.9 (13.9–20.4)          | 36.5 (31.6–41.6)      | 49.7 (44.6–54.8)     | 13.8 (10.7–17.6)          |
| Self-employed         | 41.1 (38.4–43.9)      | 42.1 (39.4–44.8)     | 16.8 (14.9–18.9)          | 34.2 (31.5–37.0)      | 48.4 (45.4–51.3)     | 17.4 (15.4–19.7)          |
| Government/private    | 34.8 (29.8–40.2)      | 43.0 (37.7–48.4)     | 22.2 (18.0–27.1)          | 39.6 (33.0–46.5)      | 39.4 (32.9–46.3)     | 21.0 (15.8–27.4)          |
| Household expenditure |                       |                      |                           |                       |                      |                           |
| Q1 (the lowest)       | 39.9 (36.0–43.9)      | 44.1 (40.1–48.1)     | 15.8 (13.0–18.9)          | 30.9 (27.5–34.6)      | 55.6 (51.8–59.3)     | 13.5 (11.1–16.2)          |
| Q2                    | 39.6 (35.7–43.6)      | 42.4 (38.6–46.4)     | 17.9 (15.1–21.2)          | 31.6 (27.9–35.5)      | 49.5 (45.4–53.6)     | 18.9 (15.9–22.3)          |
| Q3                    | 36.4 (32.5–40.5)      | 43.1 (39.1–47.2)     | 20.5 (17.4–24.0)          | 31.4 (27.7–35.3)      | 46.5 (42.5–50.6)     | 22.1 (18.9–25.7)          |
| Q4                    | 31.7 (27.9–35.7)      | 44.6 (40.5–48.7)     | 23.6 (20.3–27.3)          | 27.0 (23.3–31.1)      | 47.8 (43.4–52.1)     | 25.3 (21.9–29.0)          |
| Q5 (the highest)      | 28.8 (24.9–33.0)      | 40.5 (36.3–44.9)     | 30.4 (26.5–34.7)          | 23.1 (19.6–27.0)      | 40.7 (36.5–45.0)     | 36.2 (32.2–40.5)          |
| Residency             |                       |                      |                           |                       |                      |                           |
| Rural                 | 38.7 (36.3–41.1)      | 43.2 (40.8–45.7)     | 18.1 (16.3–20.1)          | 31.0 (28.6–33.5)      | 52.1 (49.4–54.7)     | 16.9 (15.1–19.0)          |
| Urban                 | 31.2 (28.7–33.7)      | 42.7 (40.1–45.4)     | 26.1 (23.8–28.6)          | 27.3 (25.1–29.6)      | 45.0 (42.5–47.5)     | 27.7 (25.5–30.0)          |
| Island                |                       |                      |                           |                       |                      |                           |
| Java-Bali             | 36.5 (34.4–38.7)      | 41.9 (39.7–44.1)     | 21.6 (19.9–23.5)          | 29.7 (27.7–31.7)      | 49.3 (47.1–51.5)     | 21.1 (19.3–22.9)          |
| Sumatra               | 34.6 (31.0–38.4)      | 45.9 (42.0–49.8)     | 19.6 (16.7–22.8)          | 27.9 (24.6–31.6)      | 45.4 (41.6–49.4)     | 26.6 (23.3–30.2)          |
| Nusa Tenggara         | 44.0 (37.7–50.5)      | 41.6 (35.3–48.1)     | 14.5 (10.6–19.5)          | 31.4 (25.7–37.7)      | 54.1 (47.6–60.5)     | 14.5 (10.5–19.6)          |
| Kalimantan            | 25.2 (19.2–32.4)      | 56.9 (49.0–64.4)     | 17.9 (12.7–24.5)          | 23.4 (17.6–30.6)      | 42.4 (35.0–50.1)     | 34.2 (27.4–41.7)          |
| Sulawesi              | 30.0 (23.3–37.6)      | 50.4 (42.6–58.2)     | 19.6 (14.1–26.6)          | 26.7 (20.3–34.2)      | 49.7 (41.8–57.5)     | 23.7 (17.6–31.0)          |
| Overall (N, %)        | 1,272 (35.9)          | 1,605 (43.0)         | 801 (21.0)                | 1,052 (29.2)          | 1,751 (48.7)         | 875 (22.0)                |

**Figure S2. Prevalence of multimorbidity by age group and level of education**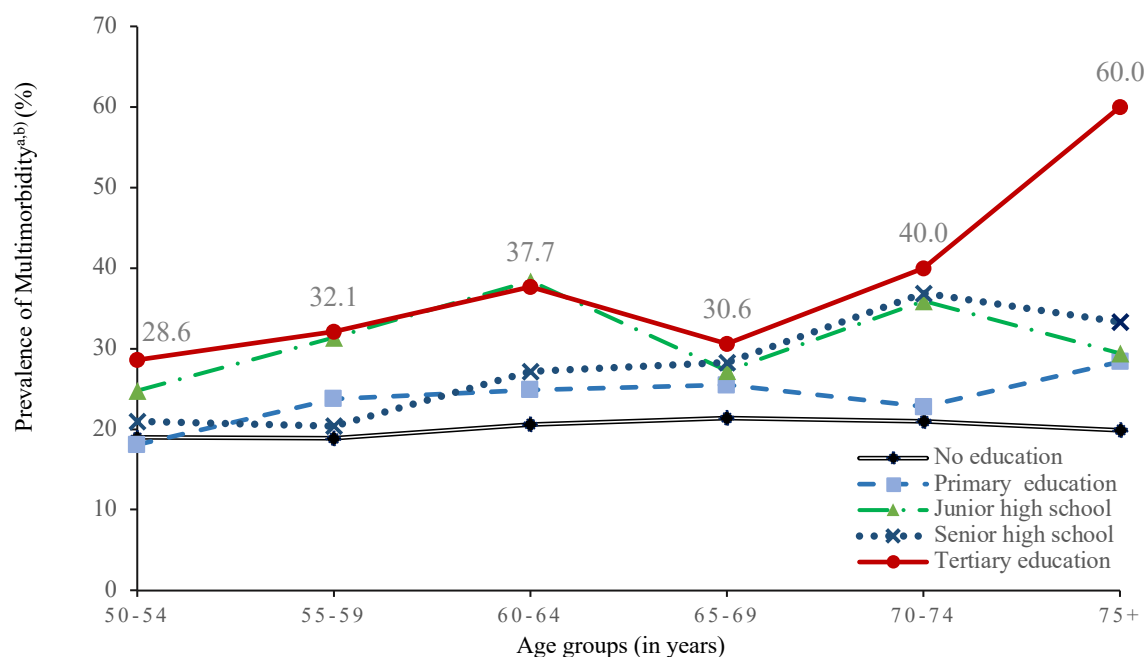

a) respondents who reported that they had 2 or more chronic conditions related to noncommunicable diseases (NCDs). b) Pooled sample of Wave 4 and Wave 5.

**Table S3. Intraclass correlation coefficients (ICC) on multimorbidity, health service use and labour participation**

|                   | Multimorbidity | Any outpatient visit | Any inpatient visit | 10% of total household expenditure | 25% of total household expenditure | 40% of non-food expenditure | Labour participation |
|-------------------|----------------|----------------------|---------------------|------------------------------------|------------------------------------|-----------------------------|----------------------|
| <b>Individual</b> |                |                      |                     |                                    |                                    |                             |                      |
| Variance (SE)     | 1.09 (0.25)    | 0.10 (0.18)          | 0.57 (0.74)         | 0 (0)                              | 0 (0)                              | 0 (0)                       | 1.22 (0.30)          |
| ICC (SE)          | 0.34 (0.03)    | 0.14 (0.03)          | 0.25 (0.12)         | 0.25 (0.03)                        | 0.48 (0.04)                        | 0.69 (0.04)                 | 0.48 (0.03)          |
| <b>Household</b>  |                |                      |                     |                                    |                                    |                             |                      |
| Variance (SE)     | 0.64 (0.20)    | 0.43 (0.14)          | 0.54 (0.57)         | 1.13 (0.20)                        | 3.08 (0.55)                        | 7.29 (1.3)                  | 1.70 (0.28)          |
| ICC (SE)          | 0.13 (0.40)    | 0.11 (0.04)          | 0.12 (0.12)         | 0.25 (0.03)                        | 0.48 (0.04)                        | 0.69 (0.04)                 | 0.28 (0.04)          |
| <b>District</b>   |                |                      |                     |                                    |                                    |                             |                      |
| Variance (SE)     | 0 (0)          | 0 (0)                | 0 (0)               | 0 (0)                              | 0 (0)                              | 0 (0)                       | 0.07 (0.04)          |
| ICC (SE)          | 0 (0)          | 0 (0)                | 0 (0)               | 0 (0)                              | 0 (0)                              | 0 (0)                       | 0.01 (0.01)          |

Note:

All models are controlled for study variables, including sex, age, marital status, education, ethnicity, insurance coverage, type of work, per capita expenditure (PCE), residency, and region. SE: standard error. ICC: intraclass correlation

**Table S4. Robustness check: descriptive summary and factors associated with multimorbidity (cross-sectional analysis of 2014 IFLS)**

| Characteristics          | Weighted %<br>Of sample | Zero NCD<br>(%, 95% CI) | One NCD<br>(%, 95% CI) | Two NCDs<br>(%, 95% CI) | Three or more<br>NCDs<br>(%, 95% CI) | Multimorbidity <sup>b</sup><br>(%, 95% CI) | aOR (95% CI)        |
|--------------------------|-------------------------|-------------------------|------------------------|-------------------------|--------------------------------------|--------------------------------------------|---------------------|
| Sex                      |                         |                         |                        |                         |                                      |                                            |                     |
| Female                   | 51.9                    | 24.8 (22.3, 26.3)       | 46.1 (44.4, 47.8)      | 18.8 (17.5, 20.1)       | 10.3 (9.3, 11.4)                     | 29.1 (27.6, 30.6)                          | 1                   |
| Male                     | 48.1                    | 36.5 (34.7, 38.3)       | 42.0 (40.2, 43.9)      | 14.0 (12.8, 15.4)       | 7.4 (6.5, 8.4)                       | 21.5 (20.0, 23.0)                          | 0.68*** (0.59–0.78) |
| Age                      |                         |                         |                        |                         |                                      |                                            |                     |
| 50 – 60 years            | 56.2                    | 35.3 (33.7, 37.1)       | 41.0 (39.3, 42.7)      | 15.2 (14.0, 16.5)       | 8.5 (7.6, 9.5)                       | 23.7 (22.8, 25.2)                          | 1                   |
| 61 – 70 years            | 25.6                    | 26.5 (24.4, 28.8)       | 45.4 (42.9, 47.9)      | 17.7 (15.9, 19.6)       | 10.4 (9.0, 11.9)                     | 28.1 (25.6, 30.3)                          | 1.23*** (1.10–1.42) |
| 71+ years                | 18.2                    | 20.8 (18.6, 23.3)       | 52.2 (49.4, 55.1)      | 18.8 (16.7, 21.0)       | 8.2 (6.8, 9.8)                       | 26.9 (24.6, 29.5)                          | 1.85 (0.99–1.42)    |
| Marital status           |                         |                         |                        |                         |                                      |                                            |                     |
| Not currently married    | 28.2                    | 24.7 (22.7, 26.8)       | 46.9 (44.6, 49.2)      | 19.3 (17.5, 21.2)       | 9.1 (8.0, 10.5)                      | 28.4 (26.4, 30.5)                          | 1                   |
| Currently married        | 71.8                    | 32.7 (31.3, 34.1)       | 43.1 (41.6, 44.6)      | 15.4 (14.4, 16.5)       | 8.8 (8.0, 9.7)                       | 24.2 (23.0, 25.5)                          | 1.05 (0.89–1.21)    |
| Educational level        |                         |                         |                        |                         |                                      |                                            |                     |
| No education             | 53.3                    | 31.3 (29.7, 33.0)       | 47.7 (45.9, 49.4)      | 14.1 (13.0, 15.4)       | 6.9 (6.1, 7.8)                       | 21.0 (19.7, 22.4)                          | 1                   |
| Primary                  | 23.8                    | 30.0 (27.6, 32.4)       | 42.8 (40.2, 45.4)      | 18.2 (16.3, 20.3)       | 9.0 (7.7, 10.6)                      | 27.2 (25.0, 29.6)                          | 1.35*** (1.16–1.57) |
| Junior high school       | 7.8                     | 30.9 (27.0, 35.1)       | 34.8 (30.7, 39.1)      | 20.2 (16.9, 23.9)       | 14.2 (11.4, 17.5)                    | 34.4 (30.3, 38.6)                          | 1.66*** (1.33–2.06) |
| Senior high school       | 10.0                    | 30.4 (26.9, 34.1)       | 38.7 (35.0, 42.6)      | 18.0 (15.3, 21.1)       | 12.8 (10.4, 15.7)                    | 30.9 (27.4, 34.5)                          | 1.23 (0.99–1.53)    |
| Tertiary                 | 5.1                     | 22.8 (18.5, 27.8)       | 38.7 (33.5, 44.2)      | 24.4 (20.0, 29.4)       | 14.1 (10.6, 18.4)                    | 38.4 (33.3, 43.9)                          | 1.77*** (1.33–2.36) |
| Ethnicity                |                         |                         |                        |                         |                                      |                                            |                     |
| Javanese                 | 56.3                    | 31.3 (29.7, 33.0)       | 45.7 (44.0, 47.5)      | 15.2 (14.0, 16.5)       | 7.7 (6.8, 8.6)                       | 22.9 (21.5, 24.4)                          | 1                   |
| Sundanese                | 15.5                    | 22.9 (20.1, 25.9)       | 43.4 (40.0, 46.8)      | 21.1 (18.4, 24.0)       | 12. (10.6, 15.1)                     | 33.7 (30.6, 37.0)                          | 1.53*** (1.28–1.83) |
| Others                   | 28.2                    | 32.7 (30.8, 34.7)       | 41.5 (39.4, 43.5)      | 16.5 (15.1, 18.0)       | 9.3 (8.2, 10.6)                      | 25.8 (24.1, 27.6)                          | 1.04 (0.89–1.22)    |
| Had any health insurance |                         |                         |                        |                         |                                      |                                            |                     |
| No                       | 53.9                    | 32.4 (30.8, 34.1)       | 46.2 (44.4, 47.9)      | 14.3 (13.1, 15.5)       | 7.1 (6.3, 8.1)                       | 21.4 (20.1, 22.9)                          | 1                   |
| Yes                      | 46.1                    | 28.1 (26.5, 29.8)       | 41.8 (40.0, 43.6)      | 19.0 (17.7, 20.5)       | 11.0 (9.9, 12.2)                     | 30.0 (28.4, 31.7)                          | 1.22*** (1.23–1.57) |
| Type of work             |                         |                         |                        |                         |                                      |                                            |                     |
| Unemployed               | 30.6                    | 19.8 (18.1, 21.7)       | 44.2 (42.0, 46.4)      | 21.3 (19.6, 23.2)       | 14.6 (13.2, 16.3)                    | 36.0 (33.9, 38.1)                          | 1                   |
| Casual                   | 15.6                    | 36.1 (33.0, 39.4)       | 45.5 (42.2, 48.7)      | 13.3 (11.3, 15.7)       | 5.0 (3.8, 6.6)                       | 18.4 (16.0, 21.0)                          | 0.50*** (0.41–0.62) |
| Self-employed            | 39.8                    | 34.6 (32.7, 36.6)       | 44.4 (42.4, 46.4)      | 14.5 (13.2, 16.0)       | 6.4 (5.5, 7.5)                       | 21.0 (19.4, 22.7)                          | 0.57*** (0.49–0.66) |
| Government/private       | 14.0                    | 35.2 (32.0, 38.6)       | 41.9 (38.6, 45.4)      | 15.0 (12.8, 17.5)       | 7.8 (6.2, 9.9)                       | 22.8 (20.1, 25.8)                          | 0.50*** (0.40–0.62) |
| Household expenditure    |                         |                         |                        |                         |                                      |                                            |                     |
| Q1 (the lowest)          | 21.3                    | 33.2 (30.7, 35.9)       | 49.3 (46.5, 52.1)      | 12.7 (11.0, 14.6)       | 4.8 (3.7, 6.1)                       | 17.5 (15.5, 19.6)                          | 1                   |
| Q2                       | 20.9                    | 33.5 (30.8, 36.2)       | 45.0 (42.3, 47.9)      | 15.6 (13.7, 17.7)       | 5.8 (4.6, 7.3)                       | 21.5 (19.2, 23.8)                          | 1.28** (1.05–1.58)  |
| Q3                       | 19.8                    | 31.7 (29.1, 34.4)       | 43.7 (41.0, 46.5)      | 6.0 (4.0, 18.1)         | 8.6 (7.2, 10.3)                      | 24.6 (22.2, 17.1)                          | 1.46*** (1.19–1.78) |
| Q4                       | 19.5                    | 28.8 (26.3, 31.5)       | 41.5 (38.7, 44.3)      | 18.8 (16.7, 21.1)       | 10.9 (9.3, 12.7)                     | 19.7 (27.2, 32.3)                          | 1.80*** (1.47–2.20) |
| Q5 (the highest)         | 18.5                    | 24.0 (21.7, 26.5)       | 40.5 (37.8, 43.3)      | 19.9 (17.8, 22.2)       | 15.5 (13.5, 17.6)                    | 35.4 (32.8, 38.1)                          | 2.03*** (1.65–2.50) |
| Residency                |                         |                         |                        |                         |                                      |                                            |                     |
| Rural                    | 48.9                    | 33.3 (31.5, 35.1)       | 46.4(44.5, 48.3)       | 14.2 (12.9, 15.5)       | 6.1 (5.2, 7.0)                       | 20.3 (18.8, 21.8)                          | 1                   |
| Urban                    | 51.3                    | 27.7 (26.2, 29.2)       | 42.0 (40.3, 43.7)      | 19.0 (17.4, 20.0)       | 11.6 (10.6, 12.7)                    | 30.3 (28.8, 31.9)                          | 1.37*** (1.19–1.56) |
| Island                   |                         |                         |                        |                         |                                      |                                            |                     |
| Java-Bali                | 78.6                    | 30.3 (28.9, 31.7)       | 44.7 (43.2, 16.2)      | 16.0 (15.0, 17.1)       | 9.0 (8.2, 9.9)                       | 25.1 (23.8, 26.4)                          | 1                   |
| Sumatra                  | 14.0                    | 30.6 (28.2, 33.1)       | 41.1 (38.5, 43.7)      | 19.1 (17.1, 21.2)       | 9.2 (7.8, 10.8)                      | 28.3 (26.0, 30.7)                          | 1.34*** (1.14–1.58) |
| Nusa Tenggara            | 2.4                     | 37.2 (32.9, 41.7)       | 47.2 (42.7, 51.7)      | 13.3 (10.5, 16.6)       | 2.3 (12.8, 4.1)                      | 15.6 (12.6, 19.1)                          | 0.62*** (0.46–0.83) |
| Kalimantan               | 2.4                     | 24.3 (19.7, 29.5)       | 41.5 (36.1, 47.2)      | 22.9 (18.6, 27.9)       | 11.3 (8.2, 15.3)                     | 34.2 (29.1, 39.7)                          | 2.02*** (1.53–2.67) |
| Sulawesi                 | 2.6                     | 33.6 (28.7, 38.9)       | 44.7 (39.4, 50.0)      | 14.2 (10.9, 18.4)       | 7.5 (5.2, 10.6)                      | 21.7 (17.7, 26.4)                          | 0.87 (0.64–1.18)    |
| Overall Sample           | 100                     | 30.4 (29.3, 31.6)       | 44.1 (42.9, 45.4)      | 16.5 (15.6, 17.4)       | 8.9 (8.2, 9.6)                       | 25.4 (24.3, 26.5)                          |                     |

<sup>a</sup> Weighted sample size  
<sup>b</sup> We defined multimorbidity if the respondents reported that they had 2 or more chronic conditions related to NCDs. Chronic diseases in IFLS5 included hypertension, diabetes mellitus, asthma, chronic heart diseases, mental health issue, stroke, liver diseases, cancer/malignancies, liver, arthritis, high cholesterol, prostate illness kidney diseases, digestive system diseases.  
aOR: adjusted odds ratio  
\*\*\* p<0.01, \*\* p<0.05

**Table S5. Robustness check: The effect of multimorbidity on health service use (cross-sectional analysis of 2014 IFLS)**

| Variables                             | Health service use        |                                  |                           |                                  |
|---------------------------------------|---------------------------|----------------------------------|---------------------------|----------------------------------|
|                                       | Outpatient                |                                  | Inpatient                 |                                  |
|                                       | Any visit<br>aOR (95% CI) | Number of visits<br>IRR (95% CI) | Any visit<br>aOR (95% CI) | Number of visits<br>IRR (95% CI) |
| Number of NCDs (ref. no NCD)          |                           |                                  |                           |                                  |
| Single NCD                            | 1.54*** (1.30–1.82)       | 1.50*** (1.24–1.81)              | 1.73** (1.17–2.56)        | 2.03*** (1.36–3.03)              |
| Two NCDs                              | 2.77*** (2.29–3.36)       | 2.68*** (2.15–3.34)              | 3.47*** (2.31–5.21)       | 4.03*** (2.66–6.08)              |
| Three or more NCDs                    | 4.51*** (3.61–5.63)       | 3.85*** (3.06–4.84)              | 6.85*** (4.45–10.52)      | 8.78*** (5.73–13.45)             |
| Sex (ref. Male)                       |                           |                                  |                           |                                  |
| Female                                | 1.26*** (1.09–1.45)       | 1.18** (1.02–1.35)               | 0.93 (0.72–1.22)          | 0.81 (0.62–1.07)                 |
| Age (ref. 50 – 60 years)              |                           |                                  |                           |                                  |
| 61 – 70 years                         | 1.01 (0.87–1.18)          | 0.93 (0.80–1.08)                 | 1.23 (0.91–1.65)          | 1.23 (0.88–1.72)                 |
| 71+ years                             | 1.03 (0.85–1.25)          | 1.01 (0.84–1.21)                 | 1.42 (1.02–2.00)          | 1.53** (1.01–2.32)               |
| Marital status (ref. Not married)     |                           |                                  |                           |                                  |
| Currently married                     | 1.09 (0.93–1.27)          | 1.04 (0.90–1.21)                 | 1.07 (0.80–1.41)          | 0.93 (0.70–1.25)                 |
| Educational level (ref. No education) |                           |                                  |                           |                                  |
| Primary                               | 0.94 (0.80–1.10)          | 0.87* (0.74–1.01)                | 1.02 (0.75–1.39)          | 0.96 (0.69–1.35)                 |
| Junior high school                    | 1.02 (0.80–1.31)          | 1.07 (0.76–1.52)                 | 0.72 (0.45–1.14)          | 0.82 (0.47–1.44)                 |
| Senior high school                    | 0.87 (0.68–1.10)          | 0.80* (0.64–1.00)                | 0.69 (0.44–1.08)          | 0.63* (0.39–1.00)                |
| Tertiary                              | 0.99 (0.73–1.33)          | 0.79 (0.55–1.13)                 | 0.58* (0.33–1.02)         | 0.55* (0.30–1.00)                |
| Ethnicity (ref. Javanese)             |                           |                                  |                           |                                  |
| Sundanese                             | 0.93 (0.77–1.13)          | 0.97 (0.81–1.17)                 | 1.17 (0.84–1.63)          | 1.21 (0.82–1.79)                 |
| Others                                | 1.06 (0.89–1.25)          | 0.99 (0.84–1.17)                 | 0.78 (0.56–1.08)          | 0.87 (0.62–1.22)                 |
| Insurance coverage (ref. No)          |                           |                                  |                           |                                  |
| Yes                                   | 1.20*** (1.06–1.37)       | 1.25*** (1.10–1.44)              | 2.28*** (1.77–2.95)       | 2.19*** (1.66–2.89)              |
| Type of work (ref. Unemployed)        |                           |                                  |                           |                                  |
| Casual                                | 0.73*** (0.59–0.90)       | 0.73*** (0.60–0.89)              | 0.41*** (0.25–0.67)       | 0.35*** (0.22–0.55)              |
| Self-employed                         | 0.77*** (0.66–0.90)       | 0.77*** (0.66–0.90)              | 0.64*** (0.47–0.87)       | 0.64*** (0.46–0.90)              |
| Government/private                    | 0.70*** (0.56–0.88)       | 0.75*** (0.60–0.93)              | 0.43*** (0.28–0.66)       | 0.53** (0.30–0.94)               |
| Per capita expenditure (ref. Q1)      |                           |                                  |                           |                                  |
| Q2                                    | 1.36*** (1.10–1.68)       | 1.40*** (1.14–1.73)              | 0.86 (0.57–1.31)          | 0.76 (0.48–1.18)                 |
| Q3                                    | 1.50*** (1.21–1.85)       | 1.71*** (1.35–2.17)              | 1.16 (0.78–1.72)          | 1.29 (0.80–2.05)                 |
| Q4                                    | 1.93*** (1.56–2.38)       | 1.75*** (1.44–2.14)              | 1.24 (0.83–1.85)          | 1.35 (0.87–2.08)                 |
| Q5                                    | 1.87*** (1.50–2.33)       | 2.02*** (1.63–2.51)              | 2.06*** (1.38–3.06)       | 1.98*** (1.32–2.96)              |
| Residency (ref. Rural)                |                           |                                  |                           |                                  |
| Urban                                 | 0.94 (0.82–1.08)          | 0.98 (0.86–1.13)                 | 0.93 (0.71–1.21)          | 1.03 (0.79–1.34)                 |
| Region (ref. Java-Bali)               |                           |                                  |                           |                                  |
| Sumatra                               | 0.72*** (0.60–0.86)       | 0.86 (0.72–1.03)                 | 1.32 (0.96–1.82)          | 1.46** (1.04–2.06)               |
| Nusa Tenggara                         | 0.84 (0.63–1.12)          | 0.84 (0.63–1.12)                 | 1.83** (1.09–3.06)        | 1.87** (1.08–3.25)               |
| Kalimantan                            | 0.81 (0.59–1.11)          | 0.85 (0.62–1.14)                 | 1.46 (0.82–2.58)          | 1.4 (0.81–2.42)                  |
| Sulawesi                              | 0.54*** (0.39–0.75)       | 0.53*** (0.39–0.71)              | 1.45 (0.81–2.60)          | 1.59 (0.85–2.98)                 |

Chronic diseases in IFLS5 included hypertension-diabetes mellitus-asthma-chronic heart diseases-mental health issue-stroke-liver diseases-cancer/malignancies-liver-arthritis-high cholesterol-prostate illness kidney diseases-digestive system diseases.

aOR: adjusted odds ratio, IRR: incidence rate ratio, NCD: noncommunicable disease

\*\*\* p<0.01, \*\* p<0.05



**Table S6. Robustness check: The effect of multimorbidity on catastrophic health expenditure (cross-sectional analysis of 2014 IFLS)**

| Variables                             | Catastrophic health expenditure    |                                    |                             |
|---------------------------------------|------------------------------------|------------------------------------|-----------------------------|
|                                       | 10% of total household expenditure | 25% of total household expenditure | 40% of non-food expenditure |
|                                       | aOR (95% CI)                       | aOR (95% CI)                       | aOR (95% CI)                |
| Number of NCDs (ref. no NCD)          |                                    |                                    |                             |
| Single NCD                            | 1.25 (0.94–1.66)                   | 1.18 (0.67–2.09)                   | 1.58 (0.98–2.57)            |
| Two NCDs                              | 2.03*** (1.48–2.79)                | 2.10** (1.12–3.93)                 | 2.39*** (1.38–4.14)         |
| Three or more NCDs                    | 2.24*** (1.57–3.20)                | 2.09** (1.06–4.12)                 | 2.17** (1.18–4.01)          |
| Sex (ref. Male)                       |                                    |                                    |                             |
| Female                                | 0.87 (0.68–1.12)                   | 0.74 (0.43–1.27)                   | 0.90 (0.59–1.37)            |
| Age (ref. 50 – 60 years)              |                                    |                                    |                             |
| 61 – 70 years                         | 1.24 (0.96–1.60)                   | 1.34 (0.82–2.20)                   | 1.42 (0.94–2.14)            |
| 71+ years                             | 1.32 (0.96–1.81)                   | 1.06 (0.53–2.13)                   | 1.48 (0.88–2.51)            |
| Marital status (ref. Not married)     |                                    |                                    |                             |
| Currently married                     | 1.44** (1.08–1.91)                 | 1.69* (0.91–3.17)                  | 1.94*** (1.20–3.14)         |
| Educational level (ref. No education) |                                    |                                    |                             |
| Primary                               | 1.14 (0.88–1.48)                   | 1.31 (0.79–2.17)                   | 1.46 (0.98–2.18)            |
| Junior high school                    | 1.11 (0.76–1.63)                   | 1.28 (0.67–2.46)                   | 1.12 (0.63–1.98)            |
| Senior high school                    | 0.73 (0.49–1.08)                   | 0.52 (0.22–1.23)                   | 0.45** (0.21–0.97)          |
| Tertiary                              | 0.74 (0.43–1.27)                   | 0.22 (0.05–1.01)                   | 0.12** (0.02–0.66)          |
| Ethnicity (ref. Javanese)             |                                    |                                    |                             |
| Sundanese                             | 0.87 (0.64–1.18)                   | 1.09 (0.62–1.89)                   | 0.83 (0.51–1.35)            |
| Others                                | 0.79 (0.60–1.04)                   | 0.65 (0.36–1.18)                   | 0.47*** (0.28–0.78)         |
| Insurance coverage (ref. No)          |                                    |                                    |                             |
| Yes                                   | 1 (0.81–1.25)                      | 1.07 (0.71–1.61)                   | 1.02 (0.72–1.44)            |
| Type of work (ref. Unemployed)        |                                    |                                    |                             |
| Casual                                | 0.66** (0.46–0.95)                 | 0.56 (0.27–1.16)                   | 0.56 (0.31–1.04)            |
| Self-employed                         | 0.70*** (0.53–0.91)                | 0.44*** (0.24–0.79)                | 0.54*** (0.34–0.85)         |
| Government/private                    | 0.57*** (0.39–0.83)                | 0.41** (0.19–0.88)                 | 0.46** (0.23–0.91)          |
| Per capita expenditure (ref. Q1)      |                                    |                                    |                             |
| Q2                                    | 0.96 (0.65–1.43)                   | 1.05 (0.47–2.35)                   | 1.24 (0.67–2.33)            |
| Q3                                    | 1.42 (0.99–2.02)                   | 1 (0.46–2.17)                      | 1.08 (0.58–2.01)            |
| Q4                                    | 1.59** (1.11–2.27)                 | 2.37** (1.15–4.86)                 | 2.18*** (1.21–3.92)         |
| Q5                                    | 2.53*** (1.76–3.62)                | 2.44** (1.18–5.05)                 | 2.75*** (1.51–5.02)         |
| Residency (ref. Rural)                |                                    |                                    |                             |
| Urban                                 | 1.01 (0.80–1.26)                   | 0.87 (0.56–1.37)                   | 0.94 (0.65–1.35)            |
| Region (ref. Java-Bali)               |                                    |                                    |                             |
| Sumatra                               | 0.94 (0.71–1.24)                   | 0.94 (0.55–1.60)                   | 1.36 (0.88–2.09)            |
| Nusa Tenggara                         | 0.81 (0.48–1.37)                   | 1.49 (0.59–3.76)                   | 1.57 (0.68–3.66)            |
| Kalimantan                            | 1.13 (0.69–1.84)                   | 1.5 (0.59–3.83)                    | 1.56 (0.71–3.47)            |
| Sulawesi                              | 1.02 (0.60–1.73)                   | 0.4 (0.08–2.07)                    | 1.18 (0.45–3.10)            |

Chronic diseases in IFLS5 included hypertension-diabetes mellitus-asthma-chronic heart diseases-mental health issue-stroke-liver diseases-cancer/malignancies-liver-arthritis-high cholesterol-prostate illness kidney diseases-digestive system diseases.

aOR: adjusted odds ratio, IRR: incidence rate ratio, NCD: noncommunicable disease

\*\*\* p<0.01, \*\* p<0.05

**Table S7. Robustness check: The effect of multimorbidity on productivity loss (cross-sectional analysis of 2014 IFLS)**

| Variables                         | Productivity loss                    |                                              |                                    |
|-----------------------------------|--------------------------------------|----------------------------------------------|------------------------------------|
|                                   | Labour participation<br>aOR (95% CI) | Days primary activity missed<br>IRR (95% CI) | Days stayed in bed<br>IRR (95% CI) |
| Number of NCDs (ref. no NCD)      |                                      |                                              |                                    |
| Single NCD                        | 0.76*** (0.65–0.89)                  | 1.48*** (1.29–1.70)                          | 1.32** (1.01–1.72)                 |
| Two NCDs                          | 0.54*** (0.45–0.65)                  | 2.42*** (2.09–2.80)                          | 2.18*** (1.60–2.97)                |
| Three or more NCDs                | 0.32*** (0.26–0.40)                  | 3.29*** (2.79–3.87)                          | 2.80*** (2.02–3.88)                |
| Sex (ref. Male)                   |                                      |                                              |                                    |
| Female                            | 0.31*** (0.27–0.35)                  | 1.05 (0.94–1.18)                             | 1.22 (0.97–1.54)                   |
| Age (ref. 50 – 60 years)          |                                      |                                              |                                    |
| 61 – 70 years                     | 0.40*** (0.34–0.46)                  | 0.97 (0.86–1.10)                             | 0.93 (0.72–1.21)                   |
| 71+ years                         | 0.15*** (0.13–0.18)                  | 1.19** (1.03–1.37)                           | 1.78*** (1.33–2.36)                |
| Marital status (ref. Not married) |                                      |                                              |                                    |
| Currently married                 | 1.22*** (1.05–1.41)                  | 1.07 (0.95–1.20)                             | 0.93 (0.72–1.21)                   |
| Primary                           | 1.08 (0.92–1.26)                     | 1.02 (0.90–1.17)                             | 1.03 (0.81–1.32)                   |
| Junior high school                | 0.64*** (0.51–0.81)                  | 1.02 (0.85–1.22)                             | 1.01 (0.64–1.61)                   |
| Senior high school                | 0.61*** (0.49–0.76)                  | 0.73*** (0.60–0.89)                          | 0.73 (0.46–1.15)                   |
| Tertiary                          | 1.09 (0.79–1.48)                     | 0.59*** (0.43–0.83)                          | 0.37*** (0.19–0.71)                |
| Ethnicity (ref. Javanese)         |                                      |                                              |                                    |
| Sundanese                         | 0.69*** (0.57–0.83)                  | 1.25*** (1.10–1.43)                          | 1.70*** (1.29–2.24)                |
| Others                            | 0.72*** (0.61–0.86)                  | 0.93 (0.81–1.07)                             | 1.34** (1.01–1.77)                 |
| Insurance coverage (ref. No)      |                                      |                                              |                                    |
| Yes                               | 0.91 (0.80–1.04)                     | 1.02 (0.92–1.13)                             | 0.87 (0.71–1.06)                   |
| Type of work (ref. Unemployed)    |                                      |                                              |                                    |
| Casual                            |                                      | 0.51*** (0.43–0.60)                          | 0.28*** (0.20–0.39)                |
| Self-employed                     |                                      | 0.55*** (0.49–0.63)                          | 0.33*** (0.26–0.42)                |
| Government/private                | n/a                                  | 0.44*** (0.37–0.54)                          | 0.22*** (0.14–0.33)                |
| Per capita expenditure (ref. Q1)  |                                      |                                              |                                    |
| Q2                                | 1.25** (1.03–1.52)                   | 1.02 (0.88–1.19)                             | 1.11 (0.82–1.51)                   |
| Q3                                | 1.17 (0.96–1.43)                     | 1.12 (0.95–1.32)                             | 0.8 (0.59–1.09)                    |
| Q4                                | 0.96 (0.79–1.17)                     | 0.95 (0.81–1.12)                             | 0.89 (0.66–1.21)                   |
| Q5                                | 1.07 (0.86–1.32)                     | 1.02 (0.86–1.20)                             | 0.83 (0.61–1.14)                   |
| Residency (ref. Rural)            |                                      |                                              |                                    |
| Urban                             | 0.57*** (0.50–0.65)                  | 1 (0.90–1.12)                                | 0.88 (0.72–1.09)                   |
| Region (ref. Java-Bali)           |                                      |                                              |                                    |
| Sumatra                           | 1.04 (0.87–1.23)                     | 1.12 (0.97–1.29)                             | 1.03 (0.78–1.36)                   |
| Nusa Tenggara                     | 1.17 (0.89–1.54)                     | 1.14 (0.92–1.42)                             | 0.91 (0.59–1.40)                   |
| Kalimantan                        | 1.42** (1.02–1.99)                   | 1.16 (0.91–1.48)                             | 0.73 (0.48–1.10)                   |
| Sulawesi                          | 0.59*** (0.43–0.79)                  | 1.39** (1.07–1.81)                           | 1.05 (0.70–1.59)                   |

Chronic diseases in IFLS5 included hypertension-diabetes mellitus-asthma-chronic heart diseases-mental health issue-stroke-liver diseases-cancer/malignancies-liver-arthritis-high cholesterol-prostate illness kidney diseases-digestive system diseases.

aOR: adjusted odds ratio, IRR: incidence rate ratio, NCD: noncommunicable disease

\*\*\* p<0.01, \*\* p<0.05

**Table S8. Sensitivity analysis: the effect of multimorbidity on health service use**  
Obesity (BMI  $\geq 25$  kg/m<sup>2</sup> as obese) is included in the clustering of multimorbidity

| Variables                                  | Health service use      |              |                                |              |                         |              |                                |       |
|--------------------------------------------|-------------------------|--------------|--------------------------------|--------------|-------------------------|--------------|--------------------------------|-------|
|                                            | Outpatient              |              |                                |              | Inpatient               |              |                                |       |
|                                            | Any visit <sup>a)</sup> |              | Number of visits <sup>b)</sup> |              | Any visit <sup>a)</sup> |              | Number of visits <sup>b)</sup> |       |
| aOR (95% CI)                               | p values                | IRR (95% CI) | p values                       | aOR (95% CI) | p values                | IRR (95% CI) | p values                       |       |
| Number of NCDs (ref. no NCD)               |                         |              |                                |              |                         |              |                                |       |
| Single NCD                                 | 1.18 (0.98–1.43)        | 0.086        | 1.24 (1.04–1.50)               | 0.020        | 1.16 (0.79–1.70)        | 0.451        | 1.16 (0.79–1.70)               | 0.488 |
| Two NCDs                                   | 1.82 (1.47–2.25)        | 0.000        | 1.83 (1.50–2.25)               | 0.000        | 1.78 (1.18–2.69)        | 0.006        | 1.78 (1.18–2.69)               | 0.002 |
| Three or more NCDs                         | 3.27 (2.55–4.19)        | 0.000        | 2.85 (2.26–3.60)               | 0.000        | 2.73 (1.76–4.25)        | 0.000        | 2.73 (1.76–4.25)               | 0.000 |
| Period (ref.2007)                          |                         |              |                                |              |                         |              |                                |       |
| 2014                                       | 1.33 (1.15–1.53)        | 0.000        | 1.29 (1.12–1.49)               | 0.000        | 1.72 (1.29–2.29)        | 0.000        | 1.72 (1.29–2.29)               | 0.000 |
| Sex (ref. Male)                            |                         |              |                                |              |                         |              |                                |       |
| Female                                     | 1.19 (1.00–1.41)        | 0.049        | 1.13 (0.96–1.33)               | 0.139        | 0.91 (0.67–1.24)        | 0.537        | 0.91 (0.67–1.24)               | 0.413 |
| Age (ref. 50 – 60 years)                   |                         |              |                                |              |                         |              |                                |       |
| 61 – 70 years                              | 1.06 (0.90–1.26)        | 0.475        | 1.05 (0.89–1.23)               | 0.588        | 1.09 (0.79–1.50)        | 0.603        | 1.09 (0.79–1.50)               | 0.332 |
| 71+ years                                  | 1.20 (0.96–1.50)        | 0.109        | 1.15 (0.93–1.41)               | 0.187        | 1.58 (1.07–2.33)        | 0.020        | 1.58 (1.07–2.33)               | 0.020 |
| Marital status (ref. Not married)          |                         |              |                                |              |                         |              |                                |       |
| Currently married                          | 1.09 (0.92–1.31)        | 0.323        | 1.15 (0.97–1.36)               | 0.105        | 1.05 (0.77–1.44)        | 0.742        | 1.05 (0.77–1.44)               | 0.962 |
| Educational level (ref. No education)      |                         |              |                                |              |                         |              |                                |       |
| Primary                                    | 1.06 (0.88–1.27)        | 0.556        | 0.97 (0.82–1.16)               | 0.760        | 1.09 (0.78–1.51)        | 0.630        | 1.09 (0.78–1.51)               | 0.796 |
| Junior high school                         | 1.04 (0.78–1.40)        | 0.777        | 1.11 (0.85–1.46)               | 0.441        | 1.18 (0.73–1.92)        | 0.498        | 1.18 (0.73–1.92)               | 0.105 |
| Senior high school                         | 1.01 (0.76–1.35)        | 0.954        | 0.94 (0.72–1.23)               | 0.636        | 0.78 (0.47–1.29)        | 0.335        | 0.78 (0.47–1.29)               | 0.147 |
| Tertiary                                   | 1.18 (0.79–1.76)        | 0.427        | 0.84 (0.57–1.23)               | 0.371        | 0.94 (0.50–1.78)        | 0.858        | 0.94 (0.50–1.78)               | 0.495 |
| Ethnicity (ref. Javanese)                  |                         |              |                                |              |                         |              |                                |       |
| Sundanese                                  | 0.91 (0.72–1.16)        | 0.456        | 0.92 (0.74–1.15)               | 0.486        | 0.90 (0.59–1.37)        | 0.628        | 0.90 (0.59–1.37)               | 0.944 |
| Others                                     | 1.02 (0.85–1.24)        | 0.802        | 0.92 (0.77–1.09)               | 0.313        | 0.91 (0.65–1.28)        | 0.603        | 0.91 (0.65–1.28)               | 0.557 |
| Insurance coverage (ref. No)               |                         |              |                                |              |                         |              |                                |       |
| Yes                                        | 1.48 (1.27–1.73)        | 0.000        | 1.57 (1.36–1.81)               | 0.000        | 2.02 (1.52–2.69)        | 0.000        | 2.02 (1.52–2.69)               | 0.000 |
| Type of work (ref. Unemployed)             |                         |              |                                |              |                         |              |                                |       |
| Casual                                     | 0.77 (0.61–0.97)        | 0.025        | 0.66 (0.53–0.82)               | 0.000        | 0.48 (0.30–0.79)        | 0.003        | 0.48 (0.30–0.79)               | 0.001 |
| Self-employed                              | 0.83 (0.70–0.99)        | 0.041        | 0.76 (0.64–0.89)               | 0.001        | 0.60 (0.43–0.83)        | 0.002        | 0.60 (0.43–0.83)               | 0.001 |
| Government/private                         | 0.74 (0.56–0.98)        | 0.034        | 0.67 (0.52–0.88)               | 0.004        | 0.61 (0.36–1.02)        | 0.061        | 0.61 (0.36–1.02)               | 0.242 |
| Per capita household expenditure (ref. Q1) |                         |              |                                |              |                         |              |                                |       |
| Q2                                         | 1.48 (1.17–1.86)        | 0.001        | 1.50 (1.20–1.87)               | 0.000        | 1.26 (0.80–2.01)        | 0.322        | 1.26 (0.80–2.01)               | 0.500 |
| Q3                                         | 1.71 (1.35–2.15)        | 0.000        | 1.74 (1.39–2.17)               | 0.000        | 1.77 (1.14–2.76)        | 0.012        | 1.77 (1.14–2.76)               | 0.003 |
| Q4                                         | 1.70 (1.34–2.16)        | 0.000        | 1.77 (1.41–2.22)               | 0.000        | 1.44 (0.90–2.31)        | 0.131        | 1.44 (0.90–2.31)               | 0.092 |
| Q5                                         | 1.79 (1.39–2.31)        | 0.000        | 1.98 (1.56–2.51)               | 0.000        | 2.67 (1.68–4.26)        | 0.000        | 2.67 (1.68–4.26)               | 0.000 |
| Residency (ref. Rural)                     |                         |              |                                |              |                         |              |                                |       |
| Urban                                      | 0.87 (0.74–1.02)        | 0.093        | 0.92 (0.79–1.07)               | 0.258        | 0.96 (0.72–1.28)        | 0.775        | 0.96 (0.72–1.28)               | 0.689 |
| Region (ref. Java-Bali)                    |                         |              |                                |              |                         |              |                                |       |
| Sumatra                                    | 0.83 (0.67–1.03)        | 0.094        | 1.03 (0.85–1.26)               | 0.736        | 1.21 (0.84–1.75)        | 0.294        | 1.21 (0.84–1.75)               | 0.322 |
| Nusa Tenggara                              | 0.69 (0.48–0.99)        | 0.043        | 0.62 (0.44–0.87)               | 0.006        | 1.24 (0.69–2.22)        | 0.467        | 1.24 (0.69–2.22)               | 0.707 |
| Kalimantan                                 | 1.04 (0.71–1.50)        | 0.851        | 1.31 (0.94–1.83)               | 0.115        | 0.99 (0.50–1.97)        | 0.982        | 0.99 (0.50–1.97)               | 0.764 |
| Sulawesi                                   | 0.72 (0.48–1.07)        | 0.107        | 0.68 (0.47–0.99)               | 0.043        | 0.52 (0.22–1.22)        | 0.134        | 0.52 (0.22–1.22)               | 0.055 |

<sup>a)</sup> Multilevel logistic regression model

<sup>b)</sup> Multilevel negative binomial regression model

Obesity (BMI  $\geq 25$  kg/m<sup>2</sup> as obese) is included in the clustering of multimorbidity

aOR: adjusted odds ratio, IRR: Incidence rate ratio, NCD: noncommunicable disease

**Table S9. Sensitivity analysis: the effect of multimorbidity on catastrophic expenditure**  
Obesity (BMI  $\geq 25$  kg/m<sup>2</sup> as obese) is included in the clustering of multimorbidity

| Variables                                  | Catastrophic health expenditure                  |          |                                                  |          |                                           |          |
|--------------------------------------------|--------------------------------------------------|----------|--------------------------------------------------|----------|-------------------------------------------|----------|
|                                            | 10% of total household expenditure <sup>a)</sup> |          | 25% of total household expenditure <sup>a)</sup> |          | 40% of non-food expenditure <sup>a)</sup> |          |
|                                            | aOR (95% CI)                                     | p values | aOR (95% CI)                                     | p values | aOR (95% CI)                              | p values |
| Number of NCDs (ref. no NCD)               |                                                  |          |                                                  |          |                                           |          |
| Single NCD                                 | 1.12 (0.84–1.51)                                 | 0.434    | 0.89 (0.54–1.47)                                 | 0.642    | 0.93 (0.62–1.41)                          | 0.743    |
| Two NCDs                                   | 1.23 (0.88–1.72)                                 | 0.235    | 1.27 (0.74–2.17)                                 | 0.382    | 1.22 (0.77–1.91)                          | 0.396    |
| Three or more NCDs                         | 1.66 (1.12–2.45)                                 | 0.011    | 0.99 (0.50–1.94)                                 | 0.976    | 1.08 (0.63–1.88)                          | 0.773    |
| Period (ref.2007)                          |                                                  |          |                                                  |          |                                           |          |
| 2014                                       | 1.37 (1.09–1.74)                                 | 0.008    | 1.21 (0.81–1.81)                                 | 0.351    | 1.16 (0.84–1.62)                          | 0.367    |
| Sex (ref. Male)                            |                                                  |          |                                                  |          |                                           |          |
| Female                                     | 0.92 (0.72–1.19)                                 | 0.528    | 1.00 (0.64–1.54)                                 | 0.991    | 1.01 (0.70–1.45)                          | 0.949    |
| Age (ref. 50 – 60 years)                   |                                                  |          |                                                  |          |                                           |          |
| 61 – 70 years                              | 1.18 (0.91–1.53)                                 | 0.207    | 1.47 (0.95–2.29)                                 | 0.085    | 1.49 (1.03–2.16)                          | 0.033    |
| 71+ years                                  | 1.08 (0.77–1.53)                                 | 0.651    | 0.87 (0.45–1.67)                                 | 0.672    | 1.37 (0.83–2.25)                          | 0.218    |
| Marital status (ref. Not married)          |                                                  |          |                                                  |          |                                           |          |
| Currently married                          | 1.54 (1.15–2.05)                                 | 0.003    | 1.66 (1.01–2.71)                                 | 0.044    | 1.82 (1.21–2.72)                          | 0.004    |
| Educational level (ref. No education)      |                                                  |          |                                                  |          |                                           |          |
| Primary                                    | 0.93 (0.70–1.23)                                 | 0.607    | 0.87 (0.53–1.44)                                 | 0.596    | 0.88 (0.59–1.31)                          | 0.530    |
| Junior high school                         | 0.88 (0.57–1.35)                                 | 0.555    | 1.04 (0.51–2.09)                                 | 0.921    | 0.67 (0.35–1.28)                          | 0.227    |
| Senior high school                         | 0.85 (0.55–1.29)                                 | 0.442    | 1.05 (0.53–2.07)                                 | 0.885    | 0.82 (0.45–1.47)                          | 0.500    |
| Tertiary                                   | 0.39 (0.18–0.84)                                 | 0.016    | 0.13 (0.02–0.96)                                 | 0.045    | 0.18 (0.04–0.75)                          | 0.018    |
| Ethnicity (ref. Javanese)                  |                                                  |          |                                                  |          |                                           |          |
| Sundanese                                  | 0.83 (0.57–1.21)                                 | 0.339    | 1.64 (0.91–2.95)                                 | 0.099    | 1.17 (0.71–1.94)                          | 0.529    |
| Others                                     | 0.75 (0.56–1.02)                                 | 0.069    | 0.96 (0.57–1.60)                                 | 0.872    | 0.72 (0.47–1.10)                          | 0.129    |
| Insurance coverage (ref. No)               |                                                  |          |                                                  |          |                                           |          |
| Yes                                        | 0.94 (0.74–1.20)                                 | 0.613    | 0.83 (0.54–1.27)                                 | 0.388    | 0.80 (0.56–1.15)                          | 0.227    |
| Type of work (ref. Unemployed)             |                                                  |          |                                                  |          |                                           |          |
| Casual                                     | 0.62 (0.42–0.91)                                 | 0.016    | 0.59 (0.31–1.14)                                 | 0.116    | 0.56 (0.33–0.95)                          | 0.032    |
| Self-employed                              | 0.64 (0.47–0.87)                                 | 0.005    | 0.65 (0.41–1.03)                                 | 0.068    | 0.66 (0.45–0.97)                          | 0.033    |
| Government/private                         | 0.61 (0.38–0.97)                                 | 0.038    | 0.77 (0.37–1.61)                                 | 0.488    | 0.63 (0.33–1.22)                          | 0.169    |
| Per capita household expenditure (ref. Q1) |                                                  |          |                                                  |          |                                           |          |
| Q2                                         | 1.11 (0.74–1.65)                                 | 0.619    | 1.40 (0.66–2.94)                                 | 0.379    | 1.54 (0.85–2.77)                          | 0.151    |
| Q3                                         | 1.46 (0.99–2.15)                                 | 0.058    | 1.74 (0.85–3.58)                                 | 0.130    | 1.67 (0.93–2.99)                          | 0.086    |
| Q4                                         | 2.01 (1.34–3.01)                                 | 0.001    | 2.58 (1.27–5.26)                                 | 0.009    | 2.42 (1.36–4.31)                          | 0.003    |
| Q5                                         | 3.27 (2.10–5.11)                                 | 0.000    | 4.64 (2.29–9.38)                                 | 0.000    | 4.71 (2.66–8.34)                          | 0.000    |
| Residency (ref. Rural)                     |                                                  |          |                                                  |          |                                           |          |
| Urban                                      | 0.99 (0.74–1.31)                                 | 0.936    | 0.85 (0.52–1.40)                                 | 0.526    | 0.88 (0.59–1.32)                          | 0.550    |
| Region (ref. Java-Bali)                    |                                                  |          |                                                  |          |                                           |          |
| Sumatra                                    | 0.82 (0.58–1.16)                                 | 0.257    | 0.78 (0.43–1.41)                                 | 0.411    | 1.12 (0.70–1.78)                          | 0.633    |
| Nusa Tenggara                              | 0.70 (0.37–1.35)                                 | 0.287    | 1.22 (0.39–3.77)                                 | 0.730    | 0.87 (0.33–2.29)                          | 0.772    |
| Kalimantan                                 | 0.86 (0.46–1.59)                                 | 0.632    | 0.77 (0.26–2.30)                                 | 0.637    | 0.96 (0.40–2.26)                          | 0.918    |
| Sulawesi                                   | 0.83 (0.43–1.61)                                 | 0.584    | 1.00 (0.36–2.79)                                 | 0.994    | 1.08 (0.44–2.63)                          | 0.864    |

<sup>a)</sup> Multilevel logistic regression model

Obesity (BMI  $\geq 25$  kg/m<sup>2</sup> as obese) is included in the clustering of multimorbidity

aOR: adjusted odds ratio, NCD: noncommunicable disease

**Table S10. Sensitivity analysis: the effect of multimorbidity on productivity loss**Obesity (BMI  $\geq 25$  kg/m<sup>2</sup> as obese) is included in the clustering of multimorbidity

| Variables                                  | Productivity loss                  |          |                                            |          |                                  |          |
|--------------------------------------------|------------------------------------|----------|--------------------------------------------|----------|----------------------------------|----------|
|                                            | Labour participation <sup>a)</sup> |          | Days primary activity missed <sup>b)</sup> |          | Days stayed in bed <sup>b)</sup> |          |
|                                            | aOR (95% CI)                       | p values | IRR (95% CI)                               | p values | IRR (95% CI)                     | p values |
| Number of NCDs (ref. no NCD)               |                                    |          |                                            |          |                                  |          |
| Single NCD                                 | 0.66 (0.54–0.82)                   | 0.000    | 1.16 (0.99–1.36)                           | 0.063    | 1.10 (0.82–1.48)                 | 0.533    |
| Two NCDs                                   | 0.45 (0.35–0.58)                   | 0.000    | 1.70 (1.41–2.04)                           | 0.000    | 1.37 (0.98–1.92)                 | 0.065    |
| Three or more NCDs                         | 0.37 (0.27–0.49)                   | 0.000    | 2.21 (1.76–2.76)                           | 0.000    | 2.16 (1.44–3.25)                 | 0.000    |
| Period (ref. 2007)                         |                                    |          |                                            |          |                                  |          |
| 2014                                       | 0.76 (0.65–0.89)                   | 0.001    | 1.54 (1.35–1.75)                           | 0.000    | 1.44 (1.13–1.85)                 | 0.004    |
| Sex (ref. Male)                            |                                    |          |                                            |          |                                  |          |
| Female                                     | 0.22 (0.17–0.27)                   | 0.000    | 0.96 (0.83–1.11)                           | 0.555    | 0.90 (0.68–1.20)                 | 0.480    |
| Age (ref. 50 – 60 years)                   |                                    |          |                                            |          |                                  |          |
| 61 – 70 years                              | 0.36 (0.29–0.44)                   | 0.000    | 1.02 (0.89–1.18)                           | 0.758    | 1.15 (0.87–1.52)                 | 0.336    |
| 71+ years                                  | 0.10 (0.08–0.13)                   | 0.000    | 1.17 (0.97–1.41)                           | 0.094    | 1.77 (1.24–2.52)                 | 0.002    |
| Marital status (ref. Not married)          |                                    |          |                                            |          |                                  |          |
| Currently married                          | 1.49 (1.22–1.82)                   | <0.0001  | 1.18 (1.01–1.37)                           | 0.032    | 0.96 (0.72–1.29)                 | 0.809    |
| Educational level (ref. No education)      |                                    |          |                                            |          |                                  |          |
| Primary                                    | 0.90 (0.72–1.13)                   | 0.372    | 0.92 (0.79–1.07)                           | 0.269    | 1.03 (0.77–1.38)                 | 0.851    |
| Junior high school                         | 0.41 (0.29–0.58)                   | <0.0001  | 0.91 (0.71–1.16)                           | 0.438    | 0.68 (0.42–1.10)                 | 0.118    |
| Senior high school                         | 0.43 (0.30–0.61)                   | <0.0001  | 0.64 (0.50–0.83)                           | 0.001    | 0.65 (0.40–1.04)                 | 0.073    |
| Tertiary                                   | 0.56 (0.34–0.92)                   | 0.021    | 0.52 (0.36–0.75)                           | <0.0001  | 0.42 (0.20–0.88)                 | 0.022    |
| Ethnicity (ref. Javanese)                  |                                    |          |                                            |          |                                  |          |
| Sundanese                                  | 0.48 (0.36–0.65)                   | <0.0001  | 1.39 (1.14–1.70)                           | 0.001    | 1.51 (1.03–2.21)                 | 0.035    |
| Others                                     | 0.80 (0.63–1.01)                   | 0.059    | 1.13 (0.97–1.33)                           | 0.123    | 1.13 (0.84–1.53)                 | 0.425    |
| Insurance coverage (ref. No)               |                                    |          |                                            |          |                                  |          |
| Yes                                        | 0.82 (0.69–0.98)                   | 0.032    | 1.13 (0.99–1.29)                           | 0.077    | 1.13 (0.88–1.46)                 | 0.329    |
| Type of work (ref. Unemployed)             |                                    |          |                                            |          |                                  |          |
| Casual                                     | N/A                                | N/A      | 0.69 (0.57–0.84)                           | <0.0001  | 0.41 (0.28–0.60)                 | <0.0001  |
| Self-employed                              | N/A                                | N/A      | 0.68 (0.58–0.79)                           | <0.0001  | 0.51 (0.38–0.69)                 | <0.0001  |
| Government/private                         | N/A                                | N/A      | 0.60 (0.47–0.76)                           | <0.0001  | 0.56 (0.35–0.90)                 | 0.017    |
| Per capita household expenditure (ref. Q1) |                                    |          |                                            |          |                                  |          |
| Q2                                         | 1.36 (1.06–1.75)                   | 0.016    | 1.03 (0.85–1.24)                           | 0.769    | 0.97 (0.68–1.38)                 | 0.848    |
| Q3                                         | 1.27 (0.98–1.64)                   | 0.071    | 1.17 (0.97–1.42)                           | 0.095    | 1.11 (0.78–1.59)                 | 0.557    |
| Q4                                         | 1.13 (0.86–1.47)                   | 0.383    | 1.05 (0.86–1.29)                           | 0.602    | 0.99 (0.68–1.43)                 | 0.944    |
| Q5                                         | 1.35 (1.01–1.80)                   | 0.043    | 1.26 (1.02–1.55)                           | 0.032    | 0.89 (0.60–1.33)                 | 0.577    |
| Residency (ref. Rural)                     |                                    |          |                                            |          |                                  |          |
| Urban                                      | 0.42 (0.34–0.52)                   | <0.0001  | 0.92 (0.80–1.06)                           | 0.239    | 0.69 (0.52–0.90)                 | 0.006    |
| Region (ref. Java-Bali)                    |                                    |          |                                            |          |                                  |          |
| Sumatra                                    | 0.91 (0.70–1.20)                   | 0.519    | 1.14 (0.95–1.38)                           | 0.162    | 1.10 (0.78–1.55)                 | 0.573    |
| Nusa Tenggara                              | 0.68 (0.44–1.04)                   | 0.077    | 0.86 (0.64–1.15)                           | 0.309    | 1.15 (0.66–2.00)                 | 0.629    |
| Kalimantan                                 | 1.22 (0.75–1.99)                   | 0.418    | 0.86 (0.63–1.17)                           | 0.329    | 0.92 (0.51–1.67)                 | 0.794    |
| Sulawesi                                   | 0.34 (0.21–0.55)                   | <0.0001  | 1.05 (0.76–1.46)                           | 0.754    | 1.07 (0.58–1.98)                 | 0.826    |

<sup>a)</sup> Multilevel logistic regression model<sup>b)</sup> Multilevel negative binomial regression model

aOR: adjusted odds ratio, IRR: incidence rate ratio, NCD: noncommunicable disease

## STROBE Statement

|                           | Item | Recommendation                                                                                                                                                                                                                                                                                                                                                                                                                                                                 | Reported on page | Relevant text from manuscript                                                                                                                                                         |
|---------------------------|------|--------------------------------------------------------------------------------------------------------------------------------------------------------------------------------------------------------------------------------------------------------------------------------------------------------------------------------------------------------------------------------------------------------------------------------------------------------------------------------|------------------|---------------------------------------------------------------------------------------------------------------------------------------------------------------------------------------|
| <b>Title and abstract</b> | 1    | (a) Indicate the study's design with a commonly used term in the title or the abstract                                                                                                                                                                                                                                                                                                                                                                                         | 1                | "Panel Data Analysis"                                                                                                                                                                 |
|                           |      | (b) Provide in the abstract an informative and balanced summary of what was done and what was found                                                                                                                                                                                                                                                                                                                                                                            | 2                | "Multimorbidity is associated with substantial direct and indirect costs to individuals, households, and the wider society."                                                          |
| <b>Introduction</b>       |      |                                                                                                                                                                                                                                                                                                                                                                                                                                                                                |                  |                                                                                                                                                                                       |
| Background d/rationale    | 2    | Explain the scientific background and rationale for the investigation being reported                                                                                                                                                                                                                                                                                                                                                                                           | 6                | "Evidence from high-income countries (HICs) has found that..."                                                                                                                        |
| Objectives                | 3    | State specific objectives, including any prespecified hypotheses                                                                                                                                                                                                                                                                                                                                                                                                               | 6                | "to examine NCD multimorbidity levels, and their relation to households' socioeconomic characteristics, health service use, catastrophic health expenditures, and productivity loss." |
| <b>Methods</b>            |      |                                                                                                                                                                                                                                                                                                                                                                                                                                                                                |                  |                                                                                                                                                                                       |
| Study design              | 4    | Present key elements of study design early in the paper                                                                                                                                                                                                                                                                                                                                                                                                                        | 7                | "We utilised panel data from two waves of the Indonesian Family Life Survey (IFLS)."                                                                                                  |
| Setting                   | 5    | Describe the setting, locations, and relevant dates, including periods of recruitment, exposure, follow-up, and data collection                                                                                                                                                                                                                                                                                                                                                | 7                | "Waves 5 was conducted between September 2014–March 2015."                                                                                                                            |
| Participants              | 6    | (a) <i>Cohort study</i> —Give the eligibility criteria, and the sources and methods of selection of participants. Describe methods of follow-up<br>(b) <i>Case-control study</i> —Give the eligibility criteria, and the sources and methods of case ascertainment and control selection. Give the rationale for the choice of cases and controls<br>(c) <i>Cross-sectional study</i> —Give the eligibility criteria, and the sources and methods of selection of participants | 7                | "This study included respondents aged 50 years and above in 2007 who participated in both Waves 4 and 5, and excluded those with missing values for the study variable."              |
| Variables                 | 7    | Clearly define all outcomes, exposures, predictors, potential confounders, and effect modifiers. Give diagnostic criteria, if applicable                                                                                                                                                                                                                                                                                                                                       | 7–8              | In "variables" subsection.                                                                                                                                                            |
| Data sources/ measurement | 8*   | For each variable of interest, give sources of data and details of methods of assessment (measurement). Describe comparability of assessment methods if there is more than one group                                                                                                                                                                                                                                                                                           | 7–8              | In "variables" subsection. Details of the measurements are available in Table S1                                                                                                      |

|                | Item                   | Recommendation                                                                                                                                                                                                                                                                                            | Reported on page       | Relevant text from manuscript                                                                                                                                                                                              |
|----------------|------------------------|-----------------------------------------------------------------------------------------------------------------------------------------------------------------------------------------------------------------------------------------------------------------------------------------------------------|------------------------|----------------------------------------------------------------------------------------------------------------------------------------------------------------------------------------------------------------------------|
|                | Bias                   | 9 Describe any efforts to address potential sources of bias                                                                                                                                                                                                                                               | 11                     | “Taking into account the hierarchical (nested) nature of the dataset (i.e. observations nested within individuals, and individuals nested within households, and districts), a multilevel level model approach was used.”  |
|                | Study size             | 10 Explain how the study size was arrived at                                                                                                                                                                                                                                                              | 7                      | Our final sample is 3,678 respondents (the sample flowchart is presented in Figure S1).                                                                                                                                    |
|                | Quantitative variables | 11 Explain how quantitative variables were handled in the analyses. If applicable, describe which groupings were chosen and why                                                                                                                                                                           | 7                      | In “variables” subsection, i.e. “A total of 10 NCDs were used to quantify the number of NCDs (0, 1, 2, 3 or more) and respondents with two or more NCDs were categorised as having multimorbidity (categorised as 0 or 1)” |
|                | Statistical methods    | 12 (a) Describe all statistical methods, including those used to control for confounding                                                                                                                                                                                                                  | 11                     | In “statistical analysis” subsection. For example “..., adjusting for covariates”                                                                                                                                          |
|                |                        | (b) Describe any methods used to examine subgroups and interactions                                                                                                                                                                                                                                       | 11                     | “We described the patterns of multimorbidity across different population subgroups...”                                                                                                                                     |
|                |                        | (c) Explain how missing data were addressed                                                                                                                                                                                                                                                               | 7                      | “...excluded those who did not participate in both Waves 4 and 5, and those with missing values for the study”                                                                                                             |
|                |                        | (d) <i>Cohort study</i> —If applicable, explain how loss to follow-up was addressed<br><i>Case-control study</i> —If applicable, explain how matching of cases and controls was addressed<br><i>Cross-sectional study</i> —If applicable, describe analytical methods taking account of sampling strategy | 11                     | “The results of the descriptive analysis were presented as numbers and weighted percentages with their 95% confidence interval (CI). ...”                                                                                  |
|                |                        | (e) Describe any sensitivity analyses                                                                                                                                                                                                                                                                     | 11                     | “We conducted two robustness analyses.”                                                                                                                                                                                    |
| <b>Results</b> |                        |                                                                                                                                                                                                                                                                                                           |                        |                                                                                                                                                                                                                            |
|                | Participants           | 13* (a) Report numbers of individuals at each stage of study—eg numbers potentially eligible, examined for eligibility, confirmed eligible, included in the study, completing follow-up, and analysed                                                                                                     | 1 (supplementary file) | Figure S1: Sampling flow chart                                                                                                                                                                                             |



|                   | <b>Item</b> | <b>Recommendation</b>                                                                                                                                                                                        | <b>Reported on page</b>   | <b>Relevant text from manuscript</b>                                                                                                                                                                            |
|-------------------|-------------|--------------------------------------------------------------------------------------------------------------------------------------------------------------------------------------------------------------|---------------------------|-----------------------------------------------------------------------------------------------------------------------------------------------------------------------------------------------------------------|
|                   |             | (b) Give reasons for non-participation at each stage                                                                                                                                                         | 1 (supplementary file)    | Figure S1: Sampling flow chart                                                                                                                                                                                  |
|                   |             | (c) Consider use of a flow diagram                                                                                                                                                                           | 1 (supplementary file)    | Figure S1: Sampling flow chart                                                                                                                                                                                  |
| Descriptive data  | 14*         | (a) Give characteristics of study participants (eg demographic, clinical, social) and information on exposures and potential confounders                                                                     | 1 (supplementary file)    | Figure S1: Sampling flow chart                                                                                                                                                                                  |
|                   |             | (b) Indicate number of participants with missing data for each variable of interest                                                                                                                          | 1 (supplementary file)    | Figure S1: Sampling flow chart                                                                                                                                                                                  |
|                   |             | (c) <i>Cohort study</i> —Summarise follow-up time (eg, average and total amount)                                                                                                                             |                           | N/A                                                                                                                                                                                                             |
| Outcome data      | 15*         | <i>Cohort study</i> —Report numbers of outcome events or summary measures over time                                                                                                                          |                           | N/A                                                                                                                                                                                                             |
|                   |             | <i>Case-control study</i> —Report numbers in each exposure category, or summary measures of exposure                                                                                                         |                           | N/A                                                                                                                                                                                                             |
|                   |             | <i>Cross-sectional study</i> —Report numbers of outcome events or summary measures                                                                                                                           | 25–26                     | Table 1 and Table 2                                                                                                                                                                                             |
| Main results      | 16          | (a) Give unadjusted estimates and, if applicable, confounder-adjusted estimates and their precision (eg, 95% confidence interval). Make clear which confounders were adjusted for and why they were included | 18–21                     | Table 2 – Table 5. For example, “Respondents with a single NCD were 1.61 times more likely (95% CI 1.21–2.14) to have experienced an outpatient visit in the past four weeks compared to those without an NCD.” |
|                   |             | (b) Report category boundaries when continuous variables were categorised                                                                                                                                    | 2 (supplementary file)    | Table S1: List of variables for 2007 and 2014 IFLS analyses                                                                                                                                                     |
|                   |             | (c) If relevant, consider translating estimates of relative risk into absolute risk for a meaningful time period                                                                                             |                           | N/A                                                                                                                                                                                                             |
| Other analyses    | 17          | Report other analyses done—eg analyses of subgroups and interactions, and sensitivity analyses                                                                                                               | 6–12 (supplementary file) | Tables S6–10. For example, “Our robustness analysis using cross-sectional analysis using 2014 cross-sectional dataset that consists of 14 physical NCDs (Tables S6–10) showed consistent results”               |
| <b>Discussion</b> |             |                                                                                                                                                                                                              |                           |                                                                                                                                                                                                                 |



|  | <b>Item</b>              | <b>Recommendation</b>                                                                                                                                                         | <b>Reported on page</b> | <b>Relevant text from manuscript</b>                                                                                                                                                      |
|--|--------------------------|-------------------------------------------------------------------------------------------------------------------------------------------------------------------------------|-------------------------|-------------------------------------------------------------------------------------------------------------------------------------------------------------------------------------------|
|  | Key results              | 18 Summarise key results with reference to study objectives                                                                                                                   | 15                      | “Multimorbidity was associated with significantly higher use of healthcare services, higher probability of catastrophic health expenditure, and a significant reduction in productivity.” |
|  | Limitations              | 19 Discuss limitations of the study, taking into account sources of potential bias or imprecision. Discuss both direction and magnitude of any potential bias                 | 18                      | “There are several limitations to our study.”                                                                                                                                             |
|  | Interpretation           | 20 Give a cautious overall interpretation of results considering objectives, limitations, multiplicity of analyses, results from similar studies, and other relevant evidence | 18                      | “Our findings should be interpreted with caution since the assessment of chronic diseases was mostly based on self-reporting”                                                             |
|  | Generalisability         | 21 Discuss the generalisability (external validity) of the study results                                                                                                      | 19                      | “This research intentionally focused on the older population due to a significantly higher burden of NCDs in this population group.”                                                      |
|  | <b>Other information</b> |                                                                                                                                                                               |                         |                                                                                                                                                                                           |
|  | Funding                  | 22 Give the source of funding and the role of the funders for the present study and, if applicable, for the original study on which the present article is based              | 20                      | Funding<br>This research received no specific grant from any funding agency in the public, commercial or not-for-profit sectors.                                                          |
